# Supplementary material for: Human-specific features of spatial gene expression and regulation in eight brain regions
Source: HighWire-hosted journal article supplement (doi:10.1101/gr.231357.117), 2018-06-13
Supplement: Supplemental_Table_S1.xlsx [file Supplemental_Table_S1.xlsx]

## Sheet: Supplemental Table S1
Supplemental Table S1. Sample information
Samples	Species	ID	Region Abbreviation	Region Detail	Age	Sex	Cause of death	RIN	Experimental batch	Sequencer	Post-mortem interval (hour)
Human_Hs1_ACC	Human	Hs1	ACC	anterior cingulate cortex	75y	male	Gastrointestinal bleeding	7.4	20141124	1500	3
Human_Hs1_CB	Human	Hs1	CB	cerebellum	75y	male	Gastrointestinal bleeding	6.5	20141124	1500	3
Human_Hs1_DPFC	Human	Hs1	DPFC	dorsolateral prefrontal cortex	75y	male	Gastrointestinal bleeding	7.6	20141124	1500	3
Human_Hs1_PMC	Human	Hs1	PMC	premotor cortex	75y	male	Gastrointestinal bleeding	7.3	20141124	1500	3
Human_Hs1_STR	Human	Hs1	STR	striatum	75y	male	Gastrointestinal bleeding	7	20141124	1500	3
Human_Hs1_V1C	Human	Hs1	V1C	primary visual cortex	75y	male	Gastrointestinal bleeding	6.5	20141124	1500	3
Human_Hs2_ACC	Human	Hs2	ACC	anterior cingulate cortex	76y	male	Lambert-Eaton syndrome	8	20130405	2000	3
Human_Hs2_CB	Human	Hs2	CB	cerebellum	76y	male	Lambert-Eaton syndrome	6.5	20130405	2000	3
Human_Hs2_DPFC	Human	Hs2	DPFC	dorsolateral prefrontal cortex	76y	male	Lambert-Eaton syndrome	8.1	20130408	2000	3
Human_Hs2_PMC	Human	Hs2	PMC	premotor cortex	76y	male	Lambert-Eaton syndrome	6.6	20130408	2000	3
Human_Hs2_STR	Human	Hs2	STR	striatum	76y	male	Lambert-Eaton syndrome	7.6	20130405	2000	3
Human_Hs2_V1C	Human	Hs2	V1C	primary visual cortex	76y	male	Lambert-Eaton syndrome	6.5	20130408	2000	3
Human_Hs2_VPFC	Human	Hs2	VPFC	ventrolateral prefrontal cortex	76y	male	Lambert-Eaton syndrome	7.7	20130408	2000	3
Human_Hs3_CB	Human	Hs3	CB	cerebellum	62y	male	Peripheral polyneuropathy	6.1	20141124	1500	9
Human_Hs3_DPFC	Human	Hs3	DPFC	dorsolateral prefrontal cortex	62y	male	Peripheral polyneuropathy	5.6	20140801	1500	9
Human_Hs3_PMC	Human	Hs3	PMC	premotor cortex	62y	male	Peripheral polyneuropathy	5.5	20141124	1500	9
Human_Hs4_HIP	Human	Hs4	HIP	hippocampus	61y	female	Pneumonia	8.3	20141124	1500	2.5
Human_Hs5_ACC	Human	Hs5	ACC	anterior cingulate cortex	51y	male	Acute abdomen	7.5	20130408	2000	6
Human_Hs5_DPFC	Human	Hs5	DPFC	dorsolateral prefrontal cortex	51y	male	Acute abdomen	8.5	20130408	2000	6
Human_Hs5_PMC	Human	Hs5	PMC	premotor cortex	51y	male	Acute abdomen	7.9	20130408	2000	6
Human_Hs5_STR	Human	Hs5	STR	striatum	51y	male	Acute abdomen	7.7	20130408	2000	6
Human_Hs5_V1C	Human	Hs5	V1C	primary visual cortex	51y	male	Acute abdomen	6.5	20130408	2000	6
Human_Hs5_VPFC	Human	Hs5	VPFC	ventrolateral prefrontal cortex	51y	male	Acute abdomen	7.9	20130408	2000	6
Human_Hs6_ACC	Human	Hs6	ACC	anterior cingulate cortex	55y	female	Adult T-cell leukemia	6.3	20141111	1500	3
Human_Hs6_CB	Human	Hs6	CB	cerebellum	55y	female	Adult T-cell leukemia	7.2	20140801	1500	3
Human_Hs6_DPFC	Human	Hs6	DPFC	dorsolateral prefrontal cortex	55y	female	Adult T-cell leukemia	7.3	20141124	1500	3
Human_Hs6_HIP	Human	Hs6	HIP	hippocampus	55y	female	Adult T-cell leukemia	6.8	20140801	1500	3
Human_Hs6_PMC	Human	Hs6	PMC	premotor cortex	55y	female	Adult T-cell leukemia	7.2	20140801	1500	3
Human_Hs6_STR	Human	Hs6	STR	striatum	55y	female	Adult T-cell leukemia	6.8	20141111	1500	3
Human_Hs6_V1C	Human	Hs6	V1C	primary visual cortex	55y	female	Adult T-cell leukemia	7.3	20140801	1500	3
Human_Hs6_VPFC	Human	Hs6	VPFC	ventrolateral prefrontal cortex	55y	female	Adult T-cell leukemia	6.9	20140801	1500	3
Human_Hs7_HIP	Human	Hs7	HIP	hippocampus	67y	male	Hemophagocytic syndrome	8.5	20141124	1500	1.5
Human_Hs8_ACC	Human	Hs8	ACC	anterior cingulate cortex	64y	male	Renal failure	8.1	20141111	1500	3.5
Human_Hs8_CB	Human	Hs8	CB	cerebellum	64y	male	Renal failure	8.1	20141111	1500	3.5
Human_Hs8_DPFC	Human	Hs8	DPFC	dorsolateral prefrontal cortex	64y	male	Renal failure	8.3	20141111	1500	3.5
Human_Hs8_PMC	Human	Hs8	PMC	premotor cortex	64y	male	Renal failure	8.3	20141111	1500	3.5
Human_Hs8_STR	Human	Hs8	STR	striatum	64y	male	Renal failure	8.5	20140801	1500	3.5
Human_Hs8_V1C	Human	Hs8	V1C	primary visual cortex	64y	male	Renal failure	8	20141111	1500	3.5
Human_Hs8_VPFC	Human	Hs8	VPFC	ventrolateral prefrontal cortex	64y	male	Renal failure	7.9	20141111	1500	3.5
Human_Hs9_HIP	Human	Hs9	HIP	hippocampus	27y	male	Unknown	8.9	20141124	1500	NA
Chimpanzee_GENKI_DPFC	Chimpanzee	GENKI	DPFC	dorsolateral prefrontal cortex	38y	male	Renal failure	6	20130405	2000	<12
Chimpanzee_GENKI_PMC	Chimpanzee	GENKI	PMC	premotor cortex	38y	male	Renal failure	6.1	20130405	2000	<12
Chimpanzee_GENKI_STR	Chimpanzee	GENKI	STR	striatum	38y	male	Renal failure	5.4	20130405	2000	<12
Chimpanzee_GENKI_V1C	Chimpanzee	GENKI	V1C	primary visual cortex	38y	male	Renal failure	5.3	20130405	2000	<12
Chimpanzee_GENKI_VPFC	Chimpanzee	GENKI	VPFC	ventrolateral prefrontal cortex	38y	male	Renal failure	5.1	20130405	2000	<12
Chimpanzee_IYO_ACC	Chimpanzee	IYO	ACC	anterior cingulate cortex	34y	female	Squamous cell carcinoma	5.6	20130405	2000	<9
Chimpanzee_IYO_CB	Chimpanzee	IYO	CB	cerebellum	34y	female	Squamous cell carcinoma	7.5	20130405	2000	<9
Chimpanzee_IYO_DPFC	Chimpanzee	IYO	DPFC	dorsolateral prefrontal cortex	34y	female	Squamous cell carcinoma	5.9	20130405	2000	<9
Chimpanzee_IYO_HIP	Chimpanzee	IYO	HIP	hippocampus	34y	female	Squamous cell carcinoma	5.6	20130405	2000	<9
Chimpanzee_IYO_STR	Chimpanzee	IYO	STR	striatum	34y	female	Squamous cell carcinoma	6.3	20130405	2000	<9
Chimpanzee_IYO_V1C	Chimpanzee	IYO	V1C	primary visual cortex	34y	female	Squamous cell carcinoma	5.1	20130405	2000	<9
Chimpanzee_IYO_VPFC	Chimpanzee	IYO	VPFC	ventrolateral prefrontal cortex	34y	female	Squamous cell carcinoma	5.5	20130405	2000	<9
Chimpanzee_KENNY_ACC	Chimpanzee	KENNY	ACC	anterior cingulate cortex	24y	female	Acute heart failure	5	20141111	1500	6
Chimpanzee_KENNY_CB	Chimpanzee	KENNY	CB	cerebellum	24y	female	Acute heart failure	4	20141111	1500	6
Chimpanzee_KENNY_DPFC	Chimpanzee	KENNY	DPFC	dorsolateral prefrontal cortex	24y	female	Acute heart failure	3.4	20141111	1500	6
Chimpanzee_KENNY_HIP	Chimpanzee	KENNY	HIP	hippocampus	24y	female	Acute heart failure	3.9	20141111	1500	6
Chimpanzee_KENNY_PMC	Chimpanzee	KENNY	PMC	premotor cortex	24y	female	Acute heart failure	3.6	20141111	1500	6
Chimpanzee_KENNY_STR	Chimpanzee	KENNY	STR	striatum	24y	female	Acute heart failure	5.5	20141111	1500	6
Chimpanzee_KENNY_V1C	Chimpanzee	KENNY	V1C	primary visual cortex	24y	female	Acute heart failure	2.9	20141111	1500	6
Chimpanzee_KENNY_VPFC	Chimpanzee	KENNY	VPFC	ventrolateral prefrontal cortex	24y	female	Acute heart failure	7.6	20141111	1500	6
Chimpanzee_MAYUMI_ACC	Chimpanzee	MAYUMI	ACC	anterior cingulate cortex	28y	female	Tension pneumothorax	7.1	20130405	2000	<12
Chimpanzee_MAYUMI_CB	Chimpanzee	MAYUMI	CB	cerebellum	28y	female	Tension pneumothorax	7.5	20130405	2000	<12
Chimpanzee_MAYUMI_DPFC	Chimpanzee	MAYUMI	DPFC	dorsolateral prefrontal cortex	28y	female	Tension pneumothorax	6.5	20130405	2000	<12
Chimpanzee_MAYUMI_HIP	Chimpanzee	MAYUMI	HIP	hippocampus	28y	female	Tension pneumothorax	6.1	20130405	2000	<12
Chimpanzee_MAYUMI_PMC	Chimpanzee	MAYUMI	PMC	premotor cortex	28y	female	Tension pneumothorax	6.3	20130405	2000	<12
Chimpanzee_MAYUMI_STR	Chimpanzee	MAYUMI	STR	striatum	28y	female	Tension pneumothorax	6.4	20130405	2000	<12
Chimpanzee_MAYUMI_V1C	Chimpanzee	MAYUMI	V1C	primary visual cortex	28y	female	Tension pneumothorax	7.6	20130405	2000	<12
Chimpanzee_MAYUMI_VPFC	Chimpanzee	MAYUMI	VPFC	ventrolateral prefrontal cortex	28y	female	Tension pneumothorax	7	20130405	2000	<12
Chimpanzee_REIKO_ACC	Chimpanzee	REIKO	ACC	anterior cingulate cortex	46y	female	Unknown	5.6	20141124	1500	3
Chimpanzee_REIKO_CB	Chimpanzee	REIKO	CB	cerebellum	46y	female	Unknown	4	20141124	1500	3
Chimpanzee_REIKO_DPFC	Chimpanzee	REIKO	DPFC	dorsolateral prefrontal cortex	46y	female	Unknown	5.1	20141124	1500	3
Chimpanzee_REIKO_HIP	Chimpanzee	REIKO	HIP	hippocampus	46y	female	Unknown	5.5	20141124	1500	3
Chimpanzee_REIKO_PMC	Chimpanzee	REIKO	PMC	premotor cortex	46y	female	Unknown	6.5	20141124	1500	3
Chimpanzee_REIKO_STR	Chimpanzee	REIKO	STR	striatum	46y	female	Unknown	6.5	20141124	1500	3
Chimpanzee_REIKO_V1C	Chimpanzee	REIKO	V1C	primary visual cortex	46y	female	Unknown	4.4	20141124	1500	3
Chimpanzee_REIKO_VPFC	Chimpanzee	REIKO	VPFC	ventrolateral prefrontal cortex	46y	female	Unknown	5.2	20141124	1500	3
Chimpanzee_YOSHIO_ACC	Chimpanzee	YOSHIO	ACC	anterior cingulate cortex	29y	male	Intestinal obstruction	5.5	20130405	2000	16
Chimpanzee_YOSHIO_CB	Chimpanzee	YOSHIO	CB	cerebellum	29y	male	Intestinal obstruction	5.3	20130405	2000	16
Chimpanzee_YOSHIO_DPFC	Chimpanzee	YOSHIO	DPFC	dorsolateral prefrontal cortex	29y	male	Intestinal obstruction	5.6	20130405	2000	16
Chimpanzee_YOSHIO_HIP	Chimpanzee	YOSHIO	HIP	hippocampus	29y	male	Intestinal obstruction	5.1	20130405	2000	16
Chimpanzee_YOSHIO_PMC	Chimpanzee	YOSHIO	PMC	premotor cortex	29y	male	Intestinal obstruction	5.2	20130405	2000	16
Chimpanzee_YOSHIO_STR	Chimpanzee	YOSHIO	STR	striatum	29y	male	Intestinal obstruction	4.9	20130405	2000	16
Chimpanzee_YOSHIO_VPFC	Chimpanzee	YOSHIO	VPFC	ventrolateral prefrontal cortex	29y	male	Intestinal obstruction	5.4	20130405	2000	16
Gorilla_GON_ACC	Gorilla	GON	ACC	anterior cingulate cortex	38y	male	Sinusitis	8	20130405	2000	9
Gorilla_GON_CB	Gorilla	GON	CB	cerebellum	38y	male	Sinusitis	8.1	20130408	2000	9
Gorilla_GON_DPFC	Gorilla	GON	DPFC	dorsolateral prefrontal cortex	38y	male	Sinusitis	7.6	20130405	2000	9
Gorilla_GON_HIP	Gorilla	GON	HIP	hippocampus	38y	male	Sinusitis	7.7	20130408	2000	9
Gorilla_GON_PMC	Gorilla	GON	PMC	premotor cortex	38y	male	Sinusitis	7.3	20130405	2000	9
Gorilla_GON_STR	Gorilla	GON	STR	striatum	38y	male	Sinusitis	7.6	20130405	2000	9
Gorilla_GON_V1C	Gorilla	GON	V1C	primary visual cortex	38y	male	Sinusitis	6.9	20130405	2000	9
Gorilla_GON_VPFC	Gorilla	GON	VPFC	ventrolateral prefrontal cortex	38y	male	Sinusitis	7.7	20130405	2000	9
Gorilla_Sakura_ACC	Gorilla	SAKURA	ACC	anterior cingulate cortex	38y	female	Heart failure	6.6	20160401	4000	<15
Gorilla_Sakura_CB	Gorilla	SAKURA	CB	cerebellum	38y	female	Heart failure	6	20160401	4000	<15
Gorilla_Sakura_DPFC	Gorilla	SAKURA	DPFC	dorsolateral prefrontal cortex	38y	female	Heart failure	6.5	20160401	4000	<15
Gorilla_Sakura_HIP	Gorilla	SAKURA	HIP	hippocampus	38y	female	Heart failure	7.6	20160401	4000	<15
Gorilla_Sakura_PMC	Gorilla	SAKURA	PMC	premotor cortex	38y	female	Heart failure	7.1	20160401	4000	<15
Gorilla_Sakura_STR	Gorilla	SAKURA	STR	striatum	38y	female	Heart failure	6.3	20160401	4000	<15
Gorilla_Sakura_V1C	Gorilla	SAKURA	V1C	primary visual cortex	38y	female	Heart failure	6.5	20160401	4000	<15
Gorilla_Sakura_VPFC	Gorilla	SAKURA	VPFC	ventrolateral prefrontal cortex	38y	female	Heart failure	5.9	20160401	4000	<15
Gibbon_DAICHI_ACC	Gibbon	DAICHI	ACC	anterior cingulate cortex	9y	male	Unknown	6.4	20130405	2000	<24
Gibbon_DAICHI_CB	Gibbon	DAICHI	CB	cerebellum	9y	male	Unknown	6.1	20130405	2000	<24
Gibbon_DAICHI_DPFC	Gibbon	DAICHI	DPFC	dorsolateral prefrontal cortex	9y	male	Unknown	6.3	20130408	2000	<24
Gibbon_DAICHI_HIP	Gibbon	DAICHI	HIP	hippocampus	9y	male	Unknown	7	20130405	2000	<24
Gibbon_DAICHI_PMC	Gibbon	DAICHI	PMC	premotor cortex	9y	male	Unknown	6.2	20130408	2000	<24
Gibbon_DAICHI_STR	Gibbon	DAICHI	STR	striatum	9y	male	Unknown	6.1	20130405	2000	<24
Gibbon_DAICHI_V1C	Gibbon	DAICHI	V1C	primary visual cortex	9y	male	Unknown	6	20130405	2000	<24
Gibbon_DAICHI_VPFC	Gibbon	DAICHI	VPFC	ventrolateral prefrontal cortex	9y	male	Unknown	6.9	20130408	2000	<24
