# Supplementary material for: Human-specific features of spatial gene expression and regulation in eight brain regions
Source: HighWire-hosted journal article supplement (doi:10.1101/gr.231357.117), 2018-06-13
Supplement: Supplemental_Table_S2.xlsx [file Supplemental_Table_S2.xlsx]

## Sheet: Supplemental Table S2
Supplemental Table S2. Number of individuals used in transcriptome and epigenome measurements
Transcriptome	DPFC	VPFC	PMC	V1C	ACC	STR	HIP	CB	Total individuals
Human	6	4	6	5	5	5	4	5	9
Chimpanzee	6	6	5	5	5	6	5	5	6
Gorilla	2	2	2	2	2	2	2	2	2
Gibbon	1	1	1	1	1	1	1	1	1
Epigenome	PFC	PcGm	OP	CN	Put	CB	TN	WT	Total individuals
Human	3	3	3	3	3	3	3	3	4
Chimpanzee	2	2	2	2	2	2	2	2	3
Macaque	3	3	3	3	3	3	3	3	3
