# Supplementary material for: Human-specific features of spatial gene expression and regulation in eight brain regions
Source: HighWire-hosted journal article supplement (doi:10.1101/gr.231357.117), 2018-06-13
Supplement: Supplemental_Table_S3.xlsx [file Supplemental_Table_S3.xlsx]

## Sheet: Supplemental Table S3
Supplemental Table S3. Number of sequenced and mapped read pairs
Sample	total read pairs	uniquely mapped read pairs	uniquely mapped percentage
Human_Hs5_DPFC	29040254	21175696	0.729184
Human_Hs5_VPFC	21970752	15092918	0.686955
Human_Hs5_PMC	24541078	20664807	0.84205
Human_Hs5_V1C	27173256	16787609	0.617799
Human_Hs5_ACC	41116676	23169470	0.563505
Human_Hs5_STR	19214215	13974926	0.727322
Human_Hs2_DPFC	26559473	21892925	0.824298
Human_Hs2_VPFC	24530238	20194281	0.82324
Human_Hs2_PMC	47057415	36812175	0.782282
Human_Hs2_V1C	24857353	19998862	0.804545
Human_Hs2_ACC	28898840	19159676	0.662991
Human_Hs2_STR	36008608	24947163	0.692811
Human_Hs2_CB	22829200	14903632	0.652832
Human_Hs6_DPFC	34625722	25300555	0.730687
Human_Hs6_VPFC	28082693	20596139	0.73341
Human_Hs6_PMC	8464997	6332930	0.748131
Human_Hs6_V1C	31057007	23019541	0.741203
Human_Hs6_ACC	112341349	74875343	0.666499
Human_Hs6_STR	164050764	112778681	0.687462
Human_Hs6_HIP	29006690	21117709	0.728029
Human_Hs6_CB	41447431	32197238	0.776821
Human_Hs8_DPFC	84285804	65214256	0.773728
Human_Hs8_VPFC	28821669	21997463	0.763227
Human_Hs8_PMC	59241622	45669850	0.770908
Human_Hs8_V1C	23003076	17756266	0.771908
Human_Hs8_ACC	19273861	14728286	0.764159
Human_Hs8_STR	25288095	18536027	0.732994
Human_Hs8_CB	48292809	38321721	0.793529
Human_Hs3_DPFC	22829495	17428039	0.7634
Human_Hs3_PMC	32502750	24112289	0.741854
Human_Hs3_CB	32129971	24271844	0.755427
Human_Hs1_DPFC	29709386	23131654	0.778598
Human_Hs1_PMC	34585711	28367521	0.820209
Human_Hs1_V1C	52598589	37078691	0.704937
Human_Hs1_ACC	51595328	37375858	0.724404
Human_Hs1_STR	48976686	33860847	0.691367
Human_Hs1_CB	48257562	37592513	0.778997
Human_Hs4_HIP	39189630	27998486	0.714436
Human_Hs7_HIP	40265551	27313949	0.678345
Human_Hs9_HIP	30762992	23095169	0.750745
Chimpanzee_GENKI_DPFC	31145484	20201079	0.648604
Chimpanzee_GENKI_VPFC	29609035	17859599	0.603181
Chimpanzee_GENKI_PMC	28283202	14866891	0.525644
Chimpanzee_GENKI_V1C	31292350	14237917	0.454997
Chimpanzee_GENKI_STR	33460808	18671424	0.558009
Chimpanzee_MAYUMI_DPFC	26351387	14363476	0.545075
Chimpanzee_MAYUMI_VPFC	31568735	16128378	0.510897
Chimpanzee_MAYUMI_PMC	33726556	16636782	0.493284
Chimpanzee_MAYUMI_V1C	24875013	14353634	0.57703
Chimpanzee_MAYUMI_ACC	29005379	16566519	0.571153
Chimpanzee_MAYUMI_STR	32976447	18830795	0.571038
Chimpanzee_MAYUMI_HIP	37797317	18497931	0.489398
Chimpanzee_MAYUMI_CB	32931996	24772588	0.752235
Chimpanzee_YOSHIO_DPFC	28063440	16328163	0.58183
Chimpanzee_YOSHIO_VPFC	24952346	13111955	0.52548
Chimpanzee_YOSHIO_PMC	20852523	13454484	0.645221
Chimpanzee_YOSHIO_ACC	41699663	27000928	0.64751
Chimpanzee_YOSHIO_STR	41534414	33034618	0.795355
Chimpanzee_YOSHIO_HIP	37322817	23379875	0.626423
Chimpanzee_YOSHIO_CB	32062052	21695236	0.676664
Chimpanzee_IYO_DPFC	18182451	11788244	0.648331
Chimpanzee_IYO_VPFC	34653618	25893097	0.747198
Chimpanzee_IYO_V1C	25692860	18223733	0.709292
Chimpanzee_IYO_ACC	25003027	17014192	0.680485
Chimpanzee_IYO_STR	34648954	27588214	0.796221
Chimpanzee_IYO_HIP	38077403	28237508	0.741582
Chimpanzee_IYO_CB	22444671	17987134	0.801399
Chimpanzee_REIKO_DPFC	41133106	26766768	0.650735
Chimpanzee_REIKO_VPFC	25003854	16699224	0.667866
Chimpanzee_REIKO_PMC	31155598	19543789	0.627296
Chimpanzee_REIKO_V1C	53775418	40711030	0.757057
Chimpanzee_REIKO_ACC	56145392	43497906	0.774737
Chimpanzee_REIKO_STR	45676207	34051106	0.745489
Chimpanzee_REIKO_HIP	16148393	10212838	0.632437
Chimpanzee_REIKO_CB	36837994	27566363	0.748313
Chimpanzee_KENNY_DPFC	54996929	37635591	0.684322
Chimpanzee_KENNY_VPFC	57792537	37709898	0.652505
Chimpanzee_KENNY_PMC	58179095	38560075	0.662782
Chimpanzee_KENNY_V1C	51087359	33903959	0.663647
Chimpanzee_KENNY_ACC	55001338	35974146	0.654059
Chimpanzee_KENNY_STR	67373920	41675875	0.618576
Chimpanzee_KENNY_HIP	47051454	30021742	0.638062
Chimpanzee_KENNY_CB	50592896	33821853	0.66851
Gorilla_GON_DPFC	21646252	16472192	0.760972
Gorilla_GON_VPFC	32088300	24443046	0.761743
Gorilla_GON_PMC	41361439	22537408	0.544889
Gorilla_GON_V1C	28376264	18305105	0.645085
Gorilla_GON_ACC	26348091	15249067	0.578754
Gorilla_GON_STR	36504201	21845246	0.598431
Gorilla_GON_HIP	32239517	18708890	0.580309
Gorilla_GON_CB	36345878	23132574	0.636457
Gorilla_Sakura_DPFC	12171096	7221951	0.593369
Gorilla_Sakura_VPFC	12323028	7528060	0.610894
Gorilla_Sakura_PMC	11964653	7130861	0.595994
Gorilla_Sakura_V1C	5067504	3047000	0.601282
Gorilla_Sakura_ACC	14346857	7756045	0.540609
Gorilla_Sakura_STR	15639550	8253287	0.527719
Gorilla_Sakura_HIP	15620663	8421663	0.539136
Gorilla_Sakura_CB	14500688	8955078	0.617562
Gibbon_DAICHI_DPFC	41127599	18612789	0.452562
Gibbon_DAICHI_VPFC	42147435	20452650	0.485264
Gibbon_DAICHI_PMC	29524518	14914351	0.505151
Gibbon_DAICHI_V1C	33227237	17655426	0.531354
Gibbon_DAICHI_ACC	29007968	14212585	0.489955
Gibbon_DAICHI_STR	39908812	21814593	0.546611
Gibbon_DAICHI_HIP	46203902	28769060	0.622654
Gibbon_DAICHI_CB	43991856	28636020	0.650939
