# Supplementary material for: Human-specific features of spatial gene expression and regulation in eight brain regions
Source: HighWire-hosted journal article supplement (doi:10.1101/gr.231357.117), 2018-06-13
Supplement: Supplemental_Table_S4.xlsx [file Supplemental_Table_S4.xlsx]

## Sheet: Supplemental Table S4
Supplemental Table S4. Raw count for CREs in each species
CRE	chromosome	start	stop	HS1_OP	HS2_OP	HS3_OP	HS1_WM	HS2_WM	HS3_WM	HS1_CN	HS2_CN	HS3_CN	HS1_TN	HS2_TN	HS3_TN	HS1_Put	HS2_Put	HS3_Put	HS1_PcGm	HS2_PcGm	HS3_PcGm	HS1_CB	HS2_CB	HS4_CB	HS1_PFC	HS2_PFC	HS3_PFC	PT1_CN	PT3_CN	PT1_CB	PT2_CB	PT1_OP	PT3_OP	PT1_PcGm	PT3_PcGm	PT1_PFC	PT3_PFC	PT1_Put	PT3_Put	PT2_TN	PT3_TN	PT1_WM	PT3_WM	RM1_OP	RM2_OP	RM3_OP	RM1_WM	RM2_WM	RM3_WM
chr1_905288_hg38	chr1	903340	907236	121	33	153	104	17	121	109	29	128	165	127	121	109	44	138	119	47	118	185	42	10	93	22	130	4	6	10	8	20	21	13	9	15	15	4	13	19	10	14	10	87	56	83	42	25	85
chr1_1156232_hg38	chr1	1152216	1160249	372	188	766	777	229	959	864	151	1037	1088	1033	852	897	324	1082	810	166	692	630	162	58	376	95	705	129	178	80	54	165	186	240	165	347	154	190	162	246	195	229	220	32	49	59	78	40	94
chr1_1216472_hg38	chr1	1211350	1221595	359	141	794	261	45	352	266	67	307	317	299	207	255	82	336	364	57	368	3709	1070	147	260	30	421	44	91	177	283	167	221	131	144	157	140	79	75	173	136	70	89	133	113	154	100	41	188
chr1_1229159_hg38	chr1	1224412	1233906	267	70	515	279	85	451	296	64	398	479	383	340	398	133	387	403	88	332	2588	959	211	238	29	345	106	183	244	196	231	309	221	213	241	221	172	155	229	191	156	228	102	100	199	168	94	326
chr1_1270943_hg38	chr1	1269923	1271963	47	32	74	38	41	103	72	26	70	79	82	57	60	38	69	54	22	67	59	35	20	45	17	64	14	71	29	26	58	64	55	53	45	66	35	39	74	68	29	76	22	39	47	55	31	85
chr1_1274548_hg38	chr1	1272163	1276934	235	71	547	421	47	403	411	51	479	592	446	413	418	90	491	417	56	412	1250	200	46	283	26	394	96	184	265	190	251	326	257	191	251	169	205	146	257	210	195	227	142	150	168	162	91	269
chr1_1441414_hg38	chr1	1440129	1442698	68	38	154	224	29	286	236	33	316	374	238	246	215	94	282	165	38	179	37	19	10	109	27	184	69	66	33	28	102	105	149	63	140	53	97	87	115	117	133	150	49	69	95	179	76	324
chr1_1558944_hg38	chr1	1557940	1559948	24	24	47	63	25	48	41	35	35	60	65	35	52	56	38	40	39	44	37	53	11	27	15	34	14	28	26	26	16	36	45	26	35	31	32	28	56	30	30	46	14	9	26	21	14	31
chr1_1567730_hg38	chr1	1566165	1569294	65	58	82	142	83	158	162	77	145	109	130	97	172	125	162	133	26	105	69	37	25	74	17	87	30	39	28	28	39	58	74	42	57	40	37	43	61	33	50	94	37	54	83	43	59	248
chr1_1758848_hg38	chr1	1757512	1760183	67	21	134	68	16	110	80	26	65	200	144	97	99	58	96	112	9	105	370	152	31	88	10	143	29	62	90	56	69	85	66	58	80	75	30	61	104	83	46	73	60	58	83	61	32	106
chr1_1788443_hg38	chr1	1786778	1790108	91	102	197	172	90	257	208	107	246	193	251	240	253	175	216	158	69	194	264	248	76	138	34	211	62	119	113	92	111	111	113	101	115	81	67	93	131	109	84	152	100	94	145	142	68	272
chr1_1833839_hg38	chr1	1832376	1835302	118	143	193	123	131	239	244	110	247	150	204	209	210	250	218	171	129	190	241	125	76	110	23	201	67	99	70	47	118	120	130	100	123	72	98	97	157	121	142	154	72	53	66	70	38	114
chr1_1841104_hg38	chr1	1839436	1842771	84	137	170	145	198	309	280	126	291	103	252	262	236	260	266	184	102	220	120	59	51	129	49	210	70	112	45	23	100	84	134	69	120	44	80	70	128	78	107	135	38	15	40	42	17	36
chr1_1853668_hg38	chr1	1852018	1855319	73	82	133	93	122	332	214	88	238	108	208	206	133	163	219	153	120	163	54	40	53	116	44	171	67	80	53	26	75	66	125	75	118	54	73	68	141	87	85	123	77	78	91	109	64	174
chr1_1874205_hg38	chr1	1873149	1875261	36	17	59	50	44	84	55	38	66	52	57	54	52	54	54	47	29	53	199	132	40	33	31	46	25	29	50	39	38	46	36	19	19	31	19	22	42	31	27	32	21	24	32	27	17	44
chr1_1892512_hg38	chr1	1888564	1896459	373	244	972	468	104	677	506	125	654	660	622	572	524	237	676	646	132	596	1475	676	185	451	52	635	141	257	355	292	406	491	315	288	296	287	230	219	296	246	237	252	196	166	249	220	113	352
chr1_1919486_hg38	chr1	1917855	1921117	66	20	121	194	21	156	102	26	163	148	128	138	116	28	173	95	14	138	533	123	21	89	8	112	34	45	88	157	53	59	57	45	78	50	50	50	83	42	42	59	39	31	69	65	46	147
chr1_1922952_hg38	chr1	1921955	1923950	19	9	27	37	14	33	18	13	29	29	30	30	27	16	27	22	6	26	120	102	9	15	5	34	13	18	58	90	29	26	19	24	37	33	16	15	23	23	19	11	8	15	25	16	12	40
chr1_1946975_hg38	chr1	1945754	1948196	21	16	64	42	12	55	44	13	47	70	30	31	41	32	38	45	13	33	193	180	45	18	12	40	23	41	123	111	54	24	48	23	35	23	29	23	51	35	45	59	3	6	25	9	10	18
chr1_1958926_hg38	chr1	1955701	1962150	144	191	426	67	30	93	69	40	67	92	95	57	72	46	59	137	52	150	719	578	161	135	46	161	33	62	324	310	128	112	72	58	70	100	52	37	59	50	36	47	86	50	84	29	22	48
chr1_2044224_hg38	chr1	2042405	2046044	94	118	362	123	13	112	111	28	148	95	102	93	101	47	175	161	21	207	522	416	126	161	16	266	36	39	66	76	135	86	69	51	78	69	63	39	48	48	53	65	120	71	102	33	24	62
chr1_2060138_hg38	chr1	2058844	2061431	29	13	37	44	14	54	39	18	50	45	56	47	48	16	43	37	18	40	675	325	65	21	7	39	46	60	55	125	43	46	82	32	63	53	56	41	92	68	72	84	8	15	20	24	9	37
chr1_2090808_hg38	chr1	2084476	2097139	466	422	1215	1038	381	1473	905	338	1613	1170	1217	1194	965	793	1436	784	363	1010	3369	2704	445	426	115	925	432	399	684	726	608	522	668	404	755	276	498	450	653	395	662	705	428	430	764	1206	594	1801
chr1_2099841_hg38	chr1	2098853	2100829	87	112	226	103	55	163	88	34	110	100	108	85	109	82	115	95	28	113	239	275	68	59	23	125	44	52	82	59	102	94	85	51	96	40	47	64	92	66	65	104	78	76	118	148	95	271
chr1_2103466_hg38	chr1	2102283	2104649	75	68	157	121	41	121	80	36	95	90	94	73	101	58	105	86	24	101	329	270	62	48	10	75	49	100	71	68	78	80	85	39	82	55	63	66	78	70	81	140	27	34	60	78	32	121
chr1_2135502_hg38	chr1	2131703	2139301	368	465	1052	432	164	648	481	259	663	715	668	566	572	463	670	566	184	612	1296	1416	269	489	109	673	165	259	189	199	306	355	306	228	321	156	239	227	434	225	237	395	357	245	419	409	152	705
chr1_2185036_hg38	chr1	2183958	2186115	31	24	64	33	16	41	32	13	33	32	40	25	39	29	33	41	9	36	780	601	73	31	5	48	13	22	97	110	38	50	28	36	32	35	14	16	23	23	14	21	47	35	70	26	9	38
chr1_2198970_hg38	chr1	2197898	2200042	96	103	243	84	34	102	127	45	117	202	165	108	140	73	166	159	49	191	230	220	47	145	35	202	30	42	46	24	82	86	40	48	43	63	26	24	43	41	28	33	65	47	60	36	24	80
chr1_2205120_hg38	chr1	2203461	2206778	160	42	273	249	23	250	311	36	283	354	256	275	296	61	302	288	24	255	770	227	35	207	13	240	30	55	46	43	56	58	50	52	51	57	29	53	71	41	44	50	66	76	105	79	58	139
chr1_2238687_hg38	chr1	2236286	2241088	209	183	527	302	124	479	392	150	440	591	523	440	363	235	378	382	80	415	817	837	121	270	72	432	52	161	202	165	115	142	139	125	100	122	81	88	182	117	88	115	149	122	227	238	147	440
chr1_2248644_hg38	chr1	2246926	2250363	149	123	251	251	73	360	238	98	346	431	318	334	214	140	331	233	85	281	614	541	88	156	36	259	81	161	125	137	92	154	150	115	123	141	99	90	172	122	125	148	84	105	170	264	122	445
chr1_2256400_hg38	chr1	2254642	2258157	161	184	346	160	147	264	240	111	287	258	307	300	252	198	276	266	172	285	508	507	201	234	97	288	64	135	127	137	118	124	138	103	163	100	80	64	149	99	91	117	105	111	177	174	84	237
chr1_2273576_hg38	chr1	2272587	2274565	71	42	125	50	20	79	74	37	53	108	78	82	78	39	62	92	22	98	746	548	45	102	14	109	26	65	195	233	90	69	39	47	34	52	30	31	59	39	31	47	48	47	61	47	25	100
chr1_2308308_hg38	chr1	2298255	2318362	913	534	2444	1042	174	1114	1189	275	1178	1930	1408	1106	1287	411	1252	1539	293	1556	8764	5585	452	1252	138	1692	366	761	3115	2603	923	1155	781	756	803	806	563	592	849	626	517	717	575	471	651	426	242	772
chr1_2391980_hg38	chr1	2390201	2393759	170	48	416	212	38	210	272	50	246	314	254	268	318	79	271	297	37	219	765	126	55	199	28	240	48	100	70	48	98	145	107	111	107	92	97	77	120	88	87	113	88	61	100	113	50	164
chr1_2413330_hg38	chr1	2411008	2415652	196	59	566	369	45	515	344	48	552	565	437	465	417	73	470	370	57	425	824	131	26	288	20	425	98	106	124	99	180	192	160	127	145	135	132	92	160	156	109	134	120	91	164	178	93	278
chr1_2437718_hg38	chr1	2435263	2440173	92	85	238	203	67	332	111	34	317	196	174	291	120	49	262	158	44	318	432	299	86	128	19	256	43	51	96	94	86	123	97	93	94	114	44	28	66	45	46	71	76	94	137	82	53	114
chr1_2875602_hg38	chr1	2874035	2877170	38	15	45	111	29	171	80	29	80	138	89	91	73	37	74	48	24	66	19	13	5	48	11	53	20	40	39	38	48	53	51	38	51	50	45	37	62	56	50	80	20	39	53	85	60	124
chr1_2906118_hg38	chr1	2904804	2907432	39	16	50	112	41	159	96	22	62	118	86	69	75	79	72	53	13	65	26	3	3	33	10	57	27	44	27	23	42	46	64	21	43	31	23	17	57	37	37	59	12	15	26	26	31	46
chr1_2914426_hg38	chr1	2912724	2916129	66	57	116	185	79	391	99	46	237	173	144	246	102	110	180	125	30	194	20	11	6	55	38	187	48	42	19	33	62	50	81	27	58	31	40	27	56	53	84	78	10	51	34	41	32	56
chr1_2927971_hg38	chr1	2925590	2930352	125	117	239	83	39	132	68	44	99	72	93	99	37	65	95	118	21	141	95	109	42	66	27	151	38	58	152	277	152	147	103	79	69	83	49	38	75	53	61	64	36	45	65	40	25	56
chr1_2950920_hg38	chr1	2947838	2954002	195	214	283	531	217	497	319	133	633	489	448	570	341	360	540	270	179	354	33	23	11	128	91	328	131	132	37	34	209	114	232	62	237	80	167	97	229	117	213	204	15	19	46	37	30	67
chr1_3003870_hg38	chr1	3002765	3004974	36	60	74	169	57	196	98	40	209	147	175	184	115	110	170	79	21	105	12	44	5	38	19	114	23	21	18	22	18	11	39	16	31	19	23	19	42	16	27	29	8	6	7	9	6	35
chr1_3012566_hg38	chr1	3010836	3014295	112	106	240	266	129	420	246	94	383	336	391	431	211	200	372	211	116	280	25	31	6	122	47	265	72	94	29	31	70	94	149	77	121	80	99	74	130	79	97	148	35	36	57	43	31	107
chr1_3031002_hg38	chr1	3028789	3033215	151	101	297	585	185	558	401	87	758	690	578	611	450	257	618	288	121	398	27	25	3	120	40	308	59	73	34	19	64	58	108	56	101	52	63	65	140	105	104	149	32	25	47	46	25	112
chr1_3070328_hg38	chr1	3065742	3074914	118	68	620	223	31	407	211	103	430	405	506	630	206	90	493	335	58	565	55	18	2	308	40	698	81	262	59	41	124	182	124	215	133	282	120	118	230	152	105	128	216	224	248	154	113	385
chr1_3078611_hg38	chr1	3077018	3080204	90	84	216	78	23	108	95	72	167	159	154	259	80	71	214	126	30	206	19	17	5	131	33	248	39	105	31	14	70	80	62	64	54	86	39	49	101	70	40	58	108	107	138	58	50	173
chr1_3104854_hg38	chr1	3103748	3105959	36	35	138	57	10	86	50	32	83	106	103	158	38	22	104	73	25	131	12	7	4	83	15	132	15	49	13	24	39	38	43	59	41	68	32	22	68	33	20	27	55	65	58	43	38	99
chr1_3125568_hg38	chr1	3123649	3127487	74	45	242	147	28	219	122	50	170	240	237	256	86	47	183	162	45	238	33	26	13	132	23	245	46	116	31	29	80	106	112	107	107	127	61	62	164	108	77	128	131	112	154	98	70	222
chr1_3139832_hg38	chr1	3138564	3141100	56	31	87	143	52	152	98	37	87	171	106	123	112	77	112	92	53	107	13	9	2	72	26	125	37	81	30	14	54	57	84	54	52	46	40	48	79	69	55	75	45	56	79	40	37	115
chr1_3161584_hg38	chr1	3159710	3163458	57	30	187	81	24	150	103	70	143	194	187	258	103	60	174	158	44	176	54	28	7	132	27	225	38	85	30	16	61	55	59	58	53	78	47	32	99	53	36	95	115	93	122	96	72	213
chr1_3196505_hg38	chr1	3195505	3197505	24	10	60	43	2	42	71	25	52	111	70	55	62	11	52	63	12	50	11	5	1	55	7	60	14	41	20	10	35	48	29	46	20	59	27	26	49	33	15	32	21	41	39	10	13	37
chr1_3218547_hg38	chr1	3214492	3222602	206	177	296	467	186	657	340	217	418	578	498	474	389	307	393	394	145	433	88	36	20	249	86	481	107	233	82	86	225	245	204	195	183	197	114	121	395	221	163	291	194	223	295	235	182	460
chr1_3283762_hg38	chr1	3282628	3284897	57	35	98	65	16	119	79	24	100	117	96	100	52	49	78	75	31	90	22	7	11	66	16	93	23	54	37	21	71	56	50	48	47	56	31	30	64	31	31	66	51	51	121	49	30	116
chr1_3304418_hg38	chr1	3302888	3305949	45	26	43	138	62	105	86	39	51	102	100	70	95	76	52	75	46	57	11	11	4	56	24	59	31	61	15	23	33	45	79	41	49	40	39	52	104	58	54	90	14	9	16	11	11	22
chr1_3328720_hg38	chr1	3327517	3329924	64	33	63	127	36	108	101	29	68	182	112	76	76	45	74	135	21	96	23	6	1	64	12	115	24	49	24	22	30	44	49	36	42	44	29	22	51	33	28	43	32	56	69	72	50	149
chr1_3330994_hg38	chr1	3329958	3332031	48	36	93	50	19	63	55	39	86	152	104	106	41	49	99	92	27	130	12	7	3	65	23	129	16	48	20	21	32	42	43	34	42	50	26	15	50	20	32	38	26	41	47	35	24	107
chr1_3361160_hg38	chr1	3359712	3362607	54	23	49	139	25	164	112	33	80	178	104	89	84	40	94	97	36	64	18	9	3	52	5	87	38	54	34	22	50	57	57	72	50	59	38	50	139	41	52	93	19	23	35	44	32	111
chr1_3423568_hg38	chr1	3421211	3425924	121	77	275	295	84	367	196	78	242	374	361	309	214	123	229	223	74	320	76	43	9	166	48	323	74	97	48	37	113	107	155	79	123	139	72	72	132	111	103	145	31	43	100	113	83	239
chr1_3431583_hg38	chr1	3430335	3432831	38	25	49	149	42	150	95	27	114	216	137	99	86	36	86	137	29	83	19	7	2	64	11	103	41	55	31	16	60	43	104	38	79	50	51	46	65	62	62	68	14	29	45	58	39	89
chr1_3456282_hg38	chr1	3451952	3460613	254	165	492	653	228	940	494	164	640	831	651	664	503	334	631	388	145	606	161	67	29	228	66	497	126	176	114	76	184	173	229	127	164	188	136	110	212	177	141	192	76	101	168	163	110	315
chr1_3493402_hg38	chr1	3490533	3496272	76	15	123	148	13	156	105	26	122	214	128	123	102	27	101	113	19	114	892	285	58	93	14	121	43	62	82	64	108	97	84	75	97	85	54	47	99	60	76	98	43	50	103	105	54	205
chr1_3510430_hg38	chr1	3509042	3511817	25	5	66	21	5	34	119	22	65	43	38	46	129	13	126	45	1	40	35	23	2	57	5	60	5	33	34	30	50	52	17	20	22	51	22	21	28	17	19	12	10	13	22	20	16	36
chr1_3516097_hg38	chr1	3515111	3517083	22	6	58	47	4	45	35	7	37	94	58	51	24	9	36	37	2	43	105	55	8	28	4	63	13	18	41	63	41	45	25	34	31	53	23	15	29	22	26	20	4	25	36	18	6	45
chr1_3524264_hg38	chr1	3522797	3525732	38	8	67	45	5	58	39	11	40	87	45	42	50	13	44	57	7	51	290	179	42	27	4	46	10	30	21	19	34	23	36	34	23	55	29	17	29	31	26	20	19	19	26	43	18	56
chr1_3530204_hg38	chr1	3527302	3533107	197	50	335	127	14	163	141	33	150	251	146	128	160	25	152	228	30	232	400	269	74	146	30	269	29	53	66	38	83	84	55	56	53	86	41	33	71	56	29	33	51	55	119	98	51	143
chr1_3540740_hg38	chr1	3537595	3543886	183	66	293	155	19	188	285	48	170	419	259	189	290	61	237	274	134	249	416	218	40	175	34	249	68	149	97	99	143	155	156	119	140	168	113	86	154	125	116	127	100	140	221	223	117	410
chr1_3550903_hg38	chr1	3549905	3551901	19	10	30	34	8	32	36	8	22	68	24	31	36	12	23	27	3	29	19	13	1	23	8	35	26	35	20	20	21	35	42	25	25	44	24	20	60	26	39	60	10	14	21	22	4	26
chr1_3598827_hg38	chr1	3597054	3600600	66	28	130	184	27	264	175	51	167	254	172	144	154	47	180	111	28	148	146	68	14	69	15	157	44	73	52	38	85	84	102	71	68	92	59	66	101	81	58	67	49	94	165	246	136	461
chr1_3602454_hg38	chr1	3601387	3603520	13	9	34	22	5	41	100	17	68	36	22	24	69	26	100	22	3	44	23	24	3	19	6	37	8	20	21	18	23	23	25	19	22	29	16	21	23	19	11	13	9	17	31	49	22	93
chr1_3631028_hg38	chr1	3629547	3632509	50	28	69	76	33	78	64	31	59	136	83	63	75	38	55	63	35	41	226	122	22	34	8	50	19	52	54	160	42	82	52	33	44	78	29	44	65	51	35	49	52	42	61	50	25	70
chr1_3651595_hg38	chr1	3648655	3654535	101	40	157	198	29	151	186	24	134	234	151	143	186	47	131	157	49	115	750	157	67	101	15	124	46	72	177	210	82	92	90	63	63	67	64	58	77	65	60	61	55	45	63	105	57	161
chr1_3673938_hg38	chr1	3672506	3675370	12	11	21	36	3	42	26	10	27	39	29	17	11	6	28	18	7	16	212	165	50	8	5	23	11	32	66	56	19	22	20	29	19	20	16	14	34	20	19	20	7	4	14	21	4	24
chr1_3703162_hg38	chr1	3702161	3704162	24	12	38	60	17	65	48	15	54	63	58	58	39	23	45	29	4	60	217	108	18	22	5	40	20	38	65	87	31	33	36	13	34	27	16	29	54	31	21	25	9	6	20	29	2	39
chr1_3746452_hg38	chr1	3744587	3748317	157	105	343	307	83	349	262	42	315	394	287	304	344	102	324	266	70	264	521	148	47	171	33	252	83	93	107	131	156	156	139	109	114	90	112	119	157	134	108	158	63	64	97	120	75	176
chr1_3775608_hg38	chr1	3771010	3780206	460	211	957	726	136	786	559	118	679	920	645	660	660	231	522	696	134	741	839	557	98	425	58	747	86	169	126	136	237	312	179	166	197	246	105	125	238	151	115	179	188	161	283	315	133	525
chr1_3789635_hg38	chr1	3787662	3791608	60	27	127	98	22	128	100	47	123	149	114	96	116	44	120	79	32	102	433	262	52	67	18	86	31	76	94	69	86	101	75	60	55	98	50	57	103	79	46	79	58	73	96	107	47	163
chr1_3818910_hg38	chr1	3815526	3822293	86	46	122	67	15	65	89	53	99	66	83	71	110	71	121	87	24	100	956	857	387	69	25	92	29	68	97	117	85	108	74	60	70	96	48	31	107	50	54	58	96	74	150	254	123	386
chr1_3827988_hg38	chr1	3826749	3829228	54	29	63	126	42	76	172	25	101	151	94	76	154	43	82	132	45	79	44	27	8	57	13	53	41	43	14	21	43	48	59	35	79	25	39	27	69	29	51	55	128	143	244	509	308	872
chr1_3834792_hg38	chr1	3833651	3835933	31	23	32	33	36	33	147	32	65	48	56	43	109	56	73	56	5	44	11	13	6	26	9	37	9	22	18	11	15	15	20	19	15	17	9	8	18	8	12	18	53	33	62	151	86	194
chr1_3841779_hg38	chr1	3840779	3842779	27	18	22	48	30	33	72	26	36	66	44	26	58	40	28	47	15	34	10	17	6	19	10	24	35	35	8	11	32	41	40	30	64	21	41	31	51	40	48	39	56	88	122	218	140	408
chr1_3881053_hg38	chr1	3879911	3882195	48	26	105	60	24	94	37	17	50	66	78	71	54	31	43	39	17	64	23	24	2	34	7	50	4	20	10	26	30	19	16	21	26	26	15	13	24	20	9	10	14	21	14	21	9	26
chr1_3890728_hg38	chr1	3889648	3891807	41	51	113	56	53	88	85	34	65	57	96	52	79	61	62	62	32	66	25	31	14	44	18	77	20	32	15	29	47	40	43	17	40	36	34	19	52	32	26	49	48	28	40	43	11	47
chr1_3901245_hg38	chr1	3898369	3904121	219	156	823	271	50	415	330	82	637	396	590	507	352	150	610	355	62	524	764	132	136	250	36	498	102	131	167	139	228	252	212	151	303	122	199	107	171	130	168	137	483	373	489	645	341	1016
chr1_3910757_hg38	chr1	3909737	3911777	82	32	131	30	14	48	29	9	30	34	28	30	37	20	21	33	19	47	19	9	4	47	17	52	16	22	27	10	56	42	33	22	24	32	23	13	26	24	16	24	68	73	100	120	71	240
chr1_4019821_hg38	chr1	4017156	4022486	107	155	515	37	8	40	27	19	23	27	23	14	23	25	21	112	82	155	26	18	13	112	41	197	13	28	89	109	140	202	60	72	76	95	13	19	31	23	17	17	194	121	177	89	46	158
chr1_4108960_hg38	chr1	4107945	4109974	24	44	87	43	8	24	15	8	9	24	27	32	13	12	19	12	40	21	21	19	7	19	11	29	10	16	12	9	41	20	24	14	19	27	12	5	18	16	10	9	38	42	71	52	44	125
chr1_4148231_hg38	chr1	4146726	4149736	29	13	16	70	37	91	37	20	49	47	32	36	53	35	38	23	30	23	10	7	3	18	10	20	21	26	22	15	25	17	44	22	32	25	21	11	28	23	27	52	54	79	100	69	70	141
chr1_4172130_hg38	chr1	4169772	4174488	96	115	324	56	24	68	81	47	77	55	49	56	69	62	52	71	38	91	11	22	5	65	44	132	14	29	37	27	59	44	34	28	30	41	20	16	32	21	20	28	65	42	81	68	36	115
chr1_4266794_hg38	chr1	4264429	4269160	43	56	32	82	80	84	254	101	151	113	103	113	150	117	124	49	48	45	20	8	12	46	29	50	18	29	29	19	33	26	41	28	37	52	25	52	51	38	37	55	14	23	29	22	18	50
chr1_4397619_hg38	chr1	4395194	4400044	54	79	174	104	88	140	230	161	184	123	112	171	156	221	200	114	122	180	12	8	11	151	40	175	19	42	37	19	46	52	55	42	63	71	41	29	84	55	45	48	85	111	167	128	89	304
chr1_4431396_hg38	chr1	4429380	4433411	70	103	106	33	27	29	61	35	19	48	32	40	30	26	25	88	70	113	18	9	4	113	40	161	13	23	24	31	40	51	43	49	58	41	15	10	23	17	21	27	54	55	72	39	19	62
chr1_4511946_hg38	chr1	4508710	4515181	143	164	421	54	30	116	73	38	48	58	67	80	70	38	66	147	96	178	36	17	11	178	66	234	19	36	37	41	119	87	54	51	70	76	27	17	41	36	27	29	89	86	111	53	35	62
chr1_4527952_hg38	chr1	4526836	4529067	31	30	56	13	8	24	35	21	44	8	17	10	32	22	43	30	34	49	8	9	9	40	17	53	2	16	14	21	17	44	20	21	18	24	8	8	11	10	9	11	18	14	15	19	7	50
chr1_4674882_hg38	chr1	4673329	4676436	179	246	368	291	143	231	296	139	416	307	265	281	327	293	378	228	104	283	30	22	11	157	55	280	87	96	26	18	171	191	147	90	147	68	123	70	116	67	109	108	184	118	147	111	61	291
chr1_4685766_hg38	chr1	4679276	4692255	691	969	1434	1224	833	1367	1422	636	1940	1316	1722	1582	1318	1502	1552	1061	814	1189	129	77	55	661	392	1150	439	428	144	106	591	535	758	329	752	324	541	342	685	334	592	522	300	306	533	585	392	1649
chr1_4699280_hg38	chr1	4695439	4703120	369	720	1414	649	311	605	602	325	1074	631	683	737	593	753	973	516	364	893	88	48	25	458	189	917	180	234	63	61	481	421	342	237	282	243	275	163	274	168	215	210	476	309	343	210	117	510
chr1_4711922_hg38	chr1	4708672	4715171	245	326	768	371	179	371	321	192	613	347	283	245	291	407	674	275	173	377	54	47	16	320	110	514	160	228	89	59	358	363	276	212	275	215	286	174	266	195	253	216	336	214	256	115	82	417
chr1_4735562_hg38	chr1	4734509	4736616	66	131	269	78	38	63	75	29	80	62	71	50	49	82	86	79	56	150	24	29	12	77	24	149	48	51	37	29	137	119	91	56	96	65	51	39	59	47	63	54	119	74	92	38	29	118
chr1_4751637_hg38	chr1	4749730	4753544	104	160	175	179	153	248	190	137	273	167	228	225	161	279	228	139	112	151	20	10	17	54	70	140	53	47	24	23	67	49	87	33	78	38	72	45	72	52	80	62	56	45	49	37	25	93
chr1_4770035_hg38	chr1	4769031	4771039	106	82	156	53	33	60	51	31	57	49	49	63	50	43	53	69	27	89	20	16	1	59	18	97	23	39	26	19	97	83	46	34	33	48	50	36	47	31	37	49	59	37	57	36	19	60
chr1_4778482_hg38	chr1	4777259	4779705	47	100	167	62	56	102	86	66	122	67	94	75	91	107	98	88	56	114	16	7	11	72	21	124	55	51	26	13	91	78	95	34	88	47	64	44	44	47	53	74	93	63	92	68	34	145
chr1_4796580_hg38	chr1	4795053	4798106	69	80	126	16	28	56	49	35	70	26	44	56	16	39	55	53	34	112	13	3	4	73	23	105	40	42	19	18	108	87	82	42	68	55	40	28	62	42	55	55	75	51	105	75	32	183
chr1_4801932_hg38	chr1	4800725	4803138	43	44	51	54	45	66	70	57	80	36	73	83	58	78	89	30	39	49	13	4	3	31	40	48	53	42	19	11	39	32	76	30	67	27	44	35	49	31	52	58	36	40	58	124	57	301
chr1_5000871_hg38	chr1	4999873	5001869	18	42	36	4	5	14	13	8	7	2	10	4	6	8	6	13	9	21	12	3	3	21	11	23	5	3	9	11	43	15	13	7	12	17	6	5	7	4	5	1	58	25	23	12	3	10
chr1_5200122_hg38	chr1	5198700	5201544	14	35	64	23	74	127	70	40	107	35	106	124	35	58	113	20	38	84	16	5	4	18	16	44	7	10	11	16	10	13	11	6	12	12	8	17	9	4	9	7	7	5	7	13	7	13
chr1_5222626_hg38	chr1	5220585	5224666	52	138	97	82	146	154	124	67	182	72	156	173	94	193	140	85	80	149	15	4	8	67	48	115	10	19	22	32	32	31	21	20	34	34	13	11	52	23	19	16	50	46	54	28	19	29
chr1_5239938_hg38	chr1	5237681	5242196	34	90	84	53	119	170	74	67	92	59	117	103	49	146	115	86	51	124	20	6	10	70	47	104	37	45	31	24	67	66	66	49	50	44	38	38	76	63	45	50	64	69	74	40	18	70
chr1_5273756_hg38	chr1	5272759	5274754	15	58	44	23	67	74	68	37	51	31	43	58	28	45	53	23	46	42	11	1	4	16	11	37	17	25	14	8	27	31	36	15	34	37	23	19	36	30	35	27	18	29	22	20	8	35
chr1_5295858_hg38	chr1	5292167	5299550	90	183	270	229	232	383	306	225	611	279	360	419	278	389	566	164	181	341	44	34	33	119	67	270	118	95	58	43	122	108	171	87	171	81	110	93	227	112	143	144	60	60	85	101	57	226
chr1_5338280_hg38	chr1	5337071	5339489	11	23	22	29	72	82	75	37	64	25	37	58	40	65	70	29	34	31	11	0	5	9	26	25	59	39	12	13	36	44	66	29	40	32	41	30	90	45	40	54	1	8	11	11	2	11
chr1_5409150_hg38	chr1	5407033	5411268	22	100	48	84	91	105	150	76	202	98	114	142	109	164	198	55	22	75	30	18	18	34	45	47	70	54	32	30	50	52	125	37	105	32	78	52	52	68	78	109	12	17	23	26	24	56
chr1_5414304_hg38	chr1	5413271	5415337	8	24	19	21	12	34	34	22	60	26	25	27	30	48	39	9	3	22	10	11	6	11	6	13	27	24	16	21	26	23	56	15	28	24	24	26	34	29	46	43	8	9	15	14	4	24
chr1_5479814_hg38	chr1	5476290	5483338	91	170	91	148	159	108	179	159	175	143	228	164	136	294	173	105	63	130	224	408	178	87	73	113	115	171	183	174	193	255	190	135	198	149	160	134	214	154	127	190	36	50	64	36	16	89
chr1_5492506_hg38	chr1	5489802	5495209	49	100	72	132	127	202	144	123	161	125	176	204	106	218	164	114	88	141	53	86	53	86	36	91	35	66	36	35	70	54	89	58	64	62	57	44	108	60	64	82	53	46	56	34	17	77
chr1_5505382_hg38	chr1	5497244	5513519	234	336	493	222	116	246	295	231	314	278	242	262	231	369	367	252	198	310	952	1369	630	206	114	320	89	160	377	338	323	267	189	131	171	172	123	81	199	114	113	129	155	130	160	86	54	146
chr1_5593839_hg38	chr1	5592330	5595348	48	86	180	8	8	20	54	28	22	15	16	12	33	38	35	33	25	36	16	6	5	46	12	65	6	13	12	12	69	56	9	12	18	20	11	6	9	7	14	8	39	25	26	7	6	19
chr1_5709823_hg38	chr1	5708823	5710823	10	13	57	17	5	9	15	9	10	11	15	11	14	17	7	15	5	32	7	9	2	39	20	37	2	15	10	10	32	42	14	18	24	21	10	10	5	15	8	9	7	10	9	11	7	13
chr1_5752093_hg38	chr1	5750740	5753446	59	81	78	30	9	38	60	43	19	47	40	18	34	34	48	61	25	62	14	7	9	64	20	81	26	45	25	13	81	45	38	35	46	61	29	18	48	27	24	36	33	29	33	12	15	33
chr1_5769010_hg38	chr1	5765430	5772591	142	64	134	117	23	61	176	82	80	309	87	103	132	91	81	203	34	148	79	52	14	146	39	179	36	90	65	61	105	111	69	66	59	105	52	52	75	73	33	59	42	39	65	55	17	67
chr1_5886518_hg38	chr1	5882151	5890885	234	191	370	124	71	133	214	126	191	280	240	164	205	147	254	196	136	229	81	87	34	154	75	269	62	114	80	50	136	203	127	88	124	105	78	75	107	89	58	85	131	81	142	66	25	84
chr1_5907876_hg38	chr1	5904688	5911065	171	215	371	70	33	70	88	60	71	130	104	89	93	72	95	127	54	157	255	281	87	135	35	156	39	76	121	131	243	138	113	64	107	116	66	47	116	61	39	52	105	82	106	66	41	89
chr1_5915262_hg38	chr1	5912755	5917769	117	168	253	154	100	272	201	130	243	195	262	264	187	195	282	171	65	249	81	80	38	119	54	236	79	105	99	108	146	135	167	91	135	99	113	79	205	104	113	150	100	66	92	55	29	87
chr1_5936906_hg38	chr1	5933148	5940663	198	186	226	211	190	286	272	150	264	237	281	213	214	301	216	270	152	326	49	39	22	234	90	344	84	87	51	37	139	165	175	88	163	99	103	82	185	88	101	139	167	132	178	59	30	62
chr1_5974594_hg38	chr1	5972804	5976384	105	102	203	119	50	188	144	84	205	130	172	163	110	110	178	132	123	203	59	66	42	139	38	217	48	79	56	43	123	108	119	50	112	69	71	48	96	52	88	90	122	74	118	44	22	62
chr1_5985685_hg38	chr1	5984559	5986811	71	82	151	16	18	15	65	20	23	32	29	22	33	41	50	42	14	78	396	323	88	63	10	74	12	21	109	131	39	25	17	15	19	26	22	10	15	16	12	15	35	19	29	18	13	33
chr1_5995434_hg38	chr1	5989925	6000942	580	488	1625	312	62	281	518	148	560	458	317	307	498	225	676	546	180	731	1154	620	226	528	107	752	111	228	390	246	514	634	242	269	323	289	250	133	187	155	115	135	592	386	544	250	139	402
chr1_6002411_hg38	chr1	6001200	6003622	90	97	265	50	9	61	44	38	73	90	51	50	64	48	69	108	34	140	268	214	52	79	31	130	14	22	44	26	69	79	22	37	39	42	31	22	18	11	9	20	99	67	86	45	18	65
chr1_6026454_hg38	chr1	6024897	6028012	130	86	594	49	14	90	93	38	116	122	124	87	102	47	111	122	50	172	156	110	51	107	21	191	18	48	62	36	153	135	50	56	57	99	52	46	38	39	19	33	181	129	182	171	104	329
chr1_6083874_hg38	chr1	6079118	6088630	414	485	1401	102	46	154	257	95	285	262	173	217	256	164	380	437	178	732	273	361	94	494	110	847	64	151	141	114	488	524	203	215	230	219	137	74	137	99	84	105	635	430	546	137	85	191
chr1_6145286_hg38	chr1	6141558	6149013	322	429	1245	46	15	69	56	17	49	82	82	72	46	31	51	288	160	456	101	72	13	280	71	604	24	49	62	47	320	323	103	103	133	159	37	33	49	35	31	26	314	202	221	57	41	71
chr1_6166586_hg38	chr1	6160504	6172669	689	812	3336	96	24	103	185	53	198	176	279	210	158	97	221	712	309	1205	594	521	189	766	155	1492	35	114	190	154	941	988	283	372	507	443	137	73	89	88	45	61	1496	913	1159	210	137	173
chr1_6179828_hg38	chr1	6177021	6182634	165	149	683	85	11	76	97	29	72	104	92	80	103	34	69	183	59	269	485	225	88	178	47	293	11	39	77	88	131	159	54	65	58	95	27	15	28	22	21	23	152	92	133	42	33	42
chr1_6199770_hg38	chr1	6198146	6201395	165	79	382	160	46	184	305	67	245	295	212	258	273	125	264	239	65	232	600	149	100	199	26	200	80	93	100	77	114	139	115	108	121	79	104	76	99	102	84	105	133	92	149	139	73	234
chr1_6207985_hg38	chr1	6204934	6211036	182	79	406	145	15	135	177	35	167	190	172	185	145	25	186	204	42	260	1027	388	68	187	29	279	45	95	302	265	192	188	133	117	123	141	87	70	94	87	77	80	180	130	191	75	31	98
chr1_6270676_hg38	chr1	6266202	6275151	285	280	952	243	84	393	272	128	287	376	275	325	246	171	289	304	123	466	141	158	58	253	92	492	80	137	101	74	302	336	167	177	137	198	111	112	185	163	122	174	267	208	294	218	157	393
chr1_6276440_hg38	chr1	6275255	6277625	106	68	181	125	25	127	115	31	100	154	136	117	110	43	109	106	18	132	31	25	12	101	20	149	8	48	33	18	67	99	34	37	41	55	23	23	50	38	25	49	88	68	102	54	38	86
chr1_6285881_hg38	chr1	6284519	6287243	61	54	125	24	14	52	37	16	34	50	31	36	39	22	24	61	18	78	134	118	51	44	10	84	16	37	50	57	52	50	35	26	28	44	23	12	28	24	12	19	44	39	55	31	22	50
chr1_6291624_hg38	chr1	6290078	6293170	77	66	111	135	81	149	137	69	127	175	132	128	134	155	92	88	51	94	29	61	19	56	30	75	37	49	31	21	71	48	57	33	56	51	46	42	65	58	40	77	38	58	66	59	34	109
chr1_6314869_hg38	chr1	6313708	6316030	23	14	32	15	11	21	43	14	15	27	33	26	20	32	17	23	7	32	19	29	4	22	9	33	17	35	29	35	48	73	36	53	35	85	15	28	31	49	22	34	34	20	30	18	12	34
chr1_6333791_hg38	chr1	6328018	6339564	323	370	803	229	71	236	266	109	227	275	362	332	225	182	265	403	135	511	928	1073	274	406	122	498	66	132	140	179	416	353	164	176	194	241	105	89	162	145	84	108	477	265	323	127	79	209
chr1_6354776_hg38	chr1	6353170	6356383	68	67	165	66	33	145	52	25	63	96	91	89	60	53	78	68	55	99	138	193	90	47	25	84	25	36	58	31	83	61	63	42	50	65	33	29	85	61	31	52	36	35	50	42	24	76
chr1_6359120_hg38	chr1	6357532	6360709	109	73	423	77	26	143	91	45	107	157	126	140	102	53	138	113	69	142	70	77	49	104	30	187	28	79	49	38	132	99	91	65	62	82	38	39	73	55	41	44	56	79	109	54	33	92
chr1_6437724_hg38	chr1	6436555	6438894	59	40	181	43	31	104	66	40	68	51	50	51	64	43	92	46	15	109	94	38	32	45	15	67	23	41	29	17	55	45	33	32	35	33	42	27	46	24	26	49	24	14	10	17	11	27
chr1_6492734_hg38	chr1	6481525	6503944	835	533	2060	536	151	606	620	292	608	897	761	658	695	258	715	891	323	1180	6273	3192	802	899	201	1272	149	408	1289	957	685	761	422	417	496	544	319	234	448	317	208	261	623	441	590	239	141	339
chr1_6507800_hg38	chr1	6504560	6511040	254	172	419	153	33	190	213	84	130	302	261	158	169	88	168	319	79	317	1369	847	168	287	69	384	90	154	276	242	187	238	199	167	202	184	113	80	223	103	129	119	162	185	170	85	56	133
chr1_6554694_hg38	chr1	6553058	6556331	158	72	285	245	46	284	258	63	301	311	272	279	248	106	267	221	23	225	501	198	73	167	31	215	81	126	107	78	132	127	142	76	101	105	111	68	120	90	100	126	57	51	85	60	42	134
chr1_6586989_hg38	chr1	6584701	6589277	176	105	330	251	55	308	256	90	274	312	259	271	259	160	277	260	69	270	592	381	97	178	47	274	107	145	154	105	210	229	195	140	188	144	111	120	244	169	171	219	108	100	142	136	75	231
chr1_6591714_hg38	chr1	6590583	6592845	63	40	111	95	30	116	113	56	107	160	115	88	91	72	88	104	28	95	62	58	22	65	24	111	44	89	59	35	88	91	93	53	58	63	58	46	90	77	81	86	94	67	105	101	64	125
chr1_6602285_hg38	chr1	6598640	6605930	402	324	1606	623	176	1232	844	264	1416	897	1232	1328	961	507	1520	876	238	1126	805	288	76	668	102	1075	233	314	203	154	388	491	451	329	580	261	410	261	511	312	402	287	326	287	333	484	258	950
chr1_6614390_hg38	chr1	6610935	6617844	300	99	593	424	65	473	527	102	510	708	509	417	589	250	508	568	55	413	742	226	119	423	47	406	134	170	126	90	186	245	202	178	245	150	205	144	264	165	208	188	114	85	124	152	86	300
chr1_6625314_hg38	chr1	6623726	6626901	155	86	340	213	54	310	282	73	317	283	320	283	269	127	330	265	77	248	559	153	47	183	23	305	78	123	85	86	130	199	165	144	166	135	141	121	174	106	126	157	135	112	108	184	101	336
chr1_6632950_hg38	chr1	6631861	6634038	32	22	54	43	10	33	42	13	30	42	35	33	30	16	24	30	4	33	50	38	7	34	6	33	7	32	67	66	25	48	19	29	28	35	21	19	39	25	18	36	31	33	62	45	29	74
chr1_6666850_hg38	chr1	6664863	6668838	54	56	59	34	22	38	53	19	34	36	42	35	23	33	31	62	21	75	58	23	27	69	25	90	56	80	41	32	74	92	106	68	108	80	84	68	122	80	109	122	31	25	21	25	8	31
chr1_6683524_hg38	chr1	6682528	6684520	16	12	23	19	20	32	31	7	23	20	25	16	20	15	39	11	5	30	18	12	8	16	10	21	23	40	26	20	25	37	38	27	32	17	24	29	36	39	36	57	14	10	12	13	5	14
chr1_6701634_hg38	chr1	6700389	6702880	116	43	251	122	17	187	106	38	144	169	190	170	190	39	191	153	37	177	270	44	27	116	20	164	55	73	45	35	100	132	93	72	79	76	71	53	91	74	58	89	49	32	70	55	28	124
chr1_6789014_hg38	chr1	6787857	6790172	24	26	64	9	15	36	50	34	63	24	83	48	35	45	37	22	50	44	32	18	35	47	9	54	7	38	25	30	37	35	31	22	17	27	24	11	46	28	11	27	22	16	33	27	19	41
chr1_6868720_hg38	chr1	6866807	6870633	16	80	91	44	79	108	178	120	120	59	114	128	73	102	115	52	57	88	25	25	18	102	33	98	23	45	28	21	41	29	64	27	45	33	46	31	50	34	44	47	32	27	39	26	16	31
chr1_6916376_hg38	chr1	6914684	6918067	81	111	170	61	20	63	121	48	97	121	126	142	81	57	141	129	34	130	31	30	23	114	30	151	19	68	44	30	81	67	33	51	38	63	32	21	59	42	19	39	56	55	61	57	44	104
chr1_6923882_hg38	chr1	6921484	6926281	149	185	358	71	39	112	169	123	128	201	168	163	134	87	134	211	70	208	94	132	69	149	39	214	31	68	108	59	145	116	86	82	89	97	57	32	98	57	30	42	99	71	82	58	35	94
chr1_6950028_hg38	chr1	6948422	6951634	47	47	88	38	17	52	116	43	89	51	46	59	68	58	98	47	12	74	323	206	94	39	23	56	11	34	145	151	49	61	42	37	35	54	13	18	31	30	9	18	39	41	50	24	15	52
chr1_6955897_hg38	chr1	6953704	6958090	89	59	106	151	64	165	179	76	138	190	143	137	167	108	123	148	70	142	40	75	50	73	24	125	40	57	43	35	54	61	65	52	63	55	40	34	82	62	51	62	37	38	71	49	29	65
chr1_6975697_hg38	chr1	6974192	6977202	36	40	57	84	53	88	93	49	84	75	52	99	59	64	75	64	47	68	25	12	16	42	13	69	14	26	34	20	23	22	20	28	19	33	19	17	23	16	22	30	37	35	43	49	31	57
chr1_7011459_hg38	chr1	7007519	7015399	210	159	378	74	19	74	84	53	74	79	94	78	81	51	75	107	68	149	286	398	204	85	34	117	31	73	129	80	188	174	98	97	88	106	53	42	91	61	46	44	155	105	217	183	70	234
chr1_7042550_hg38	chr1	7040003	7045096	91	137	252	38	22	67	93	52	95	131	140	100	96	45	111	119	20	143	201	219	84	80	25	115	16	44	150	66	124	78	63	52	66	50	37	23	50	38	30	28	142	125	160	117	43	191
chr1_7051757_hg38	chr1	7049626	7053888	70	50	111	48	17	55	74	35	44	219	111	76	89	42	47	94	53	83	47	34	16	55	32	60	22	38	48	31	68	77	45	41	51	47	25	26	50	39	23	33	91	99	162	95	59	182
chr1_7070124_hg38	chr1	7068983	7071265	42	38	65	53	14	52	68	24	57	52	74	50	44	34	69	52	9	64	23	32	6	46	3	51	27	34	26	25	61	51	48	37	35	35	30	19	55	41	35	37	24	33	65	48	10	68
chr1_7121945_hg38	chr1	7120893	7122997	41	24	55	47	15	64	32	24	37	46	49	75	31	14	57	34	38	45	56	36	36	27	15	50	10	26	29	16	26	18	16	16	19	28	7	12	20	18	15	12	4	12	31	19	8	24
chr1_7150234_hg38	chr1	7148010	7152459	96	52	152	49	10	53	103	41	94	185	80	117	83	51	88	126	32	162	113	150	73	104	31	146	12	53	65	44	69	71	46	39	43	76	29	22	41	53	21	28	119	79	108	53	37	118
chr1_7164676_hg38	chr1	7163678	7165675	21	46	41	13	16	22	53	11	17	20	21	17	28	16	27	19	8	30	16	33	25	29	12	22	10	26	19	26	26	27	27	13	22	23	25	9	20	23	14	29	15	19	15	14	8	15
chr1_7172640_hg38	chr1	7170393	7174888	130	201	333	74	75	74	77	36	75	85	103	100	50	48	54	124	78	169	145	150	80	86	29	126	13	48	104	79	82	68	51	33	35	37	19	24	43	26	20	34	99	83	95	25	25	50
chr1_7248316_hg38	chr1	7246969	7249663	28	34	54	42	71	119	69	47	75	38	61	74	32	39	71	33	63	49	31	24	16	23	15	44	34	37	30	14	29	27	62	30	42	26	29	38	45	44	46	54	21	32	49	47	26	124
chr1_7279402_hg38	chr1	7278077	7280727	24	17	21	15	8	38	13	13	16	8	12	14	12	13	16	10	1	15	99	96	44	13	9	10	1	12	112	110	20	18	12	7	12	14	7	1	22	11	12	15	9	19	18	18	13	38
chr1_7292639_hg38	chr1	7290000	7295278	77	111	215	52	61	119	67	29	102	68	75	102	48	54	94	63	58	120	117	79	87	56	23	103	35	53	210	166	116	99	69	50	73	47	29	31	64	59	38	35	39	40	68	47	36	121
chr1_7300181_hg38	chr1	7297961	7302401	52	107	209	61	81	197	102	67	118	61	110	162	60	67	158	62	51	139	26	57	27	57	31	95	33	37	64	41	69	53	59	39	63	40	31	30	44	31	42	29	41	37	106	86	50	219
chr1_7313622_hg38	chr1	7312215	7315030	28	46	46	33	62	92	70	34	45	25	50	50	30	44	50	32	34	51	21	6	16	27	18	38	21	25	24	17	30	30	46	16	31	26	10	25	25	27	13	46	24	24	38	32	17	62
chr1_7341843_hg38	chr1	7340358	7343328	64	57	125	36	33	85	28	16	42	41	35	47	37	24	36	48	32	63	44	48	42	28	17	63	14	7	29	16	26	30	26	7	17	21	8	9	12	13	14	21	45	43	109	123	56	309
chr1_7373742_hg38	chr1	7371803	7375680	79	61	122	90	97	276	103	64	112	97	93	143	54	65	114	69	39	107	56	66	43	60	17	97	39	41	40	33	64	37	57	24	60	40	27	28	46	43	51	50	49	56	121	148	94	411
chr1_7402458_hg38	chr1	7401430	7403486	25	58	68	3	9	18	34	25	46	18	14	11	21	10	23	12	28	21	13	5	4	6	6	27	7	15	20	8	38	14	18	15	14	16	8	8	10	2	3	6	18	12	25	18	7	27
chr1_7455164_hg38	chr1	7451748	7458581	120	94	183	113	60	191	114	63	119	182	122	161	101	87	121	82	59	124	681	616	154	91	28	96	40	98	281	270	143	120	112	85	100	77	63	44	124	83	55	78	91	66	128	106	54	220
chr1_7478910_hg38	chr1	7476083	7481737	119	176	239	266	219	460	236	164	385	212	409	330	244	318	312	195	152	250	72	117	68	78	58	201	88	89	96	54	108	100	165	73	133	76	84	77	179	117	121	169	51	60	137	234	104	384
chr1_7560164_hg38	chr1	7557545	7562784	130	68	227	79	16	83	73	25	54	131	100	82	64	38	57	75	32	129	226	253	87	50	21	75	24	55	120	67	158	123	67	67	60	95	40	39	74	81	36	67	46	51	115	65	35	140
chr1_7574516_hg38	chr1	7573505	7575527	15	20	26	20	6	24	22	15	22	39	24	23	30	15	19	24	6	21	88	90	33	21	10	15	10	18	53	22	37	29	21	15	18	27	15	14	33	11	13	19	11	15	28	8	13	25
chr1_7633244_hg38	chr1	7627963	7638524	179	127	197	171	81	158	134	100	124	178	128	145	144	121	122	153	44	178	854	1134	371	103	57	155	35	88	423	275	151	116	80	53	92	108	58	47	95	78	56	81	74	66	105	71	50	127
chr1_7670568_hg38	chr1	7666921	7674215	636	541	1688	556	126	1264	440	189	945	647	749	846	497	328	945	788	235	1018	2127	1213	311	571	142	1037	194	212	546	522	557	613	457	308	467	297	316	157	317	214	312	289	551	461	558	460	242	967
chr1_7680411_hg38	chr1	7677882	7682940	421	206	734	385	59	580	352	83	434	481	432	401	427	162	449	486	81	467	1359	426	113	327	49	474	77	109	274	241	303	322	209	191	248	168	171	122	146	128	132	140	365	207	289	308	153	480
chr1_7704116_hg38	chr1	7701337	7706895	164	173	462	286	127	713	332	123	390	354	406	321	390	189	390	324	37	310	636	275	125	227	54	309	124	166	181	128	189	210	225	124	238	113	170	163	241	169	213	192	91	80	109	207	104	325
chr1_7728141_hg38	chr1	7726785	7729497	69	151	171	74	107	194	169	65	129	65	173	154	95	164	140	87	118	141	259	231	80	114	47	134	57	62	77	49	86	91	110	46	98	42	53	55	106	53	80	100	145	91	153	312	158	458
chr1_7754292_hg38	chr1	7751497	7757087	45	279	240	72	167	269	213	170	165	95	209	175	100	168	170	127	167	156	101	63	46	151	56	185	122	102	80	49	148	131	204	76	184	66	128	79	165	104	191	164	124	113	155	324	141	429
chr1_7760208_hg38	chr1	7758319	7762098	31	179	160	49	106	139	181	106	95	43	120	96	75	99	110	68	59	120	52	58	19	90	47	128	85	75	49	31	107	104	128	55	157	51	93	67	124	75	116	152	108	90	86	202	94	266
chr1_7771374_hg38	chr1	7769749	7773000	157	158	373	213	61	375	376	77	279	343	323	255	301	142	284	264	64	254	449	107	53	221	50	223	64	83	45	32	98	115	100	85	99	74	84	62	109	113	78	116	101	58	96	136	64	233
chr1_7783502_hg38	chr1	7780262	7786742	213	234	475	318	138	544	490	161	376	412	440	348	410	251	350	363	144	347	1308	442	187	307	71	346	125	181	174	165	194	272	210	163	200	155	174	153	251	175	199	210	288	180	294	387	203	617
chr1_7902645_hg38	chr1	7901490	7903800	33	48	56	54	23	93	49	26	42	44	42	45	36	39	55	37	14	35	23	4	11	30	21	39	21	22	18	12	30	13	23	10	8	18	24	2	22	9	23	32	24	15	18	21	9	31
chr1_7942586_hg38	chr1	7941406	7943767	97	64	152	55	36	95	103	53	97	96	124	92	79	67	114	74	82	123	66	30	29	91	54	111	19	39	49	48	64	56	39	38	37	45	34	22	37	26	33	38	24	31	32	26	14	35
chr1_7964253_hg38	chr1	7959669	7968837	251	405	753	193	114	354	413	120	305	256	329	317	342	163	367	292	118	373	1517	665	269	283	57	358	97	146	303	197	239	239	208	136	182	141	147	111	207	116	142	161	212	135	197	189	126	319
chr1_7970856_hg38	chr1	7969423	7972288	54	45	68	32	31	53	80	28	33	44	47	44	37	32	28	71	25	68	274	180	54	71	11	76	38	43	62	31	64	62	60	32	71	43	45	37	71	45	64	65	38	47	36	49	19	62
chr1_7976806_hg38	chr1	7975125	7978486	35	83	89	21	24	74	104	48	58	44	60	46	49	38	61	49	27	72	208	157	123	75	14	65	16	24	43	32	60	49	41	22	35	29	30	18	42	30	31	39	33	35	40	53	24	77
chr1_8016714_hg38	chr1	8012969	8020459	57	306	391	74	299	328	427	332	414	124	350	332	194	338	407	177	234	332	298	173	174	282	110	317	168	169	142	88	188	200	278	143	260	100	177	128	293	142	201	228	327	289	303	450	250	536
chr1_8024911_hg38	chr1	8020719	8029103	226	214	669	336	250	624	656	190	647	527	603	626	570	387	614	466	200	526	1023	499	334	418	103	476	204	202	272	210	284	319	326	207	315	192	230	196	321	216	251	225	206	193	239	324	191	468
chr1_8121320_hg38	chr1	8119877	8122762	32	38	70	43	48	122	102	65	69	56	86	95	50	62	76	41	18	61	31	71	81	68	21	55	26	41	22	23	41	33	50	34	28	30	25	25	51	39	29	34	8	16	19	10	10	47
chr1_8135972_hg38	chr1	8132298	8139647	50	71	107	55	74	229	94	53	108	52	71	117	65	63	99	40	36	90	412	405	345	57	42	83	31	57	121	150	55	50	72	40	56	57	39	39	92	62	66	59	25	27	39	36	10	75
chr1_8166666_hg38	chr1	8160469	8172862	196	215	324	133	89	286	180	108	147	171	136	187	166	139	190	190	195	212	3014	1821	988	205	98	218	46	88	832	758	110	134	103	76	88	108	58	60	108	70	70	90	65	54	101	101	48	174
chr1_8202355_hg38	chr1	8199735	8204975	252	286	468	33	30	68	136	65	78	70	95	40	132	83	128	131	78	156	1263	1221	507	184	58	179	19	38	520	626	121	96	56	41	56	78	34	29	57	45	21	30	67	62	49	16	22	44
chr1_8238518_hg38	chr1	8237479	8239558	18	12	30	6	14	18	15	12	12	21	15	14	17	14	17	9	3	18	21	22	55	18	11	13	10	22	21	13	22	20	12	15	9	18	9	12	15	17	17	15	12	13	12	7	2	13
chr1_8282364_hg38	chr1	8281178	8283549	6	21	28	41	41	74	33	38	29	47	52	45	32	30	33	30	24	33	21	56	46	24	25	35	31	47	27	23	49	31	51	29	39	37	38	30	102	39	42	60	28	23	25	18	12	24
chr1_8302344_hg38	chr1	8301063	8303624	12	20	44	18	48	44	88	55	34	27	38	39	20	24	41	35	38	31	35	20	26	50	26	46	13	43	21	21	28	27	25	18	18	21	9	15	41	22	18	28	22	36	40	29	20	66
chr1_8315799_hg38	chr1	8311768	8319830	249	222	471	324	67	385	303	120	319	466	328	343	386	225	348	339	105	311	1087	733	423	261	56	336	88	118	270	177	178	174	172	133	159	128	140	104	200	135	127	140	160	148	217	167	101	321
chr1_8354897_hg38	chr1	8347901	8361893	549	404	1118	563	233	805	717	290	841	848	804	687	689	469	868	761	239	809	2263	1354	286	613	170	821	261	489	608	425	543	786	533	483	495	476	339	404	665	492	335	530	436	362	497	431	191	728
chr1_8364060_hg38	chr1	8362738	8365382	116	84	192	151	67	180	192	86	168	213	183	153	173	125	176	139	96	168	167	142	56	121	37	172	56	124	69	35	97	121	120	103	119	81	81	78	131	90	89	110	143	127	150	125	67	254
chr1_8373464_hg38	chr1	8369412	8377517	232	505	909	202	237	508	552	319	616	255	450	570	332	505	682	393	335	623	1297	907	496	449	164	593	170	310	309	292	372	398	349	259	328	226	229	234	406	236	207	366	476	315	411	293	188	491
chr1_8379264_hg38	chr1	8377530	8380999	119	141	251	120	56	193	203	99	186	161	186	214	148	158	204	170	113	200	287	328	147	179	54	228	61	126	72	46	94	135	106	80	96	90	64	56	123	69	70	80	110	75	117	107	57	152
chr1_8382244_hg38	chr1	8381164	8383324	42	94	147	40	74	170	147	73	132	64	105	163	72	106	168	112	57	126	238	147	84	99	23	127	30	50	38	53	43	59	70	57	61	41	40	34	73	61	44	59	64	41	61	42	22	90
chr1_8408610_hg38	chr1	8407124	8410096	67	178	354	37	101	210	276	139	257	68	179	228	113	88	295	154	96	218	106	67	35	209	63	244	82	115	55	20	147	108	123	123	108	89	99	77	154	125	100	114	136	111	169	126	74	240
chr1_8425864_hg38	chr1	8420928	8430801	348	732	1367	279	331	610	693	505	814	411	783	713	504	532	959	550	480	948	1562	1068	501	710	210	946	186	301	479	374	435	468	338	304	377	301	254	223	446	289	261	284	574	370	473	375	188	648
chr1_8449700_hg38	chr1	8447879	8451521	95	122	196	84	91	157	216	161	181	107	164	129	145	225	205	130	108	189	138	79	73	126	50	161	38	59	32	26	31	61	47	29	44	53	23	32	64	40	46	51	90	101	155	88	86	228
chr1_8464302_hg38	chr1	8461472	8467133	172	287	423	139	254	373	497	303	457	255	459	445	267	393	486	271	293	383	420	407	240	333	155	466	157	253	117	108	194	258	288	203	250	183	202	177	360	231	242	270	209	214	275	269	148	454
chr1_8476366_hg38	chr1	8475365	8477366	26	59	68	29	45	74	97	41	62	40	75	72	46	52	67	35	11	53	48	21	17	67	17	60	41	30	27	28	35	47	64	33	51	26	41	38	99	37	47	66	52	47	67	87	50	150
chr1_8507174_hg38	chr1	8506075	8508273	48	69	93	60	51	85	147	65	107	64	65	80	108	94	74	99	37	65	54	41	30	94	44	103	55	51	28	22	73	76	69	50	77	37	52	50	109	69	69	105	48	34	61	70	38	104
chr1_8510934_hg38	chr1	8508623	8513245	104	159	258	104	127	159	316	204	219	110	201	173	203	246	238	179	106	204	79	90	55	191	78	218	47	83	25	26	51	62	87	55	84	51	53	50	139	59	54	108	135	139	151	129	77	192
chr1_8517344_hg38	chr1	8514550	8520137	127	298	230	136	322	262	475	261	372	169	329	284	274	409	316	235	144	309	120	63	169	273	113	294	189	206	82	81	195	237	306	151	386	103	194	183	325	191	293	278	210	163	246	364	184	497
chr1_8524884_hg38	chr1	8522928	8526839	72	210	323	110	190	287	327	220	345	104	350	326	180	255	385	232	143	319	451	192	122	220	108	318	137	154	164	125	184	196	237	147	275	112	171	110	237	145	209	189	252	191	229	341	157	470
chr1_8552726_hg38	chr1	8551353	8554098	43	75	85	80	120	172	180	101	160	115	130	123	118	125	146	110	65	112	25	42	28	81	48	86	59	68	33	20	61	55	68	50	67	39	61	62	105	65	51	109	39	51	69	151	73	215
chr1_8598394_hg38	chr1	8595757	8601032	96	268	380	84	238	337	302	183	270	97	259	254	134	278	275	163	158	268	390	393	159	231	91	280	131	145	202	181	210	191	248	128	207	91	146	118	186	101	195	220	51	99	82	132	99	212
chr1_8630276_hg38	chr1	8625772	8634781	98	525	368	122	602	559	709	435	729	165	603	635	256	467	613	259	267	472	581	338	316	294	179	468	212	175	125	99	203	182	318	118	322	108	232	162	278	181	318	309	136	140	237	353	198	545
chr1_8639243_hg38	chr1	8638178	8640308	8	91	79	14	69	56	72	40	42	22	31	37	32	55	32	27	22	49	101	122	72	28	23	71	12	17	18	22	26	13	30	12	26	6	7	16	28	18	18	18	29	28	36	40	25	54
chr1_8652201_hg38	chr1	8650468	8653934	74	181	134	36	153	165	197	105	114	45	111	93	85	118	99	87	84	118	58	40	33	126	42	117	27	47	22	14	86	78	67	51	63	54	43	36	77	50	62	82	52	49	50	44	39	71
chr1_8660992_hg38	chr1	8659548	8662437	51	198	206	48	116	160	175	129	163	68	132	142	96	123	162	79	142	128	98	68	63	135	59	130	58	50	55	36	110	77	94	67	70	70	51	48	115	54	72	91	78	67	99	93	47	147
chr1_8664140_hg38	chr1	8662890	8665390	41	101	110	33	105	135	116	108	119	49	101	96	53	65	135	56	98	87	39	34	54	82	83	101	19	23	14	10	32	31	43	21	27	22	24	13	48	42	20	49	28	23	33	25	15	49
chr1_8680672_hg38	chr1	8679372	8681973	18	111	115	41	125	147	163	98	103	42	94	95	25	33	117	42	56	123	33	42	35	88	48	120	34	39	18	18	47	49	66	31	37	41	35	28	80	43	46	83	21	29	30	44	13	39
chr1_8687024_hg38	chr1	8685923	8688125	28	78	104	41	78	111	116	67	86	47	69	67	72	75	78	48	37	75	29	23	29	71	28	80	33	24	14	18	40	29	38	25	37	32	24	16	43	30	22	54	28	15	40	28	28	54
chr1_8703102_hg38	chr1	8700155	8706050	100	312	366	116	205	375	335	205	360	141	397	313	211	325	382	198	198	339	229	193	130	251	107	323	90	90	57	40	138	110	132	76	142	68	89	70	181	91	147	129	185	126	184	218	145	336
chr1_8712592_hg38	chr1	8711418	8713765	12	105	69	13	80	70	132	87	53	25	66	45	42	48	73	20	62	60	42	24	29	74	26	90	9	37	15	11	34	41	28	30	31	21	19	16	32	30	21	20	54	25	40	55	18	49
chr1_8727151_hg38	chr1	8726014	8728288	32	59	59	48	64	91	80	77	86	57	83	77	99	86	85	44	24	62	72	78	43	32	18	71	22	46	26	18	39	34	47	29	34	27	25	31	84	48	45	38	41	37	42	60	32	90
chr1_8739290_hg38	chr1	8737518	8741062	21	71	93	28	79	163	66	53	129	23	59	90	43	70	139	32	46	69	32	21	10	24	20	71	19	15	20	24	32	36	41	21	30	24	20	22	43	28	23	36	35	38	42	59	25	78
chr1_8781131_hg38	chr1	8779167	8783095	34	61	64	30	66	64	104	61	57	29	61	46	52	65	68	33	44	51	172	138	77	44	28	42	15	46	96	34	29	36	39	34	32	28	28	22	45	33	36	59	59	46	55	83	43	131
chr1_8810864_hg38	chr1	8809014	8812715	45	72	68	74	115	147	146	89	139	53	66	100	91	155	140	69	58	87	39	14	115	63	24	69	42	54	33	22	63	41	78	42	45	57	44	32	91	50	38	68	29	37	61	97	38	166
chr1_8848180_hg38	chr1	8846315	8850046	90	78	183	148	98	283	147	77	252	156	185	213	184	146	232	137	64	188	209	126	88	90	48	175	63	61	51	40	50	72	101	64	63	73	60	54	137	70	64	101	47	62	97	137	100	301
chr1_8875536_hg38	chr1	8869633	8881439	322	445	1419	355	306	1003	755	489	1001	531	864	858	542	514	1214	558	205	889	666	161	139	596	158	916	186	327	166	124	402	451	375	327	387	328	273	211	346	272	267	415	392	299	439	518	276	994
chr1_8943280_hg38	chr1	8937968	8948593	253	480	491	543	507	1123	925	465	1288	589	825	1173	812	956	1129	458	383	579	111	66	78	398	235	561	252	241	84	68	189	214	304	151	312	141	194	183	424	190	268	358	238	254	452	641	420	1178
chr1_9004955_hg38	chr1	9003766	9006144	22	29	29	44	33	78	65	44	76	51	36	63	53	55	71	31	8	33	13	6	2	23	13	33	18	37	15	16	27	30	36	23	15	33	23	16	22	28	36	42	25	28	55	78	22	134
chr1_9068806_hg38	chr1	9064536	9073075	114	154	175	114	108	273	220	197	173	249	349	277	205	163	206	218	160	190	65	41	20	211	91	193	64	190	64	49	94	140	107	136	125	127	98	77	162	138	76	94	92	129	169	160	90	316
chr1_9150191_hg38	chr1	9149196	9151186	39	33	90	25	14	44	54	48	54	44	47	54	47	86	60	51	16	53	10	10	3	46	30	42	12	41	14	8	23	28	33	18	19	34	17	16	26	30	14	12	16	21	27	30	15	58
chr1_9164706_hg38	chr1	9161589	9167824	164	187	281	113	110	267	296	196	279	298	333	269	361	388	316	232	189	227	37	42	12	171	121	275	45	182	69	52	120	122	117	131	121	137	86	87	155	152	55	94	37	44	77	66	44	139
chr1_9181994_hg38	chr1	9179912	9184077	122	100	388	133	68	348	262	96	314	268	341	295	276	138	399	206	73	265	48	31	10	189	45	262	1	3	1	1	2	4	4	0	3	0	1	2	2	2	1	2	60	32	58	84	33	113
chr1_9198870_hg38	chr1	9195036	9202703	315	491	1021	133	86	281	207	153	301	201	254	245	235	254	352	261	138	448	63	34	34	232	77	389	2	4	5	2	5	6	5	7	3	3	1	2	1	3	4	1	365	197	238	103	67	205
chr1_9268482_hg38	chr1	9266025	9270940	107	133	266	182	128	290	187	94	272	182	219	257	208	242	257	148	77	171	726	256	170	86	45	176	142	122	143	89	165	146	246	104	190	107	165	93	208	133	191	195	213	146	291	346	174	761
chr1_9318292_hg38	chr1	9317302	9319282	71	72	139	127	56	190	121	43	137	106	154	141	120	135	127	90	54	72	24	15	4	36	14	76	73	82	19	16	76	78	116	78	90	75	74	89	135	92	104	130	21	23	35	43	41	107
chr1_9324084_hg38	chr1	9320608	9327560	234	255	418	575	253	962	523	253	761	734	753	668	641	632	682	462	248	463	69	33	28	250	110	384	285	363	105	60	322	300	534	262	487	165	304	378	542	318	409	485	131	172	312	478	276	1049
chr1_9339163_hg38	chr1	9337172	9341154	124	80	160	356	117	372	312	115	284	356	324	309	346	260	269	186	71	176	33	14	6	93	38	116	199	266	74	39	196	211	342	186	269	109	216	266	440	274	296	415	83	104	191	286	163	613
chr1_9346349_hg38	chr1	9345274	9347424	62	62	95	134	104	215	198	107	211	162	201	183	146	218	190	94	53	102	30	17	14	47	36	80	108	104	26	21	105	73	177	67	161	46	110	116	179	114	164	168	56	49	126	165	103	419
chr1_9352176_hg38	chr1	9351172	9353179	83	39	76	166	78	233	168	67	196	191	191	181	172	124	155	98	59	105	13	8	7	44	34	89	70	81	21	19	73	81	128	60	142	42	87	96	167	80	129	119	48	32	62	128	72	259
chr1_9363626_hg38	chr1	9362040	9365213	121	80	251	313	147	371	241	108	509	333	375	349	286	282	615	232	112	343	53	20	15	75	53	221	127	157	43	30	118	122	195	110	251	71	150	136	176	116	178	245	100	94	236	323	199	626
chr1_9376192_hg38	chr1	9374745	9377638	80	89	115	283	134	341	265	121	422	296	268	286	273	347	389	171	128	187	22	21	10	83	55	160	118	113	35	22	109	118	180	88	161	56	119	123	197	101	168	201	79	88	180	255	185	616
chr1_9385851_hg38	chr1	9381688	9390014	280	432	699	831	498	1279	709	369	1829	940	1354	1499	909	1058	1691	596	309	898	84	79	29	281	195	820	431	342	139	68	350	366	687	245	808	162	500	373	525	360	696	640	265	317	589	1017	628	2096
chr1_9392303_hg38	chr1	9391214	9393392	64	80	95	174	99	170	146	71	265	167	163	214	130	228	225	86	88	120	5	10	5	36	42	94	59	56	21	21	62	39	118	43	94	27	74	33	75	40	93	96	48	71	119	194	147	461
chr1_9400108_hg38	chr1	9397057	9403160	251	255	538	690	276	621	640	210	1115	897	848	857	694	601	1013	465	268	489	61	43	21	236	104	471	239	329	104	51	270	287	431	228	517	186	348	277	421	283	377	412	163	159	337	564	323	1136
chr1_9428668_hg38	chr1	9426609	9430726	123	142	269	166	138	272	279	126	314	198	289	282	238	204	272	182	91	218	257	109	130	155	73	204	89	111	67	69	112	130	134	95	143	70	113	64	176	98	121	172	228	179	257	353	197	683
chr1_9439610_hg38	chr1	9436556	9442663	221	397	548	377	329	414	530	317	847	470	606	699	477	700	916	401	247	421	56	30	36	242	137	501	226	238	65	40	247	202	322	153	334	126	224	180	371	159	276	340	378	329	600	970	538	1923
chr1_9532468_hg38	chr1	9530614	9534322	54	86	68	151	97	156	178	101	144	132	178	156	136	140	123	102	91	100	31	13	16	110	37	109	49	74	31	20	53	58	84	36	85	57	56	37	116	49	67	84	47	38	77	92	51	202
chr1_9558673_hg38	chr1	9557670	9559676	37	49	54	23	18	49	88	43	47	40	78	62	32	39	44	42	19	79	34	14	18	53	14	85	17	21	43	20	38	39	46	28	32	22	17	11	43	29	18	30	70	47	38	46	28	65
chr1_9592084_hg38	chr1	9586779	9597388	329	219	632	623	188	925	541	218	773	812	739	701	707	392	728	590	181	620	812	456	159	409	128	681	191	279	182	126	316	369	376	244	314	236	249	216	430	255	298	342	144	140	247	255	153	468
chr1_9606162_hg38	chr1	9604285	9608040	81	41	83	98	23	88	65	42	64	122	85	78	80	68	74	99	17	106	236	141	51	68	17	98	32	81	47	57	62	53	77	48	50	53	39	37	88	55	44	43	41	48	61	57	44	121
chr1_9627322_hg38	chr1	9626156	9628488	47	20	52	75	5	65	67	14	68	53	54	74	61	30	78	36	10	64	82	27	9	30	20	67	13	23	22	15	30	31	32	20	27	35	33	17	37	13	26	36	29	37	36	45	21	66
chr1_9653191_hg38	chr1	9650981	9655401	59	55	183	79	29	156	158	55	183	106	299	161	114	62	211	110	82	186	44	18	4	94	39	174	27	66	43	19	58	77	60	59	65	72	65	29	54	40	52	20	89	66	82	34	18	59
chr1_9689101_hg38	chr1	9686492	9691710	145	82	248	216	60	232	282	82	204	316	248	223	297	131	234	241	74	229	550	233	102	259	56	240	71	103	78	91	116	149	146	103	101	118	76	76	150	104	84	114	166	112	145	79	40	141
chr1_9719498_hg38	chr1	9716137	9722859	134	81	358	153	30	187	166	58	176	218	219	200	171	55	179	208	45	252	406	209	43	166	31	242	38	79	102	106	137	138	89	115	88	131	74	55	112	78	57	71	148	135	178	106	42	160
chr1_9737260_hg38	chr1	9735150	9739369	100	180	219	54	37	73	77	82	108	78	70	79	94	77	120	102	47	122	298	169	88	102	44	170	38	77	122	102	156	156	91	65	92	65	70	53	88	59	56	72	160	118	123	46	31	87
chr1_9755550_hg38	chr1	9754553	9756548	21	52	50	25	35	51	66	47	30	26	46	37	35	46	44	44	48	51	132	128	71	46	31	44	27	36	30	26	42	28	40	31	24	35	20	20	45	26	13	19	57	55	40	39	38	59
chr1_9759172_hg38	chr1	9757941	9760403	61	59	79	93	64	76	139	65	81	92	122	58	150	108	74	110	35	73	122	95	38	86	21	74	14	25	37	29	36	24	31	19	24	24	14	18	30	18	13	18	32	21	17	20	5	19
chr1_9767138_hg38	chr1	9766119	9768157	42	40	71	62	39	79	87	40	55	70	34	50	72	49	76	45	11	53	94	97	61	56	14	60	13	15	15	21	18	32	19	26	23	25	15	15	23	18	19	27	31	36	31	43	22	62
chr1_9779718_hg38	chr1	9777193	9782244	44	63	85	38	38	50	100	44	56	48	38	35	64	64	52	56	11	58	645	549	196	46	18	63	9	34	131	161	47	44	36	26	37	48	26	20	65	35	18	33	75	59	78	52	26	76
chr1_9793639_hg38	chr1	9792387	9794891	50	63	120	62	94	148	93	56	102	46	127	127	65	87	96	83	65	100	267	153	101	48	25	106	6	11	28	15	13	16	12	9	10	13	10	5	7	8	10	10	74	38	61	39	31	113
chr1_9824362_hg38	chr1	9821783	9826940	248	282	1041	365	122	606	498	161	544	459	589	515	489	235	575	457	151	590	1186	701	209	390	77	598	111	196	318	196	260	352	199	221	243	147	200	135	221	142	151	166	303	182	250	272	162	424
chr1_9835940_hg38	chr1	9834717	9837164	137	99	238	206	66	246	143	68	249	270	186	202	194	97	191	214	74	240	931	494	160	148	33	275	35	57	254	213	85	85	70	59	56	83	54	30	79	56	55	75	53	47	95	66	58	117
chr1_9859355_hg38	chr1	9858306	9860404	74	74	163	47	22	73	72	56	69	86	112	112	58	50	83	109	70	116	398	254	155	84	31	144	34	67	153	125	111	116	87	78	75	79	28	33	64	41	44	46	110	64	118	83	42	150
chr1_9862504_hg38	chr1	9860669	9864339	133	141	291	92	43	155	82	68	104	109	116	160	90	97	103	166	91	204	843	1077	252	169	45	253	63	83	207	169	150	145	120	103	109	105	64	47	113	76	89	113	184	154	216	278	137	413
chr1_9872726_hg38	chr1	9871226	9874225	78	80	165	67	38	111	42	38	93	72	99	104	57	72	107	95	69	161	823	631	127	72	19	133	53	61	200	160	87	87	82	61	97	71	49	51	76	58	64	88	71	46	93	83	44	133
chr1_9876196_hg38	chr1	9874326	9878066	114	162	263	140	123	260	196	135	231	158	232	265	184	188	230	201	110	268	473	471	189	144	62	258	96	110	170	123	162	156	191	93	172	108	113	97	197	126	118	186	108	61	95	122	64	170
chr1_9910200_hg38	chr1	9908161	9912239	198	203	466	244	101	313	385	114	397	361	450	371	333	228	394	329	150	371	793	419	167	236	77	353	89	98	105	104	99	156	158	109	165	93	124	77	145	104	135	122	169	125	179	218	107	346
chr1_9929377_hg38	chr1	9928063	9930691	34	110	49	58	137	149	189	77	133	42	147	102	96	163	124	74	76	89	22	22	21	72	38	92	56	52	22	22	51	57	95	47	111	21	51	46	85	51	83	81	93	74	92	254	138	273
chr1_9943272_hg38	chr1	9941793	9944750	96	117	304	146	60	286	261	90	228	181	266	205	213	145	234	183	79	229	346	167	65	176	49	217	73	83	69	33	101	134	90	96	100	74	110	67	107	84	93	129	108	78	132	183	78	292
chr1_9984810_hg38	chr1	9982884	9986736	58	142	131	131	210	229	305	145	246	117	263	183	205	225	267	185	108	181	31	15	19	87	35	143	75	81	49	29	63	82	129	49	106	55	77	63	157	77	93	121	15	11	34	35	12	58
chr1_10001156_hg38	chr1	9999867	10002444	35	59	46	118	96	112	145	90	109	112	138	108	123	185	95	90	33	79	12	12	44	47	35	75	13	24	12	13	12	14	17	12	16	12	10	13	41	15	13	24	6	8	15	16	11	21
chr1_10046790_hg38	chr1	10043109	10050471	140	192	195	181	230	404	416	183	391	165	304	430	254	312	348	165	109	274	1614	718	395	167	70	188	68	97	330	205	99	74	117	74	95	61	50	73	172	103	118	141	137	151	237	375	182	628
chr1_10057778_hg38	chr1	10054741	10060814	161	276	398	190	275	732	416	216	601	208	352	528	331	438	592	261	157	383	210	175	123	173	113	323	120	136	140	48	162	112	210	96	175	69	101	81	227	124	150	178	95	90	197	240	136	432
chr1_10067158_hg38	chr1	10064403	10069914	128	214	241	262	256	458	569	244	469	239	374	390	393	392	397	268	217	321	107	97	101	161	98	264	80	100	57	33	110	92	139	68	114	61	102	58	195	83	137	173	93	83	136	236	137	372
chr1_10074565_hg38	chr1	10072601	10076529	100	276	327	129	268	405	371	155	408	127	357	372	208	258	363	205	242	332	125	48	126	152	114	270	118	126	110	65	140	102	188	86	146	68	112	79	193	99	141	195	84	51	92	228	90	311
chr1_10083986_hg38	chr1	10082995	10084978	27	75	54	65	139	126	148	79	113	61	112	84	92	122	98	84	73	74	54	26	26	52	31	68	38	46	37	20	55	59	61	46	70	29	41	41	72	47	47	79	21	26	40	64	23	105
chr1_10107860_hg38	chr1	10105419	10110300	136	378	274	174	298	373	540	222	458	239	391	398	343	499	430	286	224	364	267	312	200	230	94	312	92	81	84	62	158	110	172	81	165	68	102	67	173	106	120	160	109	90	132	241	100	299
chr1_10129828_hg38	chr1	10124944	10134711	185	540	401	328	643	559	939	488	886	386	785	690	648	987	837	461	318	576	423	404	189	305	218	473	222	245	144	120	215	190	316	161	385	110	272	200	409	202	341	306	235	223	339	774	357	1009
chr1_10144048_hg38	chr1	10142814	10145281	46	119	80	63	157	167	251	105	200	65	234	191	109	180	150	107	150	145	283	207	107	77	59	112	77	78	107	105	44	64	102	60	112	29	63	49	87	86	106	88	34	15	48	56	36	124
chr1_10163070_hg38	chr1	10159400	10166739	165	271	205	246	261	364	524	242	401	222	443	332	352	393	394	270	212	275	1814	930	479	214	115	281	111	181	328	432	136	175	192	114	180	92	145	152	260	123	175	230	131	180	233	434	210	659
chr1_10170382_hg38	chr1	10167094	10173671	43	70	89	77	91	135	169	70	109	75	112	111	97	104	111	76	60	84	993	795	448	61	30	74	24	50	226	277	66	59	57	38	61	37	40	37	79	40	51	67	39	40	67	97	53	141
chr1_10179728_hg38	chr1	10178326	10181130	74	130	202	120	130	325	243	143	370	139	290	313	177	258	337	182	161	225	468	764	207	151	68	218	96	124	145	208	98	146	163	99	158	82	126	102	179	125	171	186	99	106	127	242	119	437
chr1_10217416_hg38	chr1	10215494	10219339	47	129	161	92	136	247	261	154	196	78	180	201	127	199	200	117	130	197	123	54	60	117	42	173	50	107	49	40	68	85	82	60	67	58	62	73	137	77	64	120	100	64	96	131	62	232
chr1_10287446_hg38	chr1	10285446	10289445	49	126	139	56	160	155	242	182	210	59	180	168	126	127	210	118	73	149	150	88	77	157	51	158	69	105	54	37	100	76	104	63	89	69	80	64	152	91	89	131	105	90	133	177	91	203
chr1_10296018_hg38	chr1	10293877	10298160	34	193	138	70	194	205	370	235	252	98	240	301	147	276	217	141	106	255	114	86	57	185	71	190	103	108	73	27	114	75	144	66	167	56	119	73	185	122	132	142	180	158	174	300	144	374
chr1_10299467_hg38	chr1	10298626	10300308	14	62	26	39	41	47	81	78	68	37	75	84	47	83	70	32	44	63	28	49	23	53	23	54	23	42	17	17	23	30	46	22	40	23	24	27	103	49	38	60	46	48	63	99	48	153
chr1_10326210_hg38	chr1	10325093	10327326	28	47	45	42	55	80	116	38	63	41	86	65	65	76	89	51	44	53	101	102	59	42	24	65	61	65	71	47	58	47	85	44	72	39	44	52	135	45	78	109	66	75	115	193	91	322
chr1_10339578_hg38	chr1	10336453	10342704	99	336	283	211	388	439	710	343	458	221	536	433	377	635	440	315	299	406	264	175	109	276	133	382	195	213	113	77	243	188	337	142	418	98	252	166	321	179	310	311	283	265	446	871	439	1194
chr1_10378658_hg38	chr1	10376154	10381163	122	186	313	168	172	310	317	163	235	198	271	259	219	239	256	232	109	256	285	238	106	215	83	264	106	164	125	62	186	185	208	120	192	119	137	123	270	150	147	210	97	60	99	132	42	193
chr1_10430156_hg38	chr1	10428021	10432290	107	119	312	129	47	209	186	76	265	160	210	221	145	128	246	157	44	230	336	181	77	137	34	243	79	99	98	72	152	164	133	107	136	82	112	68	124	74	108	118	133	93	143	137	61	204
chr1_10450367_hg38	chr1	10449350	10451384	29	49	96	27	17	21	57	27	59	14	21	24	26	20	36	38	39	80	26	19	13	50	18	65	4	18	13	13	49	40	29	27	42	22	17	16	27	17	7	15	49	35	55	16	10	27
chr1_10494314_hg38	chr1	10491979	10496648	133	159	283	82	73	189	126	74	154	97	148	174	100	74	147	151	53	191	63	29	31	185	59	233	84	96	57	37	125	131	111	86	95	74	67	50	92	84	97	94	119	98	116	94	60	156
chr1_10510643_hg38	chr1	10509462	10511824	34	91	77	13	37	42	62	36	63	11	31	41	39	57	77	37	42	74	30	11	26	56	37	65	21	41	24	18	41	38	57	40	50	26	27	24	49	37	26	45	25	21	24	28	9	60
chr1_10541294_hg38	chr1	10540179	10542409	14	15	23	25	14	33	38	28	23	23	23	19	19	13	29	18	10	28	55	49	19	20	11	29	11	14	31	27	13	15	22	14	11	13	10	6	17	13	10	14	14	16	29	34	12	50
chr1_10556086_hg38	chr1	10554938	10557233	44	15	47	32	27	47	52	29	53	48	26	29	32	38	46	17	18	46	19	18	11	18	2	36	12	23	14	20	15	20	18	12	18	16	11	13	33	11	10	22	21	28	43	55	35	114
chr1_10614330_hg38	chr1	10611474	10617185	89	90	204	133	86	199	106	92	139	121	99	118	96	128	129	97	106	138	79	61	46	75	46	142	45	67	73	51	105	76	138	71	76	68	59	53	109	59	73	105	27	34	59	63	31	104
chr1_10629415_hg38	chr1	10628418	10630412	19	11	49	35	4	41	26	12	28	29	50	37	25	16	21	11	5	28	56	24	6	25	5	39	13	31	39	53	25	26	23	24	22	36	10	16	29	18	16	18	9	12	15	17	13	26
chr1_10638761_hg38	chr1	10637618	10639904	47	9	92	35	10	51	47	1	36	66	37	41	64	11	49	79	2	72	37	7	7	51	2	55	8	20	30	14	39	17	32	31	30	30	33	13	30	22	18	24	4	9	4	6	1	21
chr1_10644452_hg38	chr1	10643141	10645764	71	54	137	21	2	30	31	13	38	35	23	19	28	18	31	70	48	96	36	27	8	58	13	110	4	32	33	29	60	61	36	37	46	52	21	15	22	23	19	7	18	14	31	11	11	41
chr1_10659276_hg38	chr1	10657911	10660640	24	6	37	31	8	35	23	6	26	32	31	28	23	16	27	29	19	31	124	77	26	26	6	21	6	18	67	35	22	10	13	14	9	24	10	12	11	18	4	10	16	9	14	11	9	25
chr1_10665067_hg38	chr1	10661004	10669130	207	101	300	347	86	369	257	74	374	491	329	299	314	129	379	305	62	303	137	104	75	190	66	361	44	85	87	78	91	86	72	71	88	83	50	48	90	77	70	67	56	59	85	65	30	104
chr1_10683628_hg38	chr1	10681225	10686030	41	25	55	71	36	71	68	34	69	86	56	61	54	37	68	40	37	47	342	346	106	35	22	53	15	42	108	124	40	29	53	34	34	44	26	30	40	40	33	25	27	21	36	47	28	71
chr1_10694727_hg38	chr1	10692926	10696528	97	27	170	145	24	258	185	37	125	225	122	114	188	57	154	131	12	123	246	52	16	134	22	116	19	24	16	10	20	45	29	29	20	32	24	20	31	23	23	27	16	10	17	23	8	34
chr1_10735274_hg38	chr1	10734016	10736531	20	17	38	52	20	70	66	28	96	52	38	69	74	46	97	48	14	43	28	16	9	47	13	67	18	53	20	20	28	37	26	19	21	27	24	20	54	29	20	29	8	17	28	16	9	40
chr1_10865205_hg38	chr1	10861510	10868900	115	90	219	149	46	155	159	64	120	166	91	126	128	62	142	141	59	134	177	180	130	135	43	153	42	75	45	51	107	69	64	50	67	62	40	38	79	56	61	84	41	59	63	85	54	133
chr1_10902060_hg38	chr1	10900660	10903461	59	42	121	31	12	40	36	11	23	21	22	31	30	16	27	65	3	60	23	8	3	58	12	60	13	35	24	30	61	66	38	41	36	40	21	21	37	28	12	42	27	23	18	19	11	43
chr1_10942052_hg38	chr1	10941005	10943099	29	22	38	45	33	80	58	28	46	69	39	45	41	32	54	33	22	46	17	6	5	21	20	59	16	23	20	8	25	9	33	19	16	28	20	15	24	14	20	33	19	22	25	32	15	35
chr1_10945294_hg38	chr1	10943369	10947219	93	58	120	113	46	175	106	62	136	130	119	146	109	83	129	88	58	104	43	26	11	58	21	112	30	56	31	19	72	60	58	48	48	59	36	32	57	59	42	68	33	49	57	33	23	89
chr1_10951822_hg38	chr1	10949584	10954061	86	152	162	26	33	29	71	60	64	37	25	41	74	61	69	51	50	65	34	30	15	72	20	92	11	19	24	20	85	53	29	16	31	30	17	17	23	10	13	26	50	34	24	21	10	18
chr1_10961137_hg38	chr1	10960032	10962242	45	39	61	69	23	102	72	27	94	80	63	80	72	39	77	56	29	67	18	10	9	51	14	56	13	26	15	10	40	16	27	19	16	13	16	9	28	20	10	22	15	21	26	39	27	63
chr1_10969273_hg38	chr1	10967718	10970828	57	67	94	49	57	130	121	68	134	68	107	114	81	156	125	58	22	76	16	8	9	64	16	76	20	35	27	26	31	23	26	14	25	34	25	8	43	29	24	20	21	26	28	64	27	52
chr1_11038818_hg38	chr1	11037071	11040566	44	79	78	47	33	64	65	46	60	36	57	56	47	30	45	63	36	63	42	41	63	56	35	91	19	26	45	34	60	60	51	42	33	56	26	22	48	29	26	34	33	25	31	23	16	50
chr1_11108738_hg38	chr1	11106990	11110487	36	81	59	64	79	93	250	115	96	43	154	83	113	117	105	85	91	82	32	26	10	84	42	87	15	66	23	17	40	40	38	29	29	52	31	33	70	43	39	69	42	45	63	70	48	136
chr1_11133954_hg38	chr1	11132459	11135448	30	73	78	42	52	67	148	89	81	29	111	77	58	89	72	74	32	84	167	168	94	84	37	93	28	53	87	40	61	60	46	35	43	42	23	22	51	40	21	55	31	48	66	28	21	54
chr1_11145491_hg38	chr1	11142526	11148456	56	122	136	30	43	78	211	102	93	47	126	125	87	90	109	82	77	107	1139	501	320	99	60	117	25	62	239	253	76	78	61	48	56	69	34	34	51	45	32	51	111	82	113	57	45	104
chr1_11152160_hg38	chr1	11150330	11153990	93	137	118	30	42	51	190	108	57	39	90	77	67	79	104	103	87	121	193	175	144	122	52	139	24	55	91	73	83	95	48	38	57	65	36	26	51	24	22	26	100	72	91	50	39	67
chr1_11157427_hg38	chr1	11154569	11160285	113	300	370	32	66	112	284	180	159	75	159	119	126	144	220	144	127	236	1053	450	268	186	98	266	28	73	245	310	152	190	95	93	100	96	73	43	88	52	29	32	202	150	134	70	49	109
chr1_11178014_hg38	chr1	11174994	11181034	197	288	402	73	77	183	270	238	312	98	190	174	181	225	307	149	121	231	189	228	204	199	86	316	38	84	101	72	202	159	93	77	96	107	56	52	85	74	47	54	98	130	151	85	109	225
chr1_11188035_hg38	chr1	11185374	11190696	114	212	199	74	150	180	317	176	215	104	169	196	154	186	269	147	115	228	567	297	287	172	88	249	47	67	168	149	127	134	103	69	81	110	69	54	114	60	51	73	130	109	146	62	36	90
chr1_11197250_hg38	chr1	11192177	11202324	138	256	245	104	187	266	343	160	229	151	224	218	161	198	201	175	160	189	1942	998	693	184	101	216	48	101	554	435	161	117	121	78	104	123	66	51	167	74	82	73	100	85	133	119	59	195
chr1_11204404_hg38	chr1	11202869	11205938	35	30	41	22	19	39	54	22	28	18	35	30	57	44	33	33	14	28	405	279	160	29	18	59	12	16	108	88	39	19	22	26	19	16	18	10	24	17	13	21	16	31	36	30	12	44
chr1_11214050_hg38	chr1	11210825	11217276	123	264	204	118	232	310	435	225	346	152	303	356	194	191	283	173	125	236	107	72	66	199	75	231	55	96	96	46	121	81	122	53	109	67	67	61	111	82	75	105	87	97	130	167	110	298
chr1_11267894_hg38	chr1	11266564	11269225	39	57	54	68	73	110	107	42	100	41	48	73	105	86	103	63	29	80	9	5	16	39	9	73	10	22	9	8	23	24	19	12	14	11	19	15	20	7	9	15	6	8	15	12	24	45
chr1_11280928_hg38	chr1	11279557	11282300	46	50	72	22	51	113	131	94	136	37	93	91	78	52	153	68	32	94	32	10	10	54	31	96	36	82	23	22	53	51	67	51	75	44	43	29	85	57	39	58	20	17	30	53	37	66
chr1_11286886_hg38	chr1	11285738	11288034	29	21	69	43	49	121	75	28	47	64	79	75	38	30	57	36	26	64	27	14	13	49	16	51	47	53	38	19	54	60	75	31	39	36	43	20	74	52	44	65	27	43	48	66	60	123
chr1_11293130_hg38	chr1	11292074	11294187	15	10	28	29	20	66	25	33	16	20	31	33	24	15	32	18	3	35	11	8	12	12	17	24	13	21	46	51	18	20	31	19	21	24	12	11	26	21	18	30	10	13	22	21	12	34
chr1_11302054_hg38	chr1	11300911	11303197	27	34	49	103	41	164	79	40	76	66	97	97	70	72	67	69	4	72	14	7	3	36	20	65	28	48	8	12	57	36	64	29	39	23	42	26	63	25	53	63	14	11	35	45	26	88
chr1_11312126_hg38	chr1	11311131	11313122	30	18	24	35	43	102	55	34	33	57	69	36	54	37	38	27	36	30	16	8	5	20	18	31	28	28	21	18	41	42	47	33	38	36	35	23	56	28	34	50	7	12	16	18	9	38
chr1_11350260_hg38	chr1	11349171	11351349	22	43	65	6	7	12	35	29	43	18	17	16	39	32	76	24	7	20	4	5	3	23	10	20	7	22	11	7	26	26	13	14	12	15	19	7	13	11	9	6	14	17	18	17	6	30
chr1_11356504_hg38	chr1	11354033	11358975	118	118	289	50	22	54	175	117	162	101	69	114	113	88	254	115	56	179	57	22	23	155	43	244	25	63	27	34	78	49	24	44	46	63	36	31	40	16	19	27	37	42	69	27	22	72
chr1_11384486_hg38	chr1	11383485	11385486	23	27	74	40	33	50	49	35	37	22	28	38	27	22	34	32	28	48	12	11	15	20	14	32	22	28	15	18	44	30	40	29	34	31	23	23	50	26	31	47	13	8	22	18	10	20
chr1_11387988_hg38	chr1	11386990	11388985	5	13	18	18	13	21	15	14	11	26	25	15	20	28	15	25	1	25	13	12	12	5	5	19	7	27	13	10	20	11	17	11	18	18	12	24	24	10	11	19	4	6	14	13	10	21
chr1_11448967_hg38	chr1	11447513	11450421	43	50	83	69	46	170	52	23	108	60	60	44	67	53	86	45	40	45	33	25	22	30	12	69	11	12	16	18	41	29	24	24	24	21	26	15	27	22	23	17	18	20	51	33	23	104
chr1_11459704_hg38	chr1	11455032	11464376	152	243	510	340	265	639	287	182	644	382	447	594	337	356	654	311	184	451	77	43	34	160	105	349	131	114	62	51	135	140	236	100	195	117	133	101	189	111	176	163	218	303	541	848	500	1601
chr1_11481612_hg38	chr1	11477963	11485260	202	194	841	75	34	170	171	76	204	151	183	216	148	87	248	199	46	283	245	91	67	229	51	295	14	34	55	33	148	147	48	61	63	59	41	25	42	32	21	29	200	93	167	110	56	214
chr1_11499782_hg38	chr1	11498643	11500921	45	40	84	49	40	54	112	79	100	54	87	69	71	71	111	72	42	67	21	14	7	84	32	85	15	30	17	22	71	71	43	45	37	30	28	16	34	34	26	24	60	47	85	47	50	122
chr1_11650911_hg38	chr1	11644960	11656862	596	448	1325	1014	327	1472	879	332	1420	1257	1205	1409	971	780	1337	872	279	1068	2469	1100	295	622	158	1026	305	320	337	286	557	451	546	287	555	285	392	252	591	316	471	418	509	325	704	914	528	1806
chr1_11664650_hg38	chr1	11663398	11665902	107	40	265	163	31	198	202	28	184	253	196	146	254	76	180	213	29	190	461	157	24	151	17	175	45	72	74	47	86	109	84	73	82	93	94	68	91	58	63	59	68	55	82	69	58	159
chr1_11705006_hg38	chr1	11700063	11709948	208	186	414	268	114	391	284	150	471	331	236	348	309	230	515	263	103	352	1096	1363	480	202	90	342	109	159	145	210	249	234	241	163	175	174	169	130	253	172	163	190	92	137	161	153	84	317
chr1_11715513_hg38	chr1	11714059	11716967	36	51	99	30	20	47	44	29	63	24	27	32	45	58	63	50	17	51	485	509	183	45	18	56	24	39	37	29	38	60	41	29	30	29	23	20	33	32	25	26	60	34	32	45	22	73
chr1_11720416_hg38	chr1	11718511	11722321	83	130	233	116	54	164	154	43	151	131	142	136	137	85	120	84	30	143	378	240	101	83	27	126	55	53	54	65	65	70	86	41	54	38	58	36	74	34	67	85	33	30	48	59	30	105
chr1_11748356_hg38	chr1	11746676	11750036	51	27	72	113	23	149	56	31	101	145	64	116	66	29	73	62	28	71	28	40	15	50	7	90	134	84	43	18	126	103	169	82	222	49	134	84	195	105	169	173	33	38	57	41	16	64
chr1_11788104_hg38	chr1	11783013	11793194	598	407	1376	536	174	739	717	310	795	934	1154	795	808	462	868	775	337	886	1137	692	314	676	212	924	312	467	420	230	589	618	609	490	638	463	410	321	652	429	419	523	185	245	306	252	133	398
chr1_11804480_hg38	chr1	11800888	11808072	327	334	1097	368	189	1027	678	293	839	567	959	782	489	311	921	581	285	760	1178	374	188	524	134	844	214	336	256	162	369	442	368	306	436	240	297	227	319	260	259	265	323	243	359	343	192	640
chr1_11842002_hg38	chr1	11840504	11843501	78	95	150	43	29	50	68	41	44	79	128	50	78	53	76	67	35	84	81	103	41	80	30	102	29	30	38	35	77	72	69	50	30	35	32	20	48	43	36	43	68	31	57	35	19	44
chr1_11880417_hg38	chr1	11879346	11881488	41	28	64	107	25	95	90	39	94	103	81	61	102	45	97	92	41	52	32	14	5	48	18	61	17	36	21	20	39	23	37	26	34	28	27	28	42	23	37	35	16	14	23	33	17	46
chr1_11909222_hg38	chr1	11907570	11910873	153	324	631	227	176	504	408	170	571	278	648	455	300	291	592	288	142	468	679	399	81	313	77	479	114	204	190	152	200	287	217	192	320	151	196	169	206	140	218	178	219	142	184	228	128	352
chr1_11920200_hg38	chr1	11918106	11922293	193	219	458	237	120	376	295	123	305	327	345	331	285	237	264	261	89	312	363	249	104	226	63	342	99	142	97	109	153	179	160	117	161	92	85	105	217	110	135	211	246	169	332	451	258	850
chr1_11927204_hg38	chr1	11922302	11932106	216	279	495	378	261	635	498	240	526	444	523	440	538	489	538	420	147	465	369	188	106	329	90	402	157	198	112	86	218	258	295	183	288	162	215	177	342	202	211	336	175	135	199	266	144	452
chr1_11934704_hg38	chr1	11933188	11936220	204	129	430	287	105	489	340	113	462	390	341	394	407	237	456	361	150	346	386	171	48	251	47	321	93	147	91	61	122	155	163	105	193	83	132	98	134	85	147	149	121	68	128	121	67	247
chr1_11980310_hg38	chr1	11978640	11981979	226	117	463	287	65	351	348	79	370	412	394	354	356	185	380	353	87	343	667	178	80	235	38	333	77	100	129	95	137	183	162	104	166	109	136	74	153	101	102	123	147	92	173	157	101	332
chr1_12031754_hg38	chr1	12030273	12033234	58	19	87	62	21	89	58	39	65	87	88	69	88	46	81	66	19	64	47	50	20	56	15	72	24	37	38	24	43	59	34	29	38	39	32	27	45	39	29	31	19	15	44	41	21	50
chr1_12034588_hg38	chr1	12033337	12035838	43	43	72	78	59	112	141	42	86	75	76	77	78	97	99	76	25	61	104	42	34	41	29	69	14	28	17	17	39	31	31	27	30	26	37	22	36	38	25	27	39	45	56	83	40	122
chr1_12053105_hg38	chr1	12051364	12054846	83	56	118	46	21	75	38	55	43	90	58	68	57	25	43	63	52	68	224	115	86	57	30	90	13	29	35	25	57	49	32	17	34	40	18	8	38	31	27	35	37	48	67	65	35	109
chr1_12125860_hg38	chr1	12124604	12127115	34	48	82	62	35	84	90	68	71	94	142	79	84	73	77	61	85	89	30	26	11	57	28	77	29	45	22	18	45	66	50	33	31	47	27	32	44	33	33	32	21	15	48	29	19	50
chr1_12142116_hg38	chr1	12139866	12144365	72	123	193	101	71	174	150	108	154	198	405	175	167	134	188	138	127	173	41	32	12	90	51	211	44	101	57	41	77	138	85	91	96	121	83	65	98	72	59	59	60	83	108	78	43	182
chr1_12168024_hg38	chr1	12166379	12169669	79	67	246	90	42	176	169	107	216	226	327	246	203	100	296	191	100	233	39	16	8	142	58	258	47	93	31	11	74	122	71	97	76	93	55	46	97	81	41	46	64	92	77	68	40	105
chr1_12174031_hg38	chr1	12171557	12176505	81	133	308	71	77	222	194	154	233	218	430	226	149	158	326	183	219	297	44	32	15	149	87	272	40	114	65	31	92	165	108	101	111	150	79	62	110	123	62	48	87	107	141	78	67	162
chr1_12182376_hg38	chr1	12177734	12187017	236	294	647	264	151	522	409	364	564	542	1109	633	504	395	720	523	364	647	118	72	31	357	145	667	77	236	100	61	179	242	174	226	227	224	174	130	268	209	126	117	161	256	239	192	168	368
chr1_12215714_hg38	chr1	12214649	12216778	13	34	34	9	5	19	15	13	14	25	16	8	7	18	11	15	23	30	26	11	13	8	8	29	6	15	29	118	17	14	10	8	21	12	10	10	22	17	16	10	7	10	18	7	6	20
chr1_12230066_hg38	chr1	12227691	12232442	184	100	384	252	69	315	308	111	311	424	373	317	398	117	311	314	66	305	516	169	62	232	41	308	87	149	130	89	175	166	156	162	149	154	142	102	176	131	131	143	133	101	145	150	86	286
chr1_12316736_hg38	chr1	12315655	12317818	31	83	71	8	33	44	69	87	51	19	35	26	40	44	83	35	44	51	13	14	3	40	14	39	14	17	12	10	63	27	40	19	28	35	34	13	29	22	21	26	39	25	51	34	19	83
chr1_12341292_hg38	chr1	12335527	12347056	155	953	921	68	194	219	508	490	346	157	366	304	199	351	461	240	315	577	146	141	87	385	205	608	83	130	148	112	287	182	172	110	219	161	127	82	169	113	79	83	452	313	375	200	97	314
chr1_12376200_hg38	chr1	12374798	12377602	60	138	75	17	45	63	102	99	71	35	76	44	51	92	101	81	75	89	20	19	11	87	56	93	15	22	17	15	30	45	32	23	29	26	32	14	32	21	17	18	48	33	27	26	10	39
chr1_12381065_hg38	chr1	12379610	12382520	27	74	75	22	53	66	136	82	55	30	111	80	66	56	79	52	75	72	23	21	7	64	28	79	36	30	11	10	39	31	51	18	29	30	28	23	69	32	22	36	19	27	30	25	26	33
chr1_12407296_hg38	chr1	12405229	12409363	62	159	171	46	124	217	242	194	149	61	209	234	102	114	135	95	122	120	29	27	13	128	72	163	39	82	33	21	63	58	87	41	62	73	55	27	79	60	50	40	118	99	117	106	77	234
chr1_12434766_hg38	chr1	12432095	12437436	216	428	499	93	134	223	224	188	203	129	184	188	152	199	237	185	182	279	38	32	35	205	100	283	44	88	45	34	157	125	101	83	88	91	66	56	107	73	80	77	104	99	124	135	81	196
chr1_12449786_hg38	chr1	12447422	12452151	81	223	191	58	165	233	363	252	272	92	254	296	146	235	262	135	118	193	52	59	19	221	105	231	53	84	52	38	88	68	99	71	98	75	60	54	128	85	67	69	126	95	163	203	150	404
chr1_12479751_hg38	chr1	12477206	12482296	164	252	445	93	99	201	202	146	200	129	174	197	143	141	248	182	80	255	95	100	61	203	69	212	41	95	65	56	110	89	89	55	79	91	58	49	80	77	51	57	139	99	163	80	38	136
chr1_12505768_hg38	chr1	12503707	12507828	119	78	161	176	113	286	177	118	209	193	238	247	176	193	178	139	53	162	44	47	27	100	58	150	61	78	66	36	90	61	111	49	77	69	61	46	156	67	75	90	97	111	148	117	51	231
chr1_12510968_hg38	chr1	12508324	12513612	115	122	208	78	96	247	227	196	186	165	243	200	141	184	202	157	65	190	46	60	41	162	70	160	43	78	52	38	102	68	77	53	82	70	50	43	105	60	54	56	70	55	100	74	38	116
chr1_12553691_hg38	chr1	12552584	12554798	48	21	72	42	13	55	72	37	55	77	77	69	53	28	64	43	3	47	26	1	5	46	16	64	13	66	31	20	46	31	34	33	26	43	23	18	61	20	20	24	16	22	30	25	15	53
chr1_12594372_hg38	chr1	12590457	12598287	263	151	490	211	93	349	293	181	230	354	503	413	282	146	292	320	118	291	68	34	30	288	99	287	36	121	58	40	120	78	87	89	79	110	63	60	118	87	55	88	119	88	157	91	62	176
chr1_12617544_hg38	chr1	12614131	12620957	264	320	1071	170	116	495	364	253	576	312	789	654	281	230	722	364	300	703	56	42	18	433	123	664	126	266	102	46	335	259	224	194	266	241	242	122	274	175	132	177	350	196	265	134	88	254
chr1_12717730_hg38	chr1	12716661	12718800	7	6	5	8	16	12	17	17	20	17	13	14	14	14	31	10	17	10	10	4	1	9	7	10	32	24	13	11	28	19	51	11	28	18	24	23	45	22	45	31	7	18	21	17	17	60
chr1_13542412_hg38	chr1	13539583	13545240	79	93	113	117	66	184	135	110	136	134	138	178	127	172	123	111	74	121	186	149	101	87	51	114	35	66	45	50	68	56	77	58	68	78	37	42	126	51	55	69	46	32	63	78	33	137
chr1_13585155_hg38	chr1	13582910	13587400	131	208	395	147	92	227	213	131	190	279	341	279	182	184	205	185	136	217	52	41	8	214	58	254	42	175	44	27	151	133	102	112	123	109	69	87	175	109	71	124	71	38	92	110	60	247
chr1_13620040_hg38	chr1	13615700	13624379	185	309	340	47	65	90	121	87	47	90	132	99	48	85	73	187	183	196	84	45	22	250	84	317	24	41	48	52	177	157	93	102	155	117	36	26	70	37	32	41	59	43	67	31	31	56
chr1_13700326_hg38	chr1	13698539	13702113	154	160	325	237	73	272	328	103	261	409	290	212	369	177	262	290	136	230	447	218	90	224	38	237	64	106	89	89	114	148	129	75	98	77	102	64	106	111	89	104	121	109	131	114	61	173
chr1_13731286_hg38	chr1	13730293	13732280	16	58	60	14	26	39	55	52	33	23	53	33	30	33	29	34	21	49	133	44	33	52	15	66	12	19	44	49	27	43	26	21	22	26	13	19	30	16	22	20	22	33	33	28	12	46
chr1_13751884_hg38	chr1	13747825	13755942	155	286	567	244	196	553	534	257	478	353	440	346	394	218	490	381	176	463	479	125	74	352	93	481	125	155	83	60	202	194	246	127	225	116	157	135	229	145	154	226	155	139	148	223	93	311
chr1_13757050_hg38	chr1	13756046	13758055	10	68	48	15	65	42	77	48	41	11	36	50	16	40	50	22	15	56	9	25	14	52	25	39	29	27	14	14	30	43	47	15	39	22	20	28	42	30	34	50	20	28	30	37	12	55
chr1_13763080_hg38	chr1	13760589	13765571	54	271	205	103	220	240	285	172	218	71	170	193	138	188	173	124	159	227	60	58	37	169	90	269	95	112	44	38	142	147	177	107	151	78	111	84	155	126	130	162	104	104	121	117	85	169
chr1_13786714_hg38	chr1	13785678	13787751	16	63	77	31	40	37	57	25	39	36	22	26	30	41	43	33	30	49	52	47	37	53	28	54	13	24	19	15	50	56	41	30	36	32	17	20	31	28	32	29	23	21	24	8	10	20
chr1_13793629_hg38	chr1	13792057	13795201	56	185	277	34	49	75	115	94	130	35	41	49	60	98	197	64	97	123	32	27	25	83	69	154	29	43	23	18	100	71	41	38	70	46	43	32	26	27	13	41	192	117	110	78	38	89
chr1_13802233_hg38	chr1	13800139	13804327	135	166	283	51	42	85	112	63	84	77	81	58	93	68	93	113	80	149	59	60	33	143	58	198	30	61	59	32	191	171	86	76	92	102	46	46	49	53	32	76	236	168	214	106	76	179
chr1_13806269_hg38	chr1	13804846	13807692	66	126	184	34	35	92	48	47	57	45	46	50	56	44	55	61	51	87	26	45	33	74	27	135	23	31	28	18	115	92	49	42	58	63	21	26	32	50	28	33	199	115	152	120	85	158
chr1_13808986_hg38	chr1	13807772	13810201	37	52	97	23	33	47	44	35	38	58	39	39	37	37	27	52	32	54	64	70	35	42	24	72	15	24	15	25	44	36	31	28	23	34	15	18	21	21	17	28	50	60	64	77	49	156
chr1_13893718_hg38	chr1	13891237	13896200	90	158	430	52	20	55	114	52	85	82	122	112	74	39	117	115	119	257	58	51	40	158	54	256	30	64	44	26	162	162	105	91	114	81	59	48	55	79	30	59	99	56	74	48	17	37
chr1_13926683_hg38	chr1	13924955	13928411	39	76	144	6	8	24	75	110	91	19	26	29	36	40	102	41	29	77	24	4	13	77	37	66	9	21	20	27	42	43	29	31	28	27	21	11	15	15	8	13	20	22	24	14	10	25
chr1_13966202_hg38	chr1	13965024	13967380	31	55	78	15	31	64	38	29	53	9	35	59	29	26	53	36	31	69	29	33	48	37	16	64	28	14	43	25	76	46	48	35	32	43	18	16	33	23	27	35	25	25	32	30	16	26
chr1_14017718_hg38	chr1	14016182	14019254	32	72	108	25	71	80	95	72	100	32	73	115	36	42	87	36	57	117	15	6	10	74	40	98	20	36	21	18	53	54	59	26	44	30	29	35	47	41	36	50	61	57	73	45	32	80
chr1_14082812_hg38	chr1	14080954	14084671	17	37	59	10	14	24	38	14	21	2	19	16	14	8	23	35	62	38	385	222	128	32	16	42	18	20	151	244	64	43	28	24	28	18	12	17	29	17	16	20	14	16	26	13	8	31
chr1_14111950_hg38	chr1	14106472	14117428	174	385	523	134	207	207	386	269	467	163	260	319	238	353	475	245	265	357	1082	686	601	258	143	347	111	121	392	386	281	222	240	132	200	131	136	78	190	113	136	169	174	183	242	235	110	443
chr1_14136782_hg38	chr1	14135781	14137782	16	39	25	33	21	28	67	38	55	30	31	36	55	48	57	27	40	38	14	23	33	28	13	28	17	30	32	17	30	44	33	32	18	28	26	15	29	20	22	28	34	41	45	32	25	57
chr1_14140977_hg38	chr1	14138028	14143926	82	116	161	85	100	121	289	151	259	103	102	121	148	183	244	110	80	120	199	116	163	102	45	122	49	68	123	107	95	89	110	73	77	89	60	54	109	71	75	94	76	77	132	99	50	185
chr1_14165655_hg38	chr1	14164491	14166819	22	38	43	33	53	56	71	65	86	35	62	56	50	72	83	42	68	40	23	10	5	33	20	47	17	28	11	13	29	26	42	19	26	16	13	22	33	21	30	37	26	43	43	45	37	87
chr1_14181578_hg38	chr1	14180513	14182642	9	50	37	19	54	43	117	59	58	25	45	44	54	42	52	31	68	41	14	5	12	34	20	42	19	35	13	9	31	23	43	18	32	14	34	30	39	17	27	41	29	36	44	48	26	85
chr1_14184568_hg38	chr1	14183095	14186040	32	50	80	23	42	41	83	64	63	38	38	32	36	69	56	38	33	68	90	31	45	57	36	69	21	34	41	55	41	40	43	17	36	45	20	21	30	20	19	32	47	46	74	61	39	138
chr1_14258504_hg38	chr1	14251637	14265370	212	664	544	386	526	561	1663	674	1344	439	836	856	802	838	1320	559	562	643	172	113	111	472	266	681	301	279	109	92	283	257	516	205	594	176	390	225	488	198	493	480	425	391	704	1275	634	2136
chr1_14282820_hg38	chr1	14281617	14284022	13	44	68	27	55	41	77	54	65	35	44	60	51	91	71	38	40	49	60	26	29	36	17	37	25	36	51	54	31	28	48	27	30	20	38	23	46	22	31	42	20	20	35	61	24	86
chr1_14292556_hg38	chr1	14291465	14293648	24	39	54	29	36	42	57	38	53	43	45	38	47	68	57	52	28	75	14	9	6	50	33	79	19	20	15	11	34	38	55	29	48	21	18	23	38	22	31	49	9	14	34	27	14	56
chr1_14310686_hg38	chr1	14309498	14311873	27	78	62	56	69	78	155	78	92	35	64	81	54	56	73	49	29	59	8	4	10	52	29	66	26	33	5	10	45	43	49	22	39	34	25	22	34	19	37	40	20	30	38	44	24	86
chr1_14340755_hg38	chr1	14338938	14342572	28	40	57	27	46	44	126	86	121	29	37	62	62	90	145	38	38	51	12	19	14	47	21	41	12	23	10	11	15	20	42	10	27	16	18	14	22	17	24	29	22	27	43	53	35	80
chr1_14368048_hg38	chr1	14364763	14371332	126	178	193	179	188	165	290	199	386	188	188	255	231	300	424	175	153	255	83	69	63	156	83	220	84	109	51	52	115	76	142	86	117	76	87	63	134	78	112	148	76	79	136	156	78	259
chr1_14425292_hg38	chr1	14423444	14427139	69	137	172	27	44	51	73	51	91	35	55	66	32	75	77	76	40	94	45	29	39	76	52	123	30	22	29	28	32	31	33	21	33	23	32	17	26	22	31	39	45	38	63	63	16	165
chr1_14436990_hg38	chr1	14433850	14440129	127	235	316	111	90	138	249	226	365	150	139	189	218	264	414	149	91	222	37	43	45	129	83	203	47	54	23	30	82	63	75	41	70	59	67	26	61	30	32	59	78	71	101	71	33	198
chr1_14508016_hg38	chr1	14506150	14509882	25	131	73	29	61	48	107	72	64	40	68	70	54	66	60	64	56	82	28	18	26	110	58	127	33	42	18	19	63	51	59	34	53	43	34	30	57	42	46	48	23	24	51	29	23	60
chr1_14512324_hg38	chr1	14511058	14513590	29	56	36	54	74	47	115	61	86	41	53	70	59	108	64	55	33	47	20	21	20	66	36	59	32	35	12	13	21	26	33	16	37	26	11	21	56	24	27	50	21	20	26	13	13	45
chr1_14519244_hg38	chr1	14516735	14521754	49	96	124	47	61	73	152	89	124	34	46	76	86	113	144	77	69	80	134	69	83	95	48	76	22	36	21	38	62	43	53	40	58	44	39	31	62	30	33	51	22	39	46	57	32	97
chr1_14523492_hg38	chr1	14522314	14524669	22	41	49	22	28	31	45	43	84	21	29	31	44	38	80	32	20	54	14	31	45	55	26	50	11	18	11	21	12	17	28	14	14	21	20	10	31	16	15	22	14	11	14	19	15	35
chr1_14552722_hg38	chr1	14551193	14554250	49	38	46	31	33	39	70	57	45	40	33	65	47	61	58	57	17	41	28	30	20	50	10	57	11	44	27	13	45	46	45	25	38	27	43	23	45	26	35	41	18	28	25	32	17	61
chr1_14572316_hg38	chr1	14571084	14573548	21	47	66	39	52	53	102	66	115	40	58	69	65	92	105	47	60	78	16	8	8	42	25	43	32	54	18	21	39	29	45	41	42	25	35	31	56	40	38	53	23	27	31	32	21	88
chr1_14600658_hg38	chr1	14595987	14605329	137	224	574	282	190	443	441	157	581	302	392	508	378	307	549	288	130	406	1427	728	311	271	100	398	149	223	414	324	278	266	267	174	282	171	194	188	400	195	217	267	226	177	243	298	164	478
chr1_14613334_hg38	chr1	14609306	14617363	117	241	293	102	182	235	358	158	440	116	276	329	205	365	359	194	157	278	1322	649	473	146	81	252	55	136	213	306	116	155	142	151	118	83	63	108	260	114	106	140	89	107	185	242	133	424
chr1_14627514_hg38	chr1	14624320	14630709	144	274	320	230	242	341	464	221	600	235	501	505	299	466	524	287	231	408	330	214	172	223	121	365	163	186	104	108	159	219	261	166	254	103	186	185	333	187	218	239	178	149	261	382	184	562
chr1_14655434_hg38	chr1	14653898	14656971	57	63	91	103	40	83	133	78	177	73	92	107	157	132	153	76	40	113	122	82	62	98	31	105	39	74	54	38	78	71	64	53	64	54	52	58	97	49	62	87	68	70	101	146	73	251
chr1_14660934_hg38	chr1	14659927	14661940	23	51	57	17	37	44	59	32	68	31	48	49	51	74	47	39	30	57	75	68	40	33	22	33	36	39	30	21	43	38	65	25	24	25	35	32	60	32	36	44	21	30	36	62	35	60
chr1_14689144_hg38	chr1	14686933	14691355	81	124	167	81	64	110	130	84	176	66	145	154	115	203	145	121	116	176	337	268	198	80	56	171	61	121	87	112	99	113	125	73	119	74	73	119	121	66	81	119	37	35	58	76	33	148
chr1_14712905_hg38	chr1	14710272	14715538	58	67	115	65	45	104	112	67	141	92	106	134	131	118	109	92	68	107	891	350	236	65	39	110	45	87	106	148	65	67	94	66	49	56	53	43	96	61	54	76	40	53	88	105	45	176
chr1_14717778_hg38	chr1	14715574	14719983	38	55	70	44	54	53	63	68	89	46	64	81	47	108	49	53	25	75	375	238	207	45	27	54	24	54	97	127	44	44	41	41	45	37	32	33	49	50	27	48	27	33	57	63	30	84
chr1_14723416_hg38	chr1	14722365	14724468	33	38	36	31	31	45	62	34	83	29	42	53	62	66	49	34	23	32	82	74	55	41	20	35	8	29	17	15	24	20	14	16	20	15	7	19	27	18	12	20	16	18	26	20	10	41
chr1_14732712_hg38	chr1	14730642	14734781	66	81	125	130	76	143	119	76	212	86	119	155	107	165	132	79	41	109	111	103	91	59	33	127	53	81	55	39	70	74	60	43	82	49	53	47	84	65	60	84	51	44	88	91	46	152
chr1_14737384_hg38	chr1	14736352	14738416	22	31	47	40	55	75	39	39	61	33	65	50	42	82	75	30	28	57	33	31	30	27	11	48	20	32	22	20	30	29	46	31	26	23	31	29	56	37	42	60	19	20	39	57	35	115
chr1_14792639_hg38	chr1	14790642	14794636	40	46	82	46	40	77	58	32	87	77	61	78	58	73	82	47	29	64	216	232	187	61	21	83	30	73	65	49	51	63	58	34	49	55	32	47	82	44	41	46	49	43	69	93	38	149
chr1_14804012_hg38	chr1	14803013	14805010	27	17	31	24	10	27	12	23	23	24	23	23	33	27	27	34	27	37	122	113	82	16	8	39	11	34	57	69	27	36	26	24	26	29	9	16	42	17	17	27	22	32	54	58	21	78
chr1_14815512_hg38	chr1	14814446	14816578	31	18	58	13	15	26	16	14	22	17	11	24	16	24	24	31	34	57	352	119	70	32	16	25	19	38	111	114	34	34	36	19	30	27	15	23	42	29	21	21	26	27	35	29	9	77
chr1_14849054_hg38	chr1	14847948	14850161	14	23	36	26	19	28	23	18	23	19	22	21	20	22	26	23	41	28	151	151	96	21	12	26	16	34	36	36	23	37	35	27	22	29	19	24	39	24	17	26	17	22	38	24	25	50
chr1_14853162_hg38	chr1	14850477	14855848	76	97	145	44	37	56	65	70	77	53	58	56	74	67	62	105	48	99	876	556	383	71	40	115	100	111	267	252	145	110	147	89	111	99	86	83	168	82	105	158	56	66	105	119	46	217
chr1_14927790_hg38	chr1	14922378	14933202	337	398	806	556	387	1255	695	345	1042	601	721	764	621	646	909	565	272	739	1670	1346	634	416	151	664	423	304	692	531	464	349	736	264	762	229	391	311	451	289	624	586	174	193	318	389	202	788
chr1_14939896_hg38	chr1	14938896	14940896	66	72	118	117	70	163	101	65	168	131	118	125	139	140	165	116	59	123	97	50	77	66	36	111	77	80	66	44	92	66	141	56	121	41	74	62	102	85	91	122	28	39	59	48	21	99
chr1_14946417_hg38	chr1	14941131	14951703	504	646	1089	792	585	1369	1135	499	1628	1033	1203	1374	1094	1078	1474	983	594	1137	1348	1152	613	578	232	1075	468	448	566	466	554	423	866	330	908	270	551	382	607	352	769	652	281	270	354	294	169	672
chr1_14968956_hg38	chr1	14967770	14970143	92	96	184	123	88	291	195	89	225	137	179	199	177	172	206	163	90	161	115	154	106	100	52	143	75	53	65	65	90	96	136	56	126	51	68	66	134	51	107	91	39	52	113	45	28	102
chr1_14980718_hg38	chr1	14979575	14981860	61	86	118	145	83	212	123	58	164	114	106	145	133	141	126	80	44	98	223	332	189	65	26	91	51	76	55	66	65	47	105	46	91	40	70	59	107	48	69	88	13	25	39	26	25	74
chr1_14988286_hg38	chr1	14987055	14989518	97	71	113	181	80	271	172	60	180	186	162	144	193	131	170	137	64	137	422	383	202	78	38	106	59	98	110	81	81	91	146	67	101	57	87	94	137	103	102	152	38	28	71	73	49	128
chr1_14998314_hg38	chr1	14995428	15001200	150	147	318	194	137	393	184	115	186	198	191	217	209	227	203	165	86	157	1531	1824	556	119	64	179	105	125	424	439	167	125	229	110	177	90	128	113	222	151	142	285	74	90	156	212	92	315
chr1_15007294_hg38	chr1	15002589	15012000	206	196	353	264	218	479	322	203	318	241	254	322	302	332	326	248	144	287	2550	2657	977	165	98	299	190	250	771	759	244	216	362	174	332	183	205	195	338	221	245	396	133	153	245	241	107	399
chr1_15015008_hg38	chr1	15013038	15016977	61	85	141	106	58	159	104	83	119	69	86	88	90	92	108	85	58	116	708	514	267	69	26	121	43	62	315	311	77	56	109	36	79	58	48	45	93	72	75	125	64	78	102	101	56	212
chr1_15029453_hg38	chr1	15026805	15032101	175	235	483	405	222	632	346	176	600	382	435	509	453	455	564	320	133	447	507	566	335	181	89	428	114	166	188	132	153	147	228	125	201	106	148	131	221	121	182	273	169	141	255	413	235	688
chr1_15036905_hg38	chr1	15035482	15038328	74	93	113	170	95	217	136	65	185	192	215	175	144	156	153	111	62	134	217	272	79	80	23	114	74	83	104	55	84	91	155	60	138	45	83	76	130	89	123	155	79	73	165	240	119	410
chr1_15067189_hg38	chr1	15066190	15068188	49	52	85	29	28	54	59	30	43	53	57	52	55	46	49	58	28	66	54	60	28	60	12	73	22	37	45	27	78	61	56	33	41	40	39	20	40	35	31	42	19	30	26	38	15	68
chr1_15089112_hg38	chr1	15086722	15091501	99	85	122	176	107	287	306	98	302	185	163	218	302	236	255	157	62	148	120	216	99	115	42	149	49	89	53	61	68	59	76	44	54	69	45	60	89	68	60	91	24	35	61	63	39	109
chr1_15094908_hg38	chr1	15093848	15095967	21	15	35	25	4	38	84	31	119	44	33	24	105	63	137	23	10	32	22	38	9	35	11	28	14	32	28	15	22	17	19	11	16	29	19	19	24	17	12	22	9	10	17	11	12	50
chr1_15100682_hg38	chr1	15098992	15102372	49	45	93	64	34	165	52	31	135	79	77	133	69	91	108	69	33	79	115	128	116	40	34	78	38	67	78	55	66	64	87	44	60	46	42	54	70	57	73	69	12	25	39	50	36	93
chr1_15140908_hg38	chr1	15139743	15142073	22	12	32	18	12	34	19	7	26	35	40	21	27	21	20	18	15	26	192	162	54	13	7	32	2	22	204	195	14	22	16	17	15	33	10	14	21	10	7	17	13	16	31	24	20	47
chr1_15152896_hg38	chr1	15147177	15158615	164	157	515	205	117	523	315	189	348	310	488	344	254	231	411	301	177	410	1541	768	461	284	117	389	96	193	776	704	243	231	229	201	215	233	147	109	296	160	156	144	227	292	430	415	278	1059
chr1_15179806_hg38	chr1	15177556	15182057	102	122	225	85	122	274	163	123	165	97	170	137	105	127	144	116	113	165	169	131	126	121	57	176	48	54	73	52	73	74	82	62	61	88	46	36	124	52	58	77	47	81	147	101	90	406
chr1_15188573_hg38	chr1	15186356	15190790	91	67	141	87	53	165	113	64	104	124	113	90	119	83	97	92	100	124	337	241	161	60	33	94	23	57	115	85	72	80	68	57	48	78	41	27	149	48	36	53	59	194	290	159	232	876
chr1_15205254_hg38	chr1	15201589	15208919	113	108	177	113	89	203	212	136	154	183	215	185	155	132	185	176	112	180	871	469	319	146	73	196	33	53	64	121	48	49	73	55	48	65	50	34	143	53	42	55	130	230	383	321	279	951
chr1_15214169_hg38	chr1	15212048	15216290	59	66	94	72	46	129	172	81	82	135	170	99	110	77	119	108	80	100	150	103	71	104	32	102	34	61	70	43	55	69	56	48	59	56	43	33	87	43	32	41	70	102	138	112	108	330
chr1_15247404_hg38	chr1	15246328	15248479	38	20	53	50	16	69	53	25	38	70	60	56	57	16	51	46	17	38	36	20	18	35	16	41	10	30	27	20	23	26	20	17	17	21	30	10	35	19	15	17	14	28	28	28	23	95
chr1_15260104_hg38	chr1	15256885	15263323	87	159	246	106	174	258	198	171	209	122	316	233	150	191	235	119	138	189	64	79	43	120	72	203	36	74	50	38	78	73	71	46	60	72	46	38	123	57	48	75	105	156	239	291	175	561
chr1_15280318_hg38	chr1	15279319	15281318	30	26	41	20	10	22	26	16	13	19	24	22	18	19	9	13	2	26	21	36	29	10	11	16	5	24	17	13	28	38	22	13	21	14	17	14	19	12	6	14	11	8	16	17	9	47
chr1_15284310_hg38	chr1	15282757	15285863	29	24	30	24	11	28	32	24	14	18	26	41	19	17	18	18	10	21	238	217	100	12	13	25	5	16	13	22	35	36	14	11	16	24	7	6	21	12	4	14	14	8	12	10	5	28
chr1_15329173_hg38	chr1	15326294	15332052	76	188	232	85	71	123	124	92	105	95	145	101	83	120	126	126	96	214	122	153	78	137	55	236	34	92	77	32	136	78	99	75	92	102	46	41	94	73	50	55	87	113	202	148	71	315
chr1_15337270_hg38	chr1	15336164	15338375	42	40	109	28	10	40	41	17	23	17	48	42	40	24	28	69	47	66	15	12	15	53	25	62	13	44	21	22	47	67	34	38	33	52	17	25	33	29	16	24	73	64	89	28	26	66
chr1_15342090_hg38	chr1	15340788	15343391	38	85	103	9	11	15	29	17	22	13	25	23	21	11	11	50	54	96	10	11	5	80	26	82	15	32	13	9	36	53	27	33	45	41	12	12	35	20	12	12	84	51	97	23	18	31
chr1_15384860_hg38	chr1	15382175	15387544	189	222	343	228	166	343	196	116	242	228	251	288	228	235	243	189	135	285	221	277	131	147	53	254	67	120	44	44	176	131	166	89	111	93	85	70	182	108	95	125	127	128	200	165	83	302
chr1_15402722_hg38	chr1	15400262	15405181	117	212	298	20	25	49	43	45	20	20	42	32	16	37	34	98	31	94	469	241	175	87	46	129	13	34	100	64	128	79	52	32	53	52	19	10	42	14	18	12	115	78	123	35	17	35
chr1_15489232_hg38	chr1	15488031	15490434	28	27	47	62	34	62	87	37	66	64	64	51	85	74	56	49	19	42	89	74	31	30	13	27	17	54	37	12	30	32	47	21	43	37	28	29	29	29	41	36	31	22	44	13	17	53
chr1_15500688_hg38	chr1	15499688	15501688	17	26	35	16	7	33	29	14	17	18	31	18	17	12	19	23	8	21	93	57	26	22	19	21	9	13	39	41	40	55	24	12	25	11	15	20	16	21	19	26	56	50	30	42	9	63
chr1_15513982_hg38	chr1	15512536	15515428	22	57	62	41	65	98	122	50	52	33	71	50	42	37	52	66	17	50	49	26	17	55	17	48	43	55	29	24	52	40	82	30	52	31	41	39	52	43	54	91	41	33	46	121	22	107
chr1_15525402_hg38	chr1	15522208	15528595	241	321	716	295	153	429	541	216	553	379	602	475	384	310	593	397	210	474	1211	387	151	396	125	471	123	169	190	119	191	245	244	167	260	131	182	133	233	167	197	190	154	102	184	202	90	355
chr1_15543312_hg38	chr1	15542215	15544408	55	118	171	15	42	62	71	58	75	13	54	44	44	45	73	66	58	125	14	17	9	75	46	140	25	39	20	26	48	60	60	48	73	30	33	37	49	40	41	49	94	56	77	42	25	45
chr1_15546893_hg38	chr1	15545238	15548548	37	94	80	51	94	129	98	77	121	40	109	92	82	96	124	32	72	107	19	13	10	49	22	89	39	54	22	24	46	62	68	42	71	33	37	39	95	51	63	80	36	24	24	18	22	36
chr1_15567334_hg38	chr1	15566291	15568377	22	47	48	19	36	51	46	44	49	19	52	29	25	42	37	25	8	35	21	15	5	35	28	56	39	42	16	15	35	48	50	27	45	30	32	34	59	32	36	61	11	21	19	25	6	31
chr1_15575174_hg38	chr1	15574021	15576326	37	70	91	32	63	90	80	47	95	51	99	87	72	72	86	68	62	86	42	15	13	63	27	83	37	65	11	25	53	46	85	33	77	35	52	47	55	37	63	76	33	30	53	79	33	107
chr1_15579395_hg38	chr1	15577825	15580965	114	127	198	44	47	65	104	84	78	53	121	69	56	76	68	143	41	157	29	38	19	113	52	153	23	45	24	20	77	58	58	30	50	47	30	28	52	30	30	38	114	97	72	48	21	64
chr1_15627317_hg38	chr1	15625554	15629080	40	108	96	57	157	156	214	122	116	60	150	138	89	84	116	72	117	113	28	28	19	77	49	90	55	45	35	30	55	40	75	45	63	38	33	32	64	39	49	87	46	46	48	108	43	149
chr1_15630430_hg38	chr1	15629210	15631650	38	44	32	68	61	84	87	50	78	34	64	84	65	66	55	63	22	66	25	28	17	33	18	60	27	26	16	8	26	24	46	26	47	23	21	10	28	18	37	46	34	14	47	57	23	98
chr1_15684095_hg38	chr1	15681949	15686241	347	163	584	429	113	578	621	99	355	736	500	429	636	169	425	625	123	406	1179	296	105	400	62	466	115	182	185	146	179	298	193	168	190	184	141	133	183	125	118	170	268	217	282	265	152	564
chr1_15697191_hg38	chr1	15695881	15698501	76	103	152	61	75	158	162	97	115	75	150	137	125	77	138	148	81	133	112	44	39	146	54	157	54	77	74	56	92	97	71	70	87	47	50	40	83	65	57	64	123	109	153	223	94	319
chr1_15714828_hg38	chr1	15713581	15716076	101	144	172	117	113	274	180	96	230	113	209	206	181	166	229	135	82	165	66	39	41	98	41	164	58	76	101	64	90	93	129	49	133	46	73	52	96	46	95	84	198	153	238	446	220	675
chr1_15717978_hg38	chr1	15716978	15718978	59	44	78	36	45	130	33	23	67	45	54	68	37	52	60	42	39	72	54	23	28	26	23	64	32	29	57	44	56	38	66	23	45	32	33	26	52	17	52	36	101	65	140	228	105	381
chr1_15734892_hg38	chr1	15730504	15739281	278	108	381	233	55	287	258	97	245	497	361	297	256	130	232	350	51	316	1708	719	130	308	58	365	100	173	488	505	285	285	183	165	236	190	100	120	227	157	142	153	188	153	255	310	149	589
chr1_15834938_hg38	chr1	15830966	15838909	267	482	1684	420	222	1038	630	320	1500	603	1526	1227	604	582	1584	569	242	1239	1029	750	140	524	134	1148	241	295	551	280	454	556	446	309	733	243	512	270	357	285	443	227	798	554	746	717	426	1315
chr1_15849380_hg38	chr1	15845962	15852799	207	403	1103	278	200	770	546	307	1001	452	1082	880	490	436	996	442	291	827	716	405	133	478	93	804	205	234	322	152	307	344	385	258	514	202	367	173	310	191	364	222	391	234	391	549	250	770
chr1_15886928_hg38	chr1	15884622	15889234	104	229	260	186	156	343	505	216	457	229	409	430	336	278	369	226	95	302	295	165	83	229	53	307	94	109	100	46	101	111	143	84	193	67	123	68	141	104	149	94	127	90	120	204	96	323
chr1_15938993_hg38	chr1	15933903	15944083	484	372	810	487	183	471	680	300	587	910	806	586	703	546	616	701	242	619	822	577	175	508	144	708	185	315	276	261	384	430	352	304	407	315	250	250	468	300	267	359	348	287	493	654	296	1192
chr1_15948963_hg38	chr1	15944220	15953706	601	571	1371	659	285	879	841	285	1089	1059	1000	823	863	720	1077	752	344	861	523	402	137	590	226	971	285	408	245	166	545	665	544	418	521	341	368	360	636	394	396	525	683	558	862	1225	533	2095
chr1_15958426_hg38	chr1	15956695	15960158	83	164	167	156	133	237	261	178	359	169	258	248	229	390	300	173	139	167	79	81	51	96	89	193	89	102	65	43	112	116	137	106	165	88	119	82	182	115	161	127	182	158	294	504	253	913
chr1_15966005_hg38	chr1	15961112	15970898	272	637	560	531	494	773	1158	492	1236	494	980	931	870	1386	1084	602	516	683	117	115	77	471	252	725	292	252	112	98	270	289	430	200	472	184	344	210	450	267	397	359	411	392	637	1062	543	1849
chr1_15974664_hg38	chr1	15972452	15976875	113	181	377	190	146	423	374	169	415	256	416	368	305	256	380	258	168	320	330	105	77	211	75	298	101	86	74	46	132	145	167	100	169	84	127	86	159	102	139	135	178	188	256	461	216	767
chr1_15994471_hg38	chr1	15993230	15995712	28	28	62	107	31	193	81	29	181	130	95	133	91	78	116	41	13	85	24	17	10	27	11	73	34	38	29	24	39	37	59	32	42	33	46	42	62	41	66	55	25	42	55	48	44	93
chr1_16017500_hg38	chr1	16012006	16022995	355	255	696	463	155	515	534	183	560	831	604	569	517	280	516	518	242	523	3693	2199	557	409	124	630	143	215	357	281	306	266	295	205	235	293	197	153	382	217	194	214	164	145	249	192	93	267
chr1_16042784_hg38	chr1	16035779	16049788	150	122	191	246	134	281	207	118	187	309	301	181	218	208	152	167	66	206	4061	3467	881	153	70	192	69	116	329	266	154	119	142	104	111	120	85	76	153	117	111	156	65	76	134	205	92	214
chr1_16058070_hg38	chr1	16056860	16059280	26	32	51	53	26	60	23	23	23	40	37	50	29	36	30	23	9	36	425	292	89	23	6	44	14	22	100	99	49	41	40	24	29	30	20	23	40	29	24	32	18	28	35	51	22	54
chr1_16068860_hg38	chr1	16059995	16077725	545	469	822	921	441	882	802	372	546	949	1073	659	742	633	449	827	371	765	5959	3818	1406	538	221	685	259	279	1610	1467	453	451	508	317	451	391	255	165	431	342	335	411	286	280	385	415	223	563
chr1_16079341_hg38	chr1	16078199	16080483	53	32	99	66	22	102	63	45	83	83	89	86	68	40	73	79	24	85	174	86	46	40	25	91	19	41	62	45	62	58	61	29	44	52	40	18	43	33	46	52	24	29	38	30	18	39
chr1_16143403_hg38	chr1	16139200	16147606	225	160	529	116	62	240	267	117	301	250	296	278	245	173	365	313	257	446	336	310	221	250	96	430	61	176	99	94	201	194	156	167	179	190	109	100	196	197	73	94	196	201	258	122	68	203
chr1_16153624_hg38	chr1	16149911	16157336	188	104	512	216	62	320	234	127	370	375	495	413	369	160	480	329	124	485	184	76	60	300	50	482	66	163	109	46	158	180	130	166	156	171	118	102	201	160	92	104	112	116	172	127	61	177
chr1_16175285_hg38	chr1	16172658	16177912	127	89	274	180	66	299	284	102	199	409	292	273	279	126	259	227	67	274	280	226	109	182	60	278	77	154	72	66	127	131	151	104	119	123	92	77	165	112	95	131	72	94	107	95	60	202
chr1_16208274_hg38	chr1	16205142	16211405	163	70	261	375	91	331	381	97	278	539	312	265	375	149	286	308	65	245	472	296	169	204	38	260	103	149	81	103	117	110	181	107	145	114	109	111	203	115	144	164	104	107	165	213	129	403
chr1_16226404_hg38	chr1	16225038	16227770	37	12	36	36	9	31	43	19	32	51	34	27	56	17	44	55	9	38	293	200	61	31	9	40	16	58	52	50	58	62	47	45	43	48	40	30	46	27	22	28	30	32	46	32	11	44
chr1_16237222_hg38	chr1	16235573	16238871	148	102	256	180	66	188	220	61	202	231	197	194	242	115	192	204	86	199	478	251	124	193	63	219	54	100	110	123	162	148	120	79	91	102	97	67	105	91	77	103	114	100	139	201	85	272
chr1_16247040_hg38	chr1	16241848	16252232	263	266	437	222	179	302	432	252	343	311	414	364	322	346	325	329	158	458	1465	689	417	401	142	454	199	223	231	203	280	324	335	223	307	225	179	182	299	229	235	290	131	120	189	203	123	277
chr1_16367956_hg38	chr1	16366516	16369396	110	73	400	140	49	280	271	95	347	252	357	318	220	130	365	212	76	294	378	121	48	194	30	259	78	119	107	64	116	146	137	124	184	97	114	98	124	110	129	119	132	123	174	195	118	355
chr1_16386677_hg38	chr1	16384926	16388428	87	94	166	72	130	185	198	104	185	71	154	215	74	121	180	123	101	143	461	180	169	91	64	152	55	73	136	100	100	99	110	66	90	79	61	51	101	78	101	106	127	143	217	293	177	557
chr1_16440870_hg38	chr1	16439339	16442400	141	121	324	204	60	347	190	83	265	250	288	291	214	153	289	216	101	244	381	151	42	154	40	278	83	131	123	75	133	146	150	93	165	109	125	65	113	96	116	112	119	131	157	229	114	378
chr1_16443701_hg38	chr1	16442542	16444860	35	36	71	30	25	91	45	60	34	56	77	64	35	47	60	34	34	56	60	23	19	52	21	74	18	32	22	39	39	54	46	48	41	47	31	31	51	50	33	49	25	23	50	40	30	83
chr1_16455159_hg38	chr1	16454188	16456130	32	19	31	16	11	22	25	28	18	31	24	20	18	16	14	29	12	23	40	29	10	21	11	28	26	47	25	19	41	36	43	47	38	33	21	35	57	39	50	39	59	96	98	164	137	299
chr1_16927139_hg38	chr1	16925217	16929061	132	74	155	148	34	117	226	64	118	317	144	218	195	95	104	210	27	120	288	184	137	184	40	163	40	79	64	59	69	99	60	43	44	76	41	37	99	53	33	55	28	30	38	32	18	85
chr1_16967344_hg38	chr1	16966029	16968660	58	34	96	112	41	112	106	43	98	137	126	110	91	53	105	70	40	99	82	74	11	52	12	86	36	58	43	49	66	38	75	48	49	50	52	36	96	57	48	65	34	30	86	84	30	157
chr1_16972303_hg38	chr1	16970262	16974344	97	72	147	88	53	89	72	54	90	114	116	110	86	76	76	128	15	108	514	318	93	76	21	91	27	70	84	84	68	70	54	53	73	61	37	40	71	51	34	49	54	29	71	55	23	114
chr1_16976344_hg38	chr1	16975247	16977442	50	32	69	54	17	62	62	40	57	58	63	65	62	49	69	45	18	60	100	101	36	40	18	44	22	53	33	30	50	41	29	20	23	34	14	24	41	32	28	27	13	21	39	25	13	75
chr1_17022547_hg38	chr1	17019623	17025471	213	260	369	74	125	201	166	97	118	92	169	109	95	103	98	203	94	184	70	53	18	147	59	214	53	88	68	56	173	178	105	91	111	120	70	62	124	94	70	154	160	77	130	80	28	110
chr1_17053732_hg38	chr1	17052408	17055055	143	106	259	131	61	226	199	73	196	183	252	200	182	91	218	186	72	179	356	74	48	147	38	172	50	89	90	78	102	115	110	64	66	74	78	49	115	59	81	82	185	115	151	172	108	272
chr1_17060407_hg38	chr1	17059309	17061505	66	120	149	46	100	122	189	80	158	58	169	135	104	102	163	89	99	139	43	23	19	65	52	108	37	31	36	35	50	62	63	34	43	24	43	31	61	35	54	74	113	123	117	201	102	288
chr1_17080590_hg38	chr1	17079518	17081661	43	60	67	75	86	154	90	67	140	102	144	123	97	104	129	68	31	84	91	71	44	43	16	73	35	49	87	96	54	42	59	35	59	45	36	42	72	43	66	78	35	31	71	140	67	240
chr1_17088934_hg38	chr1	17085395	17092473	350	511	628	754	565	1293	1199	451	1499	963	1394	1286	1043	1096	1354	776	486	832	108	73	66	426	220	792	305	250	191	112	274	294	454	235	535	174	284	261	434	285	436	535	272	276	538	985	523	1807
chr1_17208462_hg38	chr1	17206875	17210049	30	44	45	70	49	99	75	40	60	88	172	104	78	31	72	66	44	57	26	15	3	48	34	51	22	41	31	19	39	43	36	43	35	57	30	35	65	37	37	40	7	8	17	19	5	28
chr1_17235542_hg38	chr1	17232697	17238387	73	134	106	100	103	177	98	95	114	99	256	163	111	135	104	78	118	101	59	53	38	84	52	93	36	63	62	43	75	52	91	43	62	57	56	37	111	52	63	81	37	38	57	101	34	147
chr1_17245882_hg38	chr1	17244664	17247099	14	25	36	53	35	101	39	29	82	43	38	84	55	44	100	17	14	56	16	22	9	26	17	56	14	26	37	14	26	15	16	18	23	29	12	13	42	21	15	17	94	8	21	337	17	55
chr1_17409478_hg38	chr1	17407575	17411381	51	64	86	32	15	37	45	26	36	54	55	54	43	28	35	40	8	45	189	210	72	39	12	26	14	45	73	74	62	53	29	30	36	36	28	25	39	43	26	43	42	65	48	38	23	60
chr1_17422548_hg38	chr1	17417653	17427444	295	453	670	99	69	162	163	101	120	244	189	161	170	144	128	248	145	271	382	448	152	252	60	305	57	121	146	148	393	258	161	167	146	187	104	81	149	128	63	125	415	179	288	138	67	209
chr1_17432604_hg38	chr1	17431571	17433638	41	37	44	46	23	47	55	41	36	58	57	33	51	43	41	50	34	40	28	37	15	30	14	38	17	29	28	21	25	35	21	21	21	24	19	14	38	27	16	29	25	11	18	27	16	28
chr1_17438628_hg38	chr1	17435369	17441887	247	295	851	270	107	629	433	152	575	354	767	568	412	271	622	405	168	530	627	258	122	358	68	537	61	87	78	95	144	124	105	71	96	90	109	75	127	63	103	103	251	139	204	245	102	413
chr1_17532140_hg38	chr1	17530938	17533342	42	29	108	66	25	138	100	69	103	74	128	97	78	67	97	58	26	82	369	245	109	75	28	96	32	51	47	28	46	25	56	39	29	38	26	25	67	35	43	59	48	38	57	68	23	109
chr1_17539696_hg38	chr1	17537324	17542069	242	106	573	305	87	370	344	147	323	506	443	470	417	176	387	392	93	344	1349	569	153	287	60	370	70	164	248	245	154	148	142	115	100	142	87	94	128	102	94	117	163	142	179	173	84	337
chr1_17568628_hg38	chr1	17560134	17577123	809	698	1772	651	282	883	847	604	872	1085	1382	1356	762	767	999	807	393	936	4710	3581	1175	666	267	1017	195	412	901	698	643	434	367	304	334	441	248	211	540	319	228	342	357	430	552	451	299	1012
chr1_17580188_hg38	chr1	17579188	17581188	33	31	67	28	16	35	60	42	28	76	79	65	50	45	29	46	6	45	470	511	119	30	12	56	16	34	91	89	36	28	34	25	35	40	19	26	40	33	17	12	25	24	46	29	32	64
chr1_17618982_hg38	chr1	17617691	17620274	104	53	143	99	20	94	107	46	108	208	166	148	118	55	111	134	39	119	584	475	124	98	32	151	33	81	78	54	60	84	48	59	61	77	44	41	67	64	39	36	64	55	58	67	33	91
chr1_17647517_hg38	chr1	17644370	17650664	170	144	354	155	60	126	277	122	265	254	280	266	275	311	236	229	118	216	2073	2074	481	165	74	212	63	124	428	470	173	153	142	101	122	116	95	71	136	124	92	107	76	43	84	70	26	111
chr1_17654654_hg38	chr1	17650735	17658574	185	176	388	194	76	214	232	161	377	341	298	344	245	250	368	223	122	404	1662	1450	447	167	77	327	67	123	297	207	181	163	147	115	116	171	79	71	141	101	99	95	96	130	154	111	58	167
chr1_17683341_hg38	chr1	17681669	17685013	73	42	118	75	31	105	79	49	96	95	77	91	76	50	114	89	49	92	670	612	189	59	21	89	28	84	129	108	72	66	59	69	63	69	40	28	62	68	41	61	153	93	88	51	31	88
chr1_17691402_hg38	chr1	17686880	17695923	132	91	215	132	62	148	150	77	180	256	170	168	142	102	204	173	85	204	2073	1507	525	114	51	199	42	88	315	379	86	85	74	60	53	93	57	35	81	53	50	60	67	79	124	106	57	150
chr1_17744917_hg38	chr1	17743511	17746323	9	6	19	22	16	41	22	11	23	16	18	12	20	18	19	22	5	20	119	127	69	15	12	29	15	35	140	84	27	21	31	12	17	27	14	15	19	13	15	14	9	11	14	5	2	21
chr1_17775894_hg38	chr1	17774091	17777697	22	28	40	16	14	26	17	12	14	23	21	13	11	7	18	14	48	17	196	138	91	14	14	15	13	25	79	57	21	21	18	18	30	30	12	6	18	16	14	16	23	22	19	14	11	24
chr1_17819261_hg38	chr1	17818184	17820338	7	7	12	9	15	16	16	4	13	7	7	5	17	9	6	7	1	5	113	81	59	6	6	7	1	11	26	50	8	12	7	12	8	18	4	4	10	3	4	12	7	9	8	7	5	13
chr1_17829560_hg38	chr1	17828532	17830587	15	17	49	9	7	13	17	14	4	12	11	6	12	4	8	9	2	18	110	114	62	5	7	17	9	11	16	26	21	20	14	5	14	19	8	8	13	6	3	9	7	8	17	3	6	15
chr1_17890766_hg38	chr1	17889267	17892264	47	45	99	29	17	23	18	9	11	26	18	20	18	11	19	26	6	30	51	102	76	29	11	24	3	12	21	24	34	12	15	9	13	23	14	9	7	10	9	7	16	11	28	16	4	31
chr1_17966958_hg38	chr1	17965412	17968504	72	116	261	22	9	34	54	16	31	8	26	15	31	29	43	83	41	123	47	34	41	76	37	140	8	24	36	49	152	93	45	26	48	57	15	7	24	16	8	9	17	25	23	17	14	34
chr1_18008212_hg38	chr1	18005161	18011264	218	240	286	62	31	53	90	45	36	62	67	60	60	47	38	136	66	140	1207	1050	402	146	50	218	18	26	173	199	148	93	46	44	64	64	25	14	27	19	23	12	105	70	122	35	25	44
chr1_18047145_hg38	chr1	18045501	18048789	128	158	164	22	15	23	40	24	22	13	22	12	18	43	18	75	64	100	73	138	92	95	57	168	4	6	19	17	45	27	19	19	23	25	8	12	17	9	8	8	247	146	169	35	17	35
chr1_18072548_hg38	chr1	18070569	18074528	105	168	264	21	15	24	82	61	110	25	35	21	61	67	137	68	101	159	46	49	35	100	50	190	12	43	43	24	127	120	46	49	70	70	38	24	17	19	20	18	270	117	159	59	29	65
chr1_18109112_hg38	chr1	18104839	18113386	229	383	1173	145	87	228	182	115	246	238	506	321	171	128	298	297	263	617	1976	972	372	334	98	586	33	103	448	357	277	287	141	152	135	166	66	59	89	68	49	92	476	282	339	161	70	167
chr1_18118174_hg38	chr1	18114216	18122131	235	392	573	179	193	284	206	192	386	182	401	346	135	285	345	247	231	377	1163	739	549	191	152	295	57	88	286	303	273	178	156	100	132	133	63	44	116	73	86	128	152	111	159	144	57	224
chr1_18147034_hg38	chr1	18142756	18151313	248	245	521	89	78	148	140	77	122	145	146	121	93	96	98	189	100	180	1356	1157	617	122	47	174	27	74	200	302	206	158	88	82	87	108	46	32	90	61	31	56	146	130	172	118	73	214
chr1_18161326_hg38	chr1	18160240	18162413	63	58	91	62	28	82	85	46	57	75	147	74	64	55	75	85	31	80	118	43	70	72	36	90	8	28	32	35	50	36	25	36	27	33	26	18	29	19	20	21	13	18	28	20	14	20
chr1_18190956_hg38	chr1	18188510	18193402	201	237	309	81	74	132	76	75	78	138	197	100	83	70	71	207	52	185	1442	745	374	144	57	209	31	53	472	552	160	129	89	70	69	73	42	24	61	57	38	73	89	78	109	56	29	63
chr1_18198736_hg38	chr1	18195199	18202273	229	453	655	88	68	111	102	119	84	117	224	124	88	111	97	234	205	349	1384	880	565	228	91	338	31	66	265	283	294	243	131	101	137	104	33	24	65	54	30	61	184	105	160	57	39	87
chr1_18211480_hg38	chr1	18209271	18213688	151	189	270	29	33	48	100	61	46	66	68	45	68	41	66	102	58	115	770	547	274	113	44	148	18	30	167	260	110	97	63	43	63	62	37	16	34	13	18	29	120	54	70	38	23	37
chr1_18229087_hg38	chr1	18225849	18232325	248	384	609	100	173	203	130	91	262	136	257	278	74	124	209	170	170	353	643	266	274	171	103	312	92	82	193	207	327	238	206	105	207	85	98	61	155	103	114	100	217	147	190	103	70	178
chr1_18241832_hg38	chr1	18238369	18245295	155	304	638	33	36	84	83	41	49	50	49	48	47	56	81	110	115	219	946	404	386	117	51	245	24	35	390	314	268	173	70	73	101	82	36	21	55	26	42	46	170	121	136	64	38	74
chr1_18249676_hg38	chr1	18248365	18250986	49	64	109	7	9	17	22	12	9	34	20	16	21	14	9	41	28	45	405	163	129	24	14	47	6	13	89	101	74	28	13	16	20	18	7	6	8	8	8	7	59	40	48	19	13	27
chr1_18282356_hg38	chr1	18278126	18286586	211	249	450	39	28	75	80	35	49	63	69	48	56	49	79	123	60	226	1350	766	462	134	64	261	27	55	450	598	280	210	94	84	121	116	40	22	52	41	26	44	94	79	108	52	26	78
chr1_18302270_hg38	chr1	18301268	18303272	41	46	62	15	3	23	17	10	10	18	20	12	7	10	8	25	18	29	118	79	64	17	10	34	8	15	87	59	58	43	18	17	22	29	12	6	13	17	13	11	31	23	30	21	11	17
chr1_18326224_hg38	chr1	18321704	18330744	245	341	562	53	30	60	87	36	32	78	94	71	66	56	44	162	109	213	1234	812	360	211	68	246	19	50	570	658	336	228	94	90	126	116	32	21	59	49	30	39	221	153	203	65	59	77
chr1_18470692_hg38	chr1	18469503	18471882	18	11	20	10	11	13	15	13	10	13	21	13	7	12	8	14	27	6	58	65	34	9	4	14	6	15	12	17	14	23	14	7	11	15	7	10	17	21	10	9	7	5	15	7	2	15
chr1_18482054_hg38	chr1	18478946	18485163	43	15	101	40	23	50	47	19	35	61	66	61	45	16	59	35	18	42	384	289	117	43	11	47	22	44	90	77	54	60	42	27	42	67	28	24	43	50	21	30	21	41	47	23	19	72
chr1_18558188_hg38	chr1	18557024	18559352	38	49	86	21	6	25	43	28	57	25	30	26	39	25	71	43	53	51	112	154	60	45	18	41	9	31	15	16	56	42	15	29	32	29	12	8	14	12	12	9	15	34	21	17	11	18
chr1_18571537_hg38	chr1	18568612	18574462	81	80	131	22	11	42	42	30	19	48	31	23	25	33	25	48	22	51	799	725	387	35	18	39	8	21	49	84	63	38	35	37	30	45	19	23	23	24	15	25	49	41	32	24	15	31
chr1_18580724_hg38	chr1	18576002	18585446	108	145	187	76	23	90	65	41	53	80	75	55	58	52	65	95	83	153	977	1215	552	99	46	112	34	50	181	209	205	119	77	84	89	102	42	34	79	47	46	41	57	51	68	46	43	77
chr1_18693799_hg38	chr1	18692774	18694824	47	19	55	9	1	7	14	6	15	13	7	4	5	1	11	15	7	13	3	6	2	11	6	9	2	15	15	9	21	18	4	14	8	15	4	7	7	9	6	6	53	21	44	17	6	18
chr1_18703238_hg38	chr1	18702192	18704285	25	10	53	10	5	14	36	8	19	22	19	11	29	12	25	30	8	32	16	3	3	15	8	44	1	11	14	14	22	18	10	17	12	18	8	12	17	16	7	11	4	11	11	11	5	11
chr1_18819250_hg38	chr1	18816537	18821963	19	19	45	59	12	77	40	24	44	58	52	32	36	25	34	27	16	47	137	208	133	28	22	41	15	24	41	37	30	38	34	25	32	58	26	17	32	31	35	33	18	18	25	33	20	49
chr1_18869276_hg38	chr1	18868277	18870276	29	9	22	39	32	60	41	22	56	63	48	54	40	44	59	24	10	42	23	15	9	20	19	36	19	24	22	14	22	22	32	17	15	27	15	14	31	33	15	36	7	16	23	14	6	49
chr1_18883396_hg38	chr1	18881302	18885491	103	127	321	118	52	201	162	75	297	232	189	253	177	200	294	167	77	246	203	158	82	108	49	198	46	40	47	72	84	75	67	49	65	57	44	44	83	56	55	56	31	68	71	45	26	85
chr1_18902698_hg38	chr1	18901282	18904114	141	82	253	174	48	203	286	73	282	250	240	277	260	122	276	249	31	254	470	126	56	180	45	222	67	79	55	34	86	77	107	58	85	67	103	46	100	66	76	87	110	64	91	102	56	169
chr1_18907750_hg38	chr1	18906541	18908959	130	99	241	131	53	192	181	89	182	205	231	198	168	120	178	178	118	189	433	258	94	164	51	200	24	60	96	73	83	61	66	43	66	61	42	37	60	31	39	30	56	46	84	32	27	79
chr1_18922892_hg38	chr1	18916460	18929325	693	691	1636	780	376	911	822	482	1035	1341	1264	1115	899	812	1011	981	470	1179	3504	2789	861	635	276	1162	177	333	957	572	567	528	410	337	364	359	237	185	395	300	201	258	458	360	540	327	174	647
chr1_18944106_hg38	chr1	18935671	18952541	970	1186	1953	1642	925	2301	1712	1053	2759	2223	2839	2739	1731	2121	2485	1591	902	1994	3074	2336	1091	1010	548	1876	404	566	1248	664	727	650	840	440	785	532	476	320	776	531	709	600	550	560	918	1054	596	1985
chr1_18955772_hg38	chr1	18953270	18958275	247	181	739	364	123	475	485	136	498	496	545	504	477	228	451	464	87	481	1325	437	200	341	56	453	81	121	213	126	183	200	127	119	135	128	101	105	147	93	107	151	176	149	190	156	74	307
chr1_18997772_hg38	chr1	18996179	18999365	63	144	140	161	194	314	174	139	367	145	314	330	149	237	322	129	238	252	33	29	24	61	62	202	49	73	34	20	63	52	102	38	71	32	63	32	59	63	88	93	22	24	27	53	32	76
chr1_19010780_hg38	chr1	19009479	19012080	36	48	56	58	46	77	76	54	49	103	73	80	74	48	83	70	33	53	26	35	19	44	20	65	11	48	36	28	31	20	26	20	28	38	24	13	48	23	18	29	10	11	6	16	13	36
chr1_19068530_hg38	chr1	19065024	19072037	239	174	352	359	216	658	292	183	604	449	399	557	309	423	596	256	132	372	325	314	139	168	85	332	69	129	122	74	181	164	163	136	104	145	94	115	410	147	144	187	108	108	186	181	143	362
chr1_19074362_hg38	chr1	19072294	19076430	109	109	173	117	79	260	130	98	238	203	180	207	134	179	270	118	74	166	237	225	61	85	63	166	47	90	70	64	97	100	82	74	70	99	66	57	175	66	56	90	60	51	75	50	47	117
chr1_19081482_hg38	chr1	19079390	19083573	90	126	211	47	72	153	192	134	161	105	150	114	108	100	221	130	114	154	65	60	43	116	65	177	25	61	105	49	74	70	46	63	56	83	41	25	55	42	41	38	64	70	88	38	18	95
chr1_19088414_hg38	chr1	19085594	19091235	130	137	211	37	60	119	141	90	97	56	101	94	55	99	104	133	76	159	685	581	274	124	36	178	30	75	129	90	120	142	58	61	57	91	37	30	73	54	29	39	129	111	116	62	37	90
chr1_19113145_hg38	chr1	19111774	19114516	20	26	43	22	15	51	42	25	27	18	36	33	25	23	38	18	19	46	183	146	68	26	15	44	10	28	30	21	28	39	32	29	28	29	12	16	25	20	12	18	26	19	27	19	10	33
chr1_19140238_hg38	chr1	19138180	19142295	63	67	131	59	43	63	202	128	113	134	139	117	114	116	150	110	65	147	130	223	70	102	37	154	34	63	71	38	49	62	52	38	54	65	33	43	55	60	30	43	75	80	87	59	31	112
chr1_19157043_hg38	chr1	19155216	19158870	37	80	97	38	38	58	162	74	59	57	98	72	86	79	86	89	99	101	43	17	8	106	41	93	12	52	24	19	35	57	38	36	31	57	27	29	32	49	29	31	31	51	49	38	24	43
chr1_19232603_hg38	chr1	19231008	19234198	82	93	123	59	62	173	214	80	135	93	122	148	132	75	143	136	81	147	52	21	9	129	74	137	32	45	39	16	67	80	53	48	56	62	46	28	54	43	28	47	69	47	58	53	14	50
chr1_19240750_hg38	chr1	19239154	19242345	100	95	164	42	33	105	125	39	76	65	81	90	90	41	71	126	87	139	113	21	20	124	42	140	22	43	31	39	59	81	50	47	46	63	27	29	59	28	23	54	34	22	36	37	14	36
chr1_19251562_hg38	chr1	19250063	19253061	126	48	324	172	35	163	218	51	236	246	252	211	196	99	252	187	47	222	442	70	35	155	27	236	69	106	111	76	130	166	126	135	149	91	117	86	131	116	103	142	92	93	111	131	61	220
chr1_19273960_hg38	chr1	19272792	19275127	35	26	61	19	4	20	12	18	23	27	25	21	17	17	13	11	15	33	15	11	1	21	6	27	38	53	50	41	81	97	53	48	70	57	47	36	58	62	37	49	6	2	5	9	3	10
chr1_19314412_hg38	chr1	19310226	19318597	345	199	917	405	108	541	516	150	599	547	564	555	502	256	658	486	120	603	1652	684	382	358	101	557	178	211	528	339	339	314	281	166	260	245	199	151	261	185	228	210	210	179	274	276	147	487
chr1_19353331_hg38	chr1	19352331	19354331	42	58	102	39	24	68	72	50	95	79	90	75	49	58	88	79	34	96	95	175	43	58	26	98	23	26	53	31	71	66	71	68	70	73	33	32	55	33	34	46	80	59	96	77	38	139
chr1_19360493_hg38	chr1	19358594	19362392	52	86	104	89	66	116	85	52	90	89	106	104	66	108	78	86	38	109	496	661	168	71	36	119	33	53	144	122	72	68	87	58	75	63	56	36	88	57	63	77	57	63	114	115	64	219
chr1_19368585_hg38	chr1	19365551	19371619	242	273	385	433	272	558	435	231	624	457	518	596	438	527	514	312	240	463	258	364	261	237	121	428	175	197	160	73	238	189	343	163	324	135	198	153	332	197	290	290	168	197	351	479	254	899
chr1_19381558_hg38	chr1	19380568	19382548	35	44	63	72	82	112	89	44	86	90	72	86	91	92	79	57	20	81	40	53	40	52	11	62	40	33	62	47	50	32	96	45	51	34	43	28	79	32	61	80	53	51	84	99	42	182
chr1_19392608_hg38	chr1	19390730	19394486	124	104	180	159	74	229	182	103	135	204	315	189	163	145	206	152	95	174	138	110	28	136	61	217	60	96	83	30	107	114	115	90	97	101	81	68	134	75	80	81	71	72	109	102	49	203
chr1_19414629_hg38	chr1	19413291	19415967	65	156	172	74	107	145	183	121	143	96	178	169	83	123	132	111	97	140	169	139	85	107	54	148	46	67	96	93	96	78	88	60	76	51	52	51	122	60	63	77	74	65	93	98	36	162
chr1_19425950_hg38	chr1	19423791	19428110	138	175	238	224	188	335	384	210	268	240	338	321	215	313	222	248	125	204	118	126	93	179	90	268	108	105	96	47	139	124	165	107	131	85	104	55	176	88	129	124	61	71	102	129	59	272
chr1_19443388_hg38	chr1	19441716	19445060	119	119	186	180	123	203	231	151	237	156	258	205	188	260	199	151	140	183	41	57	69	155	70	183	34	77	39	22	59	69	77	50	57	61	53	29	82	52	49	71	50	50	74	62	40	115
chr1_19453402_hg38	chr1	19450362	19456442	202	351	435	267	280	444	446	318	479	307	568	476	369	413	476	378	351	440	157	113	87	339	158	407	209	208	131	74	229	260	348	196	331	184	233	142	320	204	261	286	124	101	195	187	87	302
chr1_19468086_hg38	chr1	19466531	19469642	106	83	149	97	67	165	176	98	110	158	188	147	126	124	123	174	159	179	183	234	96	124	50	164	51	66	83	73	74	90	108	72	75	88	51	42	98	47	71	97	72	74	97	103	45	176
chr1_19597004_hg38	chr1	19595173	19598836	155	180	482	145	60	229	304	88	259	290	292	299	253	116	327	257	168	285	625	184	121	227	75	285	73	103	114	120	150	176	150	107	128	92	106	65	104	91	106	84	263	172	224	222	136	367
chr1_19657352_hg38	chr1	19656355	19658349	26	20	54	46	9	44	45	15	36	60	40	34	41	21	55	40	21	42	21	26	7	38	12	41	15	29	37	23	38	75	44	44	36	65	23	32	29	30	22	22	29	26	49	36	23	73
chr1_19659774_hg38	chr1	19658694	19660854	35	41	80	54	26	43	70	26	77	47	78	68	66	45	81	52	30	72	61	60	25	53	19	59	17	23	21	16	34	36	38	28	28	26	28	23	23	20	17	27	26	34	33	21	16	59
chr1_19666067_hg38	chr1	19663996	19668138	82	53	189	50	10	40	112	44	232	70	66	40	115	65	317	158	4	124	45	9	4	117	16	178	28	92	49	30	73	109	48	66	72	76	94	74	35	29	28	29	53	46	82	31	17	44
chr1_19671870_hg38	chr1	19670813	19672927	45	31	98	9	15	19	36	63	125	26	11	19	33	69	176	47	82	73	12	5	6	41	24	80	17	20	16	18	42	55	30	26	37	31	45	26	12	6	9	11	81	54	63	13	14	32
chr1_19679888_hg38	chr1	19678383	19681394	41	26	66	30	7	14	68	59	142	20	20	7	59	63	201	49	10	45	19	16	5	32	12	43	11	29	26	25	31	39	19	23	30	39	48	21	12	9	16	12	22	23	39	16	10	39
chr1_19700461_hg38	chr1	19699402	19701520	13	8	23	58	19	34	46	26	22	46	33	16	32	16	40	35	4	18	12	10	7	24	4	22	4	16	13	10	16	26	17	17	22	18	16	9	16	9	7	14	13	16	20	12	0	17
chr1_19799590_hg38	chr1	19798047	19801132	104	38	112	85	26	87	191	62	81	162	120	101	165	55	93	118	50	92	31	9	8	110	37	87	40	70	29	15	80	75	70	55	58	76	68	51	70	66	48	42	34	26	33	32	14	64
chr1_19893688_hg38	chr1	19892614	19894762	24	52	39	21	29	35	77	55	71	24	52	29	26	40	73	28	18	56	21	11	8	36	15	73	27	27	26	13	33	36	34	13	32	23	28	15	47	18	37	32	45	27	36	57	39	79
chr1_19910776_hg38	chr1	19906605	19914946	170	405	283	76	93	176	185	139	183	91	122	149	138	220	158	126	98	204	97	57	49	150	62	184	40	85	71	54	101	111	73	75	75	81	41	64	101	84	51	105	136	81	132	88	42	122
chr1_19942044_hg38	chr1	19941016	19943072	13	25	27	7	16	30	89	23	41	15	28	17	29	58	29	20	13	28	9	2	4	28	19	27	11	35	15	15	20	23	14	21	24	15	11	38	21	31	16	32	13	19	10	9	4	7
chr1_20153682_hg38	chr1	20151217	20156148	164	165	323	143	61	220	176	109	153	181	258	207	144	106	220	199	154	219	98	16	35	231	46	292	32	76	44	30	104	109	70	58	57	78	46	52	62	48	39	59	156	100	148	83	48	133
chr1_20167920_hg38	chr1	20165532	20170308	183	311	526	55	31	84	132	98	110	87	146	83	125	135	120	183	158	235	73	26	107	188	102	322	31	50	53	66	222	198	61	52	60	90	36	22	34	24	13	27	386	232	311	63	38	75
chr1_20189212_hg38	chr1	20183459	20194964	387	759	1582	138	71	173	393	331	396	277	212	251	258	321	486	340	248	625	305	79	424	454	203	732	52	167	161	156	506	489	137	154	247	212	106	66	102	77	54	58	659	386	440	107	60	161
chr1_20201884_hg38	chr1	20200677	20203092	46	89	86	6	5	23	69	50	83	8	14	21	57	59	87	32	12	37	67	9	42	37	11	34	9	19	39	33	62	22	19	12	13	19	21	11	12	15	11	10	19	26	20	11	6	11
chr1_20212116_hg38	chr1	20209954	20214278	116	190	279	60	34	64	106	56	74	74	57	72	82	51	64	72	46	124	103	46	137	154	36	113	25	48	75	44	152	72	59	46	40	55	37	24	48	35	33	52	112	119	125	48	28	75
chr1_20353372_hg38	chr1	20347334	20359409	460	640	763	80	49	110	120	64	62	123	96	111	94	78	71	262	106	312	401	183	261	301	128	367	32	100	184	119	483	254	96	141	122	185	53	43	95	76	55	64	340	283	291	81	42	100
chr1_20362330_hg38	chr1	20361262	20363397	53	71	189	33	20	30	40	21	34	41	45	36	48	15	37	44	16	82	73	41	43	57	25	92	31	25	39	28	93	57	45	34	32	40	31	24	35	32	46	25	85	61	71	19	12	37
chr1_20366899_hg38	chr1	20365031	20368767	129	72	245	94	31	100	127	39	103	166	117	107	136	66	154	160	60	170	118	42	59	119	48	193	34	40	46	20	97	103	53	55	50	58	48	34	51	37	24	39	99	82	90	28	16	35
chr1_20386908_hg38	chr1	20385428	20388389	97	118	237	58	35	74	85	44	77	74	96	84	103	39	69	98	53	157	21	25	27	111	55	168	16	41	30	28	118	98	44	53	51	54	29	18	45	30	18	23	146	124	137	32	26	56
chr1_20403371_hg38	chr1	20399287	20407455	373	354	710	123	66	133	279	165	175	255	228	172	265	177	235	318	173	407	590	454	335	381	106	500	48	113	189	88	266	253	125	123	135	177	69	57	100	66	49	80	438	339	399	83	81	186
chr1_20411978_hg38	chr1	20409081	20414876	152	190	337	69	50	110	153	86	139	112	125	112	124	105	145	149	97	189	229	112	139	193	71	184	37	64	144	101	118	114	62	54	82	81	60	37	80	43	35	48	205	168	191	71	64	126
chr1_20429164_hg38	chr1	20426467	20431861	139	338	603	124	100	199	174	130	165	170	270	160	162	174	164	199	154	281	62	24	15	194	89	322	53	69	40	42	202	210	82	78	84	123	66	41	115	62	74	60	197	149	195	52	45	84
chr1_20441934_hg38	chr1	20440873	20442995	75	128	194	69	69	72	110	33	109	55	68	71	63	75	72	77	88	144	17	19	14	107	40	161	47	27	16	18	123	85	71	35	81	39	50	36	86	31	61	80	122	89	74	14	12	28
chr1_20448804_hg38	chr1	20447294	20450315	129	263	241	188	191	193	429	142	336	206	288	198	311	293	255	237	152	225	42	30	22	186	74	207	93	100	40	21	107	119	130	66	172	69	137	106	161	92	139	139	56	54	77	35	35	90
chr1_20472738_hg38	chr1	20471155	20474320	46	113	79	138	93	127	160	74	118	114	162	104	157	271	109	127	77	87	7	6	8	64	41	87	40	39	24	18	65	57	81	38	72	36	58	30	103	33	70	94	22	29	29	12	13	32
chr1_20478798_hg38	chr1	20474391	20483206	343	743	586	591	666	769	1038	470	857	703	1323	711	814	1175	699	707	591	659	121	64	70	477	249	626	401	316	155	59	414	473	675	347	839	264	497	381	634	382	661	577	196	163	184	73	58	114
chr1_20485872_hg38	chr1	20483450	20488294	343	228	1573	511	110	950	625	81	1252	742	1264	961	637	261	1137	726	244	1032	640	69	58	563	81	973	293	325	338	95	544	744	626	441	1031	335	565	405	489	413	650	480	423	253	314	174	103	275
chr1_20493210_hg38	chr1	20491119	20495302	161	239	476	182	117	224	190	125	258	184	229	203	186	223	201	193	147	304	89	57	83	212	79	320	100	95	69	38	228	191	205	105	150	112	103	84	191	87	134	175	210	174	185	77	57	92
chr1_20507992_hg38	chr1	20506478	20509506	105	74	220	124	18	128	174	47	132	197	133	154	200	67	179	151	44	156	407	117	69	111	24	152	59	66	48	44	80	95	75	50	67	60	60	42	74	48	40	66	90	68	75	101	40	123
chr1_20553982_hg38	chr1	20550709	20557254	171	157	692	67	26	131	188	74	213	167	226	243	155	79	284	240	35	335	632	176	89	232	32	391	42	75	308	140	213	246	111	128	120	145	73	45	57	60	40	43	170	131	144	55	41	88
chr1_20589248_hg38	chr1	20588194	20590301	21	32	100	26	8	42	48	25	63	47	75	46	52	34	72	49	11	90	12	11	5	27	23	60	12	33	24	12	36	40	30	32	34	48	22	17	30	41	19	21	29	30	51	26	13	33
chr1_20616371_hg38	chr1	20615253	20617489	43	84	108	12	12	30	55	33	30	14	46	43	30	40	34	41	22	51	88	95	59	45	21	77	13	39	21	24	59	50	30	35	24	45	20	14	31	23	12	20	44	41	54	27	18	40
chr1_20637032_hg38	chr1	20635955	20638109	40	48	120	25	13	44	43	29	67	62	66	57	73	32	71	65	46	94	47	21	22	65	16	110	16	46	54	25	86	68	57	41	34	47	44	20	37	26	27	35	53	37	60	51	25	68
chr1_20663528_hg38	chr1	20659752	20667304	270	130	446	241	79	263	390	155	383	409	316	332	359	151	384	349	88	337	657	150	123	279	63	350	137	193	153	181	214	235	293	198	299	207	212	140	271	162	178	185	184	133	193	226	113	355
chr1_20684968_hg38	chr1	20683045	20686890	194	108	370	97	30	135	219	91	205	176	224	133	256	113	242	236	66	378	40	28	13	201	59	387	46	105	67	30	159	245	139	131	191	153	115	78	134	71	43	56	166	89	149	76	42	141
chr1_20697084_hg38	chr1	20695055	20699112	186	161	433	214	47	366	261	107	299	212	279	243	236	124	377	256	93	319	427	115	46	226	63	349	63	94	43	46	124	161	109	89	123	99	95	51	96	59	47	78	243	198	230	181	111	363
chr1_20717990_hg38	chr1	20716877	20719103	80	9	88	89	9	97	77	13	81	75	56	65	82	23	70	83	12	72	29	11	1	69	16	64	13	50	14	20	45	45	23	26	26	30	40	32	42	29	37	30	33	25	31	14	17	50
chr1_20732028_hg38	chr1	20729021	20735035	254	188	641	245	73	477	289	95	405	282	233	275	293	181	508	347	142	403	162	83	57	323	72	470	87	162	73	78	187	224	175	124	128	167	142	127	223	131	82	158	169	125	208	111	62	210
chr1_20781926_hg38	chr1	20779443	20784408	59	121	89	111	184	201	329	154	187	126	178	148	170	236	172	126	107	127	41	26	22	107	39	128	20	37	27	23	38	35	42	26	37	40	36	27	51	36	29	49	43	39	48	73	44	113
chr1_20838099_hg38	chr1	20836403	20839795	35	61	49	73	102	124	197	92	81	60	116	86	101	93	79	67	88	71	26	29	26	39	33	54	42	50	31	24	51	43	52	33	52	46	34	46	85	62	48	65	20	17	27	31	13	50
chr1_21003664_hg38	chr1	21002664	21004663	8	20	12	10	38	24	52	35	17	22	15	23	28	25	19	16	7	19	10	9	7	14	8	26	27	18	14	10	27	16	52	16	37	24	26	17	63	26	31	44	9	15	16	16	7	30
chr1_21006024_hg38	chr1	21004912	21007136	5	32	12	23	43	29	76	43	23	22	27	16	22	21	18	10	7	22	4	5	2	22	16	19	27	29	3	9	21	24	48	18	42	14	28	22	52	30	38	34	24	27	19	30	14	21
chr1_21012966_hg38	chr1	21011966	21013965	14	20	35	16	29	44	54	28	34	23	33	38	17	22	33	21	16	40	11	3	5	33	10	38	19	26	21	12	35	14	43	24	35	21	18	32	63	21	27	38	41	23	34	27	21	43
chr1_21035240_hg38	chr1	21033996	21036484	57	23	91	77	23	107	87	33	76	123	83	83	76	38	92	82	37	71	86	24	5	50	12	104	26	33	37	27	44	47	55	38	40	41	54	42	61	38	35	64	70	59	96	122	58	180
chr1_21261550_hg38	chr1	21259126	21263973	254	215	584	288	121	302	310	165	414	334	410	306	364	298	504	312	182	430	52	54	28	265	118	447	108	163	63	33	216	200	209	150	156	172	137	100	157	141	109	134	122	101	210	117	68	197
chr1_21268877_hg38	chr1	21267501	21270253	60	78	92	43	47	69	83	63	80	71	89	65	79	93	70	74	46	84	130	104	60	66	24	86	26	59	73	74	64	59	50	46	41	73	37	32	77	61	30	43	36	53	63	43	28	59
chr1_21278740_hg38	chr1	21276266	21281215	187	226	419	328	234	351	421	220	523	326	491	364	446	420	543	301	242	397	39	43	32	256	110	401	97	171	62	42	170	178	172	155	184	140	127	102	230	144	122	148	111	115	156	100	63	197
chr1_21310842_hg38	chr1	21307125	21314558	294	359	624	463	342	591	517	339	742	495	674	655	511	611	606	425	299	490	79	47	48	307	158	529	134	200	93	77	261	243	249	160	219	170	159	131	309	183	183	225	166	175	266	137	110	350
chr1_21318636_hg38	chr1	21316578	21320693	206	201	356	239	164	325	260	185	346	221	362	315	241	302	353	219	132	278	40	32	21	191	84	297	67	121	41	42	134	136	141	90	104	120	75	75	155	69	86	100	83	99	168	112	65	186
chr1_21324844_hg38	chr1	21321515	21328174	436	510	1164	382	239	477	461	306	653	379	569	423	415	474	623	458	259	558	83	19	45	452	163	689	92	219	86	53	371	402	233	205	213	276	173	125	263	183	114	152	332	320	375	133	97	341
chr1_21335298_hg38	chr1	21333978	21336617	186	166	475	223	77	330	227	123	379	347	318	335	257	194	361	276	132	346	23	20	14	213	46	370	84	126	45	28	180	169	159	109	146	140	105	80	159	89	122	144	66	85	103	53	35	136
chr1_21356076_hg38	chr1	21355078	21357075	9	28	39	23	19	24	30	19	35	28	28	32	28	26	42	15	11	25	6	3	3	6	9	30	21	12	22	9	23	14	29	12	25	19	17	12	36	14	22	19	24	16	27	18	6	28
chr1_21509378_hg38	chr1	21507712	21511044	57	46	132	69	23	190	88	38	125	112	129	98	93	38	125	111	34	124	81	18	16	93	28	147	38	68	42	25	73	84	78	55	83	89	63	42	90	63	37	66	35	50	67	40	30	75
chr1_21539857_hg38	chr1	21536548	21543166	111	78	201	117	52	212	153	94	142	182	218	185	148	126	184	154	105	243	64	90	59	136	76	262	72	121	165	130	136	140	151	132	121	145	94	76	193	119	98	109	65	99	157	128	68	264
chr1_21622618_hg38	chr1	21619256	21625980	367	260	734	428	183	711	446	203	706	547	444	437	636	420	782	480	219	501	377	214	128	320	109	578	209	252	208	123	319	292	381	254	339	205	271	224	405	208	314	305	160	169	295	288	157	589
chr1_21633200_hg38	chr1	21630210	21636190	234	190	440	334	167	411	416	162	615	449	319	331	482	345	606	346	124	328	106	88	53	241	69	334	176	214	149	66	199	288	368	197	291	195	228	233	433	229	246	317	155	170	301	349	210	729
chr1_21640470_hg38	chr1	21637953	21642988	191	158	645	173	58	244	230	120	401	191	200	185	212	191	368	206	62	312	174	141	82	151	64	261	88	143	156	91	145	144	199	119	186	139	117	138	229	102	118	167	117	137	192	166	109	398
chr1_21646248_hg38	chr1	21644855	21647642	96	78	199	89	49	182	144	66	243	97	125	180	122	132	273	129	89	157	52	37	32	82	43	146	44	70	58	33	78	75	108	67	120	58	69	50	130	76	78	83	49	66	106	117	53	234
chr1_21652846_hg38	chr1	21647935	21657756	407	433	1132	631	266	1519	741	360	1893	811	1164	1153	859	899	1877	758	297	1087	320	254	135	481	185	1048	364	393	270	166	469	486	673	380	809	315	526	422	742	386	614	535	330	315	566	733	382	1424
chr1_21668496_hg38	chr1	21662550	21674443	553	431	1697	395	162	679	511	261	852	469	453	416	446	349	982	598	206	864	2535	1153	527	512	133	851	164	263	778	681	583	538	334	283	320	322	384	193	305	201	210	244	450	363	448	215	110	361
chr1_21765050_hg38	chr1	21763629	21766472	36	53	80	80	80	133	134	89	112	55	105	88	105	121	122	66	43	75	43	19	20	61	20	69	36	43	35	14	45	41	49	42	30	27	26	44	62	46	38	48	40	39	45	68	37	152
chr1_21775950_hg38	chr1	21773884	21778016	47	94	115	108	110	216	192	86	239	106	183	197	116	198	205	104	69	156	34	17	13	63	31	139	71	70	44	22	76	58	94	57	129	43	76	69	125	72	120	104	16	19	20	25	10	26
chr1_21814591_hg38	chr1	21813558	21815624	39	18	58	26	9	39	38	8	29	44	29	35	54	35	39	33	6	30	14	7	3	23	1	38	11	19	15	10	20	19	20	9	16	21	25	14	24	14	15	17	11	16	14	12	8	34
chr1_21870275_hg38	chr1	21868874	21871676	45	31	67	144	54	147	98	27	133	157	107	107	98	44	113	98	40	82	26	11	7	42	26	78	44	61	22	24	52	38	75	35	50	62	60	44	88	80	52	86	15	6	23	30	10	38
chr1_21936974_hg38	chr1	21932750	21941198	244	234	568	411	164	476	462	198	489	489	486	477	494	405	486	384	174	407	66	41	20	272	99	358	133	225	98	34	198	214	230	163	223	191	196	180	297	254	205	258	118	124	226	264	138	440
chr1_22038420_hg38	chr1	22037039	22039802	29	62	52	102	71	115	102	69	93	62	116	84	84	110	75	59	49	61	14	14	18	45	20	58	11	55	13	19	32	38	34	25	28	30	13	20	47	32	18	44	8	18	22	22	24	57
chr1_22108670_hg38	chr1	22107514	22109825	59	65	63	122	74	140	116	66	140	78	95	115	137	106	125	98	55	90	16	26	18	57	47	77	45	71	30	28	60	53	79	53	76	49	66	51	90	48	66	83	41	51	76	93	73	244
chr1_22115164_hg38	chr1	22110433	22119895	254	239	479	533	358	1141	700	297	1030	557	650	898	605	595	919	478	282	588	121	74	69	316	154	565	306	379	155	103	302	385	498	284	486	247	352	316	714	354	448	551	202	291	476	642	452	1630
chr1_22122218_hg38	chr1	22120573	22123862	127	126	143	243	114	284	220	108	270	252	192	225	263	203	203	211	90	151	34	30	16	115	45	161	78	96	47	36	107	130	144	75	115	79	77	76	180	94	119	166	38	55	80	103	77	260
chr1_22126856_hg38	chr1	22125452	22128259	65	35	81	94	42	148	90	45	120	107	72	101	76	96	126	45	39	82	28	15	8	66	21	113	62	50	35	23	66	56	97	42	74	54	48	41	121	51	101	99	18	20	41	47	32	69
chr1_22342346_hg38	chr1	22341278	22343413	28	15	83	23	8	46	46	13	23	34	31	21	24	10	20	29	12	46	15	2	4	21	15	48	12	28	20	16	35	41	25	31	21	33	24	11	24	24	22	29	10	18	26	25	17	42
chr1_22416900_hg38	chr1	22415772	22418029	22	31	54	27	11	40	27	18	35	34	32	30	40	28	43	29	26	44	13	9	4	22	13	49	13	19	18	13	18	25	29	16	13	28	17	15	22	21	15	26	24	24	40	31	34	60
chr1_22419058_hg38	chr1	22418054	22420063	15	22	30	10	7	31	30	32	30	5	35	21	12	18	22	21	11	47	14	3	9	20	22	29	8	15	17	19	31	39	23	17	16	36	19	19	22	15	18	17	21	21	24	23	8	30
chr1_22452505_hg38	chr1	22449667	22455343	157	234	461	228	131	365	429	182	384	319	433	404	351	228	418	311	81	415	487	192	124	326	91	379	83	148	110	108	148	181	161	136	207	84	120	93	165	141	147	112	209	164	293	268	157	512
chr1_22529200_hg38	chr1	22524968	22533431	163	211	305	61	46	91	175	123	119	82	136	78	124	113	155	125	152	151	135	130	59	153	63	220	49	114	86	156	78	104	86	73	88	114	73	70	108	81	53	80	69	77	117	84	63	199
chr1_22537552_hg38	chr1	22536093	22539010	72	74	136	44	22	48	57	31	33	61	50	46	51	50	40	59	20	50	14	14	10	60	20	100	31	52	21	31	47	49	62	43	34	41	43	34	52	52	39	51	17	10	13	16	14	39
chr1_22637982_hg38	chr1	22635917	22640048	49	61	132	51	23	109	79	53	121	103	196	161	61	59	168	99	80	123	28	27	10	89	25	110	31	45	33	30	47	49	56	35	57	49	63	31	52	38	24	31	38	35	67	27	21	86
chr1_22644620_hg38	chr1	22640635	22648604	110	81	241	138	53	288	180	99	242	258	439	329	165	98	301	192	74	234	90	27	15	195	48	255	80	109	89	47	110	95	121	100	124	112	126	67	92	77	117	67	59	70	114	89	53	169
chr1_22710698_hg38	chr1	22706992	22714404	314	203	597	444	158	601	409	114	301	516	422	377	393	197	311	452	95	391	157	59	35	325	62	338	93	78	108	83	226	147	184	118	132	137	93	50	146	120	131	108	127	118	174	190	118	406
chr1_22723265_hg38	chr1	22722149	22724381	70	63	97	105	56	141	53	41	55	89	87	108	51	42	25	44	42	67	17	14	7	36	20	47	23	11	29	29	64	26	55	19	40	33	18	11	50	40	38	55	25	30	41	48	29	89
chr1_22761968_hg38	chr1	22759766	22764169	245	234	535	420	253	635	243	90	392	428	390	554	249	250	308	281	142	417	34	33	16	123	74	286	95	83	77	47	206	143	252	106	190	73	127	53	166	168	189	180	205	210	301	479	330	801
chr1_22767484_hg38	chr1	22766412	22768555	132	134	289	124	79	168	50	35	88	95	116	134	47	60	77	72	27	112	15	5	4	53	25	97	24	22	25	15	85	36	58	22	35	29	26	10	47	36	41	40	53	54	86	107	68	185
chr1_22778926_hg38	chr1	22777689	22780162	78	114	192	175	153	342	137	81	187	188	219	232	124	134	198	115	118	203	17	7	5	79	41	130	37	37	20	17	79	44	86	45	62	38	40	18	104	83	56	63	54	65	105	129	82	262
chr1_22801963_hg38	chr1	22800619	22803307	126	76	185	319	111	407	158	69	203	412	293	278	214	135	167	203	78	224	15	12	5	92	42	191	39	42	43	22	94	61	102	56	74	47	53	32	107	67	54	82	80	125	183	336	175	554
chr1_22807238_hg38	chr1	22804322	22810155	321	414	600	607	443	1087	619	300	1005	666	1122	1049	543	716	796	545	442	795	80	43	31	269	187	687	217	171	114	61	285	242	371	185	415	153	242	137	377	265	346	355	179	227	360	634	393	1238
chr1_22816691_hg38	chr1	22813860	22819522	377	335	578	463	211	717	257	92	359	452	372	417	270	227	298	401	221	551	49	27	16	236	94	509	101	76	60	38	283	231	221	120	192	139	68	40	163	146	135	170	236	192	264	309	196	510
chr1_22853392_hg38	chr1	22849355	22857428	371	413	636	859	476	995	637	285	890	891	967	1008	624	688	689	651	382	768	105	71	53	243	150	574	35	68	73	68	168	145	122	63	110	110	58	39	95	97	74	85	131	140	227	286	144	436
chr1_22860468_hg38	chr1	22859224	22861713	99	126	238	186	105	252	111	57	149	140	157	161	99	122	126	121	71	182	30	15	16	77	41	157	15	28	17	11	90	43	59	25	43	42	14	17	41	22	20	40	43	51	65	78	46	165
chr1_22876487_hg38	chr1	22875351	22877623	85	38	152	129	72	180	111	38	91	115	119	69	119	60	109	64	44	103	12	3	4	54	20	73	14	39	17	22	68	40	27	33	23	37	27	17	29	33	26	23	18	28	36	43	18	70
chr1_22915380_hg38	chr1	22912393	22918367	249	183	357	248	120	299	176	77	106	221	171	171	133	83	139	217	78	268	62	59	21	143	37	275	40	106	71	95	165	184	97	115	115	118	70	50	95	88	66	81	78	121	142	87	71	162
chr1_23080317_hg38	chr1	23079318	23081316	15	57	46	7	19	26	41	36	22	15	30	32	28	21	37	25	5	59	26	19	20	34	16	58	10	39	32	30	44	35	24	21	31	43	13	6	14	25	11	16	51	46	39	26	15	29
chr1_23085077_hg38	chr1	23083303	23086851	64	128	156	34	25	48	138	89	84	23	86	57	49	47	75	81	48	149	49	20	12	126	34	131	20	35	45	35	65	62	44	29	40	41	18	27	35	28	14	26	136	84	115	49	26	72
chr1_23091236_hg38	chr1	23090000	23092473	60	53	73	25	9	24	57	39	38	38	57	34	49	36	28	53	25	76	31	25	14	69	25	81	18	31	40	27	52	62	38	41	39	55	21	19	25	28	26	26	51	39	61	30	15	47
chr1_23111986_hg38	chr1	23108285	23115688	86	221	271	84	112	148	285	156	119	93	219	128	121	187	152	136	78	181	67	52	40	216	64	194	32	73	64	38	117	105	95	85	76	98	55	51	102	70	40	51	69	71	70	65	48	113
chr1_23177234_hg38	chr1	23174523	23179946	195	346	614	113	60	142	288	148	234	208	294	221	215	158	268	287	198	392	463	294	96	278	97	442	34	102	205	153	212	267	122	143	123	135	88	75	111	108	51	55	189	177	168	69	45	121
chr1_23184670_hg38	chr1	23183613	23185727	28	55	50	18	12	55	48	50	47	15	50	59	31	29	50	29	33	64	10	13	6	34	26	56	14	22	17	15	38	17	38	11	19	25	19	13	19	10	16	20	27	15	25	26	11	46
chr1_23217414_hg38	chr1	23216158	23218670	39	9	52	31	6	31	92	19	62	40	43	18	79	23	77	31	17	36	18	8	1	39	12	35	12	28	10	14	25	19	18	14	14	24	28	19	24	18	14	13	8	6	11	7	2	18
chr1_23344341_hg38	chr1	23342502	23346180	182	134	477	216	61	354	410	109	416	317	459	369	366	138	434	327	112	341	707	161	93	280	42	369	96	135	139	97	154	182	179	143	185	106	161	103	162	140	138	147	122	95	133	175	74	259
chr1_23356925_hg38	chr1	23354782	23359068	39	112	129	123	157	258	279	108	271	103	188	229	168	177	287	92	124	182	31	15	30	146	85	192	74	81	21	30	59	74	106	64	96	58	87	82	125	71	98	111	31	18	30	26	9	36
chr1_23369987_hg38	chr1	23366680	23373294	372	391	1305	408	146	753	668	264	891	589	916	838	591	366	1007	632	245	759	1026	303	160	607	113	854	182	245	209	163	313	414	351	230	381	208	280	179	331	214	243	290	465	360	447	461	241	735
chr1_23395046_hg38	chr1	23393481	23396612	66	111	186	31	46	60	89	72	61	91	98	79	76	95	84	73	46	91	37	8	17	76	31	76	9	18	10	9	16	15	18	14	16	20	12	10	27	12	11	21	45	49	50	17	23	63
chr1_23403988_hg38	chr1	23402901	23405075	47	79	124	44	28	92	92	65	110	64	114	93	65	80	90	45	45	90	74	37	26	85	16	84	21	43	32	27	46	41	62	32	40	36	46	24	37	26	40	61	27	29	43	32	13	71
chr1_23417708_hg38	chr1	23416873	23418542	9	15	21	17	18	31	25	16	16	15	16	14	13	24	10	18	11	15	75	31	30	21	9	20	11	21	42	8	8	12	19	16	12	18	8	12	22	15	14	24	5	8	8	12	7	17
chr1_23423583_hg38	chr1	23421038	23426128	112	105	191	202	95	157	278	97	187	238	210	153	229	167	198	159	87	181	73	32	41	158	49	153	77	110	46	21	118	94	124	97	102	110	90	82	169	69	86	154	27	28	47	49	29	90
chr1_23451981_hg38	chr1	23450980	23452982	49	34	67	21	22	57	25	36	59	78	53	72	37	39	47	38	28	61	15	12	4	38	24	49	23	49	19	19	44	47	52	29	37	52	47	29	77	39	40	46	27	30	45	58	36	109
chr1_23531586_hg38	chr1	23530428	23532745	66	70	109	97	34	97	128	74	65	111	147	105	109	58	92	71	99	81	66	39	20	72	16	97	26	57	34	17	51	72	62	41	41	58	44	33	56	33	51	54	31	13	40	46	28	87
chr1_23577326_hg38	chr1	23575811	23578842	80	168	284	21	84	112	149	121	171	49	144	114	79	89	156	77	156	181	17	5	7	143	73	177	42	75	30	32	112	95	61	61	92	72	46	32	100	63	47	45	96	72	110	66	36	147
chr1_23635031_hg38	chr1	23633709	23636353	60	72	149	83	45	134	147	80	193	129	187	190	121	145	213	100	95	140	22	11	8	88	43	142	26	45	20	20	47	53	53	22	37	45	36	24	73	44	32	60	45	50	72	78	65	161
chr1_23637748_hg38	chr1	23636435	23639060	35	50	124	72	24	70	66	39	78	84	89	102	87	75	71	44	46	62	14	9	3	47	19	83	22	44	14	13	48	34	38	27	32	27	28	15	40	29	29	41	24	25	44	56	42	124
chr1_23743702_hg38	chr1	23741670	23745735	125	99	372	215	90	258	369	100	315	344	334	289	301	130	348	281	105	297	538	230	89	237	38	335	84	109	106	84	132	157	134	113	144	109	128	94	127	102	120	109	100	88	127	119	81	183
chr1_23778514_hg38	chr1	23776885	23780142	156	132	287	188	59	221	224	82	225	234	200	189	250	112	250	213	88	214	477	149	59	194	38	192	73	82	100	105	126	153	118	88	102	105	81	51	126	73	90	112	158	105	125	151	60	208
chr1_23793224_hg38	chr1	23790320	23796128	266	130	463	245	86	335	320	115	336	460	387	356	339	177	419	368	159	363	518	243	96	251	47	317	110	180	172	127	227	269	205	191	222	159	182	165	237	167	141	243	174	157	248	278	131	488
chr1_23800714_hg38	chr1	23798050	23803377	240	155	621	371	75	392	414	117	486	579	482	425	469	170	557	415	112	476	911	274	93	312	57	454	127	185	196	161	239	286	243	227	302	200	189	145	246	211	200	201	270	235	301	266	166	454
chr1_23825309_hg38	chr1	23823599	23827019	159	146	359	180	114	253	284	92	261	219	291	224	251	184	249	229	145	273	421	187	74	198	70	256	68	132	90	72	115	179	123	128	141	99	120	98	125	138	114	101	140	144	189	184	108	305
chr1_23867929_hg38	chr1	23865938	23869920	180	114	459	200	72	297	300	72	245	298	276	299	256	131	269	264	93	336	530	95	87	198	47	286	58	84	58	51	111	112	108	67	92	77	98	55	116	92	89	102	193	141	216	221	121	367
chr1_23903040_hg38	chr1	23901913	23904166	51	20	75	56	4	51	47	9	30	50	39	42	57	21	46	47	3	56	95	35	14	44	9	47	13	41	28	16	34	58	37	37	28	46	28	17	36	28	19	25	10	9	3	1	3	11
chr1_23976885_hg38	chr1	23975388	23978382	16	54	72	32	71	109	119	34	64	35	52	52	37	28	61	34	51	72	69	22	25	69	37	70	14	36	31	20	46	45	40	32	34	31	38	34	52	47	32	58	63	50	55	97	40	111
chr1_23980190_hg38	chr1	23978579	23981802	140	99	409	159	76	262	304	79	307	203	339	284	219	139	308	217	126	267	467	176	100	224	37	297	70	100	101	96	151	178	138	117	173	100	132	88	125	95	116	108	180	147	159	210	109	338
chr1_24020558_hg38	chr1	24017660	24023456	99	156	193	39	35	61	179	121	105	56	105	76	139	110	143	112	69	163	30	10	12	149	61	179	21	62	39	36	107	80	51	56	58	75	37	42	59	55	12	33	95	105	90	63	29	86
chr1_24066958_hg38	chr1	24065940	24067977	9	9	4	14	11	14	14	16	5	13	5	11	11	4	8	8	14	3	18	6	5	8	4	5	8	9	38	54	9	11	13	9	10	16	7	7	16	11	3	9	2	2	7	7	2	11
chr1_24107986_hg38	chr1	24106646	24109325	14	15	71	49	19	62	27	15	26	70	34	35	30	15	27	26	18	31	15	16	10	28	9	33	21	41	35	20	62	20	48	33	33	32	17	15	47	34	44	57	39	51	71	24	20	40
chr1_24111806_hg38	chr1	24110129	24113483	35	21	80	59	25	91	44	32	38	96	55	73	47	24	34	43	38	54	39	49	33	36	10	54	26	47	39	26	95	67	84	51	55	67	37	24	74	60	61	45	110	98	97	68	42	117
chr1_24150644_hg38	chr1	24149511	24151776	15	23	45	35	20	44	57	45	82	29	30	30	56	48	144	32	0	28	117	112	76	13	9	30	13	20	18	17	16	21	17	16	12	20	20	16	22	13	11	27	18	10	13	9	6	21
chr1_24157368_hg38	chr1	24155023	24159712	40	29	36	54	14	57	44	28	38	50	51	35	41	36	31	29	19	37	1649	761	353	25	20	34	16	20	105	141	21	33	30	18	28	29	15	13	26	19	16	21	18	22	25	31	17	46
chr1_24187342_hg38	chr1	24185816	24188868	95	52	145	109	54	139	119	31	85	182	141	115	154	37	115	103	26	82	824	430	147	95	21	82	22	48	79	61	53	43	26	36	35	46	29	24	41	35	20	36	25	24	22	21	4	29
chr1_24195982_hg38	chr1	24194972	24196992	9	11	17	43	9	38	43	20	28	37	33	27	36	24	29	22	6	17	28	75	65	19	3	19	7	19	11	8	12	12	12	7	13	18	3	9	12	18	4	17	6	10	12	7	5	8
chr1_24204164_hg38	chr1	24198537	24209792	127	112	291	207	134	474	242	136	427	243	179	326	214	184	379	180	91	261	1758	1405	833	129	74	255	55	80	371	256	105	100	110	68	96	79	64	61	104	79	83	103	59	75	77	93	53	126
chr1_24216640_hg38	chr1	24213496	24219784	25	31	46	51	37	87	49	39	80	35	40	64	42	34	83	34	50	62	718	515	382	30	19	45	19	41	117	116	29	38	30	29	30	54	24	22	37	30	23	29	20	23	29	27	15	38
chr1_24290288_hg38	chr1	24288106	24292471	81	72	265	136	99	268	181	99	343	129	164	273	174	150	376	127	69	242	54	37	44	80	37	242	23	30	43	30	20	18	31	18	23	32	25	14	53	24	25	39	20	22	26	24	13	40
chr1_24322374_hg38	chr1	24320938	24323810	78	49	120	137	35	195	170	39	166	178	139	153	180	52	163	102	36	119	161	141	78	87	19	116	31	65	23	10	38	40	56	30	33	49	60	28	54	47	44	49	48	47	41	37	28	72
chr1_24343640_hg38	chr1	24341896	24345384	31	25	65	105	32	115	74	51	142	94	78	91	102	96	153	55	28	96	307	297	150	40	10	77	29	54	42	25	34	51	55	40	54	50	21	43	85	43	29	57	17	21	27	40	13	66
chr1_24347636_hg38	chr1	24346445	24348828	33	18	25	31	17	37	33	15	30	40	28	29	28	21	34	26	11	19	287	245	113	22	9	28	17	27	39	34	26	29	31	19	29	37	17	13	47	33	18	29	10	5	19	11	5	19
chr1_24364026_hg38	chr1	24362189	24365862	86	95	192	38	42	89	106	71	96	64	90	120	62	61	91	79	43	98	170	61	169	70	32	79	17	39	34	25	65	46	44	25	37	48	37	22	65	28	21	26	12	10	16	24	11	23
chr1_24374982_hg38	chr1	24371398	24378567	62	49	56	62	48	86	80	58	55	55	68	81	43	54	72	36	12	64	1444	836	502	35	31	53	22	56	128	203	55	39	30	23	25	41	28	31	62	55	45	53	9	24	33	20	16	46
chr1_24392770_hg38	chr1	24390585	24394956	79	189	258	101	126	303	256	127	269	95	262	263	143	164	283	134	121	221	512	267	200	140	68	189	58	66	64	51	84	86	105	57	63	63	60	47	102	74	91	104	101	86	89	77	47	85
chr1_24439735_hg38	chr1	24434841	24444629	184	472	322	387	593	705	875	355	946	412	905	813	572	815	747	494	396	544	1296	830	491	287	187	504	188	166	228	112	182	177	316	145	313	102	213	179	403	190	290	306	92	66	136	388	111	601
chr1_24509082_hg38	chr1	24500632	24517532	171	231	357	399	402	679	590	256	654	444	496	514	500	549	581	365	193	425	2040	1932	823	232	107	408	120	134	443	405	160	141	224	116	186	110	146	123	243	138	194	194	209	182	243	528	236	683
chr1_24557758_hg38	chr1	24554935	24560580	75	106	117	307	132	274	284	111	278	297	266	297	263	217	249	206	185	212	77	48	43	123	66	151	26	57	38	37	40	54	64	47	34	51	32	30	65	42	46	56	13	14	26	45	20	54
chr1_24567938_hg38	chr1	24566938	24568939	20	27	12	34	31	35	39	26	28	31	41	29	30	42	28	29	25	14	17	12	11	19	20	17	11	13	16	14	11	17	14	10	12	25	9	7	41	18	14	16	11	11	20	18	9	24
chr1_24576402_hg38	chr1	24575292	24577511	27	16	26	92	37	89	53	33	78	72	73	86	63	51	76	36	7	51	27	7	5	31	25	52	30	44	24	12	23	38	40	18	29	25	20	22	61	34	46	57	8	11	19	25	12	52
chr1_24589076_hg38	chr1	24588072	24590081	17	23	22	54	49	58	45	34	61	51	61	49	31	46	43	34	25	47	14	6	10	33	19	19	15	23	7	14	32	9	45	15	26	20	21	21	40	28	23	38	4	5	16	22	11	28
chr1_24641881_hg38	chr1	24638256	24645506	303	220	751	415	183	695	553	172	629	570	654	596	573	278	640	502	247	609	870	285	105	371	90	523	182	315	230	170	314	443	348	293	400	225	252	234	385	233	330	313	252	242	277	315	177	649
chr1_24726288_hg38	chr1	24723921	24728656	136	212	231	246	214	281	325	192	369	267	408	266	345	475	327	226	199	243	31	16	52	163	105	242	81	123	41	27	82	122	151	105	134	94	102	100	192	113	114	161	55	84	121	134	103	285
chr1_24730810_hg38	chr1	24729702	24731918	79	106	112	138	89	157	187	112	273	234	260	216	210	218	232	160	118	148	15	7	12	101	65	152	43	82	21	11	38	71	68	60	66	48	59	48	90	60	60	111	36	43	54	85	39	133
chr1_24736002_hg38	chr1	24734717	24737286	84	100	135	109	101	136	327	126	238	131	192	170	209	248	214	142	63	147	36	22	11	93	57	154	49	67	22	14	52	49	60	56	58	39	46	44	82	56	43	74	48	53	70	111	79	234
chr1_24745658_hg38	chr1	24742779	24748536	148	205	474	272	171	638	518	205	654	366	666	575	422	414	745	328	179	475	81	28	23	270	83	488	185	228	74	40	194	229	325	183	416	116	310	161	317	181	336	235	175	145	248	370	212	759
chr1_24803388_hg38	chr1	24801817	24804960	20	75	54	59	98	132	245	89	88	38	93	65	148	163	108	64	40	45	10	6	6	89	27	55	13	39	17	13	24	28	23	39	33	30	20	23	60	31	33	43	27	27	36	57	26	71
chr1_24893612_hg38	chr1	24892515	24894710	19	3	20	38	11	56	68	16	59	32	6	33	50	14	48	24	1	24	8	12	1	25	4	14	6	13	11	8	12	16	20	2	8	16	14	8	20	8	14	13	6	10	8	10	10	33
chr1_24912823_hg38	chr1	24910011	24915635	68	33	89	185	73	182	151	64	141	314	165	177	146	76	106	88	55	107	26	14	10	79	22	109	50	72	41	35	65	56	96	51	80	68	56	41	88	68	54	73	28	37	49	73	35	168
chr1_24930512_hg38	chr1	24927975	24933049	81	28	117	163	30	224	113	35	124	164	213	168	124	44	131	90	21	117	35	9	3	68	11	96	28	38	30	27	49	70	49	59	58	70	51	33	64	49	48	61	23	34	29	27	28	63
chr1_25018262_hg38	chr1	25017009	25019514	45	19	80	23	15	62	35	19	48	47	55	46	59	43	72	60	50	49	9	7	2	26	14	60	12	22	14	13	30	35	20	18	16	32	25	21	28	25	12	20	24	25	33	19	18	24
chr1_25023378_hg38	chr1	25020180	25026575	177	131	305	142	57	237	219	94	225	200	206	182	247	149	243	231	110	224	44	21	7	168	50	249	45	89	66	46	117	159	97	102	124	154	78	58	115	82	60	59	75	71	89	58	35	67
chr1_25098572_hg38	chr1	25097309	25099836	16	35	24	40	23	53	53	42	30	47	99	52	35	69	32	29	62	33	21	10	5	27	27	24	8	20	21	22	14	7	23	22	14	34	14	12	23	13	13	19	13	10	19	21	9	27
chr1_25174684_hg38	chr1	25173059	25176309	39	44	65	147	98	139	110	86	126	94	141	154	116	110	136	83	32	117	18	7	6	31	26	88	8	11	12	13	16	8	9	11	13	19	10	9	8	12	7	10	9	5	17	10	11	23
chr1_25198546_hg38	chr1	25196520	25200572	88	86	125	215	129	283	162	102	218	203	235	288	134	149	187	114	129	173	31	32	15	76	60	160	56	80	40	27	82	77	141	67	91	46	89	58	115	62	120	117	37	61	74	87	100	225
chr1_25247328_hg38	chr1	25245225	25249432	188	129	542	305	70	393	373	105	466	404	498	412	391	167	471	339	85	394	814	263	85	276	37	377	108	140	129	86	184	208	224	133	233	108	171	120	171	122	157	146	237	186	267	363	216	612
chr1_25425345_hg38	chr1	25424350	25426340	13	29	29	8	10	18	10	21	16	8	11	9	14	30	18	7	6	16	17	29	26	9	10	13	19	24	28	31	39	32	37	17	29	16	22	15	27	11	21	14	28	17	22	16	12	28
chr1_25432767_hg38	chr1	25428727	25436807	202	308	674	272	196	493	626	220	558	410	551	467	409	284	494	406	150	495	1144	455	187	381	65	461	135	185	183	142	227	253	200	162	215	134	210	132	250	173	198	174	265	176	289	490	227	684
chr1_25485515_hg38	chr1	25482932	25488098	54	150	163	59	76	127	186	106	119	95	126	104	78	150	115	79	38	131	374	305	172	90	50	119	64	108	145	157	126	101	93	56	64	91	65	44	138	67	69	116	85	70	110	112	50	137
chr1_25494577_hg38	chr1	25493577	25495577	22	27	47	22	23	27	40	22	25	10	44	17	16	29	25	29	27	38	156	97	48	38	22	36	11	27	38	37	33	38	20	22	24	43	18	13	30	20	16	20	31	32	54	44	23	77
chr1_25501624_hg38	chr1	25500637	25502610	16	25	44	26	22	37	42	38	42	25	28	38	48	49	36	53	6	43	128	73	57	31	14	40	24	30	60	49	26	36	29	24	24	31	14	16	34	23	10	19	37	22	40	45	21	60
chr1_25581653_hg38	chr1	25580460	25582846	30	30	48	113	50	99	69	33	67	119	87	62	74	70	98	69	44	55	136	128	52	48	17	61	44	32	95	38	42	45	81	37	75	29	48	26	78	37	75	73	21	21	56	72	45	146
chr1_25618680_hg38	chr1	25614296	25623063	308	529	1364	406	227	710	593	280	841	540	758	769	505	371	756	559	308	867	1365	737	380	610	132	867	200	225	464	270	476	459	339	238	373	236	247	167	354	257	303	304	420	276	360	280	173	536
chr1_25676292_hg38	chr1	25675292	25677293	21	56	75	33	25	35	59	28	25	19	34	39	19	30	26	50	21	45	96	53	35	48	19	51	35	35	60	68	58	46	50	30	46	43	41	21	64	54	51	75	48	59	62	46	48	127
chr1_25686637_hg38	chr1	25682612	25690662	290	514	949	134	117	220	249	201	219	230	231	240	236	239	203	267	227	379	1053	1037	392	355	149	358	137	186	470	441	424	332	295	170	266	191	161	121	279	173	220	298	202	186	238	136	111	355
chr1_25695027_hg38	chr1	25693328	25696726	114	203	435	64	73	148	193	131	141	112	166	182	134	128	193	147	74	215	180	139	97	203	61	243	47	79	88	90	150	117	120	85	110	84	65	51	77	58	75	96	150	99	144	67	55	152
chr1_25699606_hg38	chr1	25697044	25702167	261	392	543	244	187	292	486	228	333	259	321	329	340	369	343	268	219	331	402	358	201	302	107	387	128	159	139	127	256	244	207	116	219	129	161	122	211	129	171	230	171	123	175	151	100	336
chr1_25704232_hg38	chr1	25703169	25705295	78	78	138	60	45	61	85	56	84	60	105	74	64	58	87	71	88	126	110	49	45	91	49	114	31	39	47	31	74	75	65	45	54	46	33	28	67	44	43	53	96	67	65	31	26	62
chr1_25727126_hg38	chr1	25724841	25729412	125	139	284	168	114	238	149	133	216	225	188	214	157	152	147	160	127	186	455	301	184	121	86	203	69	104	173	165	142	106	165	73	117	108	67	71	172	72	117	165	121	107	145	85	54	199
chr1_25756178_hg38	chr1	25753324	25759033	204	257	467	119	71	160	77	112	100	135	150	179	112	121	108	182	164	271	654	587	300	200	68	297	115	160	159	171	290	258	210	145	223	179	102	102	210	146	144	169	276	218	270	169	103	351
chr1_25775365_hg38	chr1	25774195	25776535	52	50	130	49	19	50	80	45	46	37	47	49	57	59	58	62	30	65	364	259	64	50	32	73	25	50	55	66	82	68	62	44	37	35	27	33	57	40	36	60	20	19	24	18	15	34
chr1_25807888_hg38	chr1	25803666	25812110	373	362	1329	229	78	386	386	183	544	420	472	434	364	288	645	416	189	734	1282	967	357	418	136	775	149	226	404	316	538	532	349	282	347	308	191	150	336	226	211	257	398	298	475	347	202	644
chr1_25826399_hg38	chr1	25825358	25827440	38	44	66	55	57	90	71	26	70	45	66	64	51	39	71	44	26	52	29	30	22	33	11	71	10	35	20	24	21	27	39	21	27	33	14	20	32	19	15	31	16	25	55	47	23	96
chr1_25859439_hg38	chr1	25858167	25860711	63	46	157	91	46	85	117	35	80	130	98	99	121	52	79	85	47	87	92	50	33	82	12	98	31	40	24	27	55	53	71	43	32	43	42	32	54	56	26	50	42	25	50	40	27	58
chr1_25875622_hg38	chr1	25873833	25877411	276	147	659	334	76	365	397	122	337	485	420	407	431	170	410	360	135	371	883	246	93	282	67	415	40	60	46	45	74	86	58	62	57	87	64	45	78	63	49	49	115	91	97	114	75	194
chr1_25902206_hg38	chr1	25894146	25910265	522	1475	1885	690	873	1771	1618	754	1914	754	1742	1786	1001	1237	1671	893	790	1506	1270	572	416	935	353	1469	546	465	388	280	863	702	988	408	1169	331	642	425	811	463	883	762	849	674	1017	1405	779	2381
chr1_25922644_hg38	chr1	25920509	25924780	179	302	593	205	104	228	288	124	354	273	335	258	268	211	377	242	142	325	958	693	238	247	72	351	80	133	228	276	257	272	162	136	198	131	150	99	163	126	120	136	364	238	254	143	99	265
chr1_25927056_hg38	chr1	25924953	25929158	183	356	495	166	145	193	206	117	196	210	244	236	181	232	206	186	188	290	472	310	203	188	76	312	76	107	177	190	261	199	186	90	192	77	98	92	151	93	131	118	273	187	279	167	116	361
chr1_25933746_hg38	chr1	25932710	25934783	68	203	336	23	29	32	136	55	80	35	84	64	73	92	89	79	59	139	78	40	66	90	44	161	30	46	29	28	134	109	64	58	82	48	46	36	44	31	32	37	192	87	134	33	34	80
chr1_25969254_hg38	chr1	25968078	25970431	64	145	175	16	24	37	54	35	49	18	35	37	25	31	32	65	76	77	25	18	11	82	41	116	9	24	21	20	66	56	28	20	44	28	16	14	25	35	16	33	111	66	75	30	17	53
chr1_25998281_hg38	chr1	25996028	26000534	230	314	448	249	150	334	398	157	385	259	398	368	320	316	411	317	220	394	628	324	217	266	116	344	120	130	124	120	188	194	169	111	173	110	118	102	143	101	134	137	161	139	207	211	130	421
chr1_26017288_hg38	chr1	26015936	26018639	119	124	294	39	22	52	115	81	107	39	88	77	103	67	155	92	33	138	58	56	29	115	49	183	29	47	45	57	112	128	51	60	75	70	40	21	38	31	23	31	159	131	155	77	56	139
chr1_26028896_hg38	chr1	26027286	26030506	94	115	295	79	43	75	66	65	95	92	93	78	62	74	93	104	54	162	45	30	19	114	33	189	18	27	87	31	129	96	69	47	53	59	36	36	51	56	37	70	243	139	246	339	178	538
chr1_26067291_hg38	chr1	26066213	26068369	15	22	30	15	27	26	24	16	31	16	38	26	22	58	68	13	21	23	16	3	4	13	10	9	41	79	17	14	43	71	55	43	59	41	75	77	91	44	36	63	23	26	29	31	14	32
chr1_26111383_hg38	chr1	26108862	26113904	179	119	672	314	96	555	443	124	539	403	592	483	373	139	567	402	154	503	830	192	86	315	58	502	135	179	210	135	242	303	283	170	375	164	244	180	206	178	246	201	199	146	191	219	117	370
chr1_26127868_hg38	chr1	26126652	26129084	34	87	67	49	91	144	182	106	133	46	99	98	60	107	135	50	58	75	20	21	11	54	44	87	34	40	21	15	40	29	57	32	32	26	47	36	51	32	27	36	25	16	20	23	12	19
chr1_26165008_hg38	chr1	26158216	26171800	465	313	1027	455	194	757	647	265	913	841	823	804	681	443	940	652	244	854	1012	413	286	579	129	902	226	306	291	229	435	428	448	333	431	346	326	244	401	282	302	316	343	272	382	369	223	548
chr1_26237248_hg38	chr1	26232812	26241684	199	360	505	309	358	509	696	278	639	403	620	603	504	604	558	399	166	535	405	171	115	297	118	433	186	164	116	91	209	192	292	129	296	103	231	126	288	135	284	224	372	371	487	947	487	1419
chr1_26283108_hg38	chr1	26273982	26292233	804	867	2867	782	429	1132	1092	606	1383	1128	1494	1209	1133	896	1490	1113	505	1443	752	436	169	879	278	1391	462	587	367	285	764	751	917	506	897	532	577	401	879	573	668	729	624	556	986	1222	622	2223
chr1_26306500_hg38	chr1	26305321	26307678	60	51	143	82	50	106	135	27	88	112	107	98	102	76	93	85	37	86	173	35	20	84	20	74	29	60	22	27	57	58	60	32	46	48	38	22	60	37	38	45	37	38	39	57	33	86
chr1_26321264_hg38	chr1	26319829	26322699	60	55	116	82	30	122	102	53	124	98	94	104	128	67	131	94	27	140	32	29	16	76	22	116	53	45	32	20	74	68	107	34	87	52	70	49	87	47	94	100	29	39	86	92	70	196
chr1_26336530_hg38	chr1	26335225	26337835	37	18	49	62	13	76	69	17	63	80	43	36	56	25	52	35	6	47	88	35	20	31	6	47	28	47	25	29	39	50	44	34	47	44	38	33	50	40	42	43	19	21	32	34	14	77
chr1_26361266_hg38	chr1	26359130	26363401	24	6	39	63	19	63	36	9	21	67	45	36	24	19	40	35	24	31	73	65	43	21	9	27	25	47	53	38	50	51	64	36	45	46	36	42	64	57	33	53	20	20	37	58	16	85
chr1_26435036_hg38	chr1	26430681	26439390	101	96	259	147	75	262	261	97	232	148	181	211	162	119	214	149	62	205	893	406	329	140	41	165	61	76	211	202	106	97	104	81	90	97	83	68	100	83	58	95	119	85	153	176	75	244
chr1_26500940_hg38	chr1	26499597	26502283	179	66	323	266	48	390	283	66	429	321	429	379	339	103	433	288	41	331	351	72	14	227	15	333	80	131	79	49	108	176	139	132	168	98	133	126	156	108	142	144	91	97	140	189	114	387
chr1_26556137_hg38	chr1	26552473	26559801	322	424	659	879	467	1028	1099	308	1491	1196	1275	1238	1078	949	1487	768	390	854	231	201	63	332	170	760	305	340	165	123	281	329	415	256	603	173	353	274	540	272	425	483	279	289	572	1009	496	1963
chr1_26620385_hg38	chr1	26617808	26622962	138	217	690	187	170	555	491	182	717	233	757	669	328	275	829	299	145	578	488	300	99	397	71	595	135	194	207	151	173	244	246	160	383	147	234	144	238	172	245	174	256	178	273	379	180	603
chr1_26696014_hg38	chr1	26691265	26700763	302	567	1793	455	407	1636	989	424	1931	726	2058	1634	763	620	1925	883	389	1476	1421	696	209	815	193	1458	466	604	701	394	714	832	916	614	1312	437	765	572	814	609	940	668	468	404	553	897	500	1555
chr1_26746648_hg38	chr1	26742224	26751072	170	269	451	169	197	347	502	312	350	244	417	367	237	281	431	324	226	370	982	591	441	381	110	377	106	202	368	223	217	212	217	162	204	186	118	100	239	183	124	184	174	161	187	199	111	332
chr1_26774590_hg38	chr1	26773381	26775800	48	32	87	52	24	73	71	40	67	56	77	61	42	46	51	61	52	61	200	218	85	56	15	59	22	55	67	64	34	37	40	39	48	38	30	30	57	37	25	47	37	41	45	51	36	90
chr1_26780100_hg38	chr1	26778660	26781540	52	60	121	85	60	126	153	70	125	152	167	164	112	103	129	106	28	124	191	190	68	94	33	117	59	90	79	59	86	54	80	78	74	52	65	64	129	79	83	125	63	54	99	165	66	230
chr1_26799728_hg38	chr1	26798256	26801201	45	72	169	39	64	147	227	82	156	74	165	140	109	100	155	117	108	160	227	63	48	109	37	158	39	69	64	31	66	62	75	52	64	61	76	57	85	77	49	75	60	75	112	77	44	170
chr1_26856481_hg38	chr1	26853927	26859035	151	140	362	63	32	132	115	68	137	72	99	89	73	90	136	151	79	206	689	613	227	158	47	246	26	76	166	94	109	151	103	72	97	122	74	75	98	69	68	66	124	79	96	87	52	173
chr1_26894528_hg38	chr1	26893528	26895529	40	32	102	16	19	78	47	29	53	34	53	37	41	31	37	35	60	58	23	9	6	34	20	56	22	26	27	10	43	59	58	33	54	33	24	23	27	27	40	35	27	22	29	25	8	53
chr1_26900414_hg38	chr1	26898891	26901938	125	115	274	121	68	242	236	103	139	196	224	168	145	157	165	159	122	163	482	142	77	167	39	147	55	122	77	65	103	143	122	93	105	89	92	64	95	62	82	108	154	126	150	169	114	320
chr1_26914163_hg38	chr1	26911729	26916597	55	50	101	43	26	115	26	22	51	39	46	38	35	31	39	40	21	55	614	321	111	50	15	63	22	57	176	122	69	83	48	39	54	46	37	29	33	39	31	48	27	22	52	33	15	56
chr1_26950199_hg38	chr1	26948983	26951415	106	105	130	30	21	40	40	22	39	51	33	43	32	34	28	59	20	54	173	88	42	58	28	62	11	25	65	47	81	62	40	34	35	58	27	17	30	28	13	27	37	22	28	28	20	53
chr1_26960608_hg38	chr1	26958973	26962244	110	98	157	54	9	58	50	11	23	61	37	36	45	10	30	70	57	79	201	78	43	94	16	82	15	28	49	42	82	89	48	26	34	46	17	18	48	22	26	28	36	30	50	38	11	58
chr1_26995638_hg38	chr1	26992190	26999085	230	132	552	197	52	276	177	96	248	257	247	238	286	135	231	270	74	309	988	226	160	266	51	290	51	94	161	150	174	197	115	93	91	122	87	49	103	80	75	128	142	106	143	79	42	116
chr1_27002002_hg38	chr1	27000828	27003175	39	44	66	49	29	56	62	63	62	87	84	74	64	71	67	81	81	62	54	42	26	74	24	58	21	45	24	34	34	45	50	37	34	34	30	28	46	30	34	56	29	21	38	30	17	53
chr1_27005226_hg38	chr1	27003527	27006925	76	47	118	44	11	64	49	47	39	69	80	78	51	54	51	79	37	85	162	124	36	77	26	91	17	36	92	87	67	48	32	53	39	38	32	23	55	24	23	28	30	46	67	48	19	64
chr1_27012049_hg38	chr1	27009527	27014571	102	78	158	123	38	118	114	68	110	120	145	160	125	83	114	127	54	135	294	250	135	102	28	153	58	95	67	47	80	68	100	60	69	72	61	46	125	73	78	91	44	72	113	90	46	172
chr1_27045296_hg38	chr1	27043915	27046677	78	86	178	50	30	104	57	39	84	48	91	76	62	67	95	63	20	103	53	37	55	95	16	121	28	42	41	39	94	65	58	30	40	47	52	26	36	34	29	53	56	66	69	42	24	64
chr1_27071023_hg38	chr1	27069617	27072429	131	123	204	39	13	30	35	19	26	58	51	42	49	21	27	89	76	121	279	151	85	89	28	158	23	28	127	148	130	132	50	48	44	63	26	9	40	34	12	24	78	85	74	28	21	30
chr1_27100081_hg38	chr1	27098939	27101223	99	73	355	40	11	72	69	35	127	70	104	76	112	62	131	111	41	185	89	77	22	111	18	171	14	30	29	13	66	48	33	35	28	28	20	14	19	19	15	12	88	76	117	34	25	76
chr1_27103122_hg38	chr1	27102005	27104238	88	70	264	60	16	104	81	29	142	73	73	73	74	36	144	73	21	142	171	86	40	93	14	154	14	29	21	16	60	73	29	22	27	35	14	17	21	15	18	27	65	61	74	35	28	67
chr1_27110582_hg38	chr1	27108680	27112484	140	156	290	56	52	90	85	97	133	146	131	122	96	113	179	160	72	171	570	355	230	95	44	198	35	48	76	32	127	122	66	74	66	80	66	29	71	38	32	35	62	51	80	38	25	91
chr1_27119514_hg38	chr1	27113068	27125961	665	1035	1895	322	290	603	552	416	900	455	582	712	573	668	1008	645	386	1094	2176	1585	1092	688	252	1160	146	226	324	239	804	652	351	304	384	353	244	190	380	196	190	206	567	409	609	395	245	695
chr1_27138254_hg38	chr1	27135073	27141435	265	417	818	140	122	269	284	200	438	196	268	270	253	337	482	322	249	485	1163	955	536	253	111	509	96	135	141	120	380	330	208	164	171	197	137	87	175	137	115	133	407	257	340	146	84	243
chr1_27145910_hg38	chr1	27144448	27147373	129	173	380	37	28	75	102	84	137	62	71	64	77	111	131	112	56	167	162	127	121	155	39	192	30	39	41	25	138	105	63	59	56	61	56	34	53	47	18	27	132	65	113	39	24	91
chr1_27152233_hg38	chr1	27147942	27156524	409	691	1313	291	235	522	447	346	811	437	581	602	442	520	905	493	391	780	863	605	414	546	167	757	191	320	274	160	558	496	320	257	300	271	256	183	333	233	226	254	478	342	495	380	240	691
chr1_27235117_hg38	chr1	27232795	27237439	175	99	366	251	85	309	360	99	334	319	358	306	323	156	350	291	116	254	505	112	59	227	43	275	81	80	61	49	108	99	111	57	104	67	88	62	96	64	87	78	106	90	137	180	87	270
chr1_27302449_hg38	chr1	27296396	27308502	362	377	985	264	105	493	399	231	492	510	573	583	355	242	485	528	236	704	3236	1940	834	483	138	663	147	257	927	1052	444	515	338	264	344	311	201	168	392	241	221	333	491	339	454	347	198	508
chr1_27320586_hg38	chr1	27317202	27323970	169	205	415	195	131	262	311	118	280	258	254	283	238	180	290	274	147	305	1486	680	432	249	91	307	95	128	254	338	178	207	165	107	142	148	123	123	177	130	141	195	211	178	218	203	108	347
chr1_27327780_hg38	chr1	27325888	27329671	94	122	165	82	58	106	233	96	132	86	149	113	128	154	144	149	94	131	172	89	101	117	51	106	55	128	67	43	106	150	112	86	91	89	72	103	163	98	78	148	86	62	90	54	29	92
chr1_27330934_hg38	chr1	27329908	27331959	38	40	52	33	19	38	22	30	35	54	43	25	53	32	33	47	18	53	83	97	36	29	15	41	20	52	38	21	35	81	45	49	29	49	22	55	70	45	26	63	27	25	33	26	18	37
chr1_27342702_hg38	chr1	27341305	27344099	82	48	157	45	9	53	58	27	45	88	94	51	49	42	56	61	14	69	1064	678	140	44	31	75	25	50	35	52	60	84	64	37	51	60	24	35	71	51	38	44	77	51	79	38	25	57
chr1_27392960_hg38	chr1	27389914	27396006	278	221	896	220	73	348	256	104	322	324	250	340	235	133	401	291	171	422	1101	842	307	277	79	388	69	146	291	264	232	251	176	138	148	163	111	91	158	136	101	137	252	189	285	191	82	311
chr1_27404856_hg38	chr1	27401483	27408228	227	185	376	373	252	545	432	278	446	500	615	492	433	339	476	460	167	389	181	204	87	346	83	457	156	267	143	116	215	256	277	209	275	221	141	160	420	283	210	333	267	252	403	636	339	1135
chr1_27417716_hg38	chr1	27415221	27420210	116	247	287	140	233	331	504	257	347	137	361	340	239	252	378	234	178	300	58	54	33	278	124	280	105	134	58	36	116	133	155	87	171	103	107	78	200	133	128	180	165	169	235	411	234	674
chr1_27429435_hg38	chr1	27426088	27432782	170	441	578	165	355	437	685	415	575	245	727	549	351	362	612	413	323	536	187	125	123	559	217	565	134	237	107	78	252	279	254	209	269	186	176	156	320	227	166	240	273	252	309	356	190	582
chr1_27436198_hg38	chr1	27435186	27437209	46	78	79	51	65	96	162	77	94	75	156	115	89	101	107	77	86	98	24	10	16	114	36	91	26	46	21	14	47	50	51	38	59	51	37	29	57	38	40	42	48	54	62	83	38	110
chr1_27514156_hg38	chr1	27513159	27515152	47	50	80	77	50	96	122	57	113	124	132	124	98	102	108	67	45	93	26	21	23	47	27	82	50	46	12	11	39	51	54	52	59	39	46	60	70	36	37	60	35	37	59	77	50	158
chr1_27523888_hg38	chr1	27518006	27529769	742	857	2371	955	466	1134	1275	671	2017	1469	1932	1763	1383	1180	2113	1310	727	2013	3510	3229	1097	1050	382	2022	403	607	1127	1313	892	1005	756	580	826	524	603	407	758	400	461	565	980	796	1084	1466	694	2029
chr1_27536668_hg38	chr1	27534871	27538466	205	285	644	252	143	261	298	156	365	316	383	420	281	290	371	297	241	408	779	669	240	272	71	469	110	149	294	271	277	241	207	150	188	162	118	94	212	109	129	157	295	230	321	305	153	510
chr1_27568468_hg38	chr1	27559175	27577761	1008	1097	3178	865	379	1328	1279	708	1864	1454	1735	1885	1293	1183	2009	1600	719	2066	4711	3698	1537	1448	479	2353	366	764	1386	1207	1276	1300	846	757	812	869	623	466	887	654	456	648	1210	903	1350	1296	657	2049
chr1_27589224_hg38	chr1	27587186	27591261	194	126	300	155	92	247	245	153	286	247	246	265	225	221	247	227	60	266	390	400	235	184	77	283	66	142	168	149	166	179	155	137	133	149	122	92	193	112	114	127	169	159	186	271	115	399
chr1_27598500_hg38	chr1	27592062	27604937	742	523	2585	720	234	1285	888	423	1758	1081	1289	1466	1002	615	1991	1158	335	1679	2200	1197	677	994	244	1597	305	536	829	564	868	884	642	578	615	632	532	325	666	465	400	401	623	505	726	761	370	1252
chr1_27671376_hg38	chr1	27668068	27674685	213	399	513	184	182	398	456	251	427	203	432	378	301	336	388	312	231	444	747	334	258	363	126	457	112	172	207	194	207	251	180	136	216	171	125	98	209	138	141	197	399	318	346	300	174	517
chr1_27755410_hg38	chr1	27753822	27756998	60	112	81	41	56	72	170	79	97	70	111	89	89	104	87	80	59	95	130	51	45	86	33	101	36	49	54	28	57	55	59	34	49	32	40	34	52	65	44	47	48	66	100	171	109	288
chr1_27773514_hg38	chr1	27771539	27775490	95	141	347	166	64	248	414	99	328	309	335	275	274	155	317	224	67	285	477	167	83	243	45	214	86	101	110	63	126	150	138	108	180	90	118	98	127	110	122	115	187	143	230	251	145	345
chr1_27830849_hg38	chr1	27829058	27832640	128	101	330	227	49	251	267	93	286	281	299	242	238	102	321	211	69	229	384	142	55	160	35	239	76	94	82	61	125	123	142	95	144	82	112	78	128	111	105	115	148	116	139	206	92	338
chr1_27858006_hg38	chr1	27855735	27860276	91	74	108	148	48	153	162	104	160	165	146	179	151	145	170	101	88	136	44	48	23	65	38	141	72	85	79	74	127	104	130	72	90	98	80	82	110	64	96	115	51	56	66	61	35	156
chr1_27862754_hg38	chr1	27861521	27863987	40	52	85	79	49	128	94	66	91	78	213	108	95	88	128	80	64	88	39	10	4	54	43	91	25	64	25	23	43	43	54	35	41	46	30	33	63	39	40	35	20	24	26	31	21	60
chr1_27891897_hg38	chr1	27889965	27893829	46	145	102	78	140	163	246	134	124	55	229	137	76	121	110	96	77	110	53	20	13	125	58	115	59	67	32	15	52	60	90	65	101	40	52	52	119	76	86	121	31	27	61	65	28	138
chr1_27961462_hg38	chr1	27958322	27964601	319	194	639	562	185	587	592	153	561	706	602	508	601	325	543	527	208	472	982	332	93	351	62	461	196	276	336	272	259	353	362	236	353	198	298	248	434	290	295	346	187	217	283	499	270	740
chr1_27967034_hg38	chr1	27964834	27969233	168	164	251	138	110	226	167	97	192	247	196	239	145	131	202	196	97	180	121	120	52	108	43	175	74	118	112	86	144	128	161	107	144	116	94	73	225	137	121	147	110	104	123	129	47	165
chr1_27980330_hg38	chr1	27978445	27982214	41	106	129	44	74	116	236	110	134	69	126	112	105	97	144	87	77	148	78	112	64	132	33	156	71	71	90	41	103	90	91	67	92	47	79	60	104	69	78	90	149	115	139	192	106	324
chr1_28021274_hg38	chr1	28020268	28022281	7	30	24	14	25	22	35	18	13	19	28	15	13	22	18	12	18	17	8	7	9	12	7	13	11	13	9	13	19	25	11	26	12	24	6	19	19	23	10	23	12	8	13	20	13	28
chr1_28088262_hg38	chr1	28087006	28089519	119	115	227	123	57	240	196	67	227	174	258	202	188	90	244	143	60	247	275	68	47	141	39	196	67	61	64	55	96	120	105	76	116	48	77	54	108	69	97	91	81	66	99	165	92	259
chr1_28090942_hg38	chr1	28089829	28092055	26	65	66	43	50	102	79	36	95	46	85	99	58	77	107	46	27	75	11	8	11	42	18	62	37	22	15	15	25	45	62	19	49	15	28	20	47	28	48	54	17	17	29	46	19	75
chr1_28106240_hg38	chr1	28103272	28109207	116	305	229	224	312	392	630	241	520	234	457	408	352	450	517	262	407	338	59	25	41	205	113	289	162	133	67	45	168	142	265	121	307	85	150	130	226	140	225	266	96	136	209	452	257	670
chr1_28174691_hg38	chr1	28171311	28178071	222	255	399	379	241	611	476	286	715	385	755	657	494	523	679	367	311	466	61	46	32	267	158	448	245	267	93	57	245	309	365	188	414	164	269	208	359	234	341	397	141	152	289	425	223	867
chr1_28259975_hg38	chr1	28257918	28262032	188	80	397	190	47	256	325	63	256	332	275	275	279	64	275	248	52	257	459	70	36	180	29	226	49	48	33	34	83	84	78	53	67	70	62	30	70	42	44	47	64	51	69	76	40	140
chr1_28329022_hg38	chr1	28327401	28330644	125	122	195	159	85	173	154	89	136	182	196	148	190	116	158	181	45	130	249	106	44	153	30	137	44	60	66	42	84	81	65	55	72	51	62	43	69	54	65	69	103	65	104	104	62	163
chr1_28437838_hg38	chr1	28436440	28439237	27	51	62	25	51	70	122	65	46	49	83	64	52	54	70	39	30	45	22	22	14	62	19	64	25	54	19	24	37	27	45	30	30	37	24	27	45	44	27	47	39	39	31	44	33	41
chr1_28501984_hg38	chr1	28500886	28503082	51	45	80	17	28	48	51	31	40	18	47	37	30	33	38	36	47	40	34	8	24	30	16	50	17	28	23	31	35	49	33	25	30	34	21	21	43	30	27	59	19	23	29	59	40	93
chr1_28507792_hg38	chr1	28504539	28511046	214	237	559	236	123	310	386	144	332	319	380	301	372	243	347	320	83	358	483	171	99	327	69	343	81	124	108	86	178	196	141	135	138	134	138	79	148	115	105	162	210	154	197	256	128	344
chr1_28518207_hg38	chr1	28516871	28519543	69	46	174	122	38	181	171	51	148	160	153	125	160	68	123	131	28	146	202	59	40	100	33	124	39	54	46	36	58	64	70	39	61	49	73	38	67	42	65	62	83	53	83	87	52	147
chr1_28538246_hg38	chr1	28536810	28539682	35	28	65	93	108	176	77	64	123	65	122	105	68	98	85	44	65	77	13	12	7	28	26	56	56	62	30	36	66	47	114	39	86	49	57	48	101	60	77	109	11	13	17	18	10	39
chr1_28592349_hg38	chr1	28590801	28593897	62	40	81	87	27	115	96	43	95	136	126	91	110	59	90	80	11	75	42	24	23	57	23	92	33	55	30	18	47	57	61	33	50	38	40	38	65	48	38	47	42	31	39	35	29	71
chr1_28602998_hg38	chr1	28601349	28604646	78	152	194	64	55	151	112	64	122	71	111	151	84	104	127	70	71	164	44	23	21	97	34	150	33	33	49	43	98	69	46	27	65	41	54	24	53	38	51	50	57	59	68	73	51	131
chr1_28737094_hg38	chr1	28735143	28739045	138	142	488	233	83	382	355	80	348	382	427	341	339	158	387	264	90	365	534	204	69	275	42	342	88	142	115	107	198	234	195	184	207	127	166	134	176	131	125	162	92	97	91	129	78	213
chr1_28756774_hg38	chr1	28755690	28757858	6	23	45	17	52	73	71	35	69	12	55	37	30	18	47	24	19	46	23	15	12	29	20	54	23	25	15	11	21	27	43	18	31	23	17	24	29	27	24	27	40	38	34	54	29	69
chr1_28775350_hg38	chr1	28774229	28776472	47	54	75	60	30	60	92	34	69	75	78	59	87	58	65	80	31	71	66	61	25	44	12	75	15	17	20	21	28	31	20	20	18	20	9	15	26	18	14	19	68	43	73	59	34	108
chr1_28815588_hg38	chr1	28811599	28819578	210	256	716	60	15	44	98	63	136	74	66	39	82	79	171	191	97	291	42	48	21	231	73	340	36	86	56	53	274	257	89	90	92	113	75	56	49	45	44	30	150	93	159	51	31	72
chr1_28825816_hg38	chr1	28824635	28826996	65	120	217	12	8	10	21	15	23	8	7	3	12	23	29	47	46	101	7	4	2	70	24	93	3	7	7	16	41	40	13	22	25	25	5	8	9	8	4	5	21	23	29	13	7	8
chr1_28830986_hg38	chr1	28829911	28832061	60	79	138	14	6	15	24	9	12	15	16	8	20	12	16	53	36	92	20	4	18	66	27	93	2	11	12	14	50	45	14	13	27	23	6	7	7	7	3	8	111	41	69	17	15	30
chr1_28855527_hg38	chr1	28854489	28856565	43	38	63	38	22	54	42	28	76	24	24	10	48	33	78	45	17	52	18	29	20	43	18	55	14	28	13	17	42	41	23	30	36	29	21	24	29	21	30	31	51	27	55	31	19	60
chr1_28869312_hg38	chr1	28868296	28870327	22	29	30	8	4	15	34	15	23	6	9	11	30	28	24	20	12	14	133	93	56	26	6	30	10	20	33	21	30	18	10	9	17	17	8	5	9	9	10	6	11	8	23	7	4	12
chr1_28885266_hg38	chr1	28881331	28889200	277	241	533	387	147	716	328	165	482	430	345	403	396	252	538	378	128	384	605	258	206	257	68	333	94	137	119	82	203	167	174	118	133	132	137	102	221	118	127	177	176	163	255	335	165	649
chr1_28908418_hg38	chr1	28907463	28909374	12	6	8	2	1	14	25	7	9	10	11	6	14	11	10	5	6	7	16	14	10	7	1	5	111	371	500	596	204	367	241	237	380	450	256	259	423	292	217	286	3	6	6	12	3	17
chr1_28918358_hg38	chr1	28913024	28923692	118	131	278	169	54	242	279	150	216	193	209	182	204	192	265	128	54	151	1342	671	309	119	39	159	66	95	303	261	164	118	95	72	93	69	112	61	86	75	60	64	191	140	181	277	101	346
chr1_28950974_hg38	chr1	28949292	28952656	9	16	14	11	5	14	27	27	12	15	11	9	22	21	13	6	9	9	318	209	108	11	9	12	2	12	67	62	14	11	5	9	10	9	5	8	8	9	12	5	10	12	13	8	12	29
chr1_28984519_hg38	chr1	28982544	28986494	16	19	24	6	8	19	46	29	20	19	23	9	23	33	16	11	23	15	398	219	161	15	10	22	5	9	134	104	13	6	10	7	16	11	11	5	12	15	6	12	15	9	21	25	17	32
chr1_29031320_hg38	chr1	29030269	29032372	6	2	12	9	5	14	16	17	5	8	9	16	13	17	17	8	2	6	49	94	40	3	7	3	6	9	19	13	8	7	8	8	7	8	7	1	3	5	10	7	14	11	6	14	6	15
chr1_29064159_hg38	chr1	29062226	29066092	23	144	93	19	37	43	129	125	71	22	24	20	40	57	101	15	44	35	36	18	16	36	16	44	13	27	16	22	51	36	34	22	20	19	45	15	31	21	15	29	69	34	39	21	8	34
chr1_29113642_hg38	chr1	29112446	29114837	24	24	44	9	10	20	45	49	88	13	21	21	15	55	103	16	7	22	30	8	8	20	10	21	8	31	17	24	42	22	24	9	17	21	33	16	14	14	6	13	17	11	17	25	17	24
chr1_29122686_hg38	chr1	29119180	29126193	213	108	722	182	20	196	300	55	372	304	255	212	308	82	490	240	18	232	237	35	17	221	17	234	58	176	92	54	262	247	115	141	109	153	174	150	153	126	95	91	254	138	164	158	78	250
chr1_29134206_hg38	chr1	29133101	29135312	44	29	64	87	24	95	47	14	57	76	50	34	87	30	78	34	10	42	20	15	5	28	19	41	8	21	12	11	28	19	19	13	12	13	14	15	32	14	14	23	24	20	43	84	47	126
chr1_29166590_hg38	chr1	29165590	29167590	21	22	50	21	21	55	54	40	35	20	35	39	48	38	41	24	23	42	33	18	9	39	12	38	27	43	22	11	38	44	36	27	33	35	20	30	48	38	27	53	25	33	35	36	26	63
chr1_29181852_hg38	chr1	29179911	29183794	144	126	609	179	53	453	344	96	453	266	512	400	293	156	525	266	103	425	666	219	104	294	44	397	101	148	135	104	161	261	181	159	274	150	183	130	168	146	173	157	134	139	169	198	95	347
chr1_29202702_hg38	chr1	29201242	29204162	44	79	136	62	43	163	135	90	113	48	108	106	86	47	147	78	50	111	92	42	24	90	44	108	31	41	52	42	62	67	69	51	61	51	46	44	78	40	57	58	51	39	60	59	37	83
chr1_29216454_hg38	chr1	29215438	29217470	37	86	148	14	7	18	34	29	51	8	20	10	27	36	62	41	14	44	11	7	5	38	12	48	9	12	10	15	35	34	14	9	13	16	11	10	19	11	7	11	16	17	17	16	9	26
chr1_29260008_hg38	chr1	29258532	29261484	64	39	98	180	23	235	47	13	39	127	120	74	53	28	49	86	12	86	94	43	17	71	11	83	41	58	46	31	77	59	98	38	85	69	60	39	80	40	75	71	47	31	36	56	28	76
chr1_29268530_hg38	chr1	29266836	29270223	14	65	56	74	161	164	76	66	55	48	116	87	29	67	57	46	38	71	31	14	14	32	38	56	45	44	28	15	50	31	82	19	54	37	40	23	44	35	65	53	28	21	67	72	61	158
chr1_29271747_hg38	chr1	29270407	29273087	30	59	48	75	77	106	50	48	44	39	96	73	30	67	31	44	23	57	19	11	3	41	44	56	31	22	21	17	30	28	79	18	37	29	25	15	25	23	51	41	20	27	30	27	19	99
chr1_29331514_hg38	chr1	29329190	29333838	140	198	339	40	35	49	34	25	21	26	32	28	32	17	19	91	42	153	38	17	7	118	71	187	28	32	29	35	120	103	69	51	69	61	24	21	26	22	37	32	60	39	54	18	10	27
chr1_29343189_hg38	chr1	29342116	29344262	22	71	85	16	14	30	17	4	14	10	18	18	17	6	15	37	19	82	27	6	18	32	26	66	6	13	18	18	56	21	28	8	22	32	19	9	20	14	15	16	34	19	21	18	3	24
chr1_29351555_hg38	chr1	29350555	29352555	34	66	59	6	4	19	10	12	7	3	10	7	22	10	7	37	25	43	11	2	8	22	9	54	4	13	11	13	55	35	10	7	22	17	5	6	4	8	2	7	12	7	20	7	6	23
chr1_29417264_hg38	chr1	29415245	29419282	89	113	198	21	9	24	34	8	26	43	32	18	22	24	24	57	38	65	19	20	17	83	24	85	4	23	39	22	68	40	36	19	31	31	16	9	28	11	10	7	30	11	40	17	19	26
chr1_29469131_hg38	chr1	29466145	29472117	93	105	184	35	18	38	51	18	26	42	40	44	36	33	31	36	24	45	167	150	103	33	14	32	19	42	56	31	101	30	35	30	38	36	15	17	41	25	21	25	16	11	21	23	12	27
chr1_29520416_hg38	chr1	29518284	29522548	63	68	160	31	11	55	38	15	21	51	34	39	30	28	18	42	58	34	24	26	16	54	35	52	17	41	44	27	111	44	29	17	35	42	23	24	21	27	15	27	4	6	9	5	3	8
chr1_29651578_hg38	chr1	29649662	29653495	89	80	206	11	12	25	85	25	36	47	40	39	68	45	35	55	29	32	30	17	7	36	22	26	12	29	24	27	69	32	12	18	25	32	24	14	22	24	3	17	13	24	23	18	5	27
chr1_29683174_hg38	chr1	29681699	29684649	45	47	144	26	15	43	50	19	31	23	36	34	38	35	34	42	20	61	24	18	10	30	8	41	15	30	21	23	44	31	31	20	27	34	31	18	21	23	14	25	7	10	20	14	13	36
chr1_29687870_hg38	chr1	29685616	29690125	52	51	110	18	10	36	110	92	156	22	23	30	95	104	174	58	27	61	24	6	7	44	26	62	17	45	29	28	33	32	22	30	26	40	69	27	17	18	8	18	6	16	34	16	14	23
chr1_29744394_hg38	chr1	29743394	29745394	7	5	12	17	14	37	20	13	25	24	15	23	18	16	24	10	7	20	15	6	7	9	3	17	5	10	18	17	10	14	35	16	18	22	16	22	15	16	13	22	3	11	7	5	2	25
chr1_29749220_hg38	chr1	29747828	29750613	27	70	38	51	84	84	89	53	104	52	105	102	43	65	98	41	56	75	22	4	1	27	21	60	31	29	11	15	23	31	41	18	42	20	37	34	24	26	39	29	8	4	10	13	8	20
chr1_29755210_hg38	chr1	29752880	29757539	47	75	98	146	90	168	110	48	227	122	137	170	94	88	180	67	36	124	30	20	10	51	29	114	41	36	30	27	51	45	72	30	60	44	46	36	53	40	43	59	5	18	22	19	11	23
chr1_29954626_hg38	chr1	29953110	29956141	14	48	47	9	5	19	31	10	21	8	12	9	12	19	33	40	22	127	18	6	2	48	31	129	10	18	25	21	17	14	22	16	29	24	12	7	8	17	7	11	28	49	28	16	8	12
chr1_29968668_hg38	chr1	29965028	29972308	114	226	307	34	21	47	54	24	45	18	49	27	35	36	48	103	82	230	37	13	7	146	57	250	14	41	77	62	105	93	61	50	96	77	24	23	33	22	10	22	107	88	101	49	28	40
chr1_30008270_hg38	chr1	30007266	30009275	29	26	63	12	3	17	14	9	9	8	13	7	12	8	7	20	1	22	12	4	2	16	4	30	7	8	34	13	18	20	14	12	7	15	13	5	15	14	6	8	6	6	9	7	1	7
chr1_30010282_hg38	chr1	30009283	30011281	24	10	40	21	2	9	11	6	17	14	14	17	17	11	12	17	8	20	21	6	3	18	13	30	7	23	39	23	19	21	14	4	12	18	10	9	19	17	9	6	2	3	12	12	3	8
chr1_30014250_hg38	chr1	30013250	30015250	8	15	13	8	3	15	11	6	8	13	5	7	6	7	10	14	3	11	18	7	9	14	4	12	6	9	85	22	14	11	11	11	10	22	5	12	12	6	9	9	4	5	13	11	4	14
chr1_30034576_hg38	chr1	30033528	30035623	21	7	39	44	7	35	46	17	48	28	21	21	52	20	28	54	17	51	9	3	2	24	12	45	8	30	24	27	21	30	19	14	18	30	21	14	16	18	14	22	15	9	19	9	4	16
chr1_30085052_hg38	chr1	30082715	30087389	157	175	335	63	14	71	83	58	70	86	100	69	67	38	68	149	75	199	51	21	26	164	68	228	24	30	88	44	144	84	63	57	42	87	32	26	52	36	36	44	85	105	127	27	25	51
chr1_30125999_hg38	chr1	30123586	30128412	160	173	284	16	10	38	52	27	39	30	24	24	38	33	51	117	82	169	29	15	13	113	48	174	9	23	25	30	86	81	37	37	58	41	17	15	20	15	15	15	32	40	65	41	15	33
chr1_30322047_hg38	chr1	30318600	30325494	58	44	113	41	18	56	188	96	164	68	145	87	184	169	191	80	32	85	30	17	12	52	41	61	35	81	70	54	68	69	48	42	62	73	81	51	62	48	31	41	17	27	24	34	11	37
chr1_30380390_hg38	chr1	30379269	30381512	2	2	7	1	1	3	6	2	6	2	3	2	5	7	6	5	1	3	2	0	0	1	3	12	12	35	48	38	46	41	36	20	29	32	30	18	21	25	15	20	107	53	82	30	18	42
chr1_30507326_hg38	chr1	30506122	30508529	25	17	20	17	3	19	11	10	11	20	19	7	17	8	9	39	16	78	8	8	2	44	12	73	19	25	14	23	24	17	25	25	16	17	20	24	19	27	22	30	91	70	83	18	6	15
chr1_30635884_hg38	chr1	30634701	30637066	21	19	41	31	9	46	67	19	54	49	32	31	100	45	60	39	11	27	18	11	4	26	10	28	7	16	15	14	10	10	14	9	16	28	8	12	26	10	6	10	9	4	16	5	3	14
chr1_30686080_hg38	chr1	30684739	30687420	90	46	130	31	4	37	44	25	27	46	28	37	34	16	31	72	30	69	67	9	8	92	10	74	5	23	19	13	31	40	21	19	25	21	15	15	19	16	17	16	28	35	44	16	14	18
chr1_30704765_hg38	chr1	30703711	30705819	104	63	172	52	34	85	52	13	57	82	36	57	59	20	55	82	14	92	21	22	16	51	10	76	5	10	10	12	22	13	17	7	14	16	5	10	14	7	9	18	43	16	32	68	29	66
chr1_30724066_hg38	chr1	30716535	30731598	716	940	1481	1137	759	2017	1078	576	2116	1166	1880	1691	1085	1237	1840	1018	642	1330	628	254	103	633	313	1377	522	571	268	170	686	682	997	472	1023	372	663	509	856	532	787	823	278	313	521	922	454	1454
chr1_30757376_hg38	chr1	30756318	30758433	79	121	144	147	126	258	101	72	223	131	324	206	126	189	281	98	136	190	22	9	9	79	59	174	55	91	26	22	60	82	117	81	103	55	66	70	147	100	91	98	27	48	89	123	60	191
chr1_30782916_hg38	chr1	30781780	30784052	136	121	244	132	86	251	134	49	234	180	188	188	126	101	211	128	111	165	18	12	6	97	21	159	49	60	18	17	99	108	80	56	80	59	67	49	77	55	86	77	29	32	50	41	42	99
chr1_30787836_hg38	chr1	30785492	30790180	319	234	522	221	100	285	242	144	344	370	337	281	314	248	383	293	145	278	36	30	7	155	68	285	98	119	67	43	148	163	168	123	143	112	107	121	270	157	143	168	36	66	100	102	93	258
chr1_30802111_hg38	chr1	30801001	30803221	66	88	164	110	53	224	101	57	166	134	135	179	93	99	148	109	38	133	54	35	18	62	25	114	32	51	23	18	82	60	77	54	64	38	46	20	68	42	50	78	48	66	51	61	35	89
chr1_30847774_hg38	chr1	30846141	30849406	133	155	234	230	159	284	222	127	259	270	296	278	282	276	274	212	71	268	42	29	15	121	67	254	60	89	39	20	115	79	125	77	105	75	99	60	142	91	92	117	62	72	114	158	74	212
chr1_30884948_hg38	chr1	30876401	30893496	803	794	1843	575	342	954	959	608	969	1046	1136	1020	818	654	1267	929	384	1092	327	307	233	688	294	1114	206	389	198	181	791	639	451	355	429	480	337	207	451	332	248	322	534	446	637	359	235	662
chr1_30902188_hg38	chr1	30899912	30904465	325	234	512	268	155	381	286	212	356	352	384	257	324	274	384	308	160	382	91	101	42	265	115	374	121	138	102	57	278	230	181	167	182	165	123	120	218	172	131	166	164	146	221	171	117	306
chr1_30909270_hg38	chr1	30905043	30913498	397	394	1068	458	202	924	578	247	643	670	698	581	572	420	657	607	260	674	417	186	123	435	109	689	144	187	115	89	420	312	287	201	238	204	156	105	285	194	184	218	222	231	265	192	95	362
chr1_30930494_hg38	chr1	30928880	30932108	113	129	198	114	104	153	190	87	164	147	179	143	143	136	161	150	46	127	82	36	27	108	51	150	37	54	55	50	77	77	82	62	50	58	38	36	53	63	57	68	36	50	55	81	45	116
chr1_30942558_hg38	chr1	30941550	30943566	17	40	30	21	30	44	61	45	30	26	56	64	32	25	39	41	15	27	11	14	14	30	5	48	29	42	21	7	36	25	47	22	46	32	19	18	39	31	23	47	19	23	30	39	28	63
chr1_30966096_hg38	chr1	30965045	30967146	28	56	53	34	39	59	76	55	39	53	55	53	50	36	41	37	10	70	70	48	25	50	15	49	19	29	32	33	27	38	44	24	30	36	29	25	59	43	33	39	79	56	84	72	47	93
chr1_31181975_hg38	chr1	31180750	31183200	43	45	191	30	17	61	87	28	93	75	115	73	76	69	118	59	42	73	135	136	54	40	10	79	16	33	66	70	70	34	35	27	29	39	31	17	23	21	20	20	20	31	43	28	20	55
chr1_31207825_hg38	chr1	31206411	31209239	45	129	76	102	135	121	136	129	150	86	296	146	111	330	145	93	127	83	78	65	66	46	60	88	13	31	50	70	34	24	30	15	17	20	15	7	27	27	20	16	13	12	18	19	12	28
chr1_31238956_hg38	chr1	31237161	31240752	80	62	153	73	55	134	105	40	158	124	225	141	133	196	131	92	42	95	591	261	117	87	18	90	11	21	129	138	43	22	23	16	39	31	15	22	25	24	20	29	28	23	26	24	17	30
chr1_31249528_hg38	chr1	31247585	31251472	43	75	70	15	22	42	31	26	31	12	47	20	34	60	25	25	10	39	441	203	177	32	13	51	4	20	116	122	62	35	31	22	42	30	12	10	27	15	4	19	24	15	28	17	12	41
chr1_31263054_hg38	chr1	31257925	31268184	44	129	130	41	118	106	176	92	121	49	130	111	64	97	111	63	56	85	1064	636	442	68	45	89	41	70	223	240	86	82	81	43	81	70	53	32	78	67	39	65	65	45	75	70	64	140
chr1_31296356_hg38	chr1	31294049	31298664	204	116	394	227	67	334	348	100	312	309	357	308	324	168	330	315	171	299	734	193	84	239	47	210	66	110	81	82	144	147	144	87	104	90	107	72	114	77	99	100	146	130	179	236	122	333
chr1_31413641_hg38	chr1	31412446	31414836	55	18	175	90	15	160	74	20	54	194	111	84	97	23	84	71	24	81	57	16	16	42	13	88	16	42	30	12	45	43	60	36	36	28	33	24	54	29	39	45	15	20	38	32	22	54
chr1_31435161_hg38	chr1	31433535	31436787	44	36	91	139	52	175	93	24	114	127	102	86	82	61	128	49	20	80	29	51	31	33	19	83	17	17	27	32	31	21	25	20	35	22	16	17	28	38	15	21	44	75	115	163	82	236
chr1_31482986_hg38	chr1	31481676	31484295	22	55	44	21	36	37	63	47	23	14	58	30	25	29	21	29	36	57	15	10	5	51	25	81	16	22	6	10	20	23	27	18	20	14	18	19	33	30	13	29	6	13	13	11	7	13
chr1_31549497_hg38	chr1	31548388	31550606	23	37	85	35	26	72	49	38	53	33	52	44	43	50	85	50	66	79	27	11	18	68	22	95	19	37	30	31	55	61	38	32	25	37	28	19	42	29	21	34	15	14	13	39	14	38
chr1_31575298_hg38	chr1	31572214	31578383	116	91	300	85	36	127	164	75	192	155	280	141	199	98	208	150	123	248	62	26	25	128	53	223	48	138	126	76	211	145	106	135	146	161	95	100	139	141	45	66	105	110	109	104	39	93
chr1_31584063_hg38	chr1	31582463	31585663	49	50	121	57	30	96	87	56	129	105	158	79	114	73	130	78	47	126	20	25	10	62	40	108	26	51	43	28	64	61	62	53	70	63	43	51	72	67	26	48	55	64	46	42	33	64
chr1_31617999_hg38	chr1	31616851	31619147	55	9	75	93	17	93	76	21	52	105	67	60	96	24	60	62	31	53	64	34	33	34	9	69	13	37	38	18	52	37	23	11	31	22	27	25	26	32	19	25	46	42	30	19	8	16
chr1_31627921_hg38	chr1	31625245	31630597	213	244	654	145	64	250	131	77	134	182	223	183	143	124	153	174	76	257	963	409	247	176	65	297	79	117	239	416	247	164	121	92	135	125	61	79	143	120	80	118	237	181	205	140	68	217
chr1_31644828_hg38	chr1	31643188	31646469	213	194	557	221	50	297	370	114	356	333	305	310	345	140	327	312	93	310	766	146	78	262	59	332	83	107	96	81	174	202	112	121	147	82	93	79	141	100	106	126	256	202	233	240	125	338
chr1_31670606_hg38	chr1	31664752	31676459	565	648	1622	463	187	676	494	263	773	638	657	675	556	469	705	630	288	900	1037	854	468	549	171	939	253	340	486	485	671	525	589	339	527	381	345	273	474	324	399	456	596	493	589	280	194	545
chr1_31698286_hg38	chr1	31690757	31705815	586	656	1306	1219	759	2184	1239	676	2390	1683	2202	2280	1365	1649	2221	1210	667	1588	230	224	176	742	333	1449	677	649	253	155	671	641	1077	500	1236	372	747	591	1121	582	961	885	295	463	581	615	537	1281
chr1_31714962_hg38	chr1	31713397	31716528	130	80	293	197	40	242	263	60	280	288	268	242	234	108	298	223	52	223	839	208	74	136	24	219	77	72	107	93	106	100	121	71	140	59	98	61	92	63	98	81	100	77	108	109	47	178
chr1_31724512_hg38	chr1	31723508	31725515	44	61	141	30	18	39	49	27	46	34	36	26	59	47	63	53	38	72	137	115	72	58	16	83	14	34	47	80	66	64	40	32	27	32	23	15	24	22	14	18	68	45	68	24	25	48
chr1_31734852_hg38	chr1	31731978	31737727	292	262	935	111	47	130	134	77	238	158	145	121	154	127	274	230	139	365	401	334	194	236	71	429	58	142	153	147	365	330	193	140	202	171	145	115	96	89	76	93	309	207	307	193	80	279
chr1_31754365_hg38	chr1	31750666	31758064	493	473	1323	612	232	917	689	315	1231	996	844	888	845	639	1297	773	359	1075	909	691	354	516	188	1011	260	305	241	225	649	522	548	305	597	305	353	259	346	254	424	466	549	403	653	764	401	1357
chr1_31761714_hg38	chr1	31758196	31765233	354	414	1483	432	190	948	484	253	1043	647	704	676	579	512	1073	557	209	936	708	512	263	422	128	869	228	273	193	158	525	522	421	315	439	275	322	252	263	163	359	338	449	340	438	424	198	698
chr1_31771162_hg38	chr1	31768927	31773396	183	261	879	158	54	202	174	98	441	173	155	166	187	203	460	183	53	390	399	344	187	182	41	397	58	124	109	163	328	334	184	147	144	141	143	90	120	94	94	112	351	200	289	163	84	249
chr1_31782535_hg38	chr1	31781302	31783768	160	135	357	112	41	114	166	82	242	154	153	144	200	162	251	208	59	204	202	176	113	168	44	251	31	64	22	25	121	104	78	60	68	70	73	70	69	54	62	56	95	97	119	150	76	233
chr1_31787958_hg38	chr1	31783817	31792098	416	451	936	491	254	783	663	332	1174	571	761	927	676	601	1143	590	286	801	616	381	280	446	188	780	226	259	197	206	399	329	452	226	423	210	285	215	363	243	358	354	317	283	401	430	231	670
chr1_31812762_hg38	chr1	31808971	31816553	351	612	710	634	474	900	891	425	1353	782	1090	1122	788	971	1287	651	336	807	640	503	156	377	217	733	261	271	212	125	320	281	408	189	470	131	319	229	340	243	357	394	195	192	295	322	154	558
chr1_31944495_hg38	chr1	31943139	31945851	139	92	178	196	97	201	314	118	284	335	278	250	323	193	307	236	78	181	34	33	18	160	37	221	43	91	33	22	79	110	92	77	86	83	88	59	100	89	65	80	77	76	104	108	73	230
chr1_32041430_hg38	chr1	32039389	32043471	100	194	125	149	288	237	402	197	279	156	354	213	196	280	234	210	143	185	79	53	22	158	68	205	68	121	37	36	83	101	136	62	154	66	86	91	146	110	139	145	73	64	98	151	83	281
chr1_32055986_hg38	chr1	32054788	32057183	42	67	71	33	86	121	123	66	76	37	114	85	46	64	70	80	33	98	28	28	13	116	41	87	46	81	30	25	57	90	83	53	103	56	75	49	121	59	76	96	82	99	97	129	85	250
chr1_32063018_hg38	chr1	32061716	32064320	78	104	174	111	71	143	198	81	159	121	190	169	147	117	167	140	80	177	160	161	71	146	54	174	63	83	43	44	97	104	86	65	85	91	66	66	91	54	99	107	144	83	141	170	68	274
chr1_32108406_hg38	chr1	32106587	32110225	137	131	425	207	79	373	313	96	351	314	401	314	256	157	343	252	123	318	378	173	115	247	70	282	95	155	98	73	153	213	194	133	168	153	160	119	190	142	133	180	159	155	182	238	116	392
chr1_32151489_hg38	chr1	32150490	32152488	27	62	38	23	45	60	82	32	21	29	46	30	22	32	36	28	30	43	38	22	15	41	16	49	23	31	22	15	32	34	43	29	20	24	19	25	27	31	34	55	25	20	30	37	26	62
chr1_32180268_hg38	chr1	32178049	32182487	208	219	794	288	118	504	472	165	488	442	499	441	425	221	559	425	194	456	810	183	77	333	88	474	108	180	178	135	194	230	213	166	228	164	173	122	203	133	151	153	176	115	163	187	96	277
chr1_32215999_hg38	chr1	32214935	32217063	70	44	108	77	24	125	71	45	123	93	118	92	60	54	113	96	28	94	49	26	13	77	21	101	32	58	42	33	65	79	62	45	69	52	48	44	71	44	39	59	70	76	116	112	69	189
chr1_32222290_hg38	chr1	32220659	32223922	199	114	418	232	61	266	347	103	274	405	287	314	319	155	315	330	124	301	484	88	88	296	50	266	62	108	70	42	121	129	106	88	116	98	97	66	117	66	80	110	86	75	124	145	70	212
chr1_32328292_hg38	chr1	32326392	32330193	67	125	153	161	163	363	215	78	279	160	219	263	159	133	241	145	125	219	26	37	18	94	54	188	35	42	31	21	67	49	79	37	69	30	37	32	97	51	55	74	71	50	117	165	110	313
chr1_32351342_hg38	chr1	32348344	32354340	380	269	845	509	208	940	639	234	993	690	768	865	646	483	977	631	249	776	813	244	124	419	90	782	194	262	136	125	267	293	332	213	326	210	228	187	357	224	240	295	167	172	237	367	184	629
chr1_32361998_hg38	chr1	32360263	32363734	179	88	348	246	61	416	262	83	407	354	304	267	398	118	384	297	52	307	189	94	38	211	31	309	78	105	94	69	134	177	136	132	123	120	118	97	123	95	119	121	65	65	94	149	70	208
chr1_32394565_hg38	chr1	32393011	32396119	175	159	445	196	60	334	354	95	309	261	316	283	274	156	348	264	91	297	580	92	86	235	55	265	56	65	69	58	95	114	110	75	102	66	68	61	98	48	63	80	147	114	177	261	98	418
chr1_32401167_hg38	chr1	32400081	32402253	49	69	97	36	42	57	62	25	65	48	61	92	49	35	66	68	52	73	103	23	44	80	18	100	22	22	33	26	40	29	38	20	30	32	22	17	42	19	19	24	49	33	51	46	31	58
chr1_32464810_hg38	chr1	32463301	32466320	60	45	123	121	55	195	138	44	106	96	134	93	122	57	97	120	56	121	200	48	41	112	16	107	44	58	46	43	82	69	87	53	56	49	49	44	91	47	66	71	42	36	71	54	48	89
chr1_32539804_hg38	chr1	32537782	32541827	90	77	212	149	84	165	225	105	164	165	214	158	225	149	222	179	57	119	286	149	80	142	48	160	18	43	37	35	59	52	70	31	62	48	53	26	41	38	51	51	70	60	82	139	78	186
chr1_32612626_hg38	chr1	32611204	32614048	68	57	118	98	42	120	120	45	93	123	112	85	126	99	78	100	50	85	105	56	43	76	29	95	36	45	25	18	46	50	48	40	42	40	42	16	32	35	33	64	18	15	21	19	22	35
chr1_32651019_hg38	chr1	32649067	32652971	178	210	514	215	87	420	443	152	446	319	427	370	266	196	374	300	128	382	755	198	102	281	75	325	99	125	121	94	142	224	159	140	184	127	143	116	158	120	129	136	252	200	233	342	204	528
chr1_32684656_hg38	chr1	32682754	32686558	52	123	116	66	90	116	282	117	87	74	148	107	106	128	116	104	53	128	60	31	32	143	53	114	45	88	46	45	84	89	80	68	83	58	48	70	161	92	74	113	110	102	104	155	73	137
chr1_32702770_hg38	chr1	32700675	32704865	192	173	471	236	66	257	299	100	230	380	288	319	290	106	267	296	63	337	93	90	48	293	73	332	82	140	48	41	173	170	145	114	125	133	85	76	175	112	78	133	175	163	189	114	86	196
chr1_32706914_hg38	chr1	32705914	32707914	42	48	52	16	11	45	46	31	20	33	34	54	15	21	27	34	1	55	20	14	14	41	14	41	10	34	42	26	34	16	30	26	27	37	18	10	22	13	19	13	22	26	42	22	19	32
chr1_32742418_hg38	chr1	32740390	32744445	167	79	261	148	41	201	206	59	128	291	169	189	240	79	177	221	49	178	116	54	30	172	37	206	64	160	85	74	173	157	126	124	139	141	113	79	173	140	90	100	115	92	166	102	48	136
chr1_32754709_hg38	chr1	32752800	32756618	153	157	583	149	42	135	170	62	141	182	177	134	167	91	181	160	62	218	193	95	51	201	51	261	34	49	40	43	123	126	62	60	67	58	53	40	69	66	24	50	178	129	121	69	43	111
chr1_32767067_hg38	chr1	32765905	32768229	97	87	154	37	17	44	56	32	31	51	58	38	33	39	49	75	27	83	35	21	10	92	38	95	23	58	34	27	75	65	34	46	27	55	22	22	44	30	20	21	60	60	66	33	31	72
chr1_32780552_hg38	chr1	32779314	32781790	37	33	86	26	34	40	82	42	54	33	52	64	47	34	89	64	42	76	103	70	44	68	30	92	29	49	86	70	48	66	46	38	46	43	33	32	53	37	19	35	56	34	51	43	21	61
chr1_32863184_hg38	chr1	32860558	32865811	171	288	562	52	50	98	277	171	231	78	156	162	149	121	278	149	69	277	628	304	213	182	75	347	49	79	213	239	217	179	86	83	123	88	67	37	74	57	34	52	230	116	160	103	52	204
chr1_32870140_hg38	chr1	32866864	32873416	262	269	762	127	52	208	268	116	321	241	243	275	248	190	388	244	179	326	1023	906	334	281	70	378	66	123	330	379	308	275	141	139	123	149	117	99	116	102	64	80	240	189	251	118	73	183
chr1_32901279_hg38	chr1	32899897	32902661	148	57	264	200	51	235	208	54	168	253	169	141	239	71	182	195	37	170	183	137	49	124	25	170	36	74	43	39	101	71	88	46	64	61	70	38	55	54	63	73	40	40	58	45	18	79
chr1_32940116_hg38	chr1	32938874	32941359	64	86	125	48	86	139	106	104	93	41	120	76	58	86	109	75	106	98	116	30	53	88	41	131	47	69	53	25	73	87	79	63	87	60	79	37	113	62	55	91	67	54	78	49	24	136
chr1_32999258_hg38	chr1	32996842	33001675	140	134	206	105	75	169	226	140	157	175	198	172	162	124	173	152	120	184	497	339	192	132	80	187	81	115	152	128	137	144	146	97	121	130	67	71	211	113	104	137	52	66	81	88	53	126
chr1_33006998_hg38	chr1	33004249	33009746	98	249	368	57	102	192	251	181	184	105	180	179	84	141	211	148	174	215	78	81	79	168	78	241	59	103	59	52	180	155	144	117	132	108	69	70	147	90	94	127	50	70	85	92	81	187
chr1_33011964_hg38	chr1	33010357	33013571	88	123	192	52	84	134	172	107	123	84	167	129	86	102	148	129	109	160	113	84	55	160	55	183	78	67	58	54	116	102	126	95	134	100	69	45	125	86	101	106	27	31	57	47	42	77
chr1_33026980_hg38	chr1	33024791	33029170	39	59	67	29	66	72	83	68	60	43	55	63	53	74	57	32	25	55	381	285	188	30	16	54	28	32	91	98	51	35	42	27	39	43	25	15	45	22	26	47	25	32	40	62	29	91
chr1_33036590_hg38	chr1	33035466	33037715	98	70	151	92	56	170	188	71	167	126	174	176	183	95	153	124	38	136	262	97	52	119	23	130	40	69	41	42	82	69	81	49	70	60	78	59	88	72	51	101	92	62	114	112	67	180
chr1_33056212_hg38	chr1	33054503	33057921	63	78	110	121	104	188	189	121	252	110	200	228	131	202	211	108	70	142	163	104	76	63	56	133	29	25	74	54	52	33	38	22	53	23	23	21	40	27	32	47	58	40	83	80	58	188
chr1_33060917_hg38	chr1	33059639	33062195	39	80	74	69	124	124	142	114	147	54	165	113	87	175	123	59	62	81	23	12	13	54	45	83	28	37	18	23	28	28	47	7	33	16	32	20	66	25	37	55	35	28	43	46	27	81
chr1_33075117_hg38	chr1	33071159	33079075	160	489	286	291	445	418	750	385	730	252	592	558	417	688	616	349	240	380	85	52	54	225	132	357	155	125	79	56	179	125	266	108	239	86	180	93	248	137	265	217	55	45	51	42	29	87
chr1_33084404_hg38	chr1	33079423	33089385	347	424	835	425	232	814	689	335	988	491	756	844	605	568	878	508	316	720	650	396	303	460	174	649	236	251	232	171	355	286	392	174	386	203	276	153	347	181	360	307	322	242	324	210	124	404
chr1_33153709_hg38	chr1	33149950	33157468	328	439	566	596	452	1043	778	329	1229	772	1123	1044	713	750	1056	650	389	735	684	545	265	333	199	680	314	343	262	124	357	305	506	253	543	191	362	267	411	344	466	406	241	262	343	823	442	1029
chr1_33181906_hg38	chr1	33180193	33183618	104	77	260	228	35	304	285	59	355	276	324	320	220	101	299	231	48	294	617	72	72	161	34	246	74	72	98	66	131	114	151	84	201	66	125	78	179	74	133	120	54	45	77	122	59	175
chr1_33257210_hg38	chr1	33254207	33260213	330	181	694	407	107	574	607	164	540	634	630	541	595	268	646	530	201	491	962	297	124	425	127	471	85	183	176	111	214	220	191	158	184	173	148	95	195	178	146	168	181	187	248	240	137	407
chr1_33268654_hg38	chr1	33267606	33269703	49	44	90	60	39	93	76	47	96	57	79	70	74	72	93	71	50	96	48	25	27	43	30	74	44	49	30	13	72	46	76	42	48	50	39	37	66	36	34	41	27	39	38	41	25	77
chr1_33271794_hg38	chr1	33270118	33273469	134	76	169	104	71	173	95	82	147	164	146	163	123	111	175	119	107	148	123	108	69	87	41	133	43	70	79	30	114	100	92	79	70	86	49	54	90	61	65	61	65	84	111	78	42	139
chr1_33297444_hg38	chr1	33293461	33301426	197	267	562	296	178	614	340	226	424	363	382	404	338	281	485	341	158	421	803	674	182	286	80	389	109	141	204	166	206	191	208	123	188	167	107	90	183	117	133	163	189	149	234	229	109	340
chr1_33340538_hg38	chr1	33337232	33343844	293	544	1106	332	479	1223	794	413	890	365	851	923	535	530	872	616	462	803	548	302	240	612	166	765	247	318	232	145	392	401	453	293	441	213	259	261	539	268	377	437	299	268	422	531	247	936
chr1_33348814_hg38	chr1	33346171	33351457	245	433	1044	282	290	986	685	293	885	487	840	756	435	461	915	568	271	785	1010	500	238	592	178	714	174	221	249	155	337	348	385	235	430	198	275	201	381	236	318	279	345	256	351	488	265	766
chr1_33366742_hg38	chr1	33360524	33372961	622	993	1553	747	800	2023	1312	815	2089	1005	1650	1561	1121	1451	1833	1149	696	1402	1689	1516	639	914	416	1375	514	509	385	296	730	618	846	491	818	389	598	475	704	503	707	667	884	683	922	1020	453	1830
chr1_33429737_hg38	chr1	33427648	33431826	110	106	355	152	142	350	283	110	310	177	274	237	226	140	369	220	88	230	412	158	120	168	43	215	84	95	88	67	139	151	129	113	130	66	126	81	129	65	118	96	168	130	137	153	79	231
chr1_33455957_hg38	chr1	33454678	33457236	56	41	118	60	69	136	117	53	129	53	101	112	69	65	120	62	57	95	33	17	7	46	23	79	32	53	32	24	76	46	57	41	50	53	55	19	62	32	50	48	97	66	78	68	35	79
chr1_33460426_hg38	chr1	33459009	33461844	74	134	216	34	43	106	128	54	82	35	120	84	64	83	102	81	16	75	24	6	7	82	46	76	35	61	30	25	131	94	52	57	60	58	47	30	48	46	44	42	111	124	136	60	35	80
chr1_33469626_hg38	chr1	33465181	33474070	246	392	546	353	299	659	559	275	672	404	622	572	482	420	674	377	203	479	649	336	251	308	157	461	186	221	199	155	322	298	339	186	259	161	176	158	293	192	219	252	324	270	362	312	188	588
chr1_33518104_hg38	chr1	33516885	33519324	28	74	120	22	11	22	68	26	34	18	15	13	39	31	33	39	13	40	11	19	11	49	14	58	6	20	15	22	48	47	34	26	25	29	18	11	18	13	6	14	13	18	22	18	13	30
chr1_33520770_hg38	chr1	33519713	33521826	43	36	60	24	0	22	27	16	16	17	30	12	16	19	28	29	22	22	9	11	3	24	17	33	8	11	17	16	47	46	11	27	33	35	20	14	23	9	5	16	13	21	24	18	10	21
chr1_33583302_hg38	chr1	33582302	33584302	16	40	35	3	15	9	25	13	9	0	16	5	4	28	13	18	12	8	50	9	11	15	3	12	7	10	22	20	72	31	17	11	30	26	8	7	9	4	3	12	141	72	84	37	25	38
chr1_33634252_hg38	chr1	33632438	33636066	87	69	143	74	33	145	101	46	123	74	72	89	97	63	110	67	26	112	48	46	12	40	12	85	22	25	21	28	114	59	54	30	40	34	26	18	35	28	29	41	143	107	119	170	120	204
chr1_33640686_hg38	chr1	33638841	33642530	26	82	98	46	107	119	169	99	141	27	99	98	51	78	99	74	54	81	29	6	11	73	38	73	29	29	13	24	65	35	71	33	47	30	30	18	53	32	43	63	110	99	145	313	172	380
chr1_33655812_hg38	chr1	33652553	33659071	150	306	369	83	84	229	185	108	208	86	112	139	128	144	176	180	60	219	69	30	18	114	65	184	22	30	27	40	234	103	64	33	53	57	30	12	39	39	26	35	184	174	149	302	193	364
chr1_33662226_hg38	chr1	33659978	33664475	85	170	174	40	83	78	163	76	104	59	86	61	75	78	115	108	58	120	34	22	11	104	45	116	15	22	25	19	104	54	31	29	37	34	27	22	18	23	17	19	104	105	81	120	75	136
chr1_33684355_hg38	chr1	33683207	33685503	26	50	86	22	32	68	53	43	68	29	34	45	28	36	41	43	14	34	11	2	5	26	8	38	10	16	16	10	44	35	29	15	12	14	8	8	11	11	14	7	42	37	42	114	55	169
chr1_33711724_hg38	chr1	33710699	33712750	42	82	139	12	16	18	34	27	22	13	18	8	21	25	20	27	14	32	59	44	16	20	19	27	6	10	24	21	73	29	17	9	25	18	12	9	11	8	8	9	49	46	47	44	13	57
chr1_33720169_hg38	chr1	33719094	33721244	40	68	67	14	31	27	86	39	51	27	34	20	49	40	42	50	24	36	19	4	5	20	23	38	6	13	19	11	48	23	13	11	17	13	10	7	15	16	3	15	28	18	38	35	10	70
chr1_33726198_hg38	chr1	33723574	33728822	192	299	319	24	30	53	68	53	60	27	35	26	47	41	59	108	62	121	68	26	10	113	47	141	23	37	34	46	246	126	43	36	55	53	21	16	28	16	18	16	196	138	162	79	45	118
chr1_33762680_hg38	chr1	33760063	33765296	114	250	325	13	27	35	68	35	31	19	37	33	31	25	38	86	92	121	66	19	12	112	50	129	9	23	48	36	148	107	37	32	49	57	15	21	18	16	10	21	137	78	108	47	21	54
chr1_33784548_hg38	chr1	33783488	33785607	27	60	86	15	5	23	19	16	11	8	14	13	11	29	17	18	30	47	43	13	14	38	8	47	6	9	26	13	46	21	10	9	16	10	7	3	12	14	3	8	27	33	34	27	10	35
chr1_33845286_hg38	chr1	33843267	33847304	40	64	76	63	72	73	157	109	82	65	88	48	84	139	75	66	47	49	28	22	11	51	28	40	20	47	29	25	58	37	36	25	42	36	27	13	25	26	21	25	41	40	41	97	35	105
chr1_33886523_hg38	chr1	33885444	33887602	27	50	67	35	63	72	93	47	51	35	41	48	51	48	75	28	19	37	27	6	7	40	32	33	11	22	11	7	39	14	14	5	12	20	16	10	10	17	6	9	22	14	31	44	23	67
chr1_33899110_hg38	chr1	33897995	33900225	37	74	102	81	63	100	127	75	115	77	72	73	122	99	128	53	43	83	27	13	12	60	26	64	18	29	19	15	38	20	22	20	23	20	18	12	22	13	12	24	48	40	89	109	60	184
chr1_33960838_hg38	chr1	33959396	33962280	76	95	133	87	84	144	168	106	159	74	91	103	161	140	198	78	50	106	12	4	9	69	44	114	20	43	22	20	54	50	29	28	26	36	41	19	26	18	18	23	50	51	60	123	61	185
chr1_33985860_hg38	chr1	33983872	33987847	105	215	389	110	106	195	141	73	240	89	122	169	140	133	215	106	65	156	105	96	56	90	49	162	18	32	69	98	106	61	38	46	41	48	32	25	31	23	27	34	107	56	136	195	97	365
chr1_34039224_hg38	chr1	34038171	34040278	47	113	80	25	36	30	70	28	64	18	36	46	32	73	51	40	29	45	19	3	19	33	28	51	7	8	9	11	32	17	14	6	10	20	7	9	14	10	7	11	18	17	14	32	15	52
chr1_34054970_hg38	chr1	34047293	34062647	359	913	777	459	698	850	1211	682	1431	538	827	902	743	895	1227	594	461	698	136	73	73	490	316	781	173	211	102	80	247	275	270	181	242	200	176	171	193	163	222	326	174	187	274	330	148	452
chr1_34066996_hg38	chr1	34065599	34068393	42	91	104	78	93	135	130	73	132	78	89	88	87	112	125	80	71	68	23	6	6	65	32	92	17	18	9	16	40	25	16	14	18	25	17	16	23	22	23	26	26	42	38	60	17	74
chr1_34070766_hg38	chr1	34069297	34072235	43	107	86	74	142	128	201	95	197	62	118	151	85	95	143	67	125	76	25	5	5	68	43	89	8	25	17	19	31	38	30	18	14	36	15	10	19	19	21	30	26	32	36	54	33	83
chr1_34075868_hg38	chr1	34074751	34076986	29	107	58	37	82	87	155	57	85	38	71	63	57	46	81	43	62	50	18	7	2	45	41	70	5	14	8	9	21	16	26	12	22	22	9	6	7	13	18	21	15	16	23	25	7	54
chr1_34127429_hg38	chr1	34125595	34129263	84	138	220	29	71	58	54	32	46	37	57	29	56	53	54	48	59	67	40	28	19	50	19	82	19	31	42	43	183	105	43	52	42	58	28	21	27	23	17	19	74	91	113	131	63	232
chr1_34145024_hg38	chr1	34143935	34146112	53	68	69	35	83	66	79	68	59	43	56	69	67	84	69	52	33	44	11	4	5	37	37	48	14	29	10	14	40	16	17	16	16	35	18	11	19	17	13	28	23	30	29	55	27	75
chr1_34177218_hg38	chr1	34176069	34178366	40	22	69	85	22	111	89	37	109	64	66	91	70	57	81	44	10	52	22	8	7	48	13	46	8	28	18	7	32	14	23	14	23	26	20	14	23	15	12	12	39	40	72	102	78	219
chr1_34267584_hg38	chr1	34265354	34269814	62	174	270	16	22	33	76	67	109	17	24	23	34	36	131	69	61	112	35	17	16	87	34	129	24	18	29	28	87	89	43	37	50	39	33	17	20	19	14	26	171	78	104	44	27	57
chr1_34413142_hg38	chr1	34412150	34414134	23	37	55	2	7	14	21	5	12	4	14	8	4	4	5	16	52	16	11	3	2	30	10	28	1	4	9	17	39	25	7	18	17	14	3	6	12	11	5	8	66	42	43	15	12	15
chr1_34684456_hg38	chr1	34682855	34686057	56	91	159	15	25	32	86	55	63	11	36	29	35	32	69	34	51	75	29	3	4	69	33	83	24	25	30	28	67	86	37	41	48	49	33	23	28	22	11	14	133	86	101	29	12	36
chr1_34688359_hg38	chr1	34687224	34689494	10	16	20	27	29	63	53	28	35	18	40	25	22	26	35	18	18	26	18	7	2	23	8	26	24	28	15	11	23	14	28	18	34	25	33	17	49	26	33	33	7	6	14	10	8	8
chr1_34722010_hg38	chr1	34721008	34723013	30	32	65	6	15	15	21	9	3	5	9	11	6	15	11	16	13	25	7	10	2	33	20	31	12	7	8	12	42	30	19	11	16	15	6	6	11	3	4	12	54	33	44	11	5	10
chr1_34741112_hg38	chr1	34738582	34743643	45	77	134	71	63	205	105	97	148	54	87	71	117	104	174	64	27	109	55	33	15	52	34	95	40	47	43	34	92	65	67	34	52	56	66	32	43	29	49	48	58	67	73	65	25	100
chr1_34745068_hg38	chr1	34744045	34746090	19	32	63	10	8	27	34	42	62	17	13	14	27	38	90	26	5	45	20	10	1	19	14	43	14	14	11	12	27	21	17	10	24	16	22	3	11	8	8	10	14	15	28	10	6	29
chr1_34781756_hg38	chr1	34780558	34782955	56	32	119	38	14	47	51	8	33	40	32	34	52	16	42	50	7	47	38	14	2	30	14	50	11	25	29	20	53	66	22	31	14	42	24	14	23	20	19	26	8	14	23	11	9	29
chr1_34786784_hg38	chr1	34785380	34788187	73	95	153	85	33	145	106	61	126	92	87	101	79	63	122	88	74	139	37	12	19	73	36	134	26	29	42	25	78	51	55	32	35	51	30	25	39	21	26	32	41	42	80	66	43	91
chr1_34793092_hg38	chr1	34791302	34794882	78	63	191	57	22	94	97	64	163	104	182	124	131	54	159	128	62	186	43	18	14	74	27	159	28	53	38	28	56	62	61	38	61	74	41	42	62	60	24	49	55	53	58	36	15	52
chr1_34796480_hg38	chr1	34795386	34797573	30	65	62	33	57	94	43	32	52	33	92	50	50	47	78	40	55	76	11	8	5	29	18	86	18	26	26	16	30	26	60	29	35	36	18	21	31	36	29	33	18	27	27	36	16	35
chr1_34832332_hg38	chr1	34830943	34833722	45	53	61	123	77	165	102	75	140	70	108	90	93	88	108	83	60	105	30	18	21	53	37	91	29	33	22	15	40	31	73	32	46	44	44	20	59	44	52	64	28	27	51	47	21	49
chr1_34845215_hg38	chr1	34842051	34848379	203	254	239	377	217	465	333	235	425	320	346	298	384	330	400	314	290	354	90	60	67	215	117	338	82	151	107	74	175	159	180	114	153	167	91	110	170	140	103	151	142	124	200	144	70	214
chr1_34852394_hg38	chr1	34850605	34854184	68	104	166	73	48	214	122	62	171	63	134	173	109	84	141	118	70	176	105	42	40	111	28	186	34	42	58	27	93	95	89	71	68	66	60	39	78	70	47	72	113	87	111	104	57	171
chr1_34859158_hg38	chr1	34857777	34860540	95	114	346	155	70	241	226	90	255	233	243	220	204	132	289	224	126	252	251	97	90	195	47	246	80	105	90	60	149	162	115	110	138	102	118	86	94	90	100	108	129	114	137	175	79	238
chr1_34871168_hg38	chr1	34869554	34872783	112	238	425	28	15	68	82	68	139	34	74	63	56	86	181	98	102	242	191	93	133	140	93	302	30	43	125	90	206	169	79	60	87	71	48	26	46	28	15	23	205	122	145	48	34	60
chr1_34876636_hg38	chr1	34875307	34877964	62	130	141	9	3	13	39	41	27	12	22	17	41	32	35	45	12	51	432	134	119	61	24	69	10	18	115	114	63	49	17	16	23	40	14	10	16	14	12	9	69	53	54	16	9	11
chr1_34885354_hg38	chr1	34884353	34886354	105	87	201	43	6	40	86	19	55	57	36	41	61	17	85	60	18	73	353	96	33	64	19	97	20	31	85	69	122	110	38	33	24	48	36	15	22	24	13	16	111	83	79	28	19	36
chr1_34914884_hg38	chr1	34913174	34916595	147	142	203	12	11	29	77	46	58	19	58	68	35	61	97	82	54	115	155	115	119	108	33	154	9	37	115	76	100	96	31	36	37	71	25	17	28	18	13	11	124	82	94	21	10	33
chr1_34919757_hg38	chr1	34917286	34922228	191	235	604	22	10	29	77	59	218	47	78	98	61	104	291	161	82	257	239	231	163	165	61	287	21	21	165	124	219	150	55	42	87	65	67	29	28	22	7	16	253	140	139	32	32	36
chr1_34926748_hg38	chr1	34922326	34931170	248	494	1672	100	18	120	139	163	436	166	208	199	148	174	646	248	137	624	1152	460	303	422	91	623	43	106	439	307	529	509	175	184	246	202	161	73	66	69	40	49	551	296	351	68	40	90
chr1_34977877_hg38	chr1	34974881	34980873	111	102	253	51	32	77	100	67	94	90	129	99	84	78	116	126	55	141	565	333	153	110	39	152	18	41	72	66	80	77	52	59	61	53	44	22	54	45	20	37	117	107	124	63	31	74
chr1_35031282_hg38	chr1	35029379	35033186	110	131	306	125	87	183	247	97	213	150	264	200	196	165	272	171	137	246	342	118	70	207	55	214	29	35	24	45	51	46	70	43	59	40	41	38	41	26	46	37	131	70	118	118	66	174
chr1_35079538_hg38	chr1	35078330	35080745	106	118	228	138	59	155	189	56	146	166	216	182	178	105	181	147	34	169	270	101	27	142	31	165	49	78	60	38	94	98	106	56	78	67	86	71	92	83	92	81	89	85	87	114	58	185
chr1_35210676_hg38	chr1	35209485	35211868	50	67	115	33	17	20	33	35	26	31	43	31	32	29	39	49	16	53	9	9	5	67	24	71	24	46	33	28	81	72	49	44	42	64	31	21	56	39	18	46	110	61	79	33	27	37
chr1_35269074_hg38	chr1	35267340	35270808	131	91	256	147	71	162	266	85	178	221	191	180	211	62	212	201	48	150	389	149	83	156	57	194	61	71	88	68	112	117	98	92	104	84	88	59	114	78	69	89	81	58	78	109	59	129
chr1_35298481_hg38	chr1	35297381	35299581	23	25	60	24	35	109	81	36	60	28	59	53	29	38	63	31	11	51	32	17	16	30	23	56	26	37	26	24	38	29	49	19	30	32	33	22	57	48	32	49	35	34	39	36	16	66
chr1_35302076_hg38	chr1	35300779	35303373	22	37	50	25	21	40	60	30	34	37	42	31	38	39	34	26	52	36	19	12	24	31	17	40	20	27	20	17	42	52	35	27	31	25	22	18	62	21	17	36	36	26	29	17	16	42
chr1_35320420_hg38	chr1	35319349	35321491	13	15	19	29	40	26	55	37	29	11	24	26	19	20	34	26	25	22	16	0	11	27	14	21	20	32	14	19	25	13	35	14	38	21	18	18	33	34	24	44	12	12	9	27	9	31
chr1_35363570_hg38	chr1	35361923	35365216	21	51	75	38	82	78	169	78	79	45	77	57	65	49	117	45	94	75	23	18	23	64	25	63	39	55	27	13	34	53	51	26	67	23	28	40	84	45	50	52	29	18	38	59	26	62
chr1_35370372_hg38	chr1	35369115	35371630	9	35	47	14	59	46	56	26	29	28	54	33	29	41	48	16	9	53	22	28	4	32	12	43	27	22	10	7	26	19	35	17	24	12	19	20	32	20	26	38	37	47	22	69	38	61
chr1_35435002_hg38	chr1	35431413	35438592	180	107	296	176	131	301	290	163	352	253	316	269	268	223	359	235	107	247	129	143	54	165	85	239	59	149	95	100	140	140	148	79	113	148	86	69	152	116	82	127	115	115	181	173	84	271
chr1_35449767_hg38	chr1	35443776	35455758	221	463	888	148	262	652	667	436	549	197	495	555	288	296	782	281	270	582	193	79	68	435	185	502	136	218	127	101	298	284	290	205	236	220	156	160	322	208	193	250	202	161	269	192	105	313
chr1_35471331_hg38	chr1	35470134	35472528	33	73	86	30	54	53	190	65	71	42	74	73	56	57	86	67	16	60	36	13	8	47	19	56	13	28	15	13	36	27	22	14	23	25	24	20	30	28	14	27	38	42	55	77	43	116
chr1_35500472_hg38	chr1	35497086	35503859	50	173	237	59	103	100	191	110	147	76	129	151	73	122	143	75	70	157	458	300	212	100	66	181	58	63	180	166	119	89	84	50	91	74	30	38	73	77	75	81	81	70	107	103	57	122
chr1_35506718_hg38	chr1	35505546	35507890	35	57	87	11	25	28	94	53	52	38	52	69	32	33	77	33	33	56	140	59	56	64	25	83	10	37	31	48	44	25	33	21	32	38	25	20	26	29	13	25	32	27	45	34	12	60
chr1_35539420_hg38	chr1	35537275	35541565	72	206	296	37	99	141	287	227	317	95	161	196	138	166	337	108	73	209	156	76	64	185	74	218	55	100	75	35	128	110	92	66	78	74	78	46	108	79	61	88	138	121	165	141	80	220
chr1_35545040_hg38	chr1	35544038	35546042	45	59	96	27	29	93	98	52	94	53	78	97	66	66	118	38	45	98	26	20	22	54	24	86	34	36	28	14	61	33	37	23	31	31	24	20	52	20	32	37	28	24	43	56	30	77
chr1_35560942_hg38	chr1	35554314	35567570	595	570	2140	740	247	1253	839	353	1780	985	1082	1211	909	581	1877	936	339	1458	2740	1262	525	804	161	1329	313	375	748	596	770	801	625	436	720	351	529	352	528	398	455	533	804	511	750	1004	462	1528
chr1_35577634_hg38	chr1	35576624	35578643	43	23	59	44	10	71	73	20	58	99	84	85	56	27	64	38	17	61	34	30	11	40	14	60	13	38	19	20	27	32	38	25	25	26	27	15	35	25	21	26	15	18	34	40	31	85
chr1_35641347_hg38	chr1	35639763	35642931	110	103	300	161	69	228	235	74	228	222	230	178	247	166	251	165	82	210	319	115	33	157	28	191	43	81	62	43	85	124	90	72	93	67	85	53	91	78	76	82	107	104	109	140	84	200
chr1_35708184_hg38	chr1	35706512	35709855	133	73	276	162	51	202	209	51	174	242	169	178	202	122	180	181	40	208	131	104	46	130	35	220	32	44	32	27	76	69	73	42	61	41	45	38	62	42	44	50	58	51	70	56	32	95
chr1_35717061_hg38	chr1	35713668	35720454	281	355	1162	344	159	555	501	200	644	513	607	602	432	380	698	452	281	729	554	306	180	486	155	802	253	219	225	173	447	436	420	259	434	243	293	209	307	205	328	272	501	311	471	429	246	748
chr1_35726196_hg38	chr1	35724086	35728307	81	120	155	133	128	223	198	103	263	133	206	223	134	161	254	126	84	163	71	30	34	92	51	167	93	72	30	29	101	74	136	50	106	69	78	65	109	54	110	124	92	104	139	275	181	468
chr1_35845256_hg38	chr1	35843489	35847022	43	177	100	90	132	212	306	112	202	84	207	145	126	205	181	112	97	132	28	36	22	104	69	147	65	59	21	30	62	50	92	40	92	42	57	50	87	49	71	67	30	21	46	45	24	70
chr1_35884967_hg38	chr1	35881318	35888616	280	229	559	383	190	636	521	231	526	465	649	520	493	296	518	429	244	476	731	266	170	360	154	505	165	242	232	183	307	308	312	217	268	220	247	176	371	204	214	223	239	188	268	347	176	597
chr1_35924140_hg38	chr1	35922818	35925462	9	28	33	22	52	104	80	51	54	25	63	49	23	19	46	18	8	46	39	12	22	35	15	42	40	46	26	22	53	35	87	32	74	37	42	40	75	56	80	81	29	22	39	47	22	57
chr1_35930582_hg38	chr1	35928275	35932889	195	151	482	260	128	611	422	144	478	385	470	421	372	177	496	338	72	409	620	167	58	254	56	411	139	197	125	104	171	240	247	140	249	134	230	127	219	171	198	191	213	153	185	250	125	368
chr1_35936528_hg38	chr1	35935415	35937641	18	32	28	30	53	88	97	51	59	37	44	50	63	40	58	30	31	30	12	9	7	44	14	34	11	31	9	4	20	21	36	17	29	16	15	22	26	37	36	46	24	36	21	52	36	57
chr1_36015316_hg38	chr1	36014406	36016226	10	17	25	13	41	59	38	11	24	14	33	20	20	26	27	22	26	28	15	8	6	20	5	20	20	19	18	12	13	17	21	9	36	14	22	9	31	23	30	34	13	16	29	51	30	90
chr1_36068880_hg38	chr1	36066349	36071410	63	184	89	129	280	197	444	174	237	102	239	208	241	333	221	148	137	168	37	31	27	121	61	141	61	69	21	24	48	61	109	53	106	49	68	65	72	72	102	108	68	86	92	229	143	213
chr1_36084638_hg38	chr1	36083167	36086109	115	60	153	219	66	211	221	85	237	327	193	220	267	130	215	156	32	158	131	67	38	118	30	146	59	93	81	64	111	106	111	63	112	79	105	45	117	93	90	84	94	89	110	106	80	163
chr1_36093948_hg38	chr1	36087137	36100759	626	406	1328	1105	465	3159	1019	423	1885	1589	1692	1969	1007	668	1696	1023	396	1267	3860	1394	444	657	221	1214	470	552	888	612	623	735	831	526	844	450	635	435	783	610	755	767	383	351	554	545	307	855
chr1_36115222_hg38	chr1	36112461	36117983	67	54	120	119	65	178	122	60	127	210	148	188	112	83	109	76	53	105	1496	751	334	84	43	126	55	72	283	197	77	77	89	52	79	89	67	45	130	59	67	79	38	59	112	106	54	178
chr1_36136647_hg38	chr1	36134937	36138357	90	138	255	73	115	265	119	77	147	101	163	215	87	63	151	108	46	147	753	234	186	103	52	145	54	85	280	165	83	108	131	80	102	80	60	47	191	79	89	132	76	93	147	127	73	198
chr1_36156016_hg38	chr1	36148147	36163884	1180	1239	3540	1494	936	3850	2121	938	3964	2205	3686	3512	2092	1784	3775	2213	1095	3003	2945	1383	959	1619	491	2824	943	1057	826	457	1216	1319	1554	897	2021	662	1144	876	1336	940	1381	1223	1031	918	1434	2013	1134	3756
chr1_36175526_hg38	chr1	36174090	36176961	223	139	431	242	93	395	242	83	301	334	312	275	301	161	380	249	111	308	622	246	68	212	52	334	109	146	140	62	195	258	221	164	223	114	139	165	241	175	156	258	156	112	156	187	86	317
chr1_36306976_hg38	chr1	36305411	36308540	131	60	268	150	49	221	167	45	192	235	180	165	199	50	173	211	52	186	552	67	38	141	24	185	11	47	41	28	34	52	43	34	35	35	29	36	41	33	29	52	57	34	92	89	46	132
chr1_36322654_hg38	chr1	36320025	36325283	159	47	347	217	34	353	313	62	291	446	429	313	319	82	323	270	90	292	154	55	16	214	25	274	76	151	92	44	132	169	134	123	158	158	119	101	154	143	94	93	77	81	112	99	62	143
chr1_36350345_hg38	chr1	36349007	36351683	95	67	165	206	75	249	117	55	85	188	166	145	103	91	108	122	54	140	138	156	46	119	29	123	30	58	50	28	85	78	77	60	53	62	45	36	88	53	69	66	96	92	140	111	74	219
chr1_36367748_hg38	chr1	36364503	36370992	216	278	503	261	195	659	303	249	475	285	443	455	289	333	418	290	181	463	392	395	266	241	135	455	135	145	218	144	236	249	238	145	207	149	120	94	242	139	190	190	217	182	294	304	147	504
chr1_36385742_hg38	chr1	36382510	36388974	395	408	1232	353	210	775	628	250	874	474	699	781	496	360	961	526	245	868	701	210	128	468	126	759	164	211	169	88	330	341	315	243	327	218	245	136	343	197	241	235	391	263	343	364	202	627
chr1_36397536_hg38	chr1	36396302	36398771	117	108	423	185	45	267	229	65	236	245	252	247	220	102	278	207	70	280	371	150	51	174	37	246	71	74	110	62	105	151	139	92	152	65	111	82	127	98	83	95	167	150	227	186	114	361
chr1_36450728_hg38	chr1	36449132	36452325	133	70	268	192	39	156	215	61	191	222	214	203	285	100	234	181	64	169	473	130	76	139	25	186	43	61	63	36	67	60	58	42	45	50	71	29	73	37	44	39	102	85	97	110	55	171
chr1_36465034_hg38	chr1	36462637	36467430	208	127	395	251	73	352	299	144	287	320	347	269	331	162	349	248	121	276	385	110	81	238	48	279	86	146	90	87	145	222	154	132	128	127	127	93	184	121	114	146	143	114	154	141	83	246
chr1_36482656_hg38	chr1	36481267	36484046	49	47	69	48	28	106	100	54	54	132	193	96	83	68	93	81	65	70	33	10	4	73	30	84	9	16	14	13	13	29	13	14	19	21	24	16	36	23	13	17	22	14	21	37	21	44
chr1_36516496_hg38	chr1	36515103	36517889	29	15	36	49	22	68	39	28	40	61	71	42	29	24	20	25	41	35	11	9	6	21	15	39	18	34	32	23	43	46	42	26	28	50	34	23	36	33	34	40	32	29	36	26	20	65
chr1_36583294_hg38	chr1	36581234	36585353	69	112	196	33	28	33	43	51	32	32	37	22	32	38	32	37	9	80	33	14	6	49	20	98	25	28	30	27	85	71	45	25	40	47	41	13	25	27	25	25	44	32	54	38	15	61
chr1_36605988_hg38	chr1	36604230	36607746	121	150	237	19	28	44	55	30	43	9	33	15	30	41	43	123	96	205	25	12	10	107	48	179	14	31	25	24	92	106	36	30	55	52	25	19	30	24	16	33	55	38	64	30	19	28
chr1_36626310_hg38	chr1	36624277	36628343	175	205	314	31	18	37	90	63	72	28	39	20	72	73	119	130	149	183	16	10	8	136	61	218	22	32	36	25	162	135	53	65	73	53	25	26	30	32	12	23	78	76	86	47	21	41
chr1_36655406_hg38	chr1	36650962	36659849	92	170	162	152	287	472	271	166	244	123	235	192	205	270	212	167	96	170	46	18	24	114	66	168	61	115	64	61	112	136	137	100	103	90	79	104	256	97	118	198	58	61	101	141	114	293
chr1_36664238_hg38	chr1	36663234	36665242	20	42	41	3	20	34	23	21	17	12	28	19	11	25	12	16	7	30	12	1	2	16	7	31	7	19	14	11	43	25	16	10	21	18	11	13	17	10	14	5	31	29	27	24	15	22
chr1_36692702_hg38	chr1	36691067	36694337	50	81	194	47	33	82	44	26	45	42	29	43	38	31	26	34	37	78	10	10	9	25	17	59	9	21	33	39	121	59	44	29	46	33	16	19	19	11	13	27	24	19	25	16	11	23
chr1_36705080_hg38	chr1	36702562	36707597	112	149	198	163	146	235	181	117	233	183	209	219	173	239	206	158	77	185	44	33	38	110	48	177	40	53	40	34	103	70	52	47	72	50	41	46	101	44	45	75	48	55	59	44	30	67
chr1_36737389_hg38	chr1	36735640	36739138	41	78	122	21	14	23	68	42	48	22	24	21	43	47	67	57	42	102	15	3	4	72	23	132	11	40	16	12	49	62	49	40	45	53	29	24	48	23	19	36	69	54	75	30	12	29
chr1_36807546_hg38	chr1	36806545	36808546	16	14	33	28	19	25	33	20	40	32	34	41	30	29	45	34	35	54	23	23	26	43	14	61	25	29	18	20	34	33	53	38	28	25	23	40	49	27	22	26	37	32	64	68	37	103
chr1_36846302_hg38	chr1	36844662	36847942	75	124	169	32	13	31	52	35	22	46	52	55	46	29	31	87	11	72	41	41	28	70	27	88	22	37	20	22	65	60	49	32	30	45	24	21	76	37	24	51	82	54	87	58	23	72
chr1_36863403_hg38	chr1	36859606	36867200	85	80	149	108	97	122	195	104	68	134	135	98	127	174	95	130	83	99	55	35	24	115	49	98	145	184	82	48	144	167	234	133	198	141	169	151	359	163	156	237	67	90	157	201	90	249
chr1_36871474_hg38	chr1	36869714	36873233	103	104	192	35	29	46	142	82	83	96	72	46	161	105	130	101	24	100	116	55	45	89	38	101	43	82	43	34	113	113	96	62	80	44	78	64	127	60	56	95	92	77	89	51	38	100
chr1_36947084_hg38	chr1	36945724	36948445	45	84	126	10	19	35	24	14	17	45	38	43	20	13	12	61	60	83	54	75	63	51	29	98	10	31	33	27	87	74	44	26	39	44	14	17	23	18	22	20	76	51	47	26	15	33
chr1_36951979_hg38	chr1	36950263	36953695	55	81	142	23	10	28	56	32	25	77	66	67	34	30	29	69	38	133	49	65	64	71	31	161	6	6	8	15	32	32	21	18	21	20	11	12	17	10	10	11	95	68	69	45	16	50
chr1_36982733_hg38	chr1	36981454	36984012	52	69	166	64	23	62	65	47	53	71	59	53	50	51	65	70	71	111	44	34	25	39	28	121	20	35	25	20	93	73	54	33	42	48	31	23	52	34	26	47	21	29	38	30	24	83
chr1_36989344_hg38	chr1	36986731	36991958	120	181	219	253	196	302	247	134	210	291	265	282	213	195	184	181	111	261	53	41	24	141	62	260	93	120	52	46	135	87	133	79	110	97	73	98	182	102	110	135	101	93	124	240	160	434
chr1_37035610_hg38	chr1	37031538	37039683	162	156	509	218	97	315	237	79	313	314	314	321	243	171	298	264	88	389	116	52	36	242	46	392	48	100	61	51	208	275	129	165	152	162	72	106	174	89	56	115	226	180	237	172	97	264
chr1_37064260_hg38	chr1	37061077	37067442	98	271	195	256	280	340	276	181	508	172	323	455	223	356	424	164	221	258	43	15	15	88	77	239	156	126	58	42	164	141	242	98	216	101	137	108	257	107	225	205	60	83	134	236	112	545
chr1_37071143_hg38	chr1	37068687	37073599	44	130	83	158	171	222	141	139	271	127	123	222	116	230	187	93	107	125	28	20	14	52	42	107	79	80	32	27	79	79	156	72	142	72	92	73	258	82	124	149	39	45	107	168	87	317
chr1_37135072_hg38	chr1	37130015	37140130	254	503	617	146	214	336	331	315	464	146	377	365	260	544	499	222	328	418	60	18	29	242	207	451	41	85	47	69	284	247	144	113	118	134	65	60	104	75	49	66	272	246	342	162	97	275
chr1_37157680_hg38	chr1	37155504	37159856	61	132	93	109	185	180	346	146	279	121	267	297	145	244	234	133	116	124	26	13	13	74	83	127	11	14	19	20	16	22	20	14	19	27	14	13	24	20	19	18	32	26	33	29	18	41
chr1_37170483_hg38	chr1	37168077	37172889	65	93	65	121	131	129	245	125	173	138	194	133	120	221	162	112	118	111	39	7	16	91	73	107	10	25	24	26	38	34	27	23	29	43	26	18	51	19	21	22	53	50	55	46	33	72
chr1_37234779_hg38	chr1	37232653	37236905	45	84	62	59	113	108	171	112	140	74	119	120	89	146	120	48	91	58	35	8	13	46	48	54	12	25	18	17	29	23	27	16	10	31	18	22	25	23	15	29	28	35	53	81	51	133
chr1_37239992_hg38	chr1	37237749	37242235	87	89	181	43	63	84	102	80	108	52	44	42	67	115	112	69	41	98	19	8	6	70	32	99	10	30	28	27	66	78	36	24	34	57	22	19	18	23	11	14	49	46	78	47	32	80
chr1_37266612_hg38	chr1	37264640	37268584	108	184	222	46	74	72	74	69	81	79	114	71	82	146	94	118	129	132	13	7	5	111	72	143	16	42	25	29	122	153	50	48	58	52	21	24	21	23	13	13	169	128	141	48	22	75
chr1_37294230_hg38	chr1	37292104	37296355	105	141	246	40	42	87	74	54	82	85	66	92	61	97	57	136	185	215	23	9	13	110	58	242	7	43	27	20	82	121	56	50	75	67	19	19	31	30	23	20	83	106	120	52	32	85
chr1_37307624_hg38	chr1	37305206	37310042	114	169	169	238	179	217	240	138	206	215	282	232	211	356	183	194	122	213	47	40	30	124	67	174	23	76	33	23	85	119	85	75	68	70	46	43	77	48	34	60	106	100	139	113	57	314
chr1_37318400_hg38	chr1	37317239	37319562	43	47	78	73	59	86	75	22	72	72	86	76	75	83	66	53	51	57	14	8	8	30	28	59	19	40	17	15	67	76	52	40	32	43	18	31	48	38	25	48	14	21	49	38	26	118
chr1_37326257_hg38	chr1	37323837	37328677	69	119	85	130	179	193	219	137	200	139	217	243	138	285	155	121	153	150	35	13	8	65	49	112	54	124	38	26	54	111	110	79	69	58	52	82	119	101	66	146	78	93	203	334	171	610
chr1_37338832_hg38	chr1	37337663	37340002	19	51	30	40	46	77	76	52	59	34	88	91	38	58	39	26	50	40	6	4	3	13	22	34	17	24	13	13	29	25	35	20	38	24	18	26	23	21	37	48	25	37	102	124	80	283
chr1_37363098_hg38	chr1	37362099	37364096	41	51	46	22	56	47	43	33	47	30	37	35	36	43	49	43	75	70	13	9	5	31	15	39	12	21	21	11	33	33	50	21	27	30	21	29	30	30	21	47	34	21	70	69	32	132
chr1_37410672_hg38	chr1	37409310	37412035	66	110	189	16	27	18	93	61	53	25	20	18	52	62	60	49	40	83	20	6	6	56	21	94	12	20	22	13	46	47	21	28	23	28	10	13	15	12	7	7	51	36	49	24	15	39
chr1_37416145_hg38	chr1	37415128	37417162	37	61	90	5	3	11	45	15	13	5	9	10	12	14	24	13	21	46	4	1	6	36	20	58	3	11	11	7	54	39	13	14	14	22	4	11	6	5	4	11	4	8	4	22	8	25
chr1_37455311_hg38	chr1	37454258	37456364	41	36	86	62	26	84	76	35	52	71	72	61	84	37	67	55	24	58	59	35	19	51	9	41	16	27	21	14	42	47	37	21	23	23	26	22	30	18	30	23	35	42	64	95	53	145
chr1_37476463_hg38	chr1	37470559	37482367	707	506	1701	746	352	1494	829	359	1110	1258	1264	1156	993	632	1088	799	427	930	1519	900	439	554	160	895	282	347	304	179	571	467	487	331	405	326	312	260	511	345	361	438	425	380	633	1025	525	1691
chr1_37486430_hg38	chr1	37484711	37488149	128	85	206	125	42	205	132	74	149	206	176	180	167	85	189	159	39	149	69	51	30	95	40	159	53	77	56	37	131	86	121	87	73	84	60	60	129	85	71	107	109	105	177	207	117	348
chr1_37514628_hg38	chr1	37512826	37516429	159	119	519	185	52	285	315	112	347	336	339	351	287	167	408	311	94	310	597	164	89	232	55	322	100	115	146	103	198	222	171	104	162	102	169	89	143	114	128	131	201	117	172	196	100	307
chr1_37554000_hg38	chr1	37552783	37555216	64	35	142	109	27	125	134	54	97	164	110	95	145	39	107	149	53	101	224	35	36	90	24	100	32	46	39	24	40	60	39	30	49	63	44	43	44	52	40	76	48	31	63	80	33	131
chr1_37557139_hg38	chr1	37555883	37558395	86	84	188	79	16	42	104	44	90	104	80	112	92	43	82	121	53	89	73	21	36	125	34	120	18	35	31	35	50	49	38	18	19	25	28	15	50	27	20	29	28	22	21	36	31	67
chr1_37595982_hg38	chr1	37594398	37597565	71	72	168	108	34	107	191	54	158	125	149	126	144	76	153	98	70	130	202	76	45	126	20	117	23	49	30	27	32	52	57	38	44	38	41	29	41	31	42	58	93	59	64	117	57	157
chr1_37676330_hg38	chr1	37674893	37677768	75	59	75	43	33	81	152	62	46	98	143	93	58	56	55	80	35	64	37	13	10	65	33	84	14	42	28	29	34	42	39	29	38	50	28	30	67	28	25	30	37	36	49	48	19	76
chr1_37690880_hg38	chr1	37688597	37693162	162	71	420	259	53	265	253	61	447	397	367	411	320	143	391	260	26	306	467	93	57	199	26	250	82	87	84	56	136	110	128	72	141	86	129	87	127	103	120	115	131	103	142	200	117	343
chr1_37794017_hg38	chr1	37791562	37796472	157	68	336	105	36	89	229	49	164	168	156	152	201	82	204	175	41	187	940	228	91	157	32	195	26	94	173	155	150	211	76	103	83	117	96	78	59	51	50	41	100	77	91	34	20	61
chr1_37813050_hg38	chr1	37806561	37819540	475	618	1060	734	435	1229	1283	454	1500	879	1381	1356	1072	927	1382	1015	539	1186	1028	249	156	730	191	1052	161	412	288	182	340	539	383	393	483	316	274	345	528	341	309	535	492	368	655	961	486	1609
chr1_37931548_hg38	chr1	37930117	37932980	54	25	107	112	29	84	115	37	76	149	143	94	137	55	114	91	22	103	250	51	36	75	28	73	30	52	26	23	35	55	59	34	43	26	37	22	72	29	36	41	56	38	75	114	47	161
chr1_37989874_hg38	chr1	37988729	37991018	101	67	238	131	28	162	142	51	205	230	202	173	183	85	196	149	35	168	205	65	22	116	16	158	6	6	9	4	6	10	12	12	9	6	11	2	9	8	4	3	63	64	73	96	51	167
chr1_37996684_hg38	chr1	37995099	37998270	127	70	267	122	26	158	152	67	145	224	245	177	197	65	180	171	80	197	42	23	8	141	48	220	48	97	34	18	88	102	104	98	92	88	80	66	105	77	63	88	123	107	135	119	66	174
chr1_38000509_hg38	chr1	37998297	38002721	160	156	507	179	103	318	278	146	362	336	473	414	260	179	410	278	140	425	55	26	24	242	66	375	113	168	90	45	190	222	186	192	169	159	141	90	250	151	96	145	184	230	290	215	125	406
chr1_38004962_hg38	chr1	38002738	38007187	216	140	421	161	63	242	188	108	223	373	302	297	275	143	257	289	167	301	117	22	42	239	64	297	58	113	87	47	159	186	119	133	133	162	95	76	148	125	93	87	139	129	186	111	91	223
chr1_38013062_hg38	chr1	38011735	38014389	125	99	241	164	52	143	247	81	159	192	199	167	205	139	196	188	45	152	330	93	43	141	27	176	41	94	64	28	76	96	96	64	55	67	78	42	105	68	71	78	82	61	89	145	46	173
chr1_38029126_hg38	chr1	38026309	38031944	176	134	289	174	104	247	225	134	262	325	279	214	263	185	221	213	47	243	107	70	44	185	66	249	162	176	87	52	213	204	210	144	194	170	176	107	348	148	224	346	140	126	167	145	87	273
chr1_38035076_hg38	chr1	38033822	38036331	29	21	29	50	30	48	57	43	68	49	42	26	44	53	65	18	40	47	16	6	2	26	21	34	54	50	18	18	53	41	90	23	80	28	82	52	105	36	84	98	14	22	27	24	15	56
chr1_38085536_hg38	chr1	38083883	38087190	42	36	50	53	41	53	66	45	66	81	64	62	64	70	59	49	28	54	27	6	6	30	24	54	49	35	21	22	58	47	76	34	58	48	53	32	70	47	70	88	26	21	48	56	28	120
chr1_38116418_hg38	chr1	38112817	38120019	218	275	548	57	30	63	136	118	119	105	111	103	116	104	152	178	134	258	42	32	16	163	69	244	43	79	51	43	231	164	85	79	120	119	83	45	81	58	37	64	215	127	122	78	46	199
chr1_38132592_hg38	chr1	38129341	38135844	170	180	370	51	32	88	114	57	87	138	81	102	108	68	89	132	71	177	48	26	16	173	77	214	41	68	38	20	145	112	69	58	67	71	62	36	76	49	49	57	151	114	118	81	52	180
chr1_38139384_hg38	chr1	38137151	38141617	89	134	236	98	111	147	82	67	121	103	143	140	74	115	138	88	59	152	45	29	32	83	54	163	102	118	46	36	167	125	174	74	159	104	125	76	168	117	165	164	138	114	161	168	112	320
chr1_38274226_hg38	chr1	38271944	38276509	23	18	33	31	24	50	59	26	34	53	42	35	45	60	42	17	24	32	26	17	12	24	31	36	87	98	34	31	94	84	140	48	132	46	98	74	139	76	151	121	94	106	173	275	155	626
chr1_38292252_hg38	chr1	38291175	38293330	12	10	18	23	8	22	47	16	21	50	31	41	30	15	35	23	17	24	12	12	3	35	13	30	19	42	17	20	34	25	32	11	28	30	23	23	32	32	16	23	15	16	25	29	23	59
chr1_38328535_hg38	chr1	38326748	38330322	53	69	78	21	25	37	124	83	92	39	37	40	94	91	152	43	60	40	17	20	4	79	20	75	45	63	20	12	59	82	67	32	43	57	57	35	41	46	49	58	58	75	74	118	59	218
chr1_38331846_hg38	chr1	38330846	38332847	21	30	42	3	3	15	44	31	34	11	19	14	36	30	52	28	33	39	12	0	7	34	12	47	12	20	14	19	26	36	23	15	45	28	23	6	10	12	14	13	36	21	34	26	15	59
chr1_38456664_hg38	chr1	38455576	38457752	18	23	26	27	24	32	32	17	13	20	20	25	21	24	24	19	5	27	10	4	7	24	6	22	22	29	13	14	22	19	42	15	20	18	26	31	37	36	26	53	8	10	16	11	2	29
chr1_38476606_hg38	chr1	38475276	38477937	64	27	56	73	38	61	129	44	65	150	92	68	130	66	97	114	40	77	28	11	9	83	28	61	16	16	8	14	19	16	20	12	13	14	22	12	25	19	17	20	23	22	32	25	29	74
chr1_38548790_hg38	chr1	38545904	38551675	78	257	210	82	334	214	400	249	346	121	283	300	130	196	271	132	254	240	30	4	14	94	95	170	107	108	41	34	109	103	163	46	128	63	111	88	154	102	128	160	57	50	100	148	93	248
chr1_38564965_hg38	chr1	38563640	38566290	40	51	69	27	24	28	66	37	57	50	42	46	40	57	47	33	16	45	19	6	12	27	15	42	13	33	20	17	58	35	36	19	21	21	15	26	24	17	21	28	27	30	29	16	14	42
chr1_38579780_hg38	chr1	38577337	38582223	60	70	180	32	44	48	72	40	75	79	54	59	75	63	65	56	58	83	26	15	9	76	23	65	29	39	33	23	62	59	51	37	46	30	49	41	43	49	42	45	130	87	63	34	37	77
chr1_38671443_hg38	chr1	38669776	38673110	21	20	36	29	29	128	101	30	105	30	25	104	43	24	104	36	26	52	20	3	7	36	15	43	18	17	16	25	12	17	20	29	14	36	18	15	37	11	15	17	11	7	14	14	10	21
chr1_38728476_hg38	chr1	38727190	38729763	17	16	40	16	11	33	44	26	28	41	33	38	29	11	67	30	21	27	15	9	2	40	11	47	15	17	14	9	15	16	12	14	17	22	12	8	17	23	9	18	36	49	46	29	29	59
chr1_38804290_hg38	chr1	38803217	38805363	31	9	37	19	6	19	55	24	36	52	24	13	48	22	31	20	2	17	13	8	3	27	4	20	9	14	14	11	23	12	6	20	12	8	24	9	18	16	5	13	12	12	20	12	12	14
chr1_38816360_hg38	chr1	38812964	38819756	72	65	149	106	79	186	209	115	248	138	114	107	171	131	276	83	68	115	55	18	13	65	35	114	97	137	38	39	83	83	133	67	73	84	132	73	121	91	87	165	52	56	63	84	45	194
chr1_38859734_hg38	chr1	38857821	38861648	191	138	411	267	118	366	386	136	411	342	407	374	320	195	388	319	126	296	527	103	57	250	51	288	92	116	81	60	112	161	141	103	131	95	119	74	155	124	129	137	186	142	189	301	151	552
chr1_38863968_hg38	chr1	38862729	38865208	15	64	69	26	72	90	160	83	88	34	53	64	47	33	82	31	34	66	31	14	11	62	32	44	24	30	16	17	38	33	45	34	41	17	33	31	65	46	31	48	34	31	16	46	18	65
chr1_38873315_hg38	chr1	38871602	38875028	87	68	169	124	46	136	172	49	141	175	156	130	161	59	158	159	23	152	399	84	31	135	34	123	37	50	48	62	89	73	84	68	70	49	73	45	69	52	55	70	117	87	113	141	60	203
chr1_38929480_hg38	chr1	38925084	38933877	180	384	349	347	412	567	855	286	825	330	757	676	567	598	733	436	376	523	66	34	39	287	147	441	229	194	78	39	173	171	372	155	382	105	215	156	263	228	310	345	203	187	337	629	369	1195
chr1_38941736_hg38	chr1	38940264	38943207	42	68	100	133	92	198	146	69	222	183	209	180	142	124	213	117	56	135	37	17	19	53	50	134	73	78	29	16	55	57	113	56	89	36	64	57	88	72	83	96	39	40	50	64	38	173
chr1_38991790_hg38	chr1	38989551	38994028	169	190	440	250	122	409	535	142	421	440	439	385	354	190	380	361	142	330	650	207	86	311	69	348	97	111	134	98	144	168	186	116	209	87	135	103	195	126	134	167	149	104	155	260	124	362
chr1_38996896_hg38	chr1	38994637	38999155	48	158	105	105	201	205	268	175	163	118	241	144	141	278	148	107	92	121	61	57	36	125	58	140	57	78	42	22	77	77	100	59	85	48	69	52	102	73	104	121	67	67	76	135	71	210
chr1_39086020_hg38	chr1	39079592	39092449	572	737	1457	260	168	501	702	419	688	504	573	641	487	377	839	746	323	940	2164	763	561	814	214	1152	157	237	491	497	553	484	284	255	315	345	210	129	273	181	157	201	695	418	597	247	158	429
chr1_39098342_hg38	chr1	39097238	39099447	66	86	134	52	55	72	93	70	105	54	96	109	68	72	128	91	85	118	118	39	32	86	25	125	29	47	43	46	79	58	55	49	38	44	38	17	49	28	33	50	49	33	54	39	27	77
chr1_39158768_hg38	chr1	39157398	39160138	47	108	139	57	121	130	218	143	171	62	172	141	103	166	175	100	68	101	44	33	24	116	47	134	39	84	32	23	54	60	62	42	52	50	60	37	83	57	45	51	42	54	75	94	54	164
chr1_39165182_hg38	chr1	39164182	39166183	27	59	46	20	77	69	145	88	82	31	72	70	32	40	75	48	39	54	52	21	28	64	35	54	34	42	34	54	35	28	53	27	27	30	20	34	61	34	31	46	42	41	71	90	58	145
chr1_39191974_hg38	chr1	39190723	39193226	45	174	194	69	84	137	183	104	175	72	151	129	113	152	175	90	126	151	68	25	30	123	48	156	48	77	37	27	63	77	83	44	89	59	55	46	75	62	45	68	65	54	61	85	64	116
chr1_39200182_hg38	chr1	39198861	39201502	32	162	92	91	169	138	219	140	198	84	182	159	138	245	208	104	118	123	30	40	28	103	70	112	27	40	19	11	32	26	47	30	43	38	18	19	45	28	39	47	22	41	44	47	41	74
chr1_39204876_hg38	chr1	39203485	39206268	91	246	264	87	227	346	391	271	393	115	423	372	197	271	389	208	186	309	72	19	36	217	123	300	101	117	40	21	132	139	160	106	131	108	116	92	181	124	126	147	102	121	146	210	113	386
chr1_39214062_hg38	chr1	39211737	39216388	146	306	321	187	402	436	550	338	673	198	668	616	270	479	616	298	231	445	78	47	54	247	138	390	201	225	90	52	186	209	346	167	366	128	225	173	276	212	315	317	217	253	382	588	333	1073
chr1_39237946_hg38	chr1	39236174	39239719	64	202	216	107	245	288	312	193	302	116	294	308	187	297	302	146	160	237	50	44	31	165	88	227	90	118	47	31	104	104	169	79	129	74	100	93	173	88	105	165	123	114	152	349	197	499
chr1_39293702_hg38	chr1	39292604	39294799	18	83	75	29	105	114	162	112	112	48	77	101	51	36	132	36	100	88	29	12	13	49	33	95	28	52	18	20	42	36	51	33	42	35	30	55	84	39	33	56	58	49	72	105	51	132
chr1_39310829_hg38	chr1	39309830	39311828	18	44	44	8	49	53	106	52	57	18	44	62	42	47	59	29	45	57	29	16	11	45	27	43	20	29	13	27	24	37	25	29	25	23	27	27	45	24	41	50	29	30	31	52	22	62
chr1_39332190_hg38	chr1	39330212	39334167	83	258	221	94	196	302	446	183	370	146	274	268	194	177	358	189	164	186	94	25	18	192	88	234	68	114	59	47	81	126	120	100	120	82	74	88	154	111	114	145	72	76	65	82	40	98
chr1_39358720_hg38	chr1	39357719	39359720	30	69	72	21	37	67	91	50	55	23	63	47	21	34	50	44	5	50	73	46	28	70	28	61	14	34	28	27	61	41	46	36	50	33	25	25	54	33	26	41	35	32	31	44	18	55
chr1_39398556_hg38	chr1	39397110	39400002	46	143	123	53	151	163	243	166	155	97	164	149	162	189	139	114	160	134	38	37	41	125	74	146	54	82	40	21	76	99	74	63	84	60	67	74	110	92	56	105	53	55	88	122	90	183
chr1_39452413_hg38	chr1	39451077	39453749	54	81	108	57	103	139	214	95	164	69	122	117	115	102	119	89	47	103	29	7	14	79	23	107	25	39	18	22	33	33	38	32	40	26	31	23	44	36	27	45	53	52	41	51	27	76
chr1_39492250_hg38	chr1	39488339	39496162	199	170	561	348	127	513	320	112	365	402	320	258	385	210	368	341	102	358	192	87	56	228	60	315	139	223	202	168	270	243	243	169	232	170	199	159	202	167	162	209	191	84	125	80	43	144
chr1_39499523_hg38	chr1	39496674	39502372	163	256	431	135	85	241	104	75	118	65	91	83	70	100	104	124	89	190	45	35	19	128	47	189	32	63	75	79	146	61	68	48	55	58	39	29	63	27	31	47	68	38	54	39	14	55
chr1_39540485_hg38	chr1	39538004	39542966	122	189	263	171	158	349	462	192	333	148	381	258	319	379	345	280	180	224	62	43	21	241	103	269	104	138	52	40	142	153	141	127	176	85	127	112	183	121	124	167	70	44	80	93	24	154
chr1_39567108_hg38	chr1	39566108	39568109	4	29	30	11	23	29	37	19	19	4	20	24	17	21	23	16	16	33	48	44	20	20	6	25	13	21	41	44	22	15	19	9	11	13	12	5	28	15	15	10	22	10	16	17	8	13
chr1_39575772_hg38	chr1	39573206	39578339	146	110	400	242	91	394	305	100	318	305	358	246	315	158	313	290	64	302	451	150	78	236	61	270	92	128	142	125	170	200	181	142	153	131	164	111	211	143	145	165	98	72	110	138	81	195
chr1_39625884_hg38	chr1	39623886	39627881	77	72	157	52	25	108	112	77	144	153	235	209	102	76	151	122	69	166	40	31	51	96	45	201	52	96	63	37	98	99	126	70	117	84	83	51	120	90	72	77	102	125	139	87	80	184
chr1_39633935_hg38	chr1	39631241	39636629	61	50	178	75	69	139	165	107	165	148	282	168	112	109	237	108	101	149	47	23	27	98	40	150	117	131	67	44	146	143	192	122	194	127	131	110	165	148	158	169	85	108	155	107	91	253
chr1_39639862_hg38	chr1	39638657	39641066	25	24	73	53	17	66	60	36	63	76	108	79	57	38	79	62	19	86	35	19	13	32	11	68	18	34	22	21	33	29	32	22	34	27	25	17	32	17	19	28	27	31	41	37	27	61
chr1_39653994_hg38	chr1	39652813	39655176	69	114	151	51	44	111	84	64	83	47	79	95	61	54	96	64	75	120	230	89	78	90	47	140	29	33	71	58	80	71	61	27	65	36	46	29	56	34	33	51	56	58	59	31	21	45
chr1_39657122_hg38	chr1	39655284	39658959	93	159	249	41	29	100	96	54	72	50	101	77	51	66	77	122	56	154	358	257	170	119	50	152	45	50	151	98	111	112	92	55	77	73	52	33	73	49	58	71	105	78	103	60	48	89
chr1_39671685_hg38	chr1	39669742	39673628	147	141	504	90	32	118	140	21	125	141	178	163	132	44	158	167	38	252	856	345	119	179	36	255	32	67	251	180	171	166	106	89	98	69	68	48	70	57	45	69	215	149	159	116	56	133
chr1_39687970_hg38	chr1	39682608	39693332	402	286	993	222	62	276	316	119	381	337	302	339	309	135	506	416	130	602	2247	1003	624	404	117	669	114	154	582	492	379	417	234	220	255	209	173	88	158	123	130	169	344	290	345	148	96	258
chr1_39701618_hg38	chr1	39700232	39703003	66	70	151	42	44	89	57	44	74	59	57	84	50	57	83	96	56	124	103	48	59	108	46	133	20	38	28	26	53	74	68	35	43	35	16	24	27	35	19	43	28	35	30	17	13	40
chr1_39739275_hg38	chr1	39737880	39740670	117	140	222	125	46	149	169	68	187	162	171	161	178	100	189	161	53	173	295	120	87	126	31	152	38	38	35	51	76	57	60	45	48	39	42	40	63	41	43	55	82	76	74	124	50	171
chr1_39754570_hg38	chr1	39751930	39757211	244	207	378	81	41	123	103	59	114	145	116	108	92	70	92	236	108	256	442	297	140	201	65	325	39	79	131	87	195	175	99	109	132	140	59	48	110	62	64	67	233	178	199	140	74	170
chr1_39779705_hg38	chr1	39778699	39780711	22	32	22	42	31	62	31	37	32	26	35	44	23	40	39	20	38	22	17	10	3	14	19	29	12	12	12	8	22	21	24	9	12	18	22	9	20	27	16	41	11	17	16	18	8	31
chr1_39844282_hg38	chr1	39841431	39847134	84	223	170	96	218	310	351	227	225	131	273	203	177	185	236	136	131	204	138	72	66	177	78	187	41	93	56	41	84	77	104	74	59	75	71	38	114	70	61	83	80	61	106	96	49	172
chr1_39853319_hg38	chr1	39851645	39854993	23	64	61	25	36	57	82	74	62	16	32	35	38	81	75	24	17	74	233	177	140	74	20	51	9	17	38	47	34	26	22	18	16	25	19	11	21	12	9	18	21	14	25	29	12	34
chr1_39877868_hg38	chr1	39875214	39880523	81	252	217	157	285	303	540	222	326	185	357	283	282	272	307	221	171	227	80	35	62	206	95	230	54	80	46	39	83	53	98	47	89	62	58	60	206	70	86	125	57	59	73	85	77	181
chr1_39883577_hg38	chr1	39882020	39885134	103	68	167	106	80	178	194	76	166	178	127	145	164	106	175	141	48	136	287	96	51	106	23	110	36	51	44	33	80	71	66	40	66	42	48	32	73	40	52	65	85	57	93	108	60	143
chr1_39886646_hg38	chr1	39885457	39887835	42	107	147	15	27	47	80	52	60	15	35	34	36	40	73	56	52	86	71	120	44	68	17	98	7	23	16	30	48	55	23	25	38	41	21	12	26	18	6	15	75	44	55	22	17	33
chr1_39897034_hg38	chr1	39895937	39898131	50	74	80	64	55	93	78	45	112	43	79	78	82	96	90	53	30	82	15	22	19	37	20	64	15	20	24	15	48	38	35	28	39	41	18	13	40	21	17	30	36	40	52	35	26	74
chr1_39901556_hg38	chr1	39899593	39903520	129	70	293	217	49	317	230	70	245	205	257	201	267	97	301	216	58	222	324	96	40	151	32	236	39	64	43	48	87	98	61	65	48	84	58	56	71	51	42	59	60	39	72	48	18	68
chr1_40040970_hg38	chr1	40038029	40043912	219	198	673	286	123	440	456	248	610	438	641	489	410	302	687	390	235	561	619	170	110	391	100	524	99	167	122	72	191	224	218	150	261	147	190	119	192	132	151	159	236	193	294	354	184	503
chr1_40060130_hg38	chr1	40059088	40061173	20	54	74	12	36	75	117	68	95	23	80	67	54	69	95	30	55	81	24	15	7	65	28	92	19	18	35	9	37	33	29	18	27	33	20	20	22	21	26	17	95	33	47	54	26	64
chr1_40076488_hg38	chr1	40075443	40077533	41	77	128	24	25	48	82	66	79	19	54	41	37	57	120	42	47	77	33	10	7	69	11	80	12	19	16	16	40	46	23	26	26	34	20	12	20	17	12	20	51	38	37	25	13	44
chr1_40133058_hg38	chr1	40131943	40134172	33	16	50	48	15	48	63	15	44	84	59	45	50	22	43	58	2	35	22	7	4	48	10	44	22	33	15	4	30	33	43	17	22	22	26	22	35	25	28	27	45	37	40	40	16	61
chr1_40245367_hg38	chr1	40244364	40246370	17	42	21	10	16	14	28	18	30	8	21	13	35	23	24	12	11	28	88	49	36	25	14	25	4	10	28	37	25	23	9	8	12	17	8	14	11	12	8	5	11	10	13	25	1	18
chr1_40258126_hg38	chr1	40256542	40259710	142	141	520	149	77	311	287	106	383	264	364	311	212	144	386	228	89	358	397	164	43	193	71	331	69	103	137	68	159	135	159	79	147	64	134	87	97	66	105	70	188	151	171	207	82	324
chr1_40311216_hg38	chr1	40303424	40319008	485	467	1240	1442	533	2050	1380	512	2855	1794	2151	2224	1519	1149	2590	1173	504	1580	234	134	88	641	228	1485	570	464	208	152	467	476	857	377	1180	236	657	445	959	519	898	722	462	461	782	1434	784	2405
chr1_40373948_hg38	chr1	40372046	40375850	124	187	635	157	73	290	222	108	433	218	454	327	216	127	435	237	156	394	465	153	81	207	52	355	120	125	148	100	205	231	232	174	254	127	159	132	170	131	185	153	219	163	210	253	115	365
chr1_40389894_hg38	chr1	40381213	40398574	287	1329	1128	272	583	694	1427	904	1125	427	1190	878	595	931	1197	654	733	1118	221	155	135	837	389	979	264	338	166	113	549	491	523	346	489	332	294	289	690	340	385	378	631	540	667	800	477	1114
chr1_40410280_hg38	chr1	40408543	40412017	23	123	93	31	96	93	278	132	151	63	133	114	94	63	143	62	107	97	39	17	13	89	44	99	37	63	25	24	48	50	83	29	75	24	54	39	101	47	56	62	38	43	53	86	49	117
chr1_40421790_hg38	chr1	40420553	40423028	57	60	115	30	93	135	153	113	115	43	176	102	99	110	157	86	109	90	31	19	7	79	50	91	29	45	27	10	29	41	44	19	55	21	38	30	52	35	36	49	44	45	60	103	41	132
chr1_40450404_hg38	chr1	40448505	40452304	113	163	504	107	59	184	233	88	286	163	242	217	179	149	376	163	59	290	299	185	80	179	47	254	42	53	60	56	99	88	82	42	98	57	89	39	92	49	71	66	107	63	97	97	66	149
chr1_40478346_hg38	chr1	40476438	40480255	75	51	149	155	91	249	258	77	223	227	184	191	245	114	211	151	38	206	255	88	72	128	21	178	66	112	91	75	110	80	120	64	100	75	111	72	154	82	130	101	37	32	56	47	38	95
chr1_40508982_hg38	chr1	40507356	40510609	96	64	200	181	60	130	168	74	173	206	181	127	203	77	213	123	46	160	266	109	52	111	25	192	54	98	83	70	92	76	98	46	80	78	76	60	101	67	77	109	87	82	94	139	82	190
chr1_40532091_hg38	chr1	40530506	40533676	67	149	244	62	80	109	174	106	170	94	183	205	133	148	208	102	85	140	240	112	72	110	67	177	59	75	65	61	77	87	86	53	59	39	75	45	71	58	49	77	71	63	62	77	41	154
chr1_40586832_hg38	chr1	40585333	40588331	58	145	110	19	29	30	20	23	11	21	24	35	13	24	15	26	71	65	13	6	14	80	39	86	9	11	16	11	43	31	21	13	23	28	13	9	18	16	14	11	27	20	46	15	9	24
chr1_40622482_hg38	chr1	40620969	40623996	137	205	285	19	17	25	39	52	30	14	42	20	32	38	47	109	61	127	118	78	86	162	61	199	14	28	72	62	130	116	50	47	50	58	17	10	13	16	11	6	194	114	127	36	20	36
chr1_40625690_hg38	chr1	40624572	40626807	99	78	231	32	17	38	36	25	33	35	57	36	30	16	28	84	18	119	194	98	61	97	30	133	10	24	42	40	84	103	48	66	36	63	37	23	45	26	15	22	43	54	81	14	14	30
chr1_40635510_hg38	chr1	40633114	40637906	167	220	383	40	62	119	157	124	113	90	111	82	108	100	189	120	55	158	292	276	160	135	61	190	27	58	88	74	147	131	55	54	69	63	47	37	43	40	41	30	132	79	100	20	24	47
chr1_40639820_hg38	chr1	40638253	40641386	137	166	262	26	38	84	80	50	77	24	53	50	51	54	68	105	32	145	87	60	112	102	48	157	10	28	28	35	95	75	31	37	37	43	24	9	24	18	13	14	104	46	68	27	15	29
chr1_40651350_hg38	chr1	40646495	40656205	458	641	1160	94	60	113	234	205	370	137	240	221	256	230	471	405	267	655	1028	1163	803	452	175	859	57	132	245	359	472	452	153	189	208	243	139	85	83	88	41	62	530	299	401	80	49	87
chr1_40691978_hg38	chr1	40690371	40693586	160	149	697	184	99	429	363	132	570	269	545	533	284	175	617	283	103	512	766	216	82	263	53	492	136	158	179	111	203	266	211	169	253	122	200	120	169	172	185	190	272	210	248	329	171	488
chr1_40710156_hg38	chr1	40708068	40712245	67	231	278	59	147	207	326	167	201	67	203	211	136	119	242	132	141	246	334	64	65	224	92	219	78	106	78	87	110	98	99	69	110	65	66	63	125	85	95	99	209	141	158	213	85	249
chr1_40754906_hg38	chr1	40753647	40756164	59	109	153	36	50	75	156	77	90	55	92	84	53	55	106	103	66	115	57	31	34	117	51	121	16	54	21	16	51	53	43	39	43	38	26	27	35	43	25	37	45	48	73	53	36	75
chr1_40757790_hg38	chr1	40756494	40759087	56	106	131	26	22	44	82	33	54	61	48	61	53	32	67	74	36	107	22	18	14	104	36	116	25	46	23	17	60	69	44	47	56	56	35	25	47	39	20	36	55	63	66	56	31	94
chr1_40768637_hg38	chr1	40764413	40772861	202	169	306	121	160	209	351	206	267	159	261	246	197	203	293	207	138	300	227	75	80	234	102	344	72	132	104	118	179	151	129	111	140	147	107	87	174	98	81	140	128	119	160	154	105	282
chr1_40784184_hg38	chr1	40781577	40786791	157	85	241	139	51	186	246	99	183	273	217	175	259	77	200	232	63	188	596	226	80	186	42	213	40	152	99	71	153	141	76	88	74	107	100	73	165	94	68	62	61	67	109	111	68	307
chr1_40802372_hg38	chr1	40801306	40803439	68	50	91	104	47	93	108	67	60	106	79	72	99	56	63	84	34	78	42	38	28	90	24	86	29	67	45	19	64	52	68	50	46	54	35	29	69	54	38	48	64	45	82	102	49	173
chr1_40861749_hg38	chr1	40859784	40863714	136	50	216	246	34	165	210	36	236	310	226	235	255	73	208	217	44	174	386	59	48	144	15	170	53	83	61	53	90	119	79	100	82	72	88	89	127	74	60	80	38	42	37	34	14	44
chr1_40884344_hg38	chr1	40883340	40885348	37	17	37	53	28	58	38	9	48	61	43	47	63	26	48	44	11	40	20	5	3	26	8	41	12	23	9	4	21	20	24	16	15	19	10	14	20	19	23	24	11	9	16	16	7	19
chr1_40902639_hg38	chr1	40901591	40903687	38	44	59	75	54	104	77	35	106	65	82	124	75	67	101	49	25	72	19	4	7	31	18	66	24	30	9	12	28	29	49	27	32	19	28	33	68	29	31	56	4	6	9	17	10	14
chr1_40980142_hg38	chr1	40978159	40982124	193	160	483	300	58	298	344	70	382	401	379	348	341	134	379	333	78	370	975	166	75	250	60	327	81	117	116	95	160	178	160	103	183	98	123	82	162	99	137	165	107	85	111	99	61	161
chr1_40986382_hg38	chr1	40984472	40988293	69	127	185	26	23	57	127	95	125	25	62	82	60	70	170	100	92	168	168	81	36	86	46	123	29	35	36	39	104	75	61	47	67	48	53	30	65	32	22	43	82	63	64	37	28	52
chr1_41015939_hg38	chr1	41014549	41017329	45	53	61	49	20	55	65	35	59	38	71	50	51	44	62	44	26	59	183	117	34	33	24	46	22	34	93	67	43	53	40	33	49	34	31	20	55	26	27	32	42	45	68	54	41	110
chr1_41020460_hg38	chr1	41019463	41021458	48	32	69	47	18	42	41	30	52	78	54	61	80	48	70	88	33	64	26	30	6	49	16	74	25	49	39	30	58	53	42	52	40	47	17	34	62	43	20	36	45	40	69	28	25	45
chr1_41037160_hg38	chr1	41036254	41038067	13	15	20	4	1	22	23	34	13	8	22	12	8	12	19	13	5	21	5	5	3	22	15	19	1	18	40	46	14	9	12	14	9	31	7	6	17	8	5	10	13	13	11	12	1	20
chr1_41046715_hg38	chr1	41045461	41047969	34	55	57	18	13	32	47	27	27	28	41	52	22	17	24	33	64	68	96	71	50	39	21	32	9	33	45	56	38	23	22	21	25	29	17	10	28	29	9	8	43	50	55	38	14	54
chr1_41242487_hg38	chr1	41240037	41244937	219	97	461	234	95	395	334	114	336	423	394	326	377	139	372	324	69	342	732	178	79	262	35	370	104	170	122	98	171	224	214	139	172	148	169	127	162	153	128	140	43	41	59	57	47	107
chr1_41269006_hg38	chr1	41268007	41270005	17	27	48	29	30	40	44	29	42	9	40	28	23	10	52	21	18	57	36	15	48	31	18	57	23	16	12	18	31	45	42	24	27	40	13	22	28	18	20	40	14	20	27	21	7	34
chr1_41276551_hg38	chr1	41273913	41279189	52	72	67	41	39	73	70	56	46	47	77	65	56	51	40	40	44	79	197	121	200	60	37	74	30	52	92	76	62	48	50	43	48	59	30	28	53	37	35	39	42	51	77	44	14	48
chr1_41283091_hg38	chr1	41282091	41284091	17	19	21	28	15	46	29	10	22	46	30	32	29	21	22	30	23	34	15	15	20	27	14	35	16	25	16	14	27	23	31	27	20	19	19	11	23	18	17	31	13	16	25	19	15	26
chr1_41294248_hg38	chr1	41293230	41295265	13	13	12	11	11	21	16	16	13	7	18	10	9	9	15	4	23	15	59	25	43	12	3	15	8	9	43	50	10	16	6	5	10	18	10	6	15	10	6	11	18	13	15	18	5	19
chr1_41342310_hg38	chr1	41341165	41343454	15	28	54	24	26	36	40	31	32	21	21	32	18	19	31	43	56	42	79	56	51	39	10	41	16	21	55	58	28	28	36	25	23	26	16	15	30	21	16	27	22	25	34	31	15	47
chr1_41367916_hg38	chr1	41360866	41374966	516	353	868	959	384	1411	1125	379	1483	1284	1238	1154	1296	984	1313	888	368	1024	347	154	167	566	219	968	346	447	194	196	428	427	557	321	543	358	410	388	649	434	490	510	349	363	595	654	390	1062
chr1_41454968_hg38	chr1	41453053	41456882	54	70	177	128	125	245	129	82	298	188	220	312	126	149	320	107	70	228	86	79	82	58	68	169	73	86	64	40	91	81	148	62	125	59	83	62	109	78	127	122	56	73	153	139	83	332
chr1_41475618_hg38	chr1	41473970	41477267	89	69	117	77	28	106	87	33	114	171	125	167	87	64	104	133	57	116	120	105	95	100	50	135	34	63	55	74	111	72	85	71	71	62	40	38	86	75	46	60	45	42	86	45	30	77
chr1_41483491_hg38	chr1	41481261	41485721	146	67	189	122	33	125	103	45	145	138	108	148	126	76	107	135	78	136	184	176	86	77	30	134	42	89	72	91	98	52	98	63	49	61	46	48	81	52	55	60	36	50	85	46	21	75
chr1_41498256_hg38	chr1	41494331	41502182	437	269	841	352	144	461	383	143	541	608	413	473	451	242	474	501	228	581	284	345	173	357	128	486	118	192	145	117	280	288	247	184	199	195	146	153	235	187	149	184	175	164	262	111	76	174
chr1_41507838_hg38	chr1	41506810	41508866	79	39	133	67	20	94	42	25	59	109	75	95	66	41	70	117	48	143	38	38	36	74	31	133	22	28	34	17	78	72	61	53	64	40	27	27	68	46	46	48	39	33	72	46	17	37
chr1_41515202_hg38	chr1	41512621	41517782	164	145	473	229	112	562	264	153	524	323	410	503	237	217	487	242	129	465	147	94	41	173	66	376	124	174	115	77	199	205	257	133	189	133	145	115	206	161	200	206	178	173	252	195	103	342
chr1_41575339_hg38	chr1	41572981	41577697	125	166	247	122	82	224	122	63	177	189	188	224	85	123	152	138	100	206	93	85	67	118	67	212	74	66	72	57	140	97	120	68	86	71	66	58	92	74	81	103	72	91	121	132	92	202
chr1_41618938_hg38	chr1	41616552	41621324	105	121	217	165	180	315	201	104	332	256	347	436	92	175	253	159	159	290	205	212	115	78	64	222	112	121	164	102	186	102	233	97	171	99	126	84	144	114	163	140	63	104	169	197	129	362
chr1_41662841_hg38	chr1	41660631	41665051	194	121	442	235	117	502	304	84	357	418	354	451	310	123	423	309	132	383	296	152	82	201	57	379	113	124	98	90	214	205	230	142	214	122	161	96	188	161	178	190	79	80	139	117	74	209
chr1_41671564_hg38	chr1	41669808	41673321	149	146	258	62	35	83	113	87	148	88	75	75	84	69	145	158	151	231	65	60	84	179	79	335	19	29	16	16	88	68	59	42	68	48	32	15	29	15	15	21	138	138	184	67	40	92
chr1_41689733_hg38	chr1	41688270	41691196	65	74	114	77	72	121	105	64	117	122	130	150	85	73	82	96	44	93	38	27	30	75	31	97	21	39	30	24	63	50	60	36	36	41	28	16	39	37	30	33	33	42	90	50	21	65
chr1_41714060_hg38	chr1	41710291	41717828	321	278	556	259	118	328	369	191	344	486	346	428	297	229	371	311	123	392	420	360	279	380	125	473	101	152	169	120	334	257	235	159	190	232	155	109	258	155	141	146	308	356	527	315	219	731
chr1_41727988_hg38	chr1	41726195	41729781	122	113	269	91	65	137	108	100	151	181	195	164	92	98	122	153	147	153	108	146	92	121	49	176	44	108	62	36	151	121	127	98	121	115	72	55	89	81	69	90	73	91	148	93	76	229
chr1_41767384_hg38	chr1	41766257	41768512	40	104	98	42	55	93	53	50	91	50	91	127	42	59	81	53	61	108	34	24	48	41	33	67	39	43	25	26	75	48	96	38	65	40	39	35	65	41	55	46	12	29	42	35	13	76
chr1_41788270_hg38	chr1	41787272	41789269	33	27	34	33	23	44	29	11	42	32	34	43	10	19	28	42	6	41	25	23	17	28	15	28	16	19	64	24	33	26	26	26	25	30	9	17	35	29	14	27	7	16	40	21	11	55
chr1_41802020_hg38	chr1	41799384	41804657	97	108	159	91	71	129	150	89	124	168	214	221	101	120	127	180	109	169	415	340	231	124	76	131	56	80	144	165	97	88	114	87	96	95	56	76	125	109	79	88	92	104	156	106	69	195
chr1_41861018_hg38	chr1	41858156	41863881	72	158	210	52	104	107	108	62	80	68	131	144	69	62	84	83	93	161	487	246	208	115	51	170	41	51	185	220	112	95	94	58	74	80	44	30	94	76	60	83	113	112	150	77	80	180
chr1_41866302_hg38	chr1	41865273	41867330	49	47	64	49	42	65	43	31	33	52	75	60	46	26	29	56	32	61	75	73	82	45	20	42	17	27	51	27	36	45	53	28	38	29	14	20	41	30	18	30	27	27	56	39	21	65
chr1_41875174_hg38	chr1	41873949	41876399	58	52	106	48	29	65	43	31	41	127	71	114	49	66	42	81	49	92	199	138	76	79	27	83	27	32	75	89	90	69	63	44	43	69	18	28	58	35	29	45	49	63	109	59	29	102
chr1_41918134_hg38	chr1	41915040	41921227	193	334	688	217	161	256	302	172	352	253	341	370	231	184	295	254	197	500	878	610	241	263	79	467	111	149	454	338	351	306	264	138	210	139	144	93	234	155	149	150	407	256	321	218	118	382
chr1_41955690_hg38	chr1	41954697	41956684	11	28	46	7	18	44	16	31	18	12	21	43	9	13	25	6	15	28	7	10	12	13	16	16	14	16	8	15	32	18	23	12	23	15	11	10	49	10	14	14	12	13	20	19	17	28
chr1_41977160_hg38	chr1	41976158	41978161	26	47	36	5	14	21	14	8	9	11	13	11	6	9	15	13	21	21	26	29	24	9	3	25	6	5	21	11	46	19	14	11	15	17	7	11	21	12	9	10	6	13	16	15	5	7
chr1_41981478_hg38	chr1	41980157	41982800	46	74	105	18	16	19	30	19	21	6	23	28	16	20	14	32	19	50	15	8	21	34	12	53	9	20	21	21	70	52	26	21	19	34	14	9	14	15	7	18	18	6	32	12	9	44
chr1_42001304_hg38	chr1	41999330	42003277	48	128	137	10	26	35	31	28	25	26	27	31	15	37	17	58	33	66	116	79	84	61	38	65	11	14	49	54	69	38	21	24	23	26	7	21	23	17	12	8	39	28	61	33	12	48
chr1_42014234_hg38	chr1	42012984	42015485	22	60	65	36	80	126	97	52	56	41	101	110	42	28	98	42	34	74	34	5	19	37	29	46	20	28	23	14	25	35	39	29	30	19	12	11	64	37	30	39	16	15	29	39	24	63
chr1_42035735_hg38	chr1	42033965	42037505	98	75	296	197	61	223	245	66	217	239	217	255	223	60	210	226	21	229	327	79	48	156	25	179	55	89	66	49	98	107	94	73	72	63	90	71	102	70	77	73	111	80	125	145	69	245
chr1_42146374_hg38	chr1	42144936	42147811	45	38	96	46	13	60	26	6	26	30	31	25	32	15	37	45	6	64	24	15	16	47	11	68	18	24	15	28	63	52	45	21	43	38	7	19	27	26	30	32	25	22	31	24	12	59
chr1_42175650_hg38	chr1	42170088	42181213	170	204	336	213	188	331	455	203	283	195	281	251	280	216	296	281	214	316	183	152	126	228	82	305	88	164	112	119	220	223	195	131	148	125	104	125	225	130	138	185	159	197	297	249	169	458
chr1_42241558_hg38	chr1	42240429	42242686	4	30	17	24	11	45	28	16	34	28	36	24	26	34	18	22	13	24	31	12	12	21	7	32	10	20	29	8	16	18	19	27	29	20	16	19	33	43	26	32	13	12	17	18	11	49
chr1_42258844_hg38	chr1	42256028	42261661	27	250	102	118	250	178	523	189	191	154	253	196	202	179	149	111	134	177	50	22	19	132	71	161	75	65	36	20	56	77	130	69	131	48	102	68	126	77	99	135	82	135	150	268	180	402
chr1_42266886_hg38	chr1	42265617	42268155	3	38	16	13	27	36	92	27	41	18	37	38	31	16	35	21	18	29	9	2	8	33	15	26	27	23	27	15	27	23	28	22	41	24	27	22	48	38	29	28	20	31	29	36	43	76
chr1_42282224_hg38	chr1	42280740	42283709	10	47	29	24	43	25	102	43	37	18	31	33	37	44	47	26	6	25	113	97	61	19	11	24	27	27	48	33	26	21	27	21	23	20	18	25	43	24	29	42	16	27	38	52	44	92
chr1_42307095_hg38	chr1	42306095	42308095	9	21	29	26	26	28	48	25	36	27	30	18	28	24	26	14	4	27	13	14	12	24	11	21	24	29	8	9	23	9	42	22	33	17	19	19	43	43	17	35	15	22	23	35	17	31
chr1_42312908_hg38	chr1	42311908	42313908	17	32	20	17	18	39	46	19	35	8	22	30	27	20	16	20	17	24	40	31	20	25	6	14	23	26	20	19	23	20	27	15	33	24	18	23	44	27	29	62	6	17	10	25	9	24
chr1_42320136_hg38	chr1	42318025	42322248	33	117	117	50	93	104	251	140	133	42	87	108	130	121	106	102	49	101	38	14	25	91	30	123	73	64	22	19	72	71	114	52	136	42	68	53	132	64	106	108	37	44	38	50	17	62
chr1_42329398_hg38	chr1	42328289	42330508	7	23	28	38	28	30	65	21	18	30	20	29	43	30	24	14	5	23	7	11	8	19	5	6	27	32	13	5	23	34	53	28	46	19	32	31	49	50	64	54	10	17	27	40	20	51
chr1_42335216_hg38	chr1	42333278	42337155	155	151	581	237	72	410	336	95	460	314	439	369	291	106	480	297	118	409	698	211	82	269	41	377	148	157	155	96	222	246	260	170	369	124	271	158	231	144	250	191	99	113	118	194	109	301
chr1_42380760_hg38	chr1	42378969	42382552	105	89	306	67	35	89	165	44	142	138	153	136	131	81	122	138	40	153	513	192	71	111	19	168	55	75	108	80	114	153	78	75	80	71	84	65	69	68	65	84	122	74	96	64	32	121
chr1_42420514_hg38	chr1	42418654	42422375	72	161	241	50	53	83	110	69	83	38	62	77	55	66	132	77	106	166	81	27	52	101	55	169	16	49	41	36	89	78	59	54	35	36	37	30	52	46	31	39	140	75	104	52	32	83
chr1_42456455_hg38	chr1	42454499	42458411	207	165	668	264	96	362	362	115	455	458	433	376	434	201	537	377	130	452	676	217	81	290	46	450	80	177	198	146	190	282	193	159	214	135	156	112	192	158	140	178	290	229	282	334	162	479
chr1_42463513_hg38	chr1	42462104	42464922	42	64	193	68	30	65	140	56	97	105	66	82	79	62	109	81	64	108	127	44	39	99	30	104	46	61	51	42	82	70	76	41	48	50	44	34	51	42	50	40	150	91	146	175	80	288
chr1_42658163_hg38	chr1	42656494	42659832	94	79	249	143	55	143	165	72	174	221	209	202	184	131	217	146	92	177	299	84	57	138	31	138	55	66	46	47	85	101	109	51	66	54	85	51	96	65	91	83	102	83	118	115	81	202
chr1_42674514_hg38	chr1	42673401	42675628	4	15	13	8	27	28	34	42	19	5	21	32	10	12	17	11	9	14	18	9	6	9	17	15	62	51	44	34	56	47	88	22	72	32	49	35	48	43	67	79	28	22	38	46	23	89
chr1_42681788_hg38	chr1	42678860	42684716	114	191	487	154	107	318	370	108	307	261	378	299	275	153	377	267	137	324	488	115	74	281	72	329	106	139	128	103	175	157	219	114	186	111	177	98	188	130	171	195	151	123	160	176	108	339
chr1_42741166_hg38	chr1	42738194	42744137	162	109	147	269	84	267	245	89	283	314	231	241	262	165	235	188	126	201	53	38	28	103	53	181	124	180	59	52	171	180	225	116	169	132	138	147	222	157	159	218	125	153	225	233	140	526
chr1_42746896_hg38	chr1	42745800	42747991	28	29	57	55	27	63	50	55	58	43	57	66	46	49	56	34	31	53	68	51	18	35	12	67	32	55	73	71	57	61	73	35	64	56	51	34	62	49	61	75	22	28	30	47	22	69
chr1_42762783_hg38	chr1	42761785	42763781	23	16	32	30	30	46	30	25	27	33	37	32	34	32	26	29	6	29	23	16	9	12	5	26	22	34	21	11	25	24	34	29	28	22	18	13	44	34	27	51	4	9	21	15	8	25
chr1_42766617_hg38	chr1	42764160	42769074	209	100	538	347	75	332	415	84	455	455	405	428	405	153	482	392	68	410	746	121	89	301	44	422	80	98	108	73	136	153	153	112	161	70	147	76	98	99	114	104	221	160	190	203	100	346
chr1_42785344_hg38	chr1	42784038	42786649	92	47	168	128	35	149	171	58	131	199	151	130	117	64	129	155	59	143	46	32	26	108	51	139	49	74	50	38	69	84	96	68	56	80	62	55	106	63	58	73	34	22	30	46	24	88
chr1_42838207_hg38	chr1	42837139	42839275	10	44	44	16	42	49	75	42	52	28	82	67	20	43	55	29	26	53	18	6	4	40	17	35	6	19	12	17	21	11	23	18	24	15	10	12	23	22	17	14	19	14	38	32	18	57
chr1_42931286_hg38	chr1	42928898	42933675	152	130	335	263	122	384	249	148	351	398	456	351	271	194	339	294	135	367	154	122	49	163	62	289	155	201	151	83	217	272	312	169	250	168	187	172	274	267	265	332	168	171	298	433	188	713
chr1_42936699_hg38	chr1	42933889	42939509	235	196	498	262	153	328	281	193	347	407	484	392	296	309	391	289	137	372	133	91	66	194	114	354	162	251	169	92	259	285	292	220	256	203	183	186	355	318	214	356	185	185	229	328	165	585
chr1_42944870_hg38	chr1	42940493	42949247	365	393	890	396	264	800	477	325	652	436	609	728	460	406	705	513	246	705	830	309	270	360	141	674	214	339	236	96	301	327	346	271	367	293	250	220	437	386	243	446	182	178	262	254	132	530
chr1_42958006_hg38	chr1	42951588	42964423	510	647	1601	849	666	1529	1128	576	1914	1088	1800	1762	1084	1072	1768	969	672	1456	801	317	251	679	303	1421	476	593	369	202	721	742	967	568	962	491	636	502	890	679	803	866	482	438	657	788	424	1526
chr1_43035842_hg38	chr1	43033974	43037710	44	76	133	83	79	161	134	107	207	107	193	147	115	159	193	74	56	146	19	17	23	66	46	156	67	109	53	29	81	97	132	83	128	87	89	80	120	106	108	127	76	105	111	162	103	329
chr1_43058677_hg38	chr1	43057392	43059962	21	61	93	28	32	70	63	88	62	32	103	57	41	60	69	45	50	96	19	8	12	42	22	87	25	45	24	17	36	50	55	32	32	55	32	20	53	42	25	36	69	65	82	61	45	99
chr1_43070458_hg38	chr1	43066086	43074830	197	228	446	270	202	511	344	264	524	398	585	586	361	442	538	325	225	488	118	70	76	219	117	398	119	209	138	100	189	198	222	184	148	160	126	137	291	200	131	213	187	230	288	292	167	490
chr1_43171980_hg38	chr1	43170793	43173168	51	25	121	96	18	62	108	27	94	123	64	72	87	35	83	89	4	83	128	33	20	73	16	56	13	12	23	17	19	27	22	17	14	22	16	10	27	31	16	20	32	37	40	88	47	117
chr1_43234968_hg38	chr1	43229358	43240577	281	545	645	367	440	487	556	318	626	365	530	598	418	541	600	399	292	565	1090	779	541	353	198	535	270	298	214	135	360	317	455	204	394	234	276	215	444	277	341	423	335	344	511	481	337	995
chr1_43272778_hg38	chr1	43269296	43276261	318	336	559	768	403	1084	735	287	1385	838	972	1034	839	781	1164	643	442	811	74	54	58	291	156	599	303	293	115	59	281	318	490	229	574	169	336	303	499	307	440	549	223	252	484	941	499	1637
chr1_43282770_hg38	chr1	43281477	43284063	71	107	87	234	131	216	235	90	253	253	240	236	247	204	234	157	73	154	51	51	24	65	40	118	71	66	45	34	69	79	124	66	105	36	76	61	162	60	119	152	39	42	82	126	69	280
chr1_43296870_hg38	chr1	43287562	43306179	606	1203	1281	1204	1287	2007	2435	973	3036	1448	2217	2363	1909	2342	2514	1448	1092	1642	200	146	137	945	483	1601	614	750	210	158	605	645	1054	594	1047	412	737	670	1269	724	914	1063	470	625	966	1585	986	2971
chr1_43317402_hg38	chr1	43315646	43319159	140	176	270	271	169	426	328	171	611	338	411	446	385	434	450	288	225	304	105	79	144	128	92	294	144	143	56	49	132	129	226	119	214	94	154	151	268	117	212	234	63	98	175	253	154	575
chr1_43358434_hg38	chr1	43357239	43359629	77	78	166	145	58	145	185	57	175	170	182	157	177	110	166	144	33	142	224	71	41	113	30	130	80	68	34	59	67	78	116	68	161	51	102	60	119	63	118	96	109	91	110	143	91	243
chr1_43367353_hg38	chr1	43364901	43369805	359	211	788	568	147	1002	712	161	992	769	988	936	680	304	954	724	221	774	563	244	84	452	98	687	284	309	210	156	380	403	466	317	589	211	370	301	472	347	430	498	390	336	541	746	356	1294
chr1_43380604_hg38	chr1	43376067	43385141	250	678	727	340	682	891	1305	620	1459	406	1288	1227	557	789	1263	607	613	923	456	181	144	477	292	879	278	201	189	147	274	257	413	180	514	116	341	198	341	219	403	349	423	441	618	1165	647	1853
chr1_43389342_hg38	chr1	43387831	43390852	146	127	391	203	77	290	312	108	302	299	313	256	237	115	323	215	84	306	518	117	64	214	50	275	100	132	88	99	117	198	136	108	138	99	116	89	152	126	123	180	223	134	184	287	128	367
chr1_43437707_hg38	chr1	43436580	43438834	45	67	113	35	22	48	42	33	57	50	58	80	46	51	76	55	36	111	60	36	18	42	18	106	24	38	64	35	73	52	76	46	51	52	31	34	66	54	43	49	55	47	88	59	25	90
chr1_43451274_hg38	chr1	43447068	43455480	250	183	627	362	136	468	426	201	528	484	548	535	433	313	506	446	93	463	906	482	163	390	106	498	181	217	227	243	243	305	272	200	298	230	207	146	353	221	265	272	197	204	273	360	187	582
chr1_43536586_hg38	chr1	43535426	43537746	112	71	141	163	93	223	150	102	176	179	191	156	165	152	175	132	54	138	48	50	14	77	32	121	59	56	34	27	98	66	131	82	107	41	65	39	163	81	107	134	64	49	97	147	76	220
chr1_43547014_hg38	chr1	43538676	43555351	960	1181	1770	1731	1035	2316	1769	836	3069	2047	2596	2804	1878	1922	2595	1779	962	2072	297	243	183	1106	437	1957	841	561	320	204	949	799	1380	553	1513	539	864	410	1358	645	1172	1007	541	600	813	1986	1007	2886
chr1_43558646_hg38	chr1	43557174	43560118	170	119	214	256	87	267	198	71	270	355	258	240	264	121	294	216	59	259	30	39	15	142	46	249	98	72	33	31	147	130	136	80	175	98	109	44	129	69	111	135	99	76	117	100	36	163
chr1_43569544_hg38	chr1	43568367	43570720	100	89	168	255	81	262	123	58	195	182	154	228	167	88	143	159	58	183	31	60	36	92	27	150	94	52	36	26	133	61	161	75	153	72	107	61	128	96	158	182	45	48	89	98	49	183
chr1_43573282_hg38	chr1	43572107	43574456	107	82	146	202	89	195	152	70	232	226	230	216	203	136	204	170	58	160	159	63	28	83	23	159	87	82	61	57	103	89	140	80	121	67	80	49	127	107	118	130	49	56	58	95	49	157
chr1_43602334_hg38	chr1	43600827	43603840	67	42	106	196	92	209	92	48	204	174	172	158	157	100	163	142	53	144	45	23	7	74	38	146	93	65	65	47	80	82	173	70	142	76	104	50	157	94	141	146	41	51	81	213	76	279
chr1_43622055_hg38	chr1	43619632	43624478	209	178	515	112	27	100	101	48	122	82	125	79	78	60	109	206	95	234	449	357	110	188	65	292	43	60	209	209	160	214	94	100	134	96	66	48	89	70	62	95	208	152	173	78	53	116
chr1_43650299_hg38	chr1	43647898	43652700	186	181	466	197	104	232	323	124	433	270	390	364	261	207	396	287	80	337	693	212	113	249	50	303	128	147	170	129	232	214	227	165	259	128	191	120	213	141	205	187	223	146	208	291	141	520
chr1_43691073_hg38	chr1	43686610	43695536	351	529	724	166	211	392	591	343	496	333	444	431	407	422	560	415	219	418	195	83	77	333	149	467	86	210	166	133	410	291	211	194	237	195	187	107	271	159	118	172	310	161	223	130	75	244
chr1_43707582_hg38	chr1	43705880	43709284	127	72	456	166	41	191	230	80	255	241	217	209	193	77	268	206	42	259	541	110	50	134	25	225	54	85	100	84	153	132	123	82	97	80	103	69	111	92	86	90	135	102	157	151	98	269
chr1_43765458_hg38	chr1	43762801	43768115	45	80	114	60	84	181	212	90	175	52	112	133	106	91	184	72	77	119	42	48	47	68	47	112	45	57	39	35	81	57	82	52	38	61	39	44	93	47	62	81	84	83	100	122	67	180
chr1_43859530_hg38	chr1	43857253	43861807	148	155	207	54	28	65	122	67	107	107	84	90	96	79	123	102	72	139	56	17	32	94	45	139	28	60	108	108	138	109	60	55	68	76	32	31	70	44	26	37	50	75	74	67	31	90
chr1_43954952_hg38	chr1	43945161	43964744	914	1372	2731	1634	1399	3295	2829	994	5082	1930	3440	3804	2362	2386	4589	2232	1215	3079	1785	725	458	1281	594	2555	1069	1024	693	427	1176	1199	1745	850	2239	549	1220	999	1393	1011	1683	1605	1246	1172	1961	3451	1954	6065
chr1_44007344_hg38	chr1	44006278	44008409	38	49	100	92	72	256	87	58	178	149	209	214	105	158	199	80	55	113	17	38	15	45	23	100	77	104	32	20	78	93	137	96	125	53	83	72	139	106	91	139	40	38	94	136	83	287
chr1_44033044_hg38	chr1	44028529	44037559	381	375	1162	690	354	1245	734	379	1519	840	1349	1358	795	815	1438	704	306	989	499	291	132	512	166	884	317	316	150	91	414	348	638	325	665	265	432	316	607	347	513	444	315	282	555	666	373	1539
chr1_44047958_hg38	chr1	44046641	44049276	43	103	148	37	76	113	140	81	124	63	79	99	54	77	125	65	47	94	16	13	14	68	30	86	11	24	8	11	35	20	28	10	7	9	19	10	19	12	22	25	20	28	41	34	19	82
chr1_44219138_hg38	chr1	44216485	44221792	183	156	383	126	101	274	229	112	320	161	203	212	205	132	300	190	119	326	139	89	42	208	69	337	61	105	75	84	194	193	136	102	165	138	84	72	128	96	86	136	180	143	199	144	84	251
chr1_44240750_hg38	chr1	44237042	44244458	307	199	414	408	205	498	563	295	547	573	488	523	570	368	562	479	205	426	90	42	32	330	139	451	196	270	82	67	290	353	292	225	247	228	200	199	350	222	229	310	312	303	339	221	130	431
chr1_44251873_hg38	chr1	44249832	44253914	88	63	95	77	43	102	145	64	118	130	164	120	99	95	107	90	42	107	332	235	107	101	37	107	46	77	117	175	85	118	84	67	82	76	78	57	117	83	54	88	74	82	112	88	40	190
chr1_44271360_hg38	chr1	44269505	44273216	105	164	202	25	48	87	70	44	56	20	86	69	32	46	61	76	91	144	41	10	24	118	57	176	15	54	22	36	90	90	41	42	46	46	23	25	31	32	34	29	30	34	73	50	34	78
chr1_44275210_hg38	chr1	44273835	44276585	80	99	123	31	18	57	88	51	46	22	62	55	42	34	49	58	31	91	19	12	5	70	19	103	17	38	20	13	73	62	48	27	39	36	25	33	35	32	22	29	55	46	54	40	30	95
chr1_44294585_hg38	chr1	44293585	44295585	41	34	63	57	34	123	84	35	86	64	66	75	52	50	82	48	21	73	76	31	16	49	16	48	37	36	27	38	47	52	66	36	44	42	38	20	54	40	40	45	28	38	52	68	25	99
chr1_44316194_hg38	chr1	44314349	44318040	65	93	110	98	93	227	224	96	194	84	149	151	97	115	172	135	108	145	33	10	23	92	62	152	82	82	26	27	92	101	117	82	113	89	62	64	140	102	117	128	54	86	106	145	82	272
chr1_44332654_hg38	chr1	44331653	44333655	33	56	56	46	85	106	122	89	103	66	86	97	62	63	92	51	51	66	34	14	3	65	36	69	28	60	26	12	49	39	73	38	57	37	38	42	66	53	55	89	26	30	51	52	48	125
chr1_44346860_hg38	chr1	44343868	44349852	109	277	267	163	409	423	784	293	606	188	530	498	312	348	584	284	253	362	104	43	59	296	151	398	144	182	66	35	151	150	228	117	257	107	175	127	276	143	200	283	173	197	288	385	236	734
chr1_44355366_hg38	chr1	44353825	44356908	130	72	183	142	51	173	281	78	192	180	179	206	220	85	197	229	51	197	292	35	45	162	38	157	48	61	44	30	67	86	84	59	79	62	67	45	93	66	68	70	74	82	98	138	71	262
chr1_44379532_hg38	chr1	44377031	44382033	69	176	131	163	209	283	255	128	361	121	289	316	187	341	334	155	114	218	29	18	9	107	69	211	116	98	45	26	87	88	134	73	148	69	80	80	154	99	151	179	76	125	207	351	244	607
chr1_44417114_hg38	chr1	44415089	44419140	62	103	260	141	186	497	239	107	475	249	527	445	247	206	353	225	100	323	78	25	13	150	41	241	115	96	32	22	77	118	198	87	171	48	91	90	156	149	168	232	83	106	183	355	148	644
chr1_44423781_hg38	chr1	44420533	44427029	95	271	393	151	411	738	452	277	534	175	576	511	252	367	463	256	250	349	41	26	26	255	123	342	220	220	79	44	158	207	288	191	305	132	187	203	392	274	326	445	126	133	211	430	214	740
chr1_44485610_hg38	chr1	44484378	44486843	53	174	190	50	143	187	256	122	207	67	203	207	122	208	186	147	101	185	24	5	3	139	65	159	51	75	30	17	72	116	123	97	111	81	75	74	134	113	105	148	42	35	76	132	80	248
chr1_44496844_hg38	chr1	44495760	44497929	28	111	108	72	120	270	170	104	258	62	218	234	93	252	226	119	116	161	22	11	14	85	45	139	61	62	22	16	63	59	84	73	83	34	66	40	107	76	82	126	64	57	134	246	114	419
chr1_44500678_hg38	chr1	44498553	44502803	54	332	510	90	254	808	349	281	1079	134	959	907	213	450	957	248	332	583	45	36	21	199	135	500	270	221	108	31	190	255	408	172	645	108	302	223	370	212	429	356	202	196	351	641	343	1308
chr1_44507444_hg38	chr1	44503300	44511589	184	618	720	282	598	1384	730	471	2187	331	1493	1613	542	1109	1721	621	539	1121	147	76	63	445	250	913	442	334	155	95	352	349	750	263	892	153	549	330	666	353	730	565	310	298	641	1051	540	2132
chr1_44512854_hg38	chr1	44511666	44514043	48	147	141	95	149	289	219	132	409	121	332	336	169	285	375	143	130	244	34	29	22	93	52	206	110	101	52	33	116	97	218	85	278	41	127	133	213	103	181	235	87	96	175	356	223	654
chr1_44517089_hg38	chr1	44516070	44518108	25	88	98	60	119	150	160	91	239	53	197	217	78	153	220	86	116	153	18	5	8	66	58	113	64	49	22	12	42	40	90	33	84	15	57	32	70	45	79	95	58	48	86	168	116	326
chr1_44519624_hg38	chr1	44518577	44520671	32	112	112	61	122	169	157	121	324	64	250	271	115	232	288	125	113	206	8	17	16	65	60	185	74	66	16	11	50	49	87	43	113	27	67	50	112	54	86	81	57	58	96	217	127	400
chr1_44524494_hg38	chr1	44522231	44526756	126	309	456	260	403	675	483	269	1112	285	883	880	403	600	955	427	354	671	71	34	31	256	137	509	293	290	89	39	228	237	426	188	508	119	270	267	459	261	400	451	188	225	355	682	419	1240
chr1_44532676_hg38	chr1	44531112	44534239	54	264	261	72	298	387	344	216	758	95	580	550	175	384	567	226	296	411	33	13	18	198	88	375	189	138	52	29	132	123	266	98	386	58	164	157	252	117	302	233	135	151	236	525	334	881
chr1_44536434_hg38	chr1	44535287	44537582	53	135	130	95	198	288	229	134	354	119	302	301	202	374	287	175	117	188	13	23	5	105	67	168	89	84	40	16	74	64	147	58	156	29	89	71	173	95	156	121	72	86	169	282	153	552
chr1_44543260_hg38	chr1	44541390	44545129	139	268	311	226	300	624	404	230	894	304	665	709	367	553	759	352	315	500	47	37	24	199	139	399	201	196	66	48	167	224	345	155	340	97	236	212	342	209	317	341	144	177	340	569	311	1105
chr1_44559616_hg38	chr1	44558561	44560671	62	94	87	130	111	194	139	64	253	129	228	203	158	188	161	135	56	120	10	12	8	60	39	110	72	77	34	23	48	68	113	41	141	45	70	66	106	83	89	128	52	47	128	225	125	430
chr1_44566128_hg38	chr1	44564970	44567286	83	133	124	196	157	261	314	117	388	185	357	323	255	299	306	198	178	204	21	11	4	107	57	175	118	124	33	16	93	139	218	106	205	44	131	120	210	148	219	191	74	90	183	314	177	568
chr1_44570044_hg38	chr1	44568973	44571116	34	153	116	88	159	208	160	116	323	67	243	274	119	237	216	142	123	166	16	9	14	84	44	137	104	92	30	18	71	73	165	73	164	28	93	77	173	114	134	150	48	52	107	187	101	320
chr1_44591435_hg38	chr1	44586989	44595881	225	649	994	554	683	1640	821	533	2446	658	1908	2042	794	1317	2064	755	780	1394	99	66	36	424	301	1143	611	419	179	58	515	459	945	343	1111	222	670	383	667	444	907	712	368	396	784	1503	807	2768
chr1_44603210_hg38	chr1	44601828	44604591	58	93	111	161	181	301	184	93	259	157	353	279	157	214	249	141	116	169	32	15	5	91	38	151	120	116	35	19	101	108	197	89	161	69	108	128	172	129	177	228	41	66	112	231	99	399
chr1_44617596_hg38	chr1	44616222	44618970	91	95	187	178	134	390	203	94	283	229	315	279	234	188	277	164	94	213	23	14	25	81	59	151	99	135	41	21	119	136	182	121	158	72	117	123	211	144	147	203	36	46	102	175	100	309
chr1_44634614_hg38	chr1	44630063	44639165	329	311	762	345	306	696	504	280	633	469	777	640	482	404	685	473	265	535	895	429	239	398	120	531	214	364	247	185	368	429	450	352	396	325	323	296	521	406	335	570	352	241	391	568	270	986
chr1_44647182_hg38	chr1	44640594	44653769	663	713	1552	829	674	1724	1129	596	1751	968	1753	1494	1038	1197	1667	1118	722	1299	308	299	114	735	334	1298	544	643	242	175	712	844	967	604	1037	441	629	589	977	648	831	1094	521	384	662	1256	499	1788
chr1_44658108_hg38	chr1	44655080	44661135	177	226	343	359	291	634	423	224	614	349	512	546	417	454	520	346	231	393	50	31	33	237	106	393	155	177	69	42	198	216	325	133	308	112	175	162	272	192	263	300	92	85	138	266	118	423
chr1_44662366_hg38	chr1	44661138	44663595	58	86	81	129	75	160	168	74	185	185	172	188	158	172	159	125	103	132	24	29	43	79	52	106	47	57	29	29	54	60	117	42	107	47	54	46	123	63	72	70	26	22	46	52	35	134
chr1_44673002_hg38	chr1	44669845	44676160	298	258	565	360	185	550	551	196	609	411	530	559	524	362	564	492	248	509	636	116	176	428	132	454	161	178	63	79	208	224	294	138	268	139	202	159	269	166	250	272	210	177	295	310	147	550
chr1_44715274_hg38	chr1	44714140	44716408	33	32	47	26	32	66	76	31	75	20	66	72	44	41	61	38	15	71	43	9	12	33	19	52	15	18	22	18	27	27	21	25	16	15	19	15	21	20	29	39	15	18	22	37	10	55
chr1_44758004_hg38	chr1	44756999	44759010	21	8	25	22	16	25	30	23	21	15	21	18	21	14	31	24	7	25	10	8	3	18	19	30	26	26	17	8	29	29	39	20	27	18	25	29	71	29	40	39	4	8	13	23	8	23
chr1_44785370_hg38	chr1	44782731	44788008	223	107	331	278	86	278	315	93	312	422	231	269	347	170	314	244	36	268	1041	471	206	220	55	259	89	143	135	120	153	169	141	115	108	112	106	102	185	136	104	145	57	75	93	64	55	145
chr1_44842958_hg38	chr1	44841701	44844214	124	55	299	112	25	133	170	41	154	214	172	188	158	68	182	152	51	169	392	158	52	132	36	198	33	70	97	87	131	168	95	87	91	64	68	46	82	62	61	80	122	137	165	103	74	213
chr1_44848982_hg38	chr1	44846953	44851011	114	136	167	125	161	203	327	205	215	154	279	279	195	293	248	154	131	177	149	72	121	148	90	167	63	108	87	74	141	95	98	69	98	79	86	74	111	81	81	116	193	124	249	360	238	714
chr1_44884342_hg38	chr1	44882778	44885907	54	77	95	34	41	83	194	102	103	45	78	103	66	93	106	56	57	95	27	15	17	69	31	90	12	36	27	25	19	26	19	22	26	24	22	13	26	17	11	18	72	70	72	91	56	151
chr1_44903509_hg38	chr1	44902391	44904627	25	61	50	11	19	24	79	36	22	16	23	27	18	42	23	20	14	25	34	16	12	46	15	47	9	17	9	13	25	29	16	14	12	22	9	7	11	13	10	14	34	30	34	22	18	31
chr1_45001369_hg38	chr1	45000375	45002363	22	18	37	35	20	42	32	29	48	52	58	43	39	36	42	37	44	27	38	24	28	38	12	31	18	44	28	30	30	33	26	19	16	34	23	22	47	39	18	24	33	28	34	42	20	61
chr1_45014630_hg38	chr1	45008823	45020436	350	371	942	463	216	671	642	284	823	548	759	716	590	441	824	570	224	720	1152	399	296	481	138	738	209	290	321	302	377	434	400	273	343	273	277	223	358	247	312	349	333	268	439	565	271	878
chr1_45035270_hg38	chr1	45033315	45037226	16	16	20	14	15	18	32	38	24	12	32	26	29	23	19	21	32	19	242	131	98	11	11	26	8	22	68	71	27	14	26	12	17	25	19	12	12	14	10	24	31	31	34	31	15	45
chr1_45141252_hg38	chr1	45140250	45142253	13	19	14	14	23	29	64	34	34	18	34	29	22	32	28	19	20	31	16	8	5	19	10	38	21	16	7	10	18	13	21	5	15	7	9	13	34	13	19	28	25	13	20	25	5	20
chr1_45206243_hg38	chr1	45204191	45208295	128	140	486	174	60	369	384	137	341	257	391	306	273	146	411	266	86	311	498	201	83	242	50	353	129	170	252	145	228	228	226	140	285	162	213	117	183	164	218	149	174	158	169	238	101	380
chr1_45266230_hg38	chr1	45265095	45267364	28	48	73	17	41	69	60	37	74	30	57	55	41	60	66	24	28	63	9	8	6	32	25	54	34	57	18	7	36	67	48	34	71	35	44	47	74	56	69	80	48	16	30	103	22	76
chr1_45274950_hg38	chr1	45273612	45276287	19	100	57	75	92	123	172	76	134	66	120	109	61	109	130	70	83	96	15	6	6	61	39	82	38	22	10	11	32	29	51	32	53	21	30	41	78	31	32	60	14	7	14	41	9	29
chr1_45298116_hg38	chr1	45296473	45299760	78	102	66	114	100	147	173	96	128	109	145	145	135	119	127	94	79	94	37	45	43	58	48	120	65	89	37	40	81	82	100	55	95	65	79	52	161	78	79	110	99	133	215	397	179	588
chr1_45303430_hg38	chr1	45301158	45305703	197	141	457	310	76	333	323	116	392	465	397	412	411	209	405	346	61	359	605	216	129	281	47	340	113	140	129	92	171	181	157	126	153	107	120	108	153	116	146	140	173	163	240	301	161	491
chr1_45333943_hg38	chr1	45324879	45343007	454	339	962	602	296	925	895	333	952	805	971	893	732	516	954	747	318	847	2918	1705	867	583	159	793	241	389	458	388	433	487	454	366	453	338	320	266	431	274	314	370	466	328	504	553	284	923
chr1_45348030_hg38	chr1	45345771	45350289	115	97	140	81	87	159	219	113	178	83	199	202	104	107	157	126	102	149	779	192	166	126	59	168	80	119	190	179	111	116	126	97	120	100	92	68	147	88	89	144	112	119	113	133	68	221
chr1_45361018_hg38	chr1	45358693	45363344	72	165	155	126	195	296	276	122	212	121	228	233	179	198	201	142	95	185	58	47	37	148	78	171	110	88	33	29	89	104	137	73	122	66	94	81	127	94	122	138	121	75	127	195	91	283
chr1_45365022_hg38	chr1	45363912	45366132	16	46	44	54	93	90	107	45	68	35	89	96	51	55	82	52	36	57	31	7	12	48	22	58	32	38	11	6	31	27	41	33	34	25	26	27	58	44	38	58	69	43	75	107	52	191
chr1_45412647_hg38	chr1	45410818	45414476	17	83	39	42	127	108	105	57	73	66	86	104	71	67	76	45	85	61	27	32	20	41	30	63	37	38	21	29	26	25	52	40	39	30	20	29	89	47	41	74	78	68	115	227	112	298
chr1_45424296_hg38	chr1	45423268	45425324	8	21	27	13	58	35	67	31	33	16	31	33	33	44	28	19	21	28	4	11	7	22	7	26	16	19	9	8	22	13	31	9	23	12	21	16	36	27	20	34	21	22	25	56	29	69
chr1_45509970_hg38	chr1	45506463	45513478	193	266	276	267	258	477	567	234	394	315	455	344	360	459	380	352	194	303	184	121	69	260	118	278	133	204	128	125	197	222	268	174	273	170	156	181	338	222	214	380	235	235	390	690	406	1197
chr1_45551047_hg38	chr1	45549587	45552507	140	120	248	197	81	245	282	117	284	257	273	266	221	143	303	206	115	277	346	103	70	170	53	250	52	95	78	64	122	124	152	79	110	81	79	70	130	79	95	104	119	98	162	239	128	410
chr1_45568536_hg38	chr1	45565992	45571080	107	96	169	89	97	229	170	86	151	84	188	184	102	123	144	109	94	128	163	71	68	103	54	141	55	66	81	77	123	102	119	86	97	96	72	50	157	84	92	137	89	75	144	180	90	317
chr1_45584126_hg38	chr1	45582902	45585350	138	50	201	198	29	107	203	38	216	275	245	217	194	55	201	223	19	179	507	46	23	175	12	169	40	50	31	38	60	93	92	68	91	52	57	49	61	56	54	79	138	107	136	212	95	364
chr1_45630032_hg38	chr1	45627256	45632809	82	160	112	143	204	233	340	117	203	121	213	170	225	173	171	198	86	166	46	30	18	126	78	147	39	45	45	45	46	69	57	48	50	45	33	33	77	67	47	94	62	45	65	96	38	144
chr1_45679393_hg38	chr1	45678393	45680393	30	50	56	39	49	69	109	61	53	40	55	45	71	59	57	66	28	43	35	10	23	42	25	32	27	38	20	13	28	37	37	28	31	27	29	24	41	28	23	46	30	32	26	41	18	71
chr1_45687244_hg38	chr1	45684826	45689662	199	345	872	242	155	552	457	251	669	335	835	634	324	324	775	352	233	629	704	221	117	435	115	605	182	237	193	131	270	351	398	195	446	175	294	175	288	185	307	222	330	233	293	428	210	613
chr1_45718592_hg38	chr1	45717592	45719593	7	9	14	8	17	15	29	19	13	6	14	13	9	27	15	5	8	13	63	102	25	13	3	7	6	3	45	17	6	11	18	9	12	11	6	3	14	10	10	6	3	3	6	10	2	9
chr1_45750044_hg38	chr1	45747530	45752558	253	193	611	278	133	409	447	180	429	411	480	428	376	268	521	357	137	398	628	343	142	319	97	403	92	183	185	127	180	252	163	132	185	126	168	97	154	128	123	155	225	179	257	273	127	379
chr1_45803426_hg38	chr1	45801339	45805514	76	55	242	105	75	219	142	71	134	118	179	141	108	119	147	116	67	149	175	77	67	114	49	124	61	95	99	88	95	108	88	77	99	85	78	58	118	64	71	80	61	56	74	70	39	124
chr1_45864286_hg38	chr1	45862614	45865957	13	73	86	21	112	101	128	89	67	25	92	65	25	32	62	26	40	83	36	29	41	60	48	94	28	37	25	23	55	42	50	34	40	31	39	28	70	55	46	63	61	56	51	47	41	68
chr1_45867884_hg38	chr1	45866887	45868880	4	23	21	12	18	31	38	28	25	9	28	28	12	16	16	17	5	41	18	6	7	31	19	26	13	7	10	8	31	21	33	16	11	14	10	10	26	21	6	24	21	18	16	27	17	27
chr1_45892622_hg38	chr1	45891619	45893624	14	24	28	6	34	39	69	43	22	9	24	36	25	17	23	13	23	27	8	9	8	25	15	32	4	15	10	9	18	17	24	10	13	11	7	11	26	37	8	13	20	18	16	25	14	40
chr1_45913979_hg38	chr1	45912431	45915527	18	42	67	28	88	98	129	69	68	30	52	86	53	54	73	48	38	42	33	9	16	52	29	44	25	49	27	14	40	27	42	23	39	27	24	29	64	30	27	26	47	65	60	75	70	127
chr1_45956528_hg38	chr1	45955483	45957572	13	35	18	13	42	30	48	51	19	11	41	31	23	23	19	28	6	26	11	5	9	25	14	21	16	14	10	11	11	19	19	17	14	12	13	14	15	14	17	25	20	21	43	68	51	107
chr1_46037128_hg38	chr1	46029445	46044810	263	296	513	203	227	459	356	265	342	307	413	412	232	292	330	389	235	403	1222	777	491	312	135	423	101	178	341	295	272	258	221	147	187	210	110	101	188	156	129	165	204	222	307	343	197	544
chr1_46109234_hg38	chr1	46107603	46110866	17	110	100	11	20	21	35	19	12	12	17	15	11	15	14	24	37	45	87	98	64	29	11	68	9	11	27	17	42	34	23	11	14	30	2	8	17	9	4	10	10	13	17	17	11	19
chr1_46114738_hg38	chr1	46113499	46115977	14	102	79	6	23	26	62	23	20	7	13	24	12	17	15	21	27	58	124	47	47	43	11	50	2	24	21	25	46	28	18	12	22	22	14	8	20	13	7	6	13	8	14	5	7	15
chr1_46134896_hg38	chr1	46131073	46138720	176	284	779	211	132	443	413	202	465	256	473	422	289	195	465	284	184	543	2033	1109	402	389	83	527	145	238	651	500	345	359	321	214	309	209	218	153	266	214	186	272	389	297	329	321	183	559
chr1_46171837_hg38	chr1	46165893	46177781	485	624	1362	231	125	363	475	325	535	332	530	447	447	435	662	575	472	822	3417	2129	1113	572	204	913	134	226	1124	966	582	569	336	284	331	327	198	154	258	240	130	201	759	616	740	334	239	604
chr1_46180480_hg38	chr1	46179439	46181521	62	96	138	95	83	253	101	57	158	75	122	167	79	67	119	82	56	138	102	95	92	65	30	103	36	34	32	19	75	46	85	25	45	46	31	26	68	30	49	62	83	66	101	67	44	150
chr1_46184136_hg38	chr1	46181938	46186335	156	160	289	232	147	280	250	176	296	166	211	243	180	182	343	203	119	214	261	92	183	141	106	186	61	103	101	101	136	110	117	75	122	104	88	56	121	102	94	103	72	86	136	113	64	243
chr1_46198380_hg38	chr1	46196795	46199965	200	149	399	308	114	397	355	128	385	408	405	396	359	269	371	316	135	338	504	236	100	207	52	316	99	119	101	88	186	126	175	102	153	102	128	90	141	119	140	141	167	149	176	236	152	442
chr1_46204621_hg38	chr1	46201838	46207404	286	455	972	342	302	692	552	324	747	462	798	616	512	547	760	512	339	660	981	496	274	429	184	636	191	223	306	254	398	305	347	224	375	178	263	168	292	233	286	314	503	428	522	559	324	1175
chr1_46222478_hg38	chr1	46217815	46227142	315	561	607	452	641	1144	982	527	1160	450	1158	1114	611	849	984	598	603	813	321	219	179	390	248	720	260	256	211	151	357	287	456	207	476	184	298	193	361	278	384	429	426	358	607	734	403	1497
chr1_46279239_hg38	chr1	46276601	46281877	50	63	129	56	54	95	99	73	106	68	92	93	70	103	103	84	66	98	292	240	125	69	31	110	37	55	94	124	66	75	66	69	76	81	43	27	98	61	48	69	71	55	92	66	38	162
chr1_46286166_hg38	chr1	46284801	46287531	25	17	69	29	16	39	36	26	49	27	49	37	25	26	39	36	22	45	169	156	45	30	13	54	7	7	24	27	16	13	22	11	15	18	10	16	27	9	12	16	40	29	58	46	19	90
chr1_46302786_hg38	chr1	46300134	46305438	412	200	1053	479	110	898	682	163	760	779	1026	807	659	188	848	745	185	795	1282	312	119	541	107	808	266	500	344	297	402	711	500	529	557	431	377	445	519	416	387	499	397	343	449	477	264	777
chr1_46412310_hg38	chr1	46409385	46415235	152	137	291	311	135	476	238	99	335	370	331	334	318	165	307	249	83	302	80	59	25	162	60	311	157	156	88	73	185	211	241	183	224	175	136	144	302	185	205	321	110	137	273	297	272	833
chr1_46448416_hg38	chr1	46447332	46449501	67	23	73	51	6	78	59	28	37	81	46	44	74	18	47	43	35	61	32	27	14	48	21	58	21	35	20	13	56	40	28	30	29	57	30	18	37	33	22	35	86	65	95	46	40	116
chr1_46466780_hg38	chr1	46464912	46468648	124	59	149	167	39	129	213	54	124	211	118	119	179	45	123	130	52	139	356	139	78	104	30	105	56	83	69	42	77	110	84	55	68	79	57	52	58	61	56	71	42	72	102	66	57	158
chr1_46516818_hg38	chr1	46515163	46518473	32	24	48	68	59	148	63	21	42	58	62	65	62	31	59	60	11	45	27	16	5	27	19	38	64	54	31	21	79	44	109	52	75	42	52	38	113	70	79	124	15	23	29	29	14	53
chr1_46532666_hg38	chr1	46530228	46535103	171	93	303	127	28	131	190	59	166	182	127	133	190	74	203	167	69	174	370	190	118	143	33	235	51	79	71	86	134	140	90	75	94	122	81	58	75	67	67	71	84	72	121	69	37	117
chr1_46540933_hg38	chr1	46539916	46541950	65	48	138	12	8	16	42	19	21	19	20	17	38	17	41	50	31	60	15	8	7	52	21	67	10	20	14	10	57	62	21	17	23	24	10	11	18	11	8	14	72	32	40	15	9	23
chr1_46544078_hg38	chr1	46543031	46545126	66	27	105	39	11	29	55	15	22	60	47	40	61	19	33	49	38	58	15	11	6	40	14	72	18	34	23	14	71	71	41	20	29	58	34	24	19	23	17	26	23	25	40	21	7	32
chr1_46549802_hg38	chr1	46548337	46551267	120	99	196	29	27	61	108	58	104	68	70	64	110	72	135	100	53	149	28	16	8	128	32	177	26	74	23	26	118	136	55	42	72	78	60	22	46	33	34	32	57	30	73	28	14	59
chr1_46609394_hg38	chr1	46597607	46621181	782	881	1377	659	393	1042	1181	537	985	1097	1111	924	979	714	1009	1009	676	973	3321	1777	1181	978	321	961	328	454	564	540	580	547	682	407	554	448	431	318	717	451	439	523	545	461	717	729	343	1260
chr1_46624298_hg38	chr1	46623217	46625379	40	34	64	39	30	100	103	33	82	47	51	59	69	63	93	41	32	68	61	49	58	46	20	74	15	24	29	15	39	30	64	26	33	41	18	18	34	27	25	34	20	28	29	31	20	51
chr1_46643546_hg38	chr1	46642481	46644610	31	48	59	15	51	71	85	64	39	25	50	71	28	23	51	40	33	51	215	61	30	55	26	63	26	28	47	35	25	28	40	19	35	24	27	22	33	24	31	34	54	50	76	161	82	242
chr1_46668134_hg38	chr1	46666121	46670146	206	185	588	233	115	418	426	160	395	347	402	349	346	144	451	339	144	395	771	278	143	267	76	372	90	117	112	88	134	151	116	95	115	97	123	81	136	101	93	128	218	179	225	242	157	384
chr1_46718758_hg38	chr1	46716737	46720780	130	98	304	207	76	284	335	82	265	263	271	240	287	119	273	258	54	270	380	160	93	193	50	268	107	158	133	94	160	188	173	136	150	136	142	104	182	135	117	160	105	100	148	162	96	342
chr1_46724020_hg38	chr1	46723025	46725016	26	32	37	21	17	42	36	22	38	23	44	29	43	43	24	22	50	30	34	28	39	37	29	34	17	23	10	16	28	34	31	22	28	33	18	28	32	30	24	26	14	14	30	22	13	40
chr1_47024323_hg38	chr1	47022767	47025879	59	70	252	11	4	24	83	44	85	49	79	52	50	41	123	72	56	135	227	163	31	140	30	161	12	28	110	115	61	81	22	37	40	37	26	22	19	22	16	12	86	60	84	20	14	23
chr1_47175526_hg38	chr1	47174248	47176804	49	55	61	18	32	50	53	26	39	19	40	33	30	25	33	52	49	82	15	4	4	50	17	57	11	26	11	16	24	24	35	27	29	29	16	17	38	34	30	49	13	9	20	26	13	48
chr1_47178904_hg38	chr1	47177081	47180726	105	141	264	54	22	114	75	49	80	88	115	89	59	57	85	81	91	174	25	6	3	103	42	184	21	31	32	21	60	42	53	35	36	54	38	34	56	51	35	65	35	36	44	56	32	80
chr1_47212174_hg38	chr1	47210956	47213392	34	17	31	36	20	45	78	44	37	53	84	48	73	45	42	41	37	40	20	9	7	27	22	47	8	23	20	15	17	16	29	22	32	27	19	17	28	17	13	11	13	27	13	37	7	48
chr1_47230434_hg38	chr1	47223939	47236929	191	282	456	237	161	485	377	283	366	458	1030	475	395	298	467	454	444	511	145	69	60	361	213	455	111	277	129	73	176	253	218	275	278	268	229	193	303	225	171	104	177	172	201	217	97	333
chr1_47314440_hg38	chr1	47312987	47315894	49	54	86	69	19	69	81	39	74	101	91	58	89	76	72	71	51	62	70	36	22	66	17	82	24	31	15	12	26	43	33	30	29	29	29	24	54	31	30	49	46	37	46	61	41	105
chr1_47333470_hg38	chr1	47330928	47336013	212	196	609	267	98	390	445	111	432	421	506	397	390	180	487	357	182	396	861	263	115	275	68	411	66	99	125	95	147	179	140	131	200	111	143	90	135	110	120	110	178	168	180	215	106	330
chr1_47433689_hg38	chr1	47431720	47435658	48	22	75	72	35	116	62	32	66	112	110	84	64	44	64	55	11	52	38	21	11	92	18	53	29	44	27	24	45	67	62	36	52	61	42	39	48	41	55	48	17	25	47	40	23	61
chr1_47438468_hg38	chr1	47436007	47440928	66	13	205	93	7	130	104	26	134	118	176	159	133	33	181	85	9	130	49	13	4	137	27	146	37	64	41	38	71	97	84	56	57	91	60	50	85	62	70	67	6	9	23	16	3	23
chr1_47508304_hg38	chr1	47506929	47509680	45	15	67	60	14	71	83	25	51	92	72	53	102	26	65	62	13	60	28	6	7	74	18	59	20	37	22	12	40	48	54	39	26	37	35	27	38	41	32	37	29	17	35	22	17	49
chr1_47533848_hg38	chr1	47532085	47535610	96	50	116	76	40	97	158	58	105	172	153	132	94	61	110	115	35	113	24	16	17	118	44	111	76	87	30	24	91	109	134	82	96	76	67	62	131	77	84	114	63	47	78	59	36	85
chr1_47554359_hg38	chr1	47553169	47555549	22	15	32	44	35	57	31	24	20	45	40	41	22	30	19	44	2	25	10	3	3	31	18	29	32	39	28	17	41	31	73	24	46	25	39	18	57	42	59	69	14	4	15	24	11	21
chr1_47593349_hg38	chr1	47592219	47594479	33	10	42	49	6	30	56	14	21	86	30	32	47	13	31	45	6	35	14	4	2	34	10	29	35	48	18	14	45	54	41	22	53	36	32	23	67	49	39	52	52	33	40	28	20	59
chr1_47657180_hg38	chr1	47654801	47659558	68	62	124	46	26	71	181	94	87	96	146	112	75	99	137	109	69	112	36	10	12	127	45	149	16	44	43	39	43	32	48	24	38	41	28	18	36	28	22	25	41	48	56	42	24	58
chr1_47709753_hg38	chr1	47707826	47711680	76	29	205	118	9	93	131	28	136	148	141	143	148	37	194	154	25	149	72	22	8	137	18	161	36	64	69	18	79	77	60	43	56	81	46	29	57	54	56	64	46	32	62	54	27	72
chr1_47752231_hg38	chr1	47751230	47753232	13	7	20	9	8	14	23	11	12	29	20	32	18	11	21	13	3	12	63	34	26	21	9	23	3	15	39	58	11	18	12	9	11	10	9	10	12	13	6	9	8	17	23	20	8	28
chr1_47764752_hg38	chr1	47762003	47767501	38	17	48	32	25	49	48	31	47	53	58	54	53	35	45	29	65	51	151	148	83	33	23	43	21	45	138	133	38	42	51	25	33	40	23	28	42	31	26	32	22	40	48	33	15	78
chr1_47777680_hg38	chr1	47776269	47779091	42	38	94	26	7	30	21	24	13	22	20	15	23	30	19	30	13	42	24	10	15	35	19	51	4	31	31	27	79	78	28	37	36	47	21	11	18	23	13	34	10	19	26	22	11	36
chr1_47865187_hg38	chr1	47864187	47866187	4	3	6	9	6	11	13	7	6	8	12	8	8	9	14	7	9	10	8	2	3	5	4	11	5	5	41	36	5	15	8	3	8	14	4	5	10	2	6	7	3	6	8	11	3	20
chr1_47901834_hg38	chr1	47900689	47902978	6	10	7	16	16	12	12	9	9	5	20	13	10	17	14	8	12	8	58	16	23	14	10	8	8	12	67	50	18	6	13	8	11	14	10	10	11	10	8	9	4	7	9	13	6	29
chr1_47952016_hg38	chr1	47949803	47954228	98	150	117	301	248	340	328	141	323	261	359	286	309	338	271	174	217	160	38	20	15	71	88	139	100	108	39	39	101	78	153	69	159	64	135	91	184	90	153	192	41	51	176	259	115	577
chr1_47987840_hg38	chr1	47986838	47988841	19	24	44	29	14	29	44	19	16	26	27	38	28	35	25	14	16	29	31	23	32	20	17	24	17	38	44	37	23	38	27	26	16	34	26	25	40	28	17	15	12	25	27	21	14	39
chr1_47997190_hg38	chr1	47995473	47998908	58	23	113	174	55	212	144	38	130	163	168	126	163	54	102	89	27	91	44	11	16	78	26	94	44	72	40	30	62	58	77	58	58	48	60	42	72	76	53	68	19	19	33	38	17	113
chr1_48035306_hg38	chr1	48032547	48038065	63	123	68	157	192	154	272	117	186	112	145	134	170	154	175	115	118	114	30	17	9	73	69	99	45	57	38	29	49	42	73	49	67	49	41	36	64	45	63	86	30	31	36	24	15	47
chr1_48040764_hg38	chr1	48038616	48042913	57	66	66	174	146	150	188	87	163	126	127	107	135	149	150	97	104	104	16	10	18	66	45	101	48	46	42	34	55	54	87	31	57	39	52	33	63	48	42	73	27	38	48	25	15	56
chr1_48207508_hg38	chr1	48206504	48208511	9	11	11	21	9	26	13	11	12	10	14	11	14	19	10	14	1	17	10	3	9	14	3	12	13	18	33	23	11	14	23	19	17	16	10	7	21	16	6	14	8	8	4	10	8	27
chr1_48243183_hg38	chr1	48240939	48245427	45	57	63	48	91	84	147	72	108	77	136	83	71	70	101	86	64	86	29	8	5	74	28	68	22	64	12	26	33	45	57	33	43	46	31	37	87	38	44	73	13	26	31	27	13	55
chr1_48247126_hg38	chr1	48246142	48248109	20	20	22	19	11	33	61	25	28	20	28	25	17	32	25	26	17	31	4	4	6	27	17	25	7	24	26	10	14	12	9	15	18	22	11	11	34	12	13	15	17	21	31	20	19	34
chr1_48407358_hg38	chr1	48406362	48408355	1	9	9	16	22	16	33	15	26	10	15	22	12	16	17	12	8	13	4	2	3	13	13	10	6	17	8	6	11	4	25	10	20	8	10	7	20	14	11	29	12	14	20	36	16	34
chr1_48471338_hg38	chr1	48468911	48473764	163	298	496	213	226	428	561	232	638	310	578	596	368	351	586	338	166	495	81	36	19	342	109	479	170	178	76	60	174	184	264	137	332	117	193	150	236	175	269	200	200	166	221	410	177	587
chr1_48493548_hg38	chr1	48490015	48497081	137	373	343	192	425	464	615	324	684	232	646	552	370	544	599	345	349	438	67	22	30	214	215	424	176	193	65	39	149	168	279	141	270	103	198	160	276	155	249	259	97	129	125	256	154	388
chr1_48498564_hg38	chr1	48497398	48499730	15	46	50	39	50	70	97	64	103	51	69	97	70	106	86	56	56	73	8	6	2	38	27	47	17	27	10	10	20	24	41	11	25	26	25	16	29	17	24	32	35	42	34	81	35	72
chr1_48527117_hg38	chr1	48522676	48531558	92	409	290	169	407	393	693	362	824	225	525	602	312	453	646	256	341	417	72	23	27	226	181	360	75	77	40	48	83	64	124	50	118	63	61	66	117	85	92	131	44	57	51	101	60	112
chr1_48572984_hg38	chr1	48571920	48574047	15	44	59	27	22	19	42	39	29	17	47	46	49	16	34	38	38	51	14	3	12	27	30	40	7	13	11	11	38	28	24	18	25	15	12	9	19	15	23	24	31	25	25	25	9	29
chr1_48611096_hg38	chr1	48609146	48613047	103	146	114	74	125	129	236	85	131	145	196	194	164	119	158	135	109	155	37	8	16	164	88	148	68	103	24	24	95	80	119	61	104	54	44	52	105	96	82	101	23	41	44	25	17	34
chr1_48619928_hg38	chr1	48618923	48620934	12	12	15	15	8	29	38	20	18	36	36	62	22	11	12	18	24	14	11	4	8	18	13	27	11	26	13	11	12	20	13	9	11	20	10	12	30	35	13	10	8	10	10	4	7	15
chr1_48654921_hg38	chr1	48653876	48655966	33	14	15	32	19	26	52	6	35	15	24	19	50	32	24	28	19	26	12	9	2	22	18	28	12	21	11	11	15	12	24	14	19	18	22	7	26	12	16	17	9	14	21	19	15	32
chr1_48673056_hg38	chr1	48669762	48676349	102	122	179	127	116	144	278	134	178	117	135	155	146	137	140	130	127	160	47	16	15	116	57	119	19	55	37	26	64	65	52	43	49	47	27	22	43	35	38	45	21	28	69	37	33	84
chr1_48677781_hg38	chr1	48676413	48679149	62	67	101	55	35	67	74	37	81	82	55	84	89	66	58	76	48	109	28	16	7	47	31	85	12	24	38	37	35	36	29	18	41	35	23	17	31	25	23	26	34	38	51	36	22	46
chr1_48735768_hg38	chr1	48734667	48736870	29	67	117	4	18	22	33	20	23	19	12	24	18	12	18	29	37	75	14	3	2	35	18	75	5	10	9	10	34	20	16	10	18	17	7	7	7	11	7	8	72	48	58	37	20	21
chr1_48747640_hg38	chr1	48745814	48749465	47	98	140	27	38	63	64	57	70	36	65	83	48	36	54	60	67	94	19	1	5	77	37	110	52	48	23	20	101	80	92	49	86	55	40	39	74	54	70	77	66	82	93	69	52	113
chr1_48776814_hg38	chr1	48774723	48778906	182	189	442	233	99	234	396	106	223	365	264	255	341	180	287	316	175	304	113	92	43	270	105	329	75	135	77	64	161	173	162	112	147	100	117	106	134	97	113	155	122	122	177	121	86	232
chr1_48873732_hg38	chr1	48870509	48876956	84	265	404	16	18	27	71	50	36	17	39	36	34	24	44	100	214	208	33	5	10	173	92	247	20	31	24	23	118	153	67	72	78	87	10	20	24	34	18	29	271	174	166	52	26	43
chr1_48916154_hg38	chr1	48915014	48917295	33	77	74	9	14	19	50	24	20	10	32	40	12	14	31	21	20	66	9	4	4	57	24	82	9	21	9	19	49	31	29	21	25	13	14	7	15	7	15	7	52	38	48	20	11	17
chr1_48919025_hg38	chr1	48917536	48920514	58	165	117	9	16	14	29	55	16	24	29	34	12	11	21	48	74	73	5	2	4	61	29	82	4	12	20	17	70	53	33	16	31	28	19	6	15	13	9	13	106	70	70	20	10	18
chr1_48947951_hg38	chr1	48945750	48950152	42	198	193	10	17	36	40	22	22	16	28	15	15	16	26	48	94	104	23	7	13	96	48	131	15	22	38	24	80	68	38	34	43	36	8	14	28	18	16	6	70	71	79	29	17	23
chr1_48953496_hg38	chr1	48951852	48955139	41	138	114	2	15	13	14	23	4	2	7	10	5	5	3	26	69	68	7	4	1	48	38	100	7	14	12	20	51	27	21	20	28	27	0	6	11	5	9	7	46	38	34	11	9	9
chr1_49181350_hg38	chr1	49179698	49183003	16	111	98	2	9	15	35	17	13	12	11	23	21	6	17	25	84	81	10	9	5	52	29	92	4	7	15	14	41	42	20	21	26	28	5	9	20	8	6	12	88	52	44	23	4	11
chr1_49186332_hg38	chr1	49183973	49188692	20	202	188	6	26	34	115	52	28	18	34	36	21	13	23	42	74	108	27	8	8	125	49	149	5	22	24	19	81	61	44	25	45	40	12	13	14	16	9	20	173	94	101	29	22	42
chr1_49293192_hg38	chr1	49291074	49295310	79	83	166	15	8	15	48	22	12	17	13	11	21	13	13	64	31	89	23	3	4	66	35	109	8	14	28	18	76	61	42	29	56	25	9	9	8	12	7	20	138	102	99	23	7	25
chr1_49297621_hg38	chr1	49295859	49299383	21	118	148	10	13	19	55	39	15	11	21	29	17	11	13	31	53	81	17	4	9	62	28	122	5	11	30	28	70	53	23	20	49	16	11	12	18	13	8	13	129	84	83	29	21	33
chr1_50023788_hg38	chr1	50022127	50025450	82	132	311	51	28	43	109	73	64	95	117	100	99	29	107	88	41	143	37	24	30	126	34	174	22	65	45	43	112	103	51	41	55	56	47	29	45	36	36	51	105	75	75	40	26	68
chr1_50048236_hg38	chr1	50047080	50049391	41	37	115	15	8	16	39	7	17	27	38	27	23	13	21	78	30	71	20	2	5	39	12	94	4	28	11	15	37	29	17	17	27	38	6	9	22	12	3	4	47	36	48	31	13	24
chr1_50110426_hg38	chr1	50108554	50112299	51	303	537	16	47	72	74	56	41	28	138	87	30	35	39	74	95	278	319	65	59	185	53	263	5	28	184	120	155	151	55	72	85	77	31	18	40	16	19	13	306	181	164	67	43	102
chr1_50152019_hg38	chr1	50150953	50153085	12	102	90	4	12	19	30	19	11	7	20	12	10	10	10	23	32	35	13	3	5	38	26	34	2	13	18	20	42	28	18	10	17	22	5	5	12	12	6	7	72	32	38	18	7	23
chr1_50176793_hg38	chr1	50174803	50178783	65	173	212	17	14	26	36	16	12	23	38	22	11	23	12	58	82	107	19	14	14	111	41	123	8	16	28	25	77	67	39	35	39	49	17	11	16	18	14	8	139	76	87	48	22	21
chr1_50192402_hg38	chr1	50190661	50194143	53	87	127	8	13	22	38	23	13	12	19	22	14	10	12	45	39	88	23	16	11	92	22	72	5	14	13	27	70	53	28	23	31	39	15	5	8	18	10	8	95	59	73	22	15	20
chr1_50252063_hg38	chr1	50250986	50253140	24	24	25	12	6	31	28	14	19	22	43	31	17	15	17	37	27	35	11	3	9	43	14	59	11	16	17	18	26	21	19	14	17	31	8	5	19	18	7	12	20	25	25	22	12	24
chr1_50334413_hg38	chr1	50331053	50337773	182	391	644	39	19	63	105	59	100	86	109	82	86	86	138	170	120	299	46	14	11	233	92	390	24	49	54	40	239	201	111	98	128	120	59	32	44	29	26	45	360	257	235	95	56	133
chr1_50425588_hg38	chr1	50422134	50429043	59	17	73	240	71	332	85	27	34	109	65	39	80	31	31	50	22	66	51	14	12	44	10	52	42	48	53	36	79	63	90	37	81	67	50	46	49	48	68	102	69	97	85	123	108	293
chr1_50461388_hg38	chr1	50460323	50462452	9	29	22	25	71	55	63	41	45	13	37	43	18	40	31	19	3	20	6	2	5	22	15	18	19	19	8	8	13	11	35	13	21	9	10	21	19	11	22	26	6	17	18	22	24	44
chr1_50472798_hg38	chr1	50471792	50473804	7	21	18	9	39	46	33	21	16	11	17	29	12	12	18	15	22	21	16	1	4	19	14	23	13	16	20	14	18	17	40	19	19	19	23	17	30	18	18	30	23	19	34	38	34	76
chr1_50519599_hg38	chr1	50518191	50521007	21	33	15	62	61	68	74	47	30	29	36	36	48	44	21	23	48	44	13	14	5	27	13	31	16	11	5	9	16	15	25	14	27	7	10	11	18	12	24	29	21	9	21	21	18	19
chr1_50621136_hg38	chr1	50619994	50622278	38	33	33	72	49	69	67	31	106	66	71	102	71	92	66	54	70	51	9	4	5	31	22	64	47	33	18	6	54	35	61	24	50	33	39	33	56	37	65	61	35	43	62	95	53	142
chr1_50631107_hg38	chr1	50630081	50632133	8	32	22	35	59	30	88	39	55	29	37	49	47	60	28	23	29	33	3	4	3	18	8	23	7	16	7	5	15	9	14	9	16	5	12	11	17	8	16	28	18	29	21	68	46	77
chr1_50633622_hg38	chr1	50632486	50634757	7	109	39	21	119	72	177	93	94	51	78	79	50	33	77	26	52	47	20	6	8	55	35	58	45	30	15	12	30	33	53	28	61	21	33	28	60	40	47	64	50	72	59	145	99	201
chr1_50652044_hg38	chr1	50650998	50653091	11	54	23	31	93	44	135	74	49	27	55	41	48	101	46	32	14	41	13	8	9	27	12	46	16	20	7	7	24	20	44	5	25	11	17	7	39	18	32	42	18	24	21	53	32	70
chr1_50667282_hg38	chr1	50664991	50669572	56	217	105	121	224	156	439	243	192	145	299	180	165	260	147	111	188	134	36	15	75	126	76	128	81	65	30	21	74	64	133	49	154	47	75	50	134	59	134	125	66	75	110	183	116	290
chr1_50699265_hg38	chr1	50693946	50704584	65	511	213	180	655	462	963	435	562	283	468	431	379	397	437	229	248	362	56	38	33	225	129	316	168	146	63	33	136	137	266	111	329	66	169	137	237	143	274	200	245	298	274	913	478	808
chr1_50717427_hg38	chr1	50715934	50718920	24	122	55	61	118	87	189	71	126	59	94	97	124	138	93	72	51	76	22	10	12	31	22	69	30	29	20	14	22	30	51	19	43	18	27	19	43	30	54	64	20	30	36	61	33	99
chr1_50960006_hg38	chr1	50958314	50961699	124	107	278	150	79	263	259	91	225	240	231	172	258	133	237	194	94	228	426	156	98	170	50	203	72	73	73	39	107	130	117	83	131	78	87	94	92	80	97	110	105	102	123	142	85	220
chr1_50969050_hg38	chr1	50966581	50971520	122	229	838	187	141	834	396	188	702	287	661	585	319	264	578	270	137	584	564	254	51	299	78	647	208	218	222	135	323	335	370	206	480	157	302	158	300	172	396	263	227	218	264	475	232	711
chr1_50974114_hg38	chr1	50973090	50975139	13	43	47	16	76	36	55	48	71	29	38	42	43	117	52	21	14	39	6	12	11	35	24	62	13	11	3	11	26	30	28	9	24	16	30	13	28	24	28	33	25	16	21	50	25	49
chr1_50978444_hg38	chr1	50975803	50981085	136	243	738	174	184	720	342	246	714	290	562	541	283	284	615	266	117	529	292	176	55	276	82	524	140	152	91	53	159	177	188	112	219	93	157	123	156	113	231	154	191	230	238	425	235	639
chr1_51237696_hg38	chr1	51233865	51241527	247	462	981	267	275	871	679	324	659	431	747	655	428	336	757	505	310	650	886	309	193	455	188	659	186	225	171	141	320	322	327	202	341	180	205	147	277	196	223	254	301	248	350	484	221	765
chr1_51290207_hg38	chr1	51289206	51291208	57	70	86	9	8	31	21	37	26	19	21	25	30	20	25	39	15	43	31	14	21	26	22	38	12	14	44	22	59	35	23	27	23	19	13	11	22	21	13	17	11	18	25	29	23	96
chr1_51294361_hg38	chr1	51293213	51295509	37	34	54	48	33	79	59	29	68	57	55	64	51	65	49	26	22	49	17	20	12	34	16	46	44	30	8	9	65	39	41	39	28	32	30	26	54	34	40	44	48	57	124	186	150	435
chr1_51297170_hg38	chr1	51295688	51298651	148	95	225	161	63	221	142	61	183	195	170	191	151	133	175	157	93	143	122	76	49	113	42	169	43	59	46	26	112	106	90	48	69	51	67	55	92	54	70	97	32	47	84	113	78	284
chr1_51309258_hg38	chr1	51308215	51310302	9	11	16	12	10	11	24	15	16	20	16	16	25	26	15	16	2	20	9	4	5	7	4	14	20	29	11	10	49	25	33	17	31	19	29	26	20	28	45	45	4	5	18	14	6	36
chr1_51330360_hg38	chr1	51328179	51332541	165	149	381	107	39	134	190	77	150	170	151	124	204	131	227	158	50	209	63	27	29	117	28	193	36	84	49	33	126	102	95	79	63	61	55	58	92	63	78	84	27	38	62	55	25	102
chr1_51344108_hg38	chr1	51341747	51346470	65	30	88	160	65	164	107	33	91	154	70	83	114	73	88	46	16	78	48	15	15	49	27	64	48	66	45	35	65	62	76	59	61	59	54	51	96	76	63	89	23	28	60	87	47	154
chr1_51361599_hg38	chr1	51360537	51362661	8	22	30	14	41	51	61	33	24	10	17	20	35	19	39	12	10	24	9	6	8	23	7	18	15	17	5	11	10	12	17	10	14	13	8	9	15	11	10	16	15	7	10	22	13	22
chr1_51422670_hg38	chr1	51419869	51425471	51	287	343	34	118	118	261	146	176	56	144	146	103	75	184	90	134	205	330	106	64	172	49	215	54	59	97	113	122	86	116	72	80	60	56	46	113	59	74	92	273	166	134	185	81	173
chr1_51473194_hg38	chr1	51472196	51474193	6	47	30	10	45	44	95	62	44	26	44	35	34	25	48	15	24	25	12	8	10	42	15	50	8	16	11	11	16	15	17	15	14	21	13	16	38	17	16	28	36	21	27	72	33	53
chr1_51488907_hg38	chr1	51487907	51489907	15	21	40	16	31	73	70	36	46	25	46	60	26	31	63	17	15	42	6	2	6	34	21	40	19	23	9	11	19	13	32	30	38	24	18	18	49	27	29	32	16	13	18	34	13	29
chr1_51519408_hg38	chr1	51516929	51521888	173	337	549	231	249	750	409	249	682	380	667	684	345	326	637	338	238	518	231	141	95	300	133	483	180	188	140	86	234	228	317	176	391	142	225	153	272	178	346	220	93	132	176	328	144	480
chr1_51524654_hg38	chr1	51522458	51526849	44	231	169	98	249	318	522	238	363	143	360	300	201	235	361	139	188	234	43	8	16	168	85	227	90	75	33	37	93	99	132	48	174	42	97	73	153	72	131	114	93	92	169	310	167	510
chr1_51534564_hg38	chr1	51533169	51535960	47	145	105	69	134	212	287	123	204	81	195	204	152	180	229	86	99	148	21	9	21	112	70	140	55	45	19	17	52	47	93	40	80	23	72	32	69	50	80	57	76	62	107	225	138	340
chr1_51569382_hg38	chr1	51567811	51570953	39	96	94	47	105	128	176	118	160	64	128	140	89	145	147	48	70	81	23	4	16	66	40	68	14	20	14	12	15	19	32	15	29	19	12	10	36	26	17	23	56	36	67	144	62	231
chr1_51576398_hg38	chr1	51574271	51578525	50	123	71	125	174	141	289	176	178	103	175	180	166	321	192	91	104	96	30	27	16	80	49	89	42	35	15	17	32	31	57	18	42	25	40	23	68	50	32	65	31	21	62	119	46	196
chr1_51583812_hg38	chr1	51581564	51586059	74	188	142	169	186	233	454	189	317	179	273	316	259	364	321	167	134	180	38	11	13	136	70	166	46	66	33	20	42	44	73	36	76	45	55	42	96	46	76	98	52	46	97	165	80	268
chr1_51617052_hg38	chr1	51615414	51618690	125	98	236	139	69	286	266	90	240	219	252	261	273	171	260	176	113	219	288	139	99	173	42	221	60	72	56	55	88	100	121	60	115	67	70	58	103	56	94	74	114	77	112	184	57	288
chr1_51629814_hg38	chr1	51628814	51630815	11	35	23	24	45	55	72	39	53	32	45	46	21	62	37	24	21	39	3	7	4	26	22	29	17	13	10	8	13	14	35	14	29	15	18	5	21	19	39	35	11	9	15	22	4	44
chr1_51648417_hg38	chr1	51647333	51649501	11	45	50	41	63	86	87	42	64	29	66	72	45	62	50	42	24	49	36	13	14	49	17	45	23	33	31	35	40	29	42	24	24	33	20	28	36	27	28	49	25	31	28	51	27	63
chr1_51669482_hg38	chr1	51668154	51670811	26	47	73	31	65	76	126	52	86	32	68	81	30	43	92	45	52	79	64	10	18	53	22	79	33	28	63	35	49	65	64	29	16	43	36	18	53	36	40	46	69	76	103	167	83	209
chr1_51729524_hg38	chr1	51727926	51731121	105	51	210	88	46	96	172	80	138	174	150	131	176	91	147	138	44	111	108	62	36	107	18	113	42	83	54	25	83	109	84	64	84	70	62	64	107	81	45	62	87	90	114	113	67	217
chr1_51785385_hg38	chr1	51782499	51788271	79	139	162	51	106	168	267	129	176	66	161	157	108	78	180	126	77	183	76	17	22	158	72	184	46	66	60	66	104	80	89	74	88	89	61	56	97	76	68	92	111	75	94	134	60	159
chr1_51793068_hg38	chr1	51791415	51794720	47	79	106	27	63	102	173	106	88	33	100	81	61	52	98	82	119	96	67	19	12	88	50	124	22	51	43	48	60	60	58	47	57	63	33	30	78	41	43	51	66	56	71	69	31	97
chr1_51878652_hg38	chr1	51876685	51880619	194	213	546	241	114	353	406	148	383	389	431	338	340	237	423	297	144	390	826	237	122	327	85	345	88	120	133	114	154	200	175	117	147	103	131	101	129	92	116	118	270	180	260	264	136	421
chr1_51906299_hg38	chr1	51904597	51908001	20	66	74	55	90	149	107	77	132	39	115	98	60	84	107	43	50	94	18	5	8	39	47	83	29	48	23	28	55	53	64	30	49	32	30	27	63	28	59	52	9	10	23	21	8	31
chr1_52033583_hg38	chr1	52032053	52035113	132	84	287	134	32	181	219	60	191	279	233	153	189	84	209	185	58	210	434	125	46	153	36	209	69	95	96	65	134	148	107	88	139	95	96	71	95	68	81	86	143	113	153	157	78	208
chr1_52055866_hg38	chr1	52053462	52058270	189	165	614	248	143	421	506	160	527	347	501	448	357	221	568	366	106	497	712	166	81	317	70	467	140	134	130	106	217	228	242	154	283	119	208	135	229	158	219	195	286	206	328	434	171	617
chr1_52141672_hg38	chr1	52138307	52145038	203	320	802	205	71	401	378	169	419	287	441	403	319	159	465	308	110	468	945	526	149	356	79	564	59	91	217	162	144	156	99	83	118	104	79	41	106	71	67	50	276	184	236	152	99	267
chr1_52153581_hg38	chr1	52152581	52154581	35	55	68	13	25	40	67	41	31	18	25	31	24	15	29	36	37	36	25	9	14	45	17	52	8	12	17	13	18	19	21	16	24	39	10	16	29	12	13	12	38	26	42	15	8	34
chr1_52350256_hg38	chr1	52347801	52352710	90	153	198	128	151	315	266	142	192	83	222	174	177	215	207	129	76	172	61	63	27	158	56	183	61	78	60	41	96	90	107	78	98	81	56	59	128	74	91	120	85	77	107	97	84	165
chr1_52354232_hg38	chr1	52353227	52355236	28	76	60	25	30	47	51	26	37	20	40	34	32	41	53	46	21	66	40	29	18	33	21	42	15	32	28	35	43	49	29	17	38	27	16	15	49	14	17	30	36	41	59	40	13	53
chr1_52363106_hg38	chr1	52356183	52370028	404	289	893	452	184	750	590	250	604	579	664	592	547	359	669	535	227	669	1189	505	209	441	124	666	128	227	230	181	305	315	274	203	267	206	164	148	227	210	157	212	340	294	412	429	214	677
chr1_52404903_hg38	chr1	52403582	52406224	86	85	167	99	50	117	186	63	129	144	171	145	169	103	135	135	61	134	241	111	64	127	31	152	51	62	53	55	77	92	85	70	75	66	70	47	72	64	55	88	98	76	101	151	61	217
chr1_52553358_hg38	chr1	52550969	52555746	172	186	624	234	102	405	433	142	414	385	498	405	370	187	436	360	107	374	844	257	107	322	70	404	127	155	186	115	216	283	213	140	224	131	163	126	201	151	168	165	180	152	188	255	107	342
chr1_52603440_hg38	chr1	52600684	52606195	271	226	464	243	87	232	428	142	324	434	351	298	409	232	328	312	112	281	457	259	131	259	110	328	71	150	149	111	215	206	149	124	131	124	107	90	131	130	93	100	72	68	81	73	37	104
chr1_52629436_hg38	chr1	52628321	52630550	24	28	28	28	30	38	62	18	41	35	53	53	33	14	42	28	17	28	27	7	10	35	9	29	14	31	12	17	40	30	33	13	21	36	21	26	52	26	27	33	13	13	9	17	4	21
chr1_52632808_hg38	chr1	52631105	52634512	92	40	72	126	29	103	112	38	64	152	143	109	108	40	79	123	33	59	43	24	17	76	23	77	21	70	38	19	77	57	54	42	49	61	56	43	70	47	31	41	10	16	27	21	9	22
chr1_52637185_hg38	chr1	52636185	52638185	26	42	49	7	25	31	73	36	30	33	54	35	28	26	29	50	19	34	17	4	10	37	26	30	17	25	16	16	46	33	17	22	31	33	21	15	35	20	14	12	11	15	16	12	5	10
chr1_52663084_hg38	chr1	52661982	52664186	31	61	58	24	4	10	22	9	22	27	37	33	26	27	24	20	15	23	15	7	5	27	9	28	10	29	9	8	37	34	22	23	20	28	22	9	19	22	12	22	31	14	25	17	11	32
chr1_52686683_hg38	chr1	52685095	52688271	35	46	52	32	29	52	95	68	80	37	68	50	65	71	89	37	32	58	43	19	6	48	18	61	29	28	34	24	48	38	55	27	20	28	42	24	47	40	42	41	37	21	37	38	26	62
chr1_52726621_hg38	chr1	52724958	52728284	102	110	342	113	60	248	265	91	264	178	269	278	189	125	309	179	117	258	512	165	164	171	61	260	81	105	108	84	158	160	138	117	115	88	104	79	129	77	102	106	158	127	146	148	82	274
chr1_52752046_hg38	chr1	52750723	52753368	17	36	51	29	71	88	84	65	69	22	66	69	47	90	57	30	26	51	77	31	34	49	22	55	10	30	23	18	22	23	48	31	24	26	22	20	33	30	28	39	9	8	24	15	3	17
chr1_52905524_hg38	chr1	52904321	52906726	24	16	19	22	9	30	35	21	21	43	42	25	26	24	25	20	17	22	158	97	49	11	3	31	7	19	23	42	25	17	20	16	25	18	14	3	29	22	12	9	9	12	12	28	8	39
chr1_52915685_hg38	chr1	52913937	52917433	30	25	29	28	23	40	70	42	40	28	55	32	51	41	62	46	48	40	163	81	91	38	21	45	19	31	34	41	37	26	25	16	26	20	15	12	39	21	8	17	13	6	12	17	16	36
chr1_52927018_hg38	chr1	52924848	52929188	160	149	391	246	76	345	337	100	316	351	362	358	299	141	326	263	82	327	527	257	113	218	62	326	95	136	161	117	157	194	128	109	170	113	118	72	137	128	132	131	121	146	143	187	92	324
chr1_53015045_hg38	chr1	53013720	53016370	27	60	101	30	70	97	149	72	60	51	79	77	58	72	81	50	56	76	87	28	36	73	50	87	22	49	36	27	64	40	67	36	45	45	46	34	82	30	37	65	93	79	70	115	61	137
chr1_53025370_hg38	chr1	53024250	53026491	15	24	36	29	34	75	87	27	39	38	56	43	47	21	26	37	37	35	23	13	17	45	30	36	12	21	11	15	10	14	16	14	20	16	16	15	27	24	19	19	27	20	33	56	21	59
chr1_53049102_hg38	chr1	53047199	53051005	32	60	122	34	102	124	189	71	90	36	82	78	73	61	94	71	47	102	20	13	28	95	46	134	34	32	21	28	38	41	58	44	65	48	34	36	82	37	47	58	48	47	82	80	63	133
chr1_53062486_hg38	chr1	53060852	53064119	99	39	189	150	20	184	149	34	138	280	128	136	192	44	154	154	32	142	93	20	19	134	14	161	26	66	27	27	67	83	57	62	62	84	51	37	61	79	46	44	47	37	41	58	27	66
chr1_53074440_hg38	chr1	53073171	53075709	45	27	47	86	55	145	98	41	63	134	59	62	78	61	58	73	34	58	15	25	6	47	32	47	24	36	20	13	27	18	31	27	19	41	21	19	60	21	24	48	10	8	19	11	13	19
chr1_53087386_hg38	chr1	53085786	53088986	35	21	55	38	11	52	53	20	37	44	59	47	57	29	29	57	11	40	119	98	56	33	8	58	15	42	34	44	52	60	47	41	51	47	22	29	45	34	29	39	21	18	35	40	23	44
chr1_53091489_hg38	chr1	53090489	53092489	23	21	61	44	10	40	42	28	44	68	60	36	51	22	45	39	29	52	73	39	25	21	12	43	10	30	42	28	29	33	18	19	20	34	24	16	43	26	12	15	4	11	21	23	7	34
chr1_53122773_hg38	chr1	53121016	53124530	64	15	149	59	16	73	83	30	95	94	108	89	83	37	104	77	71	125	38	35	14	85	18	115	32	76	52	41	80	86	67	67	75	81	44	43	94	64	40	42	57	44	57	41	28	62
chr1_53140938_hg38	chr1	53138407	53143468	74	97	161	37	25	74	130	68	107	96	127	112	73	44	124	106	96	192	194	192	128	111	50	151	24	54	87	155	43	60	47	62	36	60	28	25	59	64	24	31	91	74	89	35	32	55
chr1_53177126_hg38	chr1	53176128	53178124	10	11	28	27	10	30	29	15	12	30	25	28	19	14	19	18	16	30	29	39	31	18	3	17	16	14	26	19	18	20	28	18	9	23	15	9	42	25	16	14	19	16	18	20	13	33
chr1_53197112_hg38	chr1	53194781	53199443	217	157	445	230	80	335	528	141	374	350	397	363	328	139	395	400	195	351	921	178	182	333	124	337	105	137	132	136	147	175	154	116	142	111	109	116	164	135	103	148	163	192	249	189	141	369
chr1_53215037_hg38	chr1	53213622	53216452	34	31	50	85	64	136	130	33	80	48	95	67	76	60	70	73	49	58	36	14	9	58	14	58	19	36	20	11	39	31	47	28	41	29	30	37	48	37	45	62	19	22	25	23	24	44
chr1_53220384_hg38	chr1	53218552	53222217	161	156	412	184	106	266	402	133	266	261	294	307	260	123	360	279	105	310	721	194	136	230	51	290	89	100	128	99	120	136	137	101	143	89	110	91	139	114	94	143	191	167	198	234	111	315
chr1_53280764_hg38	chr1	53279311	53282217	92	92	158	25	18	48	45	31	51	52	42	46	32	38	43	90	66	98	305	221	106	103	38	117	18	40	147	104	78	75	70	60	69	78	23	19	45	33	24	43	106	97	123	72	40	125
chr1_53294992_hg38	chr1	53292612	53297372	229	189	442	56	21	90	156	99	140	192	201	166	128	92	125	247	114	310	139	96	55	256	63	357	30	94	139	78	187	163	118	119	90	167	54	41	100	86	28	51	93	94	155	81	59	151
chr1_53305800_hg38	chr1	53302325	53309276	234	242	451	93	42	140	177	139	152	251	195	199	181	112	175	291	125	386	645	654	301	271	115	392	51	139	389	298	221	240	166	156	163	230	55	48	132	115	59	83	196	223	310	176	119	241
chr1_53316258_hg38	chr1	53309637	53322880	573	394	867	240	69	252	383	192	316	550	443	391	405	237	353	661	356	709	1893	1239	601	518	167	795	96	231	860	677	457	463	294	318	319	408	172	118	288	211	111	155	394	343	524	273	167	464
chr1_53326248_hg38	chr1	53323046	53329451	215	160	645	227	32	261	320	78	334	458	380	326	322	86	344	332	120	455	607	194	88	307	56	450	56	129	249	160	255	222	155	181	193	152	97	94	155	128	85	76	155	172	218	132	77	205
chr1_53391838_hg38	chr1	53389108	53394569	87	79	182	62	31	101	90	67	73	90	127	81	78	72	84	72	56	111	156	98	88	83	46	96	22	40	94	52	65	47	72	39	43	75	38	32	43	42	43	53	75	91	145	149	117	229
chr1_53396804_hg38	chr1	53395804	53397803	27	10	30	14	8	23	24	16	12	24	25	20	17	25	6	19	17	17	70	22	31	18	23	27	13	15	56	42	19	23	19	7	22	21	11	11	23	19	15	16	29	32	18	38	37	58
chr1_53413200_hg38	chr1	53411286	53415113	53	65	191	37	17	60	96	48	52	60	91	62	92	60	81	84	79	95	29	15	17	62	23	106	24	53	49	31	44	50	48	60	33	54	22	33	66	52	30	29	84	126	178	182	140	393
chr1_53417280_hg38	chr1	53416264	53418297	8	27	57	13	19	24	30	21	14	21	27	21	17	24	12	19	17	30	8	12	7	24	15	23	22	33	17	10	34	25	40	19	38	19	23	12	55	23	26	29	90	110	141	202	163	298
chr1_53477837_hg38	chr1	53476135	53479539	17	21	33	13	6	32	18	17	17	8	18	19	15	12	11	39	21	46	110	67	50	40	18	32	9	21	49	30	32	48	31	40	34	36	18	18	24	20	14	10	30	31	40	36	29	60
chr1_53485817_hg38	chr1	53484769	53486865	24	8	38	34	9	75	22	16	26	49	22	33	17	12	30	17	21	32	36	15	12	22	6	33	11	12	32	16	27	14	23	15	15	24	17	16	21	10	9	19	17	31	49	42	20	82
chr1_53525573_hg38	chr1	53521140	53530006	127	81	170	233	62	426	159	87	213	273	162	257	178	81	232	172	65	242	196	252	75	126	42	241	44	78	140	88	90	155	77	63	72	137	69	63	101	87	59	63	70	69	154	119	57	189
chr1_53537066_hg38	chr1	53533914	53540219	52	28	45	44	30	55	35	18	39	58	48	40	39	31	25	40	54	56	263	364	206	35	22	57	30	41	121	94	61	54	56	40	46	67	23	35	45	46	19	32	17	27	46	46	33	99
chr1_53619168_hg38	chr1	53616033	53622304	150	220	190	357	213	333	352	189	338	357	299	276	376	333	330	267	140	224	136	136	85	182	66	253	119	145	105	70	134	122	188	102	178	67	151	120	234	118	199	225	54	36	107	189	56	275
chr1_53738012_hg38	chr1	53736088	53739937	56	55	239	46	19	73	110	17	80	97	74	60	108	20	93	76	22	139	165	46	24	76	12	132	18	51	70	42	93	110	46	45	44	47	33	27	39	37	27	31	30	27	59	52	27	120
chr1_53838178_hg38	chr1	53836417	53839938	68	53	319	140	50	192	210	41	273	171	215	202	173	78	239	139	45	180	285	80	61	122	25	171	61	71	106	57	100	109	99	71	113	69	92	49	82	44	70	84	142	97	100	130	81	209
chr1_53863054_hg38	chr1	53862054	53864054	17	3	27	22	22	29	39	27	37	22	44	35	19	34	23	16	42	29	22	7	9	23	12	37	18	41	38	28	36	25	35	26	34	35	25	14	43	35	16	41	29	42	37	81	46	92
chr1_53946113_hg38	chr1	53943960	53948266	218	132	426	265	61	373	430	110	366	393	417	366	379	139	425	417	107	352	734	99	107	332	64	302	57	128	91	100	99	154	116	91	121	102	89	71	122	67	66	83	130	102	137	174	91	317
chr1_53950744_hg38	chr1	53948409	53953078	50	105	127	48	106	150	199	119	146	53	131	146	104	120	134	83	95	144	76	56	56	99	38	153	27	56	51	59	77	63	53	47	40	61	44	32	79	47	34	52	74	57	78	122	62	186
chr1_53963903_hg38	chr1	53962414	53965392	35	65	98	54	44	72	91	54	58	48	71	68	38	65	74	53	37	84	25	20	8	77	43	82	10	30	25	16	36	40	42	34	32	29	30	13	32	20	13	22	32	25	39	29	16	44
chr1_53982575_hg38	chr1	53981441	53983709	57	66	109	56	87	83	101	58	74	72	77	93	84	85	101	60	36	69	23	10	7	86	29	75	9	21	7	13	17	18	14	13	13	11	15	9	15	12	14	14	17	15	36	22	18	34
chr1_54029484_hg38	chr1	54027263	54031704	42	135	91	65	176	292	293	126	216	71	178	196	157	127	187	96	85	126	49	36	19	94	44	95	47	70	37	39	42	44	61	32	69	40	41	47	66	48	60	70	48	41	90	114	68	194
chr1_54046390_hg38	chr1	54043233	54049546	21	146	111	110	294	197	370	140	174	129	156	157	172	176	146	90	132	136	34	31	49	96	38	132	59	49	37	33	66	42	114	42	125	42	54	45	80	69	100	106	78	67	101	204	113	196
chr1_54052778_hg38	chr1	54049964	54055592	195	258	608	255	159	512	386	134	472	399	587	536	362	258	539	364	210	470	429	183	110	289	76	445	122	144	154	113	224	240	261	140	239	118	168	114	209	152	177	215	298	186	276	365	181	635
chr1_54103697_hg38	chr1	54102277	54105117	42	90	65	20	15	18	17	24	11	12	16	17	18	28	17	31	15	54	19	4	8	48	26	78	2	10	18	20	43	20	19	13	22	28	6	4	15	14	11	19	7	18	20	15	7	24
chr1_54111581_hg38	chr1	54110039	54113123	34	32	58	43	44	36	49	38	17	27	28	25	33	43	20	34	82	50	64	45	172	37	37	60	7	28	43	43	45	22	29	22	32	34	8	10	19	19	9	13	23	18	24	41	20	45
chr1_54119916_hg38	chr1	54115696	54124136	259	195	427	494	221	496	369	186	358	434	358	364	362	318	330	325	159	357	192	165	133	221	122	362	69	98	80	81	196	150	164	110	119	153	94	58	115	94	93	121	168	170	238	273	173	558
chr1_54172832_hg38	chr1	54170199	54175466	224	155	252	44	34	68	212	115	160	55	68	56	199	171	223	202	131	236	53	45	42	209	77	258	46	103	84	84	183	174	99	87	121	96	88	47	84	68	55	66	170	187	192	78	69	171
chr1_54221826_hg38	chr1	54218156	54225495	308	376	807	233	112	304	331	160	236	394	332	348	290	164	260	347	154	406	381	413	157	316	83	434	90	190	259	278	284	279	208	160	169	196	93	90	230	161	101	186	387	273	357	226	142	443
chr1_54228416_hg38	chr1	54226514	54230318	128	161	565	141	50	175	162	74	128	203	142	137	123	80	139	152	54	224	585	319	56	123	36	279	28	62	88	79	162	133	69	59	59	84	45	38	83	51	28	58	209	143	202	99	56	197
chr1_54247089_hg38	chr1	54246087	54248091	81	80	162	140	71	167	110	54	70	114	100	105	55	73	93	83	41	79	124	138	68	55	24	96	35	60	55	60	82	68	83	48	50	59	46	31	72	79	64	90	94	49	82	46	26	89
chr1_54274520_hg38	chr1	54272092	54276947	312	339	787	461	236	792	380	195	544	545	506	634	384	283	473	449	161	548	775	645	205	374	126	617	95	157	260	295	317	243	238	156	190	172	145	107	194	167	174	244	331	212	327	203	118	478
chr1_54281423_hg38	chr1	54280294	54282552	125	152	277	188	100	169	158	63	104	124	138	135	155	110	100	129	54	136	102	128	61	102	33	163	23	34	38	20	73	68	73	35	35	40	28	35	51	40	36	63	151	61	100	85	62	196
chr1_54289720_hg38	chr1	54285873	54293566	524	865	1349	617	402	898	569	316	561	544	564	634	530	485	541	586	455	769	408	463	313	513	191	788	142	245	176	117	464	418	310	217	294	245	183	154	323	221	224	373	500	285	429	269	179	621
chr1_54299982_hg38	chr1	54297111	54302853	345	555	627	515	448	714	566	288	599	539	609	652	488	493	491	470	331	638	324	290	275	360	145	546	117	237	145	140	332	318	277	196	242	176	154	160	288	207	186	400	315	209	361	326	204	823
chr1_54330667_hg38	chr1	54323542	54337792	892	1883	2550	1271	1076	1622	1553	839	1422	1241	1552	1341	1260	1345	1338	1266	893	1563	1362	1155	971	1099	476	1643	407	611	368	436	1000	919	791	513	680	498	462	403	810	516	584	952	940	638	928	915	490	2179
chr1_54342227_hg38	chr1	54340144	54344310	206	473	908	151	137	171	155	106	103	116	154	143	114	110	104	148	114	327	179	122	177	191	81	332	33	77	71	64	241	191	111	78	104	83	44	38	95	59	47	97	291	165	234	86	44	225
chr1_54379724_hg38	chr1	54377715	54381733	148	108	202	324	132	304	162	101	164	282	218	188	202	154	138	183	54	163	348	284	142	105	47	181	84	123	115	157	118	111	143	92	123	91	100	71	161	111	127	172	116	110	151	196	107	308
chr1_54391851_hg38	chr1	54390749	54392953	52	82	129	108	72	117	99	72	81	94	97	84	58	68	81	91	18	114	269	133	67	75	22	110	34	45	63	107	74	60	76	56	52	40	33	34	63	47	41	70	68	43	60	51	29	92
chr1_54397224_hg38	chr1	54396052	54398397	73	84	118	145	74	169	150	75	130	115	158	150	128	161	119	107	36	97	105	46	53	76	41	97	39	51	48	30	69	46	57	34	47	50	38	25	65	31	46	71	67	33	58	41	28	94
chr1_54407692_hg38	chr1	54403595	54411789	302	319	820	413	171	544	660	225	604	658	559	634	599	414	696	528	201	580	1422	372	263	432	113	539	193	192	286	225	334	278	309	193	296	208	268	142	254	153	233	197	238	179	312	290	148	558
chr1_54415210_hg38	chr1	54412516	54417903	82	92	109	95	43	157	176	156	214	131	140	144	177	211	266	116	99	148	48	65	73	96	64	134	59	82	62	56	63	76	92	56	64	87	73	44	91	57	56	74	64	76	104	76	49	176
chr1_54460034_hg38	chr1	54459019	54461050	15	13	22	35	20	42	38	26	26	36	28	33	29	22	27	21	44	26	17	16	14	14	16	19	33	31	16	15	39	39	48	19	28	32	24	28	34	37	32	37	23	26	57	83	57	173
chr1_54465432_hg38	chr1	54464348	54466516	49	23	55	34	20	61	43	31	38	51	50	42	50	34	41	55	58	54	31	29	26	58	19	80	19	24	16	18	26	41	39	26	36	38	13	13	36	23	16	30	31	29	39	31	29	90
chr1_54477120_hg38	chr1	54473037	54481204	177	101	212	200	65	180	288	107	185	316	173	150	238	137	218	195	79	197	933	509	460	178	49	232	132	182	121	130	185	171	206	133	215	129	178	115	243	133	184	186	81	112	200	133	127	425
chr1_54499802_hg38	chr1	54498594	54501011	69	48	127	97	21	63	80	26	74	106	55	55	74	27	65	74	37	90	339	116	35	68	19	107	16	41	47	44	72	48	46	33	36	43	34	28	35	25	17	30	52	61	50	34	25	87
chr1_54545820_hg38	chr1	54540821	54550820	300	305	733	462	176	589	436	214	534	608	597	693	437	374	547	438	226	523	1484	854	418	414	118	563	109	184	131	104	233	248	215	167	205	217	112	110	211	151	122	164	216	146	191	140	86	308
chr1_54571409_hg38	chr1	54569298	54573520	79	53	200	104	53	146	146	89	123	185	196	258	119	89	154	151	76	157	254	160	80	135	55	174	32	107	53	31	79	67	51	66	59	89	37	41	104	79	46	59	77	71	90	72	69	157
chr1_54582065_hg38	chr1	54578318	54585812	162	126	335	194	85	246	308	214	363	410	430	534	265	235	307	290	92	292	272	207	97	255	77	386	58	174	88	63	125	126	122	76	137	149	75	74	202	98	93	96	174	144	221	207	129	351
chr1_54609540_hg38	chr1	54608047	54611033	45	38	79	149	63	147	144	67	171	247	157	177	163	115	156	107	37	99	32	22	5	62	31	80	39	83	30	12	55	55	86	40	61	62	41	48	91	79	49	62	40	35	103	179	84	255
chr1_54715640_hg38	chr1	54714172	54717108	119	94	232	203	53	202	236	52	221	210	196	256	201	116	244	153	145	178	316	139	73	132	39	174	54	56	78	55	55	57	81	36	64	40	68	31	66	54	69	73	140	109	173	193	90	284
chr1_54737090_hg38	chr1	54735871	54738308	38	41	53	110	77	118	102	65	115	72	103	105	86	80	86	78	45	61	28	15	11	48	31	59	16	24	11	13	25	31	34	28	24	24	19	7	26	24	9	25	24	13	25	33	14	30
chr1_54742770_hg38	chr1	54740617	54744924	76	54	80	65	39	108	143	87	115	83	125	94	91	71	125	95	43	91	128	37	34	91	24	104	57	106	82	63	91	98	90	71	81	93	67	64	97	70	56	95	58	70	57	85	52	122
chr1_54764570_hg38	chr1	54762933	54766207	82	71	146	107	39	89	169	68	127	115	117	144	164	87	156	99	24	127	188	46	40	108	28	111	32	38	60	58	53	88	65	46	58	47	61	38	54	32	35	53	65	44	72	84	35	111
chr1_54794575_hg38	chr1	54792157	54796993	57	58	104	45	27	44	109	89	112	40	62	77	96	69	160	83	62	104	23	23	15	96	37	183	36	56	31	20	70	80	66	52	59	63	51	28	53	44	30	30	38	40	55	45	31	66
chr1_54800340_hg38	chr1	54798409	54802270	59	19	78	33	17	94	104	58	170	44	57	62	111	45	267	72	27	60	44	17	9	54	16	87	25	81	29	20	72	62	43	45	34	52	83	38	51	50	28	39	49	29	41	39	14	50
chr1_54850772_hg38	chr1	54848964	54852581	92	106	182	116	117	190	117	67	113	82	146	139	84	91	107	125	71	131	52	42	18	121	49	131	53	63	65	47	48	79	103	58	82	58	51	61	137	56	93	125	64	72	130	275	107	372
chr1_54871738_hg38	chr1	54870578	54872898	88	63	97	170	98	213	112	47	115	146	183	154	127	91	105	144	73	113	38	16	14	74	26	123	21	27	17	8	22	25	51	17	29	21	25	19	46	31	43	47	36	47	36	197	95	189
chr1_54875278_hg38	chr1	54874232	54876325	24	25	40	48	46	104	26	21	22	40	51	49	16	29	31	34	23	59	38	29	21	17	17	38	24	48	20	19	40	37	76	28	43	20	36	36	84	31	44	93	26	18	39	96	25	118
chr1_54885886_hg38	chr1	54882677	54889095	257	256	693	422	216	649	353	125	467	429	673	602	324	216	442	414	250	577	689	231	191	276	87	499	222	219	265	173	327	291	434	227	531	161	287	192	367	251	438	363	302	249	392	745	299	1086
chr1_54950044_hg38	chr1	54948288	54951800	119	116	212	151	56	180	200	83	177	166	192	178	191	154	188	142	67	155	483	345	130	114	24	162	38	55	176	134	85	84	91	56	70	51	67	41	77	53	81	77	28	43	60	79	37	172
chr1_54973606_hg38	chr1	54972608	54974603	19	15	52	21	18	47	40	15	34	29	50	40	36	12	34	38	15	36	31	9	10	33	8	43	8	24	19	17	25	34	28	25	20	33	19	6	22	14	20	19	28	18	38	21	18	39
chr1_54981136_hg38	chr1	54978978	54983294	55	33	87	73	24	62	66	23	37	149	71	50	66	23	44	71	25	53	594	229	88	46	14	63	13	35	122	123	52	42	38	20	36	40	29	29	34	45	29	38	23	32	41	64	45	141
chr1_54988802_hg38	chr1	54986912	54990693	60	69	87	37	14	40	38	23	21	50	41	43	28	27	22	48	17	48	257	249	91	46	24	52	5	12	20	29	12	7	7	5	7	8	6	5	6	12	6	8	24	27	38	57	56	136
chr1_54997073_hg38	chr1	54996064	54998082	30	5	44	44	8	36	27	14	33	71	31	41	41	9	24	18	3	34	126	90	43	17	9	30	19	35	48	18	37	23	31	24	23	26	19	14	21	16	20	38	13	21	31	41	29	67
chr1_55039403_hg38	chr1	55036675	55042131	28	20	69	28	15	36	36	22	27	47	33	18	24	17	21	39	25	44	720	504	166	31	14	37	16	31	458	351	46	32	30	18	31	36	22	26	26	20	22	26	26	41	55	85	46	111
chr1_55043646_hg38	chr1	55042133	55045160	13	28	45	17	8	21	31	13	14	20	28	14	22	23	22	16	41	23	229	244	135	17	15	27	4	28	131	80	37	17	10	12	14	17	7	9	20	21	8	11	11	16	21	18	13	36
chr1_55049812_hg38	chr1	55047908	55051716	61	28	76	54	17	53	47	29	42	75	60	54	44	30	32	50	14	59	472	310	123	46	15	47	17	37	151	191	40	46	54	30	34	56	19	21	44	38	33	34	23	19	33	91	24	137
chr1_55053744_hg38	chr1	55052730	55054757	16	13	15	65	19	33	50	14	15	63	62	22	56	21	22	44	13	15	69	34	19	32	5	15	4	17	30	37	13	25	20	15	19	24	14	13	16	13	11	16	7	13	21	24	13	29
chr1_55067257_hg38	chr1	55061603	55072911	141	132	233	156	134	248	259	150	190	217	226	188	163	131	180	193	82	210	1188	774	476	170	96	232	65	107	490	578	134	122	135	108	135	126	101	57	168	108	106	127	140	135	211	158	100	269
chr1_55088276_hg38	chr1	55086938	55089614	16	20	28	24	30	70	79	27	31	15	46	65	29	17	50	27	21	36	33	10	16	23	6	37	18	24	37	28	27	24	22	17	29	25	18	11	34	24	25	23	21	23	28	37	12	51
chr1_55142676_hg38	chr1	55140660	55144693	23	78	69	22	70	59	98	66	43	29	55	38	48	38	51	42	37	45	111	50	37	70	20	84	18	28	37	27	37	37	37	36	35	33	26	30	67	24	30	46	14	19	25	29	17	41
chr1_55153256_hg38	chr1	55150884	55155629	19	91	80	45	111	103	247	113	85	53	169	105	54	63	100	59	59	93	60	20	23	79	50	99	28	45	36	38	54	58	52	54	52	37	37	48	123	58	54	65	35	39	47	65	29	76
chr1_55194644_hg38	chr1	55193640	55195648	9	43	23	16	34	43	76	50	24	21	35	37	25	38	38	27	18	42	67	48	37	26	19	27	13	22	28	20	18	39	25	21	19	20	14	13	41	18	27	20	25	23	32	19	22	45
chr1_55251564_hg38	chr1	55247740	55255388	29	33	54	39	95	93	111	115	78	60	90	84	60	115	81	46	41	72	1126	639	460	45	48	43	39	57	182	192	44	53	82	42	50	61	45	40	81	58	46	77	27	41	52	46	25	80
chr1_55276137_hg38	chr1	55273765	55278509	49	97	107	113	140	217	194	111	131	116	159	132	126	154	165	133	73	126	123	79	99	95	56	132	64	81	44	41	66	72	70	68	45	45	64	40	157	75	65	118	59	75	101	99	71	220
chr1_55285442_hg38	chr1	55284351	55286532	8	31	27	25	58	48	60	37	54	20	41	52	34	24	55	20	63	31	49	22	28	16	14	26	28	22	24	14	17	23	34	15	23	21	31	30	36	29	28	67	22	39	67	87	72	182
chr1_55334059_hg38	chr1	55331699	55336419	25	23	26	58	53	70	54	59	56	56	57	43	52	121	44	26	52	36	69	138	165	13	42	21	44	55	66	36	38	29	51	36	48	40	33	24	63	42	44	55	33	39	64	76	55	195
chr1_55352010_hg38	chr1	55348372	55355648	61	105	33	95	167	123	213	125	142	89	116	95	113	138	109	88	72	67	1093	260	283	49	42	84	57	67	282	232	64	69	105	65	67	56	64	52	86	44	80	122	49	65	89	91	83	253
chr1_55373844_hg38	chr1	55368821	55378867	122	372	215	313	488	515	901	363	815	330	784	587	476	614	691	317	383	376	138	93	136	265	159	368	219	193	109	62	203	200	341	118	416	119	287	212	346	158	338	377	192	230	358	692	364	1219
chr1_55443508_hg38	chr1	55442508	55444507	10	50	45	12	22	35	58	32	21	20	29	24	39	14	31	30	21	31	77	34	26	16	9	37	13	9	46	25	18	21	19	18	16	15	16	7	18	17	13	14	27	34	57	77	36	180
chr1_55507190_hg38	chr1	55505568	55508811	23	28	25	36	54	42	88	65	52	35	55	43	69	70	39	33	37	29	30	22	31	11	34	15	35	52	30	9	49	30	62	22	41	38	45	44	74	39	44	87	12	11	24	33	28	67
chr1_55540124_hg38	chr1	55538485	55541764	22	72	49	40	91	57	172	74	137	77	120	92	103	96	93	70	48	73	25	12	12	52	34	59	26	39	32	16	11	22	30	22	30	18	26	17	38	25	37	45	16	17	23	29	17	84
chr1_55559076_hg38	chr1	55557785	55560368	29	63	39	11	36	23	34	25	20	12	29	21	24	35	22	41	40	39	120	36	47	25	22	51	5	18	64	57	24	17	22	12	26	22	10	14	18	21	14	14	37	30	38	41	28	72
chr1_55576171_hg38	chr1	55574989	55577353	34	76	76	55	55	61	76	34	47	51	41	46	60	73	40	45	19	53	36	20	45	42	23	52	18	22	30	19	44	36	25	15	23	16	19	19	39	23	17	36	50	50	102	182	121	318
chr1_55583092_hg38	chr1	55579825	55586360	58	119	98	91	150	126	214	130	92	86	108	170	91	110	100	78	78	65	59	16	33	89	61	82	51	63	47	38	106	57	102	49	72	52	59	41	124	53	62	106	62	88	129	241	128	397
chr1_55670342_hg38	chr1	55668963	55671721	11	45	23	22	85	54	123	54	69	22	72	57	23	39	59	35	46	26	12	7	3	45	27	43	22	16	8	13	23	25	36	31	25	28	27	23	45	28	33	32	13	13	35	61	35	77
chr1_55775209_hg38	chr1	55774209	55776209	2	7	3	3	7	5	6	7	2	2	1	3	3	5	6	4	3	1	88	23	20	4	5	5	3	7	24	34	8	5	7	4	11	11	0	0	6	3	4	5	4	5	8	12	6	9
chr1_55929948_hg38	chr1	55928949	55930947	2	8	5	11	6	8	11	7	4	4	14	3	4	5	1	7	14	18	12	12	5	14	4	14	1	3	6	9	38	15	4	5	6	9	5	7	4	4	6	2	5	9	18	29	5	34
chr1_55937790_hg38	chr1	55936037	55939544	14	6	21	27	5	41	33	30	15	10	20	32	32	23	10	18	26	10	257	102	47	10	9	27	14	26	85	57	23	15	17	16	19	13	12	12	36	22	14	22	16	18	37	40	35	93
chr1_56063169_hg38	chr1	56061115	56065223	13	39	24	27	75	123	77	52	60	19	57	77	44	66	47	36	28	49	37	24	25	30	32	39	47	47	28	22	34	48	89	25	69	29	50	56	107	31	64	83	72	78	154	296	141	447
chr1_56073790_hg38	chr1	56071901	56075680	7	23	48	11	31	26	60	41	40	28	31	33	26	21	44	21	21	44	320	39	39	38	19	36	18	21	84	95	27	18	35	6	26	31	21	16	42	26	22	28	42	49	60	118	48	169
chr1_56189231_hg38	chr1	56187424	56191038	15	69	28	36	122	82	134	110	83	40	93	119	32	79	68	42	27	57	14	7	11	44	23	35	23	29	20	22	39	22	38	18	26	19	21	13	42	22	40	43	66	83	139	268	190	556
chr1_56259238_hg38	chr1	56258167	56260310	18	17	12	23	47	47	63	46	43	11	34	37	24	46	42	31	39	27	18	2	7	11	16	19	5	11	10	21	8	11	15	4	9	12	14	6	15	12	10	7	5	6	14	23	12	35
chr1_56363641_hg38	chr1	56362509	56364773	6	44	30	24	59	43	110	32	61	21	45	43	36	22	42	17	39	38	10	4	4	23	25	31	23	24	15	8	26	19	52	20	41	15	27	21	35	26	39	54	48	48	77	167	91	277
chr1_56378379_hg38	chr1	56376945	56379813	25	58	40	55	76	94	138	73	99	54	84	73	67	77	61	70	18	57	24	12	16	44	23	48	52	54	25	24	38	39	84	42	65	41	53	41	70	38	66	87	30	40	64	94	55	187
chr1_56412099_hg38	chr1	56410846	56413352	23	63	48	65	117	99	135	58	95	61	86	75	70	113	83	57	66	68	14	7	8	56	20	57	42	24	13	11	26	20	51	8	43	13	30	19	34	29	55	46	12	24	33	47	35	121
chr1_56435300_hg38	chr1	56429859	56440742	272	611	507	385	703	731	1189	587	1499	537	1315	1127	651	864	1299	619	612	841	96	44	101	451	256	715	309	225	122	76	225	222	500	163	593	142	360	215	465	238	493	434	229	284	418	814	490	1537
chr1_56477414_hg38	chr1	56476051	56478777	112	99	130	262	119	211	368	133	256	306	322	264	307	228	285	246	56	205	48	25	10	136	45	176	67	97	32	15	98	65	118	42	117	54	84	69	139	68	104	101	130	132	156	198	138	385
chr1_56510469_hg38	chr1	56509333	56511605	44	79	88	87	110	203	142	96	159	91	143	170	86	155	152	118	121	115	33	11	4	90	35	90	54	64	19	12	38	53	93	41	76	55	50	29	87	50	80	116	67	61	100	125	108	300
chr1_56516244_hg38	chr1	56514967	56517522	24	70	111	42	104	159	180	101	131	51	123	109	56	49	146	63	102	89	21	4	12	74	26	92	41	50	27	23	41	68	71	49	62	49	52	32	103	44	63	116	38	45	81	110	48	171
chr1_56530391_hg38	chr1	56529330	56531452	18	61	67	38	99	171	236	109	147	42	111	139	65	25	127	73	97	73	21	1	7	65	32	80	40	34	15	19	33	25	54	34	52	31	45	31	80	49	43	75	34	31	45	68	38	107
chr1_56552152_hg38	chr1	56549183	56555120	93	234	232	106	309	388	457	229	456	164	333	471	193	261	424	246	196	282	51	20	19	226	123	330	138	121	40	31	114	108	233	113	163	127	129	81	232	112	184	209	143	160	261	286	160	603
chr1_56557998_hg38	chr1	56556835	56559162	28	110	65	49	135	119	187	95	134	64	137	122	54	95	139	48	75	89	13	4	7	92	43	101	45	45	13	14	39	30	54	32	57	26	53	42	89	33	66	68	52	37	58	101	56	172
chr1_56573899_hg38	chr1	56572892	56574906	19	62	54	37	103	127	164	75	103	54	128	114	50	83	109	46	55	83	11	9	12	63	37	62	24	38	17	10	23	27	50	33	20	17	16	17	57	35	40	44	39	32	46	69	51	109
chr1_56578326_hg38	chr1	56576002	56580651	126	206	490	278	188	744	441	187	693	340	657	697	338	269	683	373	165	517	170	46	26	321	65	483	158	141	92	33	205	163	270	166	309	126	196	134	255	151	314	202	221	164	279	402	202	732
chr1_56645393_hg38	chr1	56643469	56647317	104	157	417	172	72	184	216	105	191	255	219	183	220	131	251	213	88	284	496	212	101	204	40	291	79	116	204	128	156	213	120	106	115	101	129	75	104	91	95	129	102	97	83	107	76	173
chr1_56788836_hg38	chr1	56787837	56789836	7	25	16	17	30	32	23	37	18	16	15	23	17	19	32	18	24	37	40	23	19	23	13	16	5	17	37	14	14	14	12	5	9	11	12	7	18	12	12	8	8	12	11	20	11	27
chr1_56797756_hg38	chr1	56796364	56799148	17	61	46	37	85	52	85	45	66	39	62	49	48	33	56	53	62	55	125	53	78	46	25	70	19	25	29	15	18	19	23	18	24	24	14	24	53	32	26	35	28	25	28	43	27	66
chr1_56819463_hg38	chr1	56817050	56821876	27	40	37	39	48	53	51	35	39	40	43	45	29	46	42	33	20	54	785	418	163	42	19	45	29	38	171	113	32	35	47	27	34	45	18	26	68	32	52	55	41	27	40	39	38	110
chr1_56934346_hg38	chr1	56930451	56938241	14	25	14	25	19	36	48	32	21	10	19	24	19	22	16	23	24	28	1003	363	310	23	21	17	13	17	122	129	13	20	22	13	22	17	10	14	6	11	8	14	21	16	39	28	18	63
chr1_56940208_hg38	chr1	56938355	56942060	5	12	11	3	4	5	16	5	11	0	10	7	6	5	2	8	5	12	289	145	111	12	5	14	2	7	37	26	8	10	12	6	5	9	8	7	5	6	5	6	6	7	11	9	8	20
chr1_57025917_hg38	chr1	57023676	57028158	61	131	142	92	128	164	271	100	241	112	138	167	135	122	224	141	135	163	127	126	65	131	55	151	53	70	61	60	72	83	83	57	68	64	58	56	78	62	60	77	90	102	120	56	116	262
chr1_57086408_hg38	chr1	57084692	57088125	29	50	54	12	18	17	38	24	10	11	35	16	13	17	17	38	25	42	333	85	90	41	36	47	9	15	75	134	29	44	28	22	27	32	17	7	24	14	7	23	20	27	45	18	19	48
chr1_57103208_hg38	chr1	57102205	57104210	13	34	37	4	3	7	22	12	3	8	16	11	7	4	14	19	34	31	33	17	18	37	19	30	4	8	14	21	31	30	8	17	8	17	9	9	11	6	10	8	26	10	19	12	6	29
chr1_57163662_hg38	chr1	57161572	57165752	24	108	73	29	66	103	142	56	75	28	73	56	49	36	89	54	32	71	221	109	109	71	45	69	18	28	81	98	51	46	34	36	27	34	26	23	70	27	30	50	43	55	60	61	58	121
chr1_57253207_hg38	chr1	57252188	57254226	12	35	28	7	5	9	17	23	15	3	13	17	6	15	9	10	20	24	166	83	47	24	18	16	0	8	22	29	18	10	12	5	8	9	13	5	12	10	9	7	31	34	36	12	10	20
chr1_57273378_hg38	chr1	57271889	57274866	33	110	94	3	21	16	31	8	8	7	13	8	8	17	8	26	52	53	75	61	71	45	47	71	4	12	17	24	23	19	9	11	12	23	7	4	10	6	8	5	18	18	31	11	15	30
chr1_57319582_hg38	chr1	57309631	57329534	272	718	550	44	50	105	200	99	54	44	93	79	51	59	50	208	210	319	3664	1693	1068	372	156	375	39	71	707	911	388	282	101	91	125	166	49	42	77	59	44	46	375	260	314	145	91	254
chr1_57411653_hg38	chr1	57410653	57412653	7	24	21	2	5	11	19	6	4	5	7	4	7	4	3	5	10	14	92	46	53	12	6	10	1	6	33	43	7	10	1	6	6	7	0	4	8	4	3	7	13	11	19	7	8	14
chr1_57422786_hg38	chr1	57419597	57425974	89	107	456	37	14	56	90	26	65	71	117	53	54	34	86	122	29	166	1093	704	156	128	21	199	21	35	380	249	176	145	65	75	75	101	34	28	40	33	17	40	246	149	159	90	54	159
chr1_57512940_hg38	chr1	57511936	57513943	7	4	8	3	10	21	13	5	7	7	6	2	7	5	7	10	1	13	8	6	3	13	2	15	8	17	36	29	20	19	28	16	10	7	13	12	28	23	16	14	40	41	31	46	27	60
chr1_57623142_hg38	chr1	57621211	57625074	34	30	50	16	24	22	91	43	36	41	51	24	28	40	44	59	66	68	176	134	92	67	39	67	12	23	29	29	37	32	26	19	24	33	14	21	27	19	14	15	40	40	45	20	26	51
chr1_57908450_hg38	chr1	57907334	57909566	19	14	20	8	9	8	13	13	11	1	13	4	9	6	6	21	24	20	85	19	29	18	8	22	2	12	40	62	8	13	15	5	18	16	9	6	11	5	4	4	19	17	26	9	5	11
chr1_57958872_hg38	chr1	57956215	57961529	28	69	45	18	19	21	44	23	18	10	32	21	9	13	20	39	11	40	228	156	93	59	18	56	11	24	78	99	52	43	27	25	34	49	11	8	31	19	16	17	48	53	46	36	15	51
chr1_58145066_hg38	chr1	58143940	58146193	11	12	5	11	7	15	34	30	8	18	21	13	6	14	8	16	17	12	12	3	3	20	7	24	30	24	13	16	36	33	37	18	36	12	31	24	39	25	30	49	14	18	11	19	10	22
chr1_58249588_hg38	chr1	58247621	58251554	75	110	339	43	16	34	84	37	107	55	105	62	62	27	117	118	95	212	46	18	14	152	39	225	25	40	52	18	126	132	63	73	68	84	62	35	32	32	29	30	177	110	133	65	35	101
chr1_58313062_hg38	chr1	58311447	58314676	5	62	73	8	10	15	16	22	13	7	15	11	4	7	12	17	31	28	11	3	3	31	19	35	7	16	17	22	29	22	10	10	17	16	6	11	14	8	10	5	18	11	17	14	10	24
chr1_58411410_hg38	chr1	58408642	58414178	34	149	195	11	25	30	64	37	19	16	23	25	25	20	25	24	7	65	29	13	8	74	34	62	14	27	23	23	72	40	23	20	19	25	12	16	20	16	13	16	72	52	49	33	30	53
chr1_58545256_hg38	chr1	58542311	58548202	125	227	490	138	134	330	488	207	364	210	354	319	235	174	409	250	176	336	454	223	75	317	73	381	86	151	114	95	177	218	187	123	180	105	160	103	184	113	135	134	159	169	149	203	99	276
chr1_58571171_hg38	chr1	58569452	58572890	23	80	65	54	111	91	152	86	173	67	104	120	53	73	185	48	45	94	27	5	6	30	41	59	46	35	16	24	33	41	83	29	85	22	52	43	85	43	91	73	35	31	43	62	33	129
chr1_58579060_hg38	chr1	58575948	58582172	82	185	160	252	213	292	364	173	430	211	271	274	212	236	336	184	164	210	38	13	16	111	75	185	140	91	56	30	111	114	215	74	201	55	149	89	188	97	196	177	76	91	155	230	135	393
chr1_58585710_hg38	chr1	58584155	58587264	43	103	177	33	58	57	79	62	74	41	56	71	54	60	60	33	31	65	13	7	14	47	28	52	37	51	32	19	59	39	64	36	47	34	36	22	65	38	46	40	30	13	24	41	32	83
chr1_58650030_hg38	chr1	58648864	58651195	31	49	31	31	48	54	68	49	70	49	55	56	44	48	39	36	18	46	23	0	11	38	19	38	23	35	21	11	42	42	46	23	32	32	37	25	41	39	37	50	20	25	29	43	20	59
chr1_58664646_hg38	chr1	58662679	58666612	19	65	51	41	115	60	190	110	74	89	82	81	81	69	85	66	61	76	14	17	4	63	24	66	29	41	15	19	38	34	50	22	45	27	36	30	82	35	47	43	31	43	52	66	56	97
chr1_58695552_hg38	chr1	58693599	58697506	21	85	73	48	98	116	126	84	119	75	107	84	83	49	74	50	54	87	29	16	21	49	31	96	43	33	24	26	49	31	90	29	79	39	45	31	43	53	63	87	65	44	57	62	26	87
chr1_58710524_hg38	chr1	58709305	58711742	18	46	62	8	23	23	21	21	11	19	12	16	13	16	6	27	17	50	108	22	16	42	26	45	6	16	37	57	18	24	13	12	18	20	11	3	13	6	4	10	42	51	39	20	11	58
chr1_58784044_hg38	chr1	58780218	58787869	350	371	1721	472	168	1268	813	259	1328	723	1440	1337	704	418	1345	703	275	1267	1442	780	180	596	168	1232	304	361	614	263	526	633	599	421	809	350	552	286	483	319	493	300	656	420	580	749	329	1328
chr1_58815328_hg38	chr1	58812634	58818021	182	190	472	199	139	251	399	201	412	312	386	333	317	223	420	280	157	329	620	342	154	281	120	345	112	180	184	156	162	228	160	112	151	130	147	83	229	132	124	117	168	168	267	233	124	425
chr1_58849260_hg38	chr1	58848021	58850499	29	99	120	38	62	90	93	42	94	71	95	107	47	63	94	43	30	103	321	171	59	54	27	81	23	32	114	84	43	37	34	25	26	33	22	28	46	21	34	37	50	43	57	68	26	100
chr1_58853454_hg38	chr1	58852173	58854734	21	71	63	54	100	132	104	57	131	51	96	151	47	92	127	45	74	88	37	9	17	48	35	58	37	49	29	19	32	41	86	27	44	29	30	27	68	45	55	89	45	36	94	115	67	264
chr1_58874612_hg38	chr1	58872451	58876774	72	146	144	117	184	224	379	204	313	147	258	320	161	302	310	135	152	202	50	28	25	142	85	183	67	79	25	30	52	74	106	61	94	46	60	51	150	72	75	96	50	61	122	173	90	314
chr1_58884744_hg38	chr1	58881716	58887772	155	309	388	139	178	241	374	214	250	230	259	321	211	246	331	284	174	334	54	43	68	315	132	360	84	128	64	39	141	150	142	102	111	103	85	56	204	101	80	109	118	113	161	118	68	225
chr1_58895224_hg38	chr1	58892557	58897890	121	135	173	162	110	225	274	155	226	237	288	227	208	247	235	219	113	195	76	65	92	159	86	204	54	103	34	30	82	77	76	65	84	88	47	52	128	64	62	71	47	57	93	93	45	160
chr1_58968622_hg38	chr1	58967539	58969706	15	22	49	17	13	48	64	45	46	16	41	56	47	30	39	31	13	47	62	13	7	35	22	39	10	29	13	16	17	24	13	10	22	21	11	9	41	15	9	8	18	13	15	22	9	28
chr1_59013539_hg38	chr1	59012351	59014727	20	32	54	30	21	55	126	60	43	49	102	45	62	55	51	45	33	62	20	11	12	83	29	55	13	47	7	13	27	27	27	29	33	44	32	21	36	38	14	20	30	32	35	27	14	52
chr1_59020440_hg38	chr1	59019302	59021578	12	25	56	14	37	58	71	59	38	22	81	65	26	31	40	36	60	56	13	6	8	28	29	52	15	30	16	11	20	26	26	23	29	26	20	18	41	9	9	28	10	16	7	10	7	23
chr1_59108278_hg38	chr1	59104917	59111638	58	75	105	31	37	67	93	71	72	46	87	54	57	50	52	68	57	80	555	187	224	72	48	69	16	41	71	50	36	42	38	31	39	45	27	22	59	44	18	32	33	26	32	19	20	38
chr1_59139396_hg38	chr1	59136403	59142389	76	90	145	48	62	176	135	129	117	64	172	137	100	94	129	129	87	157	44	22	30	161	75	161	28	81	42	35	56	66	47	53	49	87	38	34	64	39	30	49	28	28	36	59	24	105
chr1_59147114_hg38	chr1	59145853	59148376	82	53	132	53	26	85	116	32	64	130	107	112	106	63	89	90	76	127	51	31	26	83	22	127	7	31	17	9	19	30	29	19	24	20	13	7	27	21	10	13	20	31	35	48	24	93
chr1_59156300_hg38	chr1	59154341	59158259	21	27	97	10	22	60	84	53	47	53	75	72	45	35	77	68	27	89	37	22	27	104	24	94	17	28	8	17	24	23	37	27	28	32	21	19	36	31	12	24	14	15	24	15	20	31
chr1_59296904_hg38	chr1	59293025	59300784	178	283	610	206	167	353	513	275	438	296	455	430	356	313	493	302	224	443	937	618	277	393	104	445	89	148	135	148	184	213	152	148	165	149	125	111	185	133	135	135	259	170	196	238	138	356
chr1_59310214_hg38	chr1	59308801	59311626	9	28	22	8	12	16	53	31	18	16	19	21	18	25	12	16	13	21	605	130	57	27	9	15	7	27	28	49	10	7	13	10	10	21	9	12	28	13	7	18	8	18	7	10	5	16
chr1_59317658_hg38	chr1	59315780	59319535	21	46	63	19	27	49	125	69	57	43	63	64	44	38	76	46	21	57	134	53	85	62	37	62	24	42	20	23	32	26	32	19	33	40	31	24	73	41	39	34	56	36	42	18	16	55
chr1_59394522_hg38	chr1	59390315	59398730	57	133	158	41	122	129	363	205	133	103	191	181	128	106	166	150	79	167	1840	561	307	220	96	185	50	111	386	315	63	83	100	71	83	99	58	60	140	87	50	96	76	79	110	207	131	288
chr1_59423368_hg38	chr1	59420697	59426038	29	43	79	30	22	44	136	72	52	52	41	71	61	40	77	66	13	78	355	176	186	87	21	65	17	29	83	129	25	18	32	30	22	51	30	12	34	37	16	18	20	32	31	34	30	41
chr1_59427800_hg38	chr1	59426799	59428802	13	9	25	8	8	16	32	30	24	21	35	18	16	22	25	25	15	26	107	62	52	27	8	27	7	10	40	54	8	6	8	13	9	15	5	5	11	9	3	5	8	15	16	18	10	26
chr1_59446726_hg38	chr1	59445524	59447928	18	32	50	10	29	32	121	58	56	30	58	60	34	19	45	29	13	54	76	26	33	75	34	64	11	43	29	20	13	28	10	15	16	32	22	18	30	22	11	15	19	15	28	31	17	53
chr1_59520964_hg38	chr1	59519251	59522676	21	49	46	10	29	46	79	36	21	31	41	34	25	32	38	34	33	32	427	196	98	57	16	43	8	24	70	85	19	17	26	19	23	38	10	13	18	12	16	14	32	18	45	32	22	57
chr1_59552082_hg38	chr1	59550978	59553186	18	22	33	11	17	33	88	54	49	35	41	44	45	50	48	23	31	44	30	30	18	35	20	36	5	14	11	13	5	4	10	6	6	16	6	2	16	8	3	9	50	36	45	44	28	91
chr1_59597318_hg38	chr1	59596267	59598370	13	23	59	17	17	20	27	30	24	14	21	22	18	20	34	24	7	35	27	54	51	39	13	27	9	22	10	14	16	14	22	9	22	23	7	9	23	6	11	17	6	8	18	11	7	16
chr1_59619535_hg38	chr1	59618408	59620662	8	28	26	24	47	42	85	39	58	26	27	29	32	17	33	8	38	27	18	6	2	6	13	21	12	11	7	7	16	12	25	10	17	11	11	8	14	10	17	34	8	8	4	6	1	13
chr1_59638540_hg38	chr1	59637546	59639535	10	11	25	17	20	25	53	24	25	18	27	32	19	23	30	19	19	21	31	3	11	14	9	22	30	13	9	14	22	8	18	7	13	20	5	6	26	17	25	12	9	6	18	17	14	18
chr1_59671028_hg38	chr1	59667149	59674906	119	185	275	140	182	269	380	259	304	252	396	387	227	297	330	200	140	251	91	56	48	193	96	262	101	133	61	49	105	98	181	79	129	96	95	82	190	117	128	159	67	75	122	170	121	311
chr1_59702292_hg38	chr1	59700088	59704497	13	65	77	23	43	77	134	94	73	33	67	88	49	44	79	46	18	55	157	81	116	64	42	60	33	32	41	33	44	37	49	31	44	40	29	22	64	40	44	52	52	47	58	81	49	114
chr1_59707014_hg38	chr1	59704827	59709201	50	87	129	30	55	70	278	118	160	76	101	100	106	88	157	59	54	74	243	102	124	91	49	92	24	38	29	38	53	52	50	33	47	47	33	33	75	42	32	46	47	67	63	101	59	121
chr1_59743750_hg38	chr1	59741962	59745538	24	83	96	24	51	85	228	99	89	70	115	101	111	93	117	45	56	96	43	28	28	83	39	87	20	49	22	19	31	46	47	35	50	51	38	26	70	34	26	51	42	36	49	34	25	67
chr1_59751925_hg38	chr1	59749993	59753857	31	121	89	48	101	113	301	165	162	71	156	134	120	127	212	76	85	83	26	17	18	72	45	77	40	62	22	20	44	41	62	30	49	26	54	38	71	46	46	70	32	39	31	98	43	133
chr1_59755476_hg38	chr1	59754029	59756924	26	62	66	33	44	68	130	113	116	41	45	61	82	100	131	41	49	67	30	23	19	57	25	67	24	49	23	31	34	46	49	32	30	44	39	22	60	22	34	45	61	41	73	35	28	93
chr1_59759372_hg38	chr1	59758185	59760558	21	48	80	29	48	94	126	72	81	36	53	69	59	38	78	47	35	56	37	21	18	66	9	64	31	43	24	18	46	33	59	31	49	30	25	17	64	20	36	33	22	23	51	52	14	78
chr1_59815709_hg38	chr1	59813269	59818149	74	83	260	52	27	54	93	18	80	72	49	64	69	32	103	84	25	130	398	100	77	117	35	150	47	68	84	71	104	94	97	44	76	65	68	60	73	52	74	107	144	95	121	130	75	218
chr1_59857395_hg38	chr1	59856128	59858662	18	59	27	8	8	20	52	38	19	8	19	17	15	7	26	10	6	24	48	17	8	26	12	29	18	26	51	44	29	19	49	13	26	19	20	20	27	32	38	30	28	16	45	81	37	123
chr1_59880752_hg38	chr1	59879534	59881969	18	30	47	16	23	25	55	28	24	25	27	35	21	10	33	17	12	24	21	3	7	26	15	19	33	38	37	28	30	30	38	28	44	20	35	33	31	37	54	57	96	89	142	243	120	458
chr1_59901026_hg38	chr1	59899939	59902113	32	26	22	28	38	79	75	51	51	69	57	62	52	58	45	37	36	40	18	3	7	28	12	35	18	32	9	9	29	18	36	14	17	25	10	14	22	30	31	37	36	27	59	73	44	137
chr1_59917756_hg38	chr1	59914148	59921365	145	419	304	210	519	462	973	391	661	314	651	586	431	522	599	385	336	452	99	22	63	361	183	450	143	135	48	31	97	81	198	60	213	73	136	114	204	102	179	229	171	177	292	559	288	772
chr1_59926877_hg38	chr1	59925354	59928400	57	90	126	139	127	220	280	134	216	210	214	197	143	214	207	138	85	138	43	27	13	116	30	141	57	52	25	16	61	31	90	32	97	45	68	44	86	49	83	109	109	84	157	293	137	467
chr1_59967444_hg38	chr1	59966360	59968528	21	61	53	5	11	18	12	29	11	12	15	16	7	19	16	25	20	36	16	4	8	52	17	39	13	11	11	12	36	26	19	10	25	20	9	10	16	12	15	11	12	14	26	23	9	42
chr1_59972954_hg38	chr1	59970426	59975482	54	56	84	41	25	66	121	62	64	62	62	97	61	37	73	78	23	104	131	162	127	100	35	127	24	59	36	50	48	51	64	41	45	76	46	21	58	27	32	63	53	63	78	79	56	108
chr1_59986821_hg38	chr1	59984885	59988757	24	47	66	23	25	32	101	67	66	63	45	84	50	14	68	74	27	73	44	7	16	115	23	127	14	45	20	35	22	24	32	31	21	50	16	15	36	32	21	32	59	63	75	58	50	102
chr1_60073464_hg38	chr1	60072466	60074463	12	5	12	15	6	16	37	8	9	39	13	10	15	12	5	15	3	11	6	3	6	16	7	21	7	31	8	11	13	11	6	13	7	13	9	6	12	10	4	10	11	14	25	19	18	52
chr1_60280529_hg38	chr1	60279496	60281562	14	22	40	10	17	32	46	45	43	33	24	36	32	29	40	35	15	44	15	8	10	27	14	44	14	25	12	15	33	19	28	16	23	12	18	14	35	33	25	52	20	26	30	44	38	80
chr1_60402838_hg38	chr1	60401360	60404317	6	27	32	24	75	30	97	45	38	18	33	49	19	43	35	22	23	30	7	2	4	33	17	29	21	34	17	20	19	6	31	16	28	18	53	22	26	22	39	34	28	26	30	60	43	115
chr1_60622104_hg38	chr1	60620286	60623923	37	129	159	43	134	87	165	117	133	54	85	94	83	90	205	45	123	131	17	4	13	93	40	126	41	56	11	16	72	74	77	29	52	45	68	37	61	43	62	57	49	28	61	95	51	138
chr1_60656930_hg38	chr1	60654636	60659223	23	74	73	67	188	176	235	118	164	50	124	182	90	75	129	37	80	87	32	8	15	59	24	84	75	40	27	32	38	41	82	23	69	20	44	39	74	57	63	76	65	82	111	220	113	427
chr1_60733152_hg38	chr1	60732036	60734269	10	10	10	22	11	47	39	22	23	13	21	26	13	21	17	18	10	18	5	5	1	12	5	13	27	27	7	16	21	19	47	12	39	20	27	11	55	23	35	54	21	35	54	106	46	233
chr1_60746594_hg38	chr1	60745424	60747763	27	22	59	53	34	33	102	46	45	52	61	88	34	30	71	31	28	55	24	14	3	44	14	62	13	42	14	12	20	17	22	16	18	25	16	18	27	18	21	20	49	37	68	86	51	173
chr1_60833329_hg38	chr1	60832221	60834437	5	17	12	15	28	32	50	41	21	30	35	32	18	14	27	12	1	18	6	11	6	18	10	20	12	27	8	9	22	19	32	9	14	15	10	21	52	29	27	49	6	10	16	17	10	31
chr1_60866517_hg38	chr1	60864158	60868876	21	51	139	19	45	102	126	103	118	47	94	179	42	45	138	41	67	124	79	58	47	132	42	149	24	33	26	74	26	23	38	38	43	46	27	17	46	36	43	52	83	88	86	99	53	168
chr1_60894549_hg38	chr1	60893549	60895549	10	14	27	8	16	33	49	34	30	18	27	25	12	52	34	19	7	30	31	15	24	40	18	36	11	29	10	37	12	18	19	17	23	17	11	16	19	25	13	30	43	60	71	122	76	210
chr1_60897221_hg38	chr1	60896153	60898289	14	20	61	8	3	20	62	35	24	25	29	26	19	25	40	33	2	40	34	27	19	60	12	46	7	7	9	18	14	8	8	8	11	14	5	7	4	4	8	6	33	34	46	39	31	92
chr1_60904188_hg38	chr1	60902567	60905810	36	73	192	32	22	65	118	80	94	62	83	128	61	56	107	80	40	113	92	40	27	128	32	168	27	51	24	29	71	47	44	31	53	57	25	26	62	36	36	41	106	78	108	101	62	174
chr1_60924087_hg38	chr1	60923071	60925103	36	37	71	34	10	48	68	41	35	35	51	40	32	44	38	46	26	57	15	15	10	54	38	54	17	24	14	18	31	53	36	21	27	23	12	19	23	10	19	19	63	51	58	34	27	65
chr1_60970154_hg38	chr1	60967906	60972403	42	146	151	56	110	161	140	122	146	60	148	158	65	102	137	80	78	150	51	38	40	98	76	147	44	57	23	42	75	99	82	56	61	41	64	47	85	58	56	76	104	90	113	173	112	262
chr1_61043347_hg38	chr1	61042163	61044531	96	32	142	119	35	198	183	54	139	206	180	154	179	46	176	158	29	143	99	65	34	84	12	138	37	72	33	17	45	77	57	66	48	66	65	50	63	59	58	77	102	114	123	125	106	215
chr1_61053938_hg38	chr1	61049123	61058752	278	481	966	378	257	702	770	540	1042	577	1136	1108	669	649	1121	635	418	947	916	1096	383	708	193	1051	279	417	271	193	325	484	432	321	440	326	355	253	483	268	319	284	389	359	455	441	272	776
chr1_61080610_hg38	chr1	61075530	61085689	177	788	1312	273	579	1368	723	729	1506	383	1549	1370	508	915	1520	498	503	1212	1190	1337	366	673	275	1291	402	451	534	380	506	538	773	402	1031	371	560	347	644	388	763	492	532	444	620	998	494	1402
chr1_61090432_hg38	chr1	61087113	61093751	41	497	367	41	396	453	403	373	452	111	381	447	181	449	405	143	231	398	710	641	264	287	143	401	148	121	176	177	186	141	265	132	284	111	125	95	226	129	247	178	284	217	264	620	245	669
chr1_61124182_hg38	chr1	61121497	61126866	43	360	298	76	342	352	502	337	515	102	383	442	181	345	482	151	214	352	414	187	165	212	108	290	109	144	111	118	102	124	182	95	199	65	111	122	234	111	180	171	171	175	202	389	205	447
chr1_61175178_hg38	chr1	61169390	61180966	152	338	351	127	380	534	653	441	595	195	405	580	274	392	539	279	302	396	1194	789	476	334	167	374	126	189	274	349	164	166	258	138	191	151	121	155	286	154	196	211	168	185	268	332	169	475
chr1_61186519_hg38	chr1	61182576	61190462	161	597	609	189	449	505	732	539	947	253	755	789	388	689	858	406	418	673	792	795	392	510	213	710	242	278	266	268	253	322	381	216	473	153	285	181	422	242	386	329	407	381	505	848	444	1009
chr1_61198402_hg38	chr1	61196280	61200524	32	104	79	51	81	96	189	143	144	64	144	156	95	205	136	89	51	101	425	504	242	97	61	105	36	45	92	93	42	44	59	29	47	39	30	28	75	44	52	56	42	60	93	102	60	180
chr1_61241716_hg38	chr1	61240719	61242712	5	66	49	21	42	39	128	74	89	36	61	66	24	53	71	29	14	43	154	49	34	41	16	39	28	32	36	59	29	26	20	9	34	21	27	17	45	18	29	38	34	30	28	38	48	72
chr1_61271558_hg38	chr1	61267093	61276023	45	356	213	95	363	307	613	473	551	144	426	508	200	473	421	172	248	289	568	660	307	227	130	301	139	136	158	175	123	86	175	77	148	83	122	104	209	127	169	144	149	226	249	378	224	556
chr1_61278142_hg38	chr1	61276449	61279834	37	79	74	46	99	98	204	127	167	48	129	130	118	178	138	86	52	89	346	390	121	85	35	109	23	41	47	62	28	23	48	21	33	27	26	25	44	27	44	41	45	52	72	66	39	95
chr1_61282067_hg38	chr1	61280287	61283847	21	71	45	28	52	52	120	69	69	32	57	61	73	96	65	29	59	42	302	178	134	46	22	56	21	23	46	78	22	12	33	17	23	19	19	7	50	21	18	33	30	27	58	48	32	93
chr1_61286148_hg38	chr1	61284103	61288192	20	91	66	37	102	98	159	136	133	53	105	97	64	121	112	61	68	78	311	250	146	64	41	67	28	45	61	71	30	29	44	31	47	26	35	33	66	41	43	52	41	27	57	77	47	107
chr1_61336874_hg38	chr1	61334000	61339748	47	119	180	54	127	182	324	209	249	94	219	276	140	173	222	133	97	185	144	80	110	165	72	211	72	125	76	52	102	95	129	90	111	95	92	72	169	88	99	103	174	175	210	238	132	314
chr1_61404096_hg38	chr1	61403095	61405098	12	25	27	14	28	42	74	61	36	24	40	50	23	40	32	18	9	31	38	11	10	31	14	33	13	36	16	15	13	12	25	6	8	21	9	9	29	18	20	21	18	12	20	30	23	31
chr1_61411912_hg38	chr1	61410696	61413128	11	45	39	20	64	50	121	36	101	34	52	83	59	43	85	33	47	50	37	12	15	39	28	41	18	14	18	13	19	9	14	10	26	21	12	14	24	15	13	26	15	17	21	20	23	36
chr1_61437018_hg38	chr1	61436019	61438018	20	47	49	16	26	49	93	42	68	34	47	45	52	53	64	52	44	58	61	29	25	44	28	52	20	33	31	20	47	25	30	24	30	43	20	25	36	33	12	25	19	43	43	37	18	65
chr1_61450181_hg38	chr1	61445292	61455070	103	258	309	83	184	280	482	297	307	148	413	321	204	288	276	221	140	311	352	209	166	272	108	253	96	192	119	119	119	117	144	131	121	134	87	91	243	130	92	129	219	204	258	298	170	461
chr1_61570258_hg38	chr1	61568924	61571593	11	24	27	21	57	50	89	43	33	24	22	23	27	43	32	10	19	15	11	4	7	15	13	17	25	22	13	9	17	14	43	14	31	15	12	16	30	28	32	30	10	12	11	15	9	15
chr1_61589129_hg38	chr1	61588116	61590142	27	18	38	11	10	29	20	30	25	20	19	43	26	15	20	18	12	26	10	9	4	24	16	23	13	24	12	14	12	15	12	12	16	19	12	6	26	12	10	22	21	18	22	16	16	46
chr1_61641212_hg38	chr1	61639565	61642859	45	66	168	46	28	75	110	72	73	50	78	75	48	53	65	58	60	111	39	16	12	80	37	118	20	61	30	15	54	48	61	33	36	27	27	16	45	25	17	53	91	67	95	98	72	172
chr1_61645324_hg38	chr1	61644124	61646525	18	56	118	5	8	22	52	12	19	10	14	18	14	10	23	37	19	42	15	2	15	34	40	63	7	16	11	8	36	36	15	12	31	18	7	10	10	11	14	13	28	31	27	17	11	29
chr1_61725156_hg38	chr1	61724035	61726277	117	165	261	126	90	195	252	116	220	171	217	198	208	175	219	188	107	188	364	123	77	171	61	223	65	89	73	64	79	136	97	68	89	63	75	53	102	71	61	72	129	118	119	141	83	274
chr1_61742097_hg38	chr1	61739547	61744647	206	165	539	226	74	269	449	142	337	352	355	317	325	169	407	333	149	341	1052	305	184	317	67	458	84	189	173	174	161	269	193	168	171	163	162	136	157	127	136	159	215	162	180	135	77	232
chr1_61869848_hg38	chr1	61868569	61871128	19	16	12	10	3	11	13	21	11	9	4	6	7	15	8	13	42	18	134	125	39	19	6	17	8	16	37	63	22	21	23	14	17	23	7	12	19	17	9	19	27	28	33	19	8	31
chr1_61978422_hg38	chr1	61974104	61982741	21	27	64	23	32	22	100	55	29	24	36	53	36	43	32	32	34	26	841	629	418	64	23	26	16	22	183	232	33	34	32	15	25	58	25	19	34	24	18	21	36	60	28	34	29	93
chr1_62025479_hg38	chr1	62024462	62026496	4	18	21	19	20	24	36	23	17	14	15	28	18	20	20	13	13	25	290	142	110	30	16	28	5	18	86	74	17	12	15	5	11	21	7	5	16	5	5	4	12	11	15	7	6	18
chr1_62048986_hg38	chr1	62043790	62054183	28	44	45	19	20	38	73	37	25	28	55	42	37	46	29	27	36	30	1436	1254	671	55	20	37	17	33	398	408	35	44	24	32	45	48	30	25	32	31	13	31	33	30	31	24	14	36
chr1_62068930_hg38	chr1	62067112	62070747	14	61	74	11	24	21	57	41	24	14	44	32	25	31	34	25	61	30	1020	378	190	73	33	34	7	32	260	185	40	18	20	15	21	33	19	17	18	14	7	17	24	20	21	18	16	28
chr1_62077892_hg38	chr1	62076466	62079319	14	57	36	27	72	65	75	31	52	18	49	68	45	62	45	29	21	38	84	95	57	36	11	45	8	8	43	37	14	6	16	7	15	21	9	8	14	10	10	13	10	13	10	28	5	37
chr1_62110593_hg38	chr1	62109595	62111591	6	34	23	9	8	21	22	15	7	9	19	12	13	8	7	2	1	14	157	61	41	19	9	20	5	17	55	66	14	16	6	15	9	15	12	8	18	12	8	6	24	29	32	18	11	25
chr1_62143495_hg38	chr1	62141708	62145282	44	65	59	18	18	61	73	43	43	26	41	58	37	23	41	23	7	47	293	95	133	40	19	51	21	24	62	68	58	28	19	28	25	31	20	10	28	32	14	29	9	12	21	26	9	34
chr1_62283180_hg38	chr1	62281765	62284594	14	33	22	44	25	72	92	64	83	30	36	26	54	46	105	18	15	16	36	19	14	20	6	11	19	41	24	10	27	18	34	18	22	25	31	28	42	36	18	35	21	17	25	37	17	58
chr1_62300659_hg38	chr1	62298378	62302940	35	57	57	67	91	161	98	69	69	56	104	116	42	50	53	59	76	76	69	19	33	47	40	45	36	56	100	74	68	51	64	34	56	50	31	29	94	53	38	80	50	51	80	197	82	210
chr1_62319029_hg38	chr1	62317822	62320236	23	16	66	90	16	127	47	4	31	81	66	89	51	9	44	39	5	63	39	12	10	25	6	25	14	25	35	19	35	35	40	27	38	39	22	16	27	25	21	26	27	22	47	110	36	93
chr1_62360861_hg38	chr1	62358838	62362884	24	16	32	36	11	48	29	10	19	25	21	25	27	10	21	24	20	16	155	155	59	14	10	12	8	17	24	24	24	13	16	7	13	15	9	8	20	19	9	13	8	18	12	16	9	21
chr1_62384844_hg38	chr1	62383488	62386199	11	46	29	35	52	87	93	54	52	52	69	72	47	51	53	37	57	67	22	12	5	22	15	30	15	30	10	14	19	20	27	17	13	27	15	23	41	29	11	32	32	44	46	129	62	133
chr1_62458068_hg38	chr1	62457036	62459101	27	31	35	29	16	16	63	34	33	45	31	32	55	42	30	22	24	25	23	10	5	17	15	20	10	18	13	17	12	15	11	9	13	14	11	10	9	9	12	28	19	21	21	20	14	30
chr1_62784255_hg38	chr1	62782732	62785778	78	200	475	103	117	343	275	162	444	130	456	357	163	176	453	168	131	380	334	166	76	185	80	336	130	126	185	112	172	207	218	163	270	103	161	134	164	150	200	147	226	157	219	360	179	499
chr1_62793178_hg38	chr1	62788416	62797940	113	336	179	276	320	341	883	316	485	353	460	401	522	660	368	227	281	275	50	85	48	192	115	271	78	68	27	20	71	62	112	56	113	32	76	53	96	45	91	94	164	232	242	659	375	777
chr1_62840525_hg38	chr1	62839525	62841525	4	48	26	23	31	34	108	41	43	21	32	34	37	47	28	24	16	33	5	10	7	22	4	25	28	6	6	7	11	21	24	29	21	10	14	18	22	22	22	23	19	14	26	55	30	74
chr1_62875280_hg38	chr1	62872556	62878005	24	73	54	57	146	111	275	150	155	55	130	94	94	108	119	59	83	88	33	20	10	58	34	81	48	52	17	25	47	49	79	38	65	28	55	52	98	57	68	102	75	80	90	194	114	243
chr1_62882576_hg38	chr1	62881576	62883576	6	12	13	16	24	25	48	27	14	15	15	16	23	28	13	6	15	13	6	1	0	11	4	8	10	14	1	7	10	7	12	10	13	5	18	7	22	18	22	26	10	7	12	27	20	44
chr1_62892188_hg38	chr1	62890954	62893422	9	29	20	19	46	39	90	76	53	34	33	35	32	27	56	22	31	26	10	1	0	17	23	27	33	34	10	16	26	39	57	19	31	12	29	26	21	33	28	49	6	7	8	16	4	14
chr1_63074192_hg38	chr1	63072927	63075458	27	23	33	86	34	75	133	46	107	118	75	84	93	73	102	59	61	46	13	11	5	49	14	50	23	58	13	20	35	33	55	31	32	30	30	24	51	29	22	41	28	44	61	62	41	137
chr1_63088261_hg38	chr1	63087147	63089375	4	22	27	17	26	32	63	28	38	21	41	35	25	45	34	17	26	25	12	5	8	17	10	23	8	20	3	9	12	8	16	6	13	7	5	2	10	14	8	18	23	37	26	41	17	81
chr1_63124252_hg38	chr1	63121256	63127249	23	92	63	43	171	122	256	145	160	65	111	141	85	129	192	57	97	108	15	3	6	44	40	101	61	43	24	23	47	45	99	36	53	34	47	35	107	43	75	60	68	89	99	225	106	255
chr1_63134992_hg38	chr1	63133628	63136355	3	83	31	24	78	56	122	99	81	25	80	78	36	33	64	30	32	55	7	4	0	49	29	51	37	23	10	11	23	12	54	19	27	15	34	26	52	19	39	48	22	27	42	107	58	134
chr1_63367527_hg38	chr1	63365797	63369257	139	66	262	180	47	220	291	59	268	319	251	249	276	120	234	221	55	188	435	110	68	131	27	188	59	77	72	54	85	92	109	72	104	73	84	53	89	67	91	84	102	118	114	155	83	230
chr1_63523720_hg38	chr1	63521902	63525537	99	215	544	90	143	521	283	174	385	118	408	389	143	134	419	183	195	371	572	191	74	232	81	353	112	103	152	119	180	194	169	98	181	102	154	81	113	90	115	106	230	149	165	180	87	280
chr1_63593592_hg38	chr1	63591751	63595434	153	145	522	187	77	319	266	95	272	295	319	315	265	84	353	252	53	334	645	171	69	216	41	365	48	126	153	94	136	222	111	121	100	125	91	95	140	117	66	98	178	148	159	160	105	257
chr1_63620033_hg38	chr1	63615822	63624244	74	153	161	58	71	106	206	149	136	89	152	170	75	95	142	125	83	131	529	358	363	112	52	145	22	42	108	59	70	49	34	38	33	60	35	26	70	43	31	48	48	65	95	89	60	150
chr1_63675057_hg38	chr1	63673550	63676564	43	49	110	20	35	43	81	42	80	36	50	72	39	42	86	63	44	89	32	28	35	57	18	97	32	52	27	23	53	77	68	43	48	51	27	33	46	49	33	58	23	17	27	20	17	44
chr1_63691532_hg38	chr1	63690192	63692872	27	59	50	12	32	42	86	46	43	17	37	38	36	32	47	40	38	54	27	7	15	59	14	68	11	10	12	19	13	12	29	15	17	18	10	10	17	15	13	15	12	15	13	12	10	15
chr1_63698742_hg38	chr1	63697278	63700207	58	123	120	106	176	140	202	87	231	95	120	169	143	188	225	95	88	107	23	7	18	56	42	114	40	45	21	18	37	38	49	30	49	28	32	39	62	38	55	65	15	7	28	25	15	65
chr1_63730532_hg38	chr1	63729263	63731802	46	82	85	9	10	17	65	29	35	11	23	16	44	39	41	28	24	48	36	23	24	54	24	63	11	21	10	18	18	16	19	14	16	21	18	8	17	13	9	7	21	14	21	6	9	16
chr1_63792690_hg38	chr1	63789539	63795842	50	106	127	32	74	58	129	93	117	51	79	98	92	156	93	53	43	65	151	258	316	59	36	56	12	48	60	145	55	37	35	31	39	56	19	28	54	34	15	21	27	30	38	26	19	44
chr1_63814077_hg38	chr1	63812946	63815208	30	55	51	15	38	39	129	49	108	25	48	75	66	53	85	37	27	51	17	11	24	36	24	64	6	22	10	16	18	15	11	12	18	22	12	15	18	6	9	17	26	32	22	14	12	25
chr1_63847140_hg38	chr1	63845993	63848287	29	74	51	41	77	67	145	70	145	67	62	89	62	109	126	52	62	66	23	32	38	51	29	54	5	23	17	25	10	20	17	23	16	22	12	20	17	22	18	38	7	9	13	12	3	29
chr1_63883102_hg38	chr1	63881019	63885184	46	154	84	41	114	65	333	140	148	73	138	148	132	124	135	103	97	84	127	70	75	108	33	86	9	33	38	56	37	25	28	30	22	41	10	21	36	21	20	39	19	18	30	18	13	28
chr1_63892857_hg38	chr1	63891391	63894323	36	149	117	54	113	83	278	149	188	66	141	159	116	134	174	80	90	130	320	134	124	98	41	109	9	42	37	50	17	37	22	24	20	35	15	17	43	17	14	25	24	33	46	38	18	47
chr1_63909714_hg38	chr1	63907762	63911665	32	74	71	57	73	70	229	80	145	110	82	114	107	129	162	82	58	104	43	118	161	64	48	91	24	50	20	33	32	36	41	21	28	42	23	27	55	40	21	47	18	21	32	27	20	48
chr1_63916050_hg38	chr1	63912902	63919197	36	80	104	53	63	68	185	118	144	72	63	122	141	140	139	71	16	94	449	380	309	61	28	70	18	37	59	207	42	24	43	36	27	52	18	32	40	42	18	47	20	34	38	28	22	33
chr1_63969374_hg38	chr1	63968198	63970550	19	34	55	14	41	36	86	51	90	29	60	69	37	33	106	24	50	58	20	2	20	29	23	54	9	17	11	12	6	20	10	7	14	5	6	21	4	15	4	20	9	10	9	7	6	9
chr1_63983949_hg38	chr1	63982486	63985412	28	109	101	24	90	53	164	47	97	20	77	93	56	70	84	38	33	65	18	20	8	50	22	47	14	28	10	8	41	16	31	23	17	28	17	39	39	33	20	49	9	24	19	9	12	21
chr1_64006638_hg38	chr1	64005634	64007643	25	42	77	17	42	27	73	32	78	37	49	59	34	26	57	20	19	40	93	52	46	32	19	52	5	14	31	39	23	14	17	16	8	17	13	12	18	15	4	19	5	10	15	12	4	15
chr1_64040666_hg38	chr1	64036934	64044397	130	514	399	135	307	229	1012	314	804	244	414	476	371	392	662	289	291	398	205	149	221	305	135	369	84	132	58	82	114	171	148	110	159	119	87	107	294	123	119	187	26	32	40	37	31	73
chr1_64046874_hg38	chr1	64045880	64047867	33	69	52	14	76	40	158	71	114	39	86	92	76	75	79	55	74	59	20	15	33	43	25	46	19	46	11	12	34	39	32	27	37	23	20	36	71	37	24	59	15	22	19	28	14	59
chr1_64072628_hg38	chr1	64070580	64074676	78	207	131	74	159	125	413	204	307	108	201	210	196	214	267	171	201	156	68	50	98	144	96	165	46	68	21	28	44	57	94	35	72	47	51	69	104	54	55	103	32	43	59	34	35	97
chr1_64077331_hg38	chr1	64075309	64079353	41	175	102	85	194	135	334	179	293	130	235	211	169	209	214	112	108	160	23	35	39	101	83	171	50	65	20	29	59	61	99	46	88	54	50	68	122	74	71	112	21	31	47	35	33	124
chr1_64133452_hg38	chr1	64132312	64134592	26	58	41	38	51	28	86	41	114	30	59	55	68	105	106	38	37	51	10	19	35	32	20	38	7	16	16	11	24	20	22	21	10	15	9	17	14	15	14	29	7	10	18	16	12	26
chr1_64136942_hg38	chr1	64135821	64138062	17	60	46	30	72	42	139	56	88	27	66	77	58	74	89	51	62	65	13	4	12	39	33	68	8	28	7	13	15	16	23	14	36	15	17	13	30	13	20	29	12	10	19	16	12	26
chr1_64155416_hg38	chr1	64154262	64156571	18	75	36	24	80	45	129	55	72	28	73	41	65	51	64	24	48	50	9	4	11	46	20	36	8	19	8	13	10	12	24	19	21	14	14	22	35	21	20	30	8	6	9	9	3	13
chr1_64163410_hg38	chr1	64161977	64164842	24	58	54	40	65	68	93	50	89	49	61	93	52	89	83	44	44	92	17	12	20	54	30	60	21	38	22	26	35	26	44	20	22	37	13	18	45	28	12	38	28	24	39	20	20	32
chr1_64194775_hg38	chr1	64191593	64197957	55	155	106	127	278	187	300	184	284	142	167	206	171	182	210	117	99	184	54	40	28	124	77	202	30	52	40	35	43	53	43	37	38	68	29	19	50	29	26	41	54	50	73	55	44	117
chr1_64269332_hg38	chr1	64268005	64270659	26	50	40	43	26	63	57	41	54	28	45	60	42	37	52	39	18	52	27	15	9	49	23	60	12	18	8	10	21	19	29	12	13	23	15	8	18	14	11	23	14	25	21	19	16	40
chr1_64309392_hg38	chr1	64307984	64310801	42	96	86	119	102	154	153	139	197	92	142	189	104	156	172	74	83	127	17	8	8	54	54	91	15	48	22	14	25	22	37	16	32	18	23	28	45	24	31	28	9	13	29	18	6	34
chr1_64363505_hg38	chr1	64362423	64364587	6	24	23	10	46	57	87	63	44	8	49	37	34	31	48	24	20	24	13	3	2	28	18	30	20	21	10	12	12	10	19	14	26	11	18	23	37	12	19	38	7	5	15	11	2	11
chr1_64471768_hg38	chr1	64469202	64474333	79	57	269	87	19	186	249	94	314	193	278	322	157	101	412	213	62	242	39	12	11	216	39	296	34	131	53	35	121	135	96	97	89	159	103	72	100	114	52	85	72	75	76	83	54	168
chr1_64506342_hg38	chr1	64504271	64508414	57	47	80	41	22	42	160	123	104	106	98	111	75	107	152	97	45	109	41	31	21	127	44	163	24	51	26	24	31	45	28	45	33	50	32	19	60	45	20	31	33	58	49	36	30	83
chr1_64537120_hg38	chr1	64536118	64538121	14	13	16	3	7	14	68	42	45	15	32	28	23	22	52	17	22	25	5	0	5	26	4	15	7	12	14	10	12	12	15	14	10	21	8	14	34	18	5	14	4	6	6	4	8	16
chr1_64540029_hg38	chr1	64538546	64541512	12	41	52	11	25	37	122	98	100	21	74	59	41	49	123	34	30	58	26	9	11	78	19	55	16	55	18	13	18	40	38	30	26	55	25	8	36	42	22	22	20	34	16	23	24	58
chr1_64597408_hg38	chr1	64595638	64599178	9	37	47	14	14	19	108	83	73	27	75	83	29	28	96	31	30	45	19	2	7	63	14	69	14	29	20	15	23	13	16	19	14	37	10	6	38	30	11	25	25	26	32	21	19	41
chr1_64663781_hg38	chr1	64662632	64664930	19	23	41	29	13	32	90	64	33	42	34	51	45	59	50	60	13	53	8	19	4	50	12	63	5	39	14	7	18	28	22	13	26	26	11	6	25	17	7	26	18	38	47	37	34	61
chr1_64682536_hg38	chr1	64681214	64683857	18	34	20	11	24	24	111	81	55	39	40	61	49	39	75	54	29	62	35	10	8	60	20	79	11	34	13	13	23	21	20	22	20	26	15	7	21	18	10	26	16	13	24	34	27	60
chr1_64688494_hg38	chr1	64687145	64689844	22	35	91	13	17	47	87	88	71	20	54	69	47	55	100	53	11	78	21	6	11	54	26	79	16	41	34	34	25	37	32	29	23	52	17	13	35	22	21	28	22	23	35	32	15	61
chr1_64745562_hg38	chr1	64743304	64747821	117	67	305	104	41	127	220	64	200	198	242	228	184	65	227	184	67	220	610	333	93	201	34	254	46	130	154	109	126	174	99	125	108	106	78	70	123	119	59	92	93	74	86	74	72	162
chr1_64839934_hg38	chr1	64838677	64841190	47	42	61	26	25	38	70	44	35	52	64	61	39	36	56	46	33	56	150	120	56	59	11	70	28	29	77	37	47	42	41	25	43	44	31	15	45	38	25	37	24	33	47	38	29	80
chr1_64848790_hg38	chr1	64844108	64853473	119	103	164	132	85	185	223	161	133	216	233	153	190	220	160	172	109	193	773	970	440	160	86	188	55	128	298	106	117	138	118	108	110	136	62	53	147	88	67	98	89	127	213	171	147	557
chr1_64856002_hg38	chr1	64854220	64857783	25	24	39	21	16	33	47	46	30	32	29	31	22	40	29	33	53	39	273	270	114	19	8	42	13	26	81	30	29	41	28	28	21	27	15	13	23	13	12	20	32	45	63	41	49	221
chr1_64934009_hg38	chr1	64932509	64935509	44	111	191	30	47	87	110	98	78	34	100	70	39	74	92	61	89	96	43	26	24	83	40	82	26	53	36	24	63	55	50	44	42	53	31	17	70	67	36	60	34	38	43	62	36	135
chr1_64956837_hg38	chr1	64955513	64958161	38	51	65	30	38	89	131	60	81	48	106	66	47	53	73	55	88	72	54	27	29	64	35	54	26	42	36	25	57	52	39	26	47	37	29	21	59	46	27	51	40	35	37	46	33	117
chr1_64966832_hg38	chr1	64964527	64969138	181	147	457	223	73	355	358	120	397	335	391	418	361	184	407	347	110	361	436	126	73	269	45	366	84	96	92	78	137	137	120	66	110	89	117	49	127	89	103	89	125	108	164	198	93	304
chr1_64987458_hg38	chr1	64986351	64988566	20	71	45	40	44	84	136	51	108	41	73	83	42	63	87	43	57	62	18	9	9	38	19	59	27	23	12	11	12	23	25	15	25	19	30	9	31	19	14	36	19	15	29	55	28	104
chr1_65002634_hg38	chr1	65000635	65004633	92	127	461	129	71	272	197	84	291	182	261	256	182	143	357	152	58	320	98	97	59	178	50	288	21	66	63	30	92	108	52	62	62	47	39	51	71	62	35	52	75	53	89	84	32	161
chr1_65027700_hg38	chr1	65026654	65028747	26	36	103	15	25	53	58	45	38	22	35	41	31	27	53	31	43	47	13	15	15	45	16	84	13	29	21	8	54	21	39	21	15	27	21	15	27	11	20	26	12	11	17	10	8	44
chr1_65066686_hg38	chr1	65061332	65072039	295	558	1290	414	344	1077	845	421	1238	493	1260	1099	564	507	1290	635	356	986	1717	734	310	657	178	994	195	297	372	274	311	434	396	247	478	243	354	224	369	262	365	320	323	225	399	459	258	814
chr1_65148816_hg38	chr1	65146123	65151509	130	113	461	164	82	375	316	99	286	262	257	275	260	66	316	223	84	339	960	323	133	212	36	338	61	161	252	185	155	196	133	104	127	139	119	91	130	120	102	146	139	124	139	134	75	232
chr1_65176150_hg38	chr1	65172382	65179919	77	162	187	37	56	86	191	137	85	58	92	82	77	80	138	120	73	155	1119	459	379	152	70	158	33	79	293	306	104	115	77	65	72	111	47	26	70	50	43	46	172	104	128	96	55	90
chr1_65196214_hg38	chr1	65194466	65197961	19	48	54	16	25	38	54	32	16	13	20	24	26	26	21	17	33	39	322	217	114	38	17	42	6	18	109	96	26	32	14	15	13	35	18	6	24	15	16	18	30	30	46	19	9	24
chr1_65255381_hg38	chr1	65252386	65258376	186	479	874	277	418	1029	573	342	1224	348	941	950	482	757	1104	474	326	769	558	281	174	378	155	687	259	253	244	168	347	355	521	222	662	176	375	234	406	244	491	431	268	201	298	643	294	971
chr1_65309799_hg38	chr1	65308000	65311598	65	113	224	59	90	164	193	65	202	82	178	127	133	149	200	110	95	168	390	230	69	131	29	149	70	69	130	83	115	132	138	91	147	69	104	77	142	89	122	124	126	68	106	249	97	306
chr1_65321280_hg38	chr1	65317113	65325446	94	335	342	211	440	664	632	235	730	165	509	616	287	251	611	299	209	473	323	109	125	252	130	444	245	202	124	86	248	205	362	155	415	123	235	175	295	215	332	386	287	294	475	1070	557	1650
chr1_65387120_hg38	chr1	65386116	65388125	25	43	55	10	43	57	71	48	29	23	45	33	27	27	43	19	10	38	219	40	52	29	11	44	15	17	42	71	31	15	34	15	33	20	15	12	37	18	22	34	31	21	39	63	17	74
chr1_65389499_hg38	chr1	65388499	65390499	17	38	44	18	38	71	68	36	32	33	43	39	21	28	43	31	15	41	125	37	36	39	10	37	23	38	44	75	48	26	39	17	39	24	26	31	49	33	38	62	32	31	37	61	24	63
chr1_65396465_hg38	chr1	65395471	65397459	17	22	39	24	44	54	73	27	37	35	59	34	33	13	30	31	12	36	26	12	7	43	17	37	29	28	21	12	46	29	69	20	57	17	33	23	41	24	36	45	35	29	38	78	56	101
chr1_65431088_hg38	chr1	65429020	65433155	32	120	132	57	148	178	194	99	142	72	133	118	95	118	130	83	124	148	28	9	8	85	50	125	71	67	20	26	95	77	120	60	104	81	69	54	125	85	92	124	53	73	62	137	64	161
chr1_65459371_hg38	chr1	65458298	65460444	13	20	25	28	50	39	64	25	62	20	29	41	27	23	49	22	17	27	13	5	9	24	17	28	27	26	10	11	14	21	43	14	37	21	32	25	54	26	39	42	4	12	7	21	15	27
chr1_65525696_hg38	chr1	65524479	65526913	40	25	72	36	19	61	58	26	54	79	67	48	66	39	64	59	13	63	16	16	6	56	22	67	51	54	26	12	56	54	61	49	55	48	54	36	76	59	53	80	10	23	18	24	20	34
chr1_65554770_hg38	chr1	65553756	65555784	31	60	49	7	7	19	24	13	10	17	20	12	17	17	20	41	27	29	5	4	3	29	21	28	7	13	19	16	13	17	11	12	17	16	11	4	9	11	7	10	26	23	23	9	4	13
chr1_65572880_hg38	chr1	65571861	65573899	6	17	15	13	10	28	25	9	11	2	15	13	8	12	10	6	17	17	5	2	2	12	3	15	17	13	9	9	14	15	34	11	23	17	16	14	18	19	38	33	5	6	4	6	7	14
chr1_65690103_hg38	chr1	65686992	65693214	84	273	229	118	251	391	335	220	473	112	374	491	152	303	428	176	204	338	74	46	76	138	132	278	116	135	65	47	161	131	251	98	236	88	160	99	248	110	241	182	43	55	80	128	66	231
chr1_65793036_hg38	chr1	65791707	65794365	23	28	177	45	12	92	56	30	121	85	71	78	73	19	134	66	23	130	82	38	32	66	9	158	24	33	142	54	92	86	65	51	68	64	42	27	21	32	34	21	89	74	93	59	34	64
chr1_65812656_hg38	chr1	65811372	65813939	17	31	40	6	19	27	67	62	38	17	41	28	19	19	33	13	6	21	118	47	56	33	9	28	12	13	56	30	21	17	12	14	9	11	8	5	18	7	9	23	11	13	7	11	5	9
chr1_65949322_hg38	chr1	65948188	65950456	10	91	79	25	68	113	103	38	123	27	59	96	22	18	112	40	30	75	14	2	9	30	34	69	6	13	19	12	12	10	23	9	10	13	7	6	8	10	8	5	15	14	16	18	13	31
chr1_65955533_hg38	chr1	65954400	65956666	10	110	63	26	95	66	134	69	94	25	66	86	29	31	86	31	90	43	7	2	21	30	33	65	37	25	14	16	17	23	44	11	32	15	28	12	55	27	34	59	16	27	24	20	15	30
chr1_65960088_hg38	chr1	65958962	65961213	9	134	82	32	137	109	155	93	169	23	117	143	56	120	145	52	77	88	16	4	13	48	32	94	38	19	18	13	36	21	47	14	45	24	27	21	39	26	43	43	44	49	64	103	56	119
chr1_65964042_hg38	chr1	65961570	65966513	49	403	297	67	408	406	494	343	680	114	485	535	168	389	532	192	365	360	38	22	70	205	116	346	130	102	67	28	131	125	200	73	229	44	145	80	218	124	206	160	102	151	168	307	178	381
chr1_65975966_hg38	chr1	65974911	65977020	10	84	49	38	64	88	77	55	149	45	79	153	44	97	113	32	39	100	7	6	18	21	26	62	21	8	9	12	15	12	30	8	26	11	16	9	21	18	24	25	28	20	42	65	34	96
chr1_65978977_hg38	chr1	65977092	65980862	24	266	201	44	279	256	329	224	365	56	284	333	108	217	311	96	119	230	34	14	21	114	80	206	59	34	53	37	57	41	100	21	104	29	65	27	80	34	96	61	113	105	115	214	161	243
chr1_65983612_hg38	chr1	65981814	65985410	15	136	90	36	169	140	166	118	196	44	106	176	63	198	167	55	100	104	8	13	29	44	49	95	36	19	26	16	35	22	60	20	52	16	29	19	48	30	60	38	39	45	73	104	56	121
chr1_65992034_hg38	chr1	65990041	65994027	23	199	266	41	256	337	251	161	477	76	313	404	91	214	407	112	141	317	37	14	11	161	62	262	120	69	78	27	97	100	192	78	255	76	161	89	159	89	210	119	158	152	167	333	157	408
chr1_65999172_hg38	chr1	65997860	66000485	15	129	88	18	143	151	178	100	170	36	120	169	57	112	131	49	88	102	24	14	22	69	32	99	54	56	47	31	58	45	89	47	82	38	67	47	70	62	85	92	60	62	88	165	81	238
chr1_66050603_hg38	chr1	66046599	66054607	36	372	208	80	377	274	539	254	345	127	282	255	164	222	324	122	221	188	43	10	21	152	117	205	96	89	45	36	101	75	134	54	170	62	92	72	118	81	169	158	138	155	223	507	255	626
chr1_66058438_hg38	chr1	66057380	66059495	17	36	21	26	40	56	59	40	58	32	39	45	49	44	72	36	40	28	9	3	3	26	24	44	18	16	14	12	13	18	26	9	27	14	14	12	19	9	23	22	30	36	66	83	52	128
chr1_66133754_hg38	chr1	66132687	66134820	19	103	73	32	130	86	164	99	138	43	130	104	53	53	135	67	40	65	20	1	2	71	23	69	44	37	20	8	47	34	56	22	59	23	31	15	46	33	53	46	44	53	69	127	74	169
chr1_66143267_hg38	chr1	66142015	66144519	8	84	55	23	105	125	160	102	145	52	101	116	33	40	126	52	105	77	18	3	7	51	44	76	39	30	15	9	36	26	55	19	52	23	41	35	69	43	34	41	36	58	98	173	88	250
chr1_66154910_hg38	chr1	66151434	66158385	39	425	275	92	425	530	768	373	807	155	558	664	211	357	588	220	361	390	51	14	32	229	145	391	184	147	60	46	152	127	251	104	277	64	194	116	265	109	266	210	268	297	391	800	435	1201
chr1_66169012_hg38	chr1	66167500	66170525	9	115	125	37	123	119	181	91	175	54	136	131	58	58	191	67	60	85	24	3	12	89	37	105	66	54	26	20	77	47	78	41	78	30	54	35	86	52	78	76	124	94	142	326	154	320
chr1_66176206_hg38	chr1	66173776	66178636	48	140	128	63	158	189	254	119	226	64	178	205	103	132	202	89	60	148	22	13	218	102	49	151	82	63	39	33	69	65	104	58	100	41	64	67	131	64	101	122	122	183	241	390	211	470
chr1_66182984_hg38	chr1	66181875	66184092	16	80	92	19	71	76	186	71	112	31	76	67	54	44	106	44	75	76	12	7	7	55	29	51	34	50	16	11	58	56	67	31	54	28	32	47	77	33	42	64	102	98	105	215	117	227
chr1_66244226_hg38	chr1	66239880	66248573	128	533	606	164	529	714	890	490	1002	224	785	861	342	597	921	387	404	598	136	71	127	409	218	591	247	183	126	76	285	271	393	197	437	149	269	163	380	191	336	291	368	405	592	1051	488	1455
chr1_66272138_hg38	chr1	66270886	66273390	63	206	308	57	153	223	221	192	235	114	243	200	111	215	284	111	119	197	32	24	32	176	75	190	68	84	37	26	109	129	109	83	111	61	80	53	121	63	89	104	154	137	138	169	109	289
chr1_66277342_hg38	chr1	66274249	66280434	107	454	493	105	399	572	659	394	594	184	548	609	251	436	583	255	337	483	87	30	39	361	155	509	193	195	76	43	263	208	299	162	322	155	235	139	302	174	274	244	305	319	366	498	235	753
chr1_66282108_hg38	chr1	66281109	66283106	19	101	103	32	154	137	196	136	128	40	109	132	61	43	110	41	72	81	13	2	3	87	42	89	53	75	26	17	61	55	72	43	74	40	60	49	101	53	76	82	64	71	95	98	69	192
chr1_66301346_hg38	chr1	66300344	66302347	13	85	64	19	80	108	135	101	91	40	92	81	55	79	102	40	90	53	17	1	11	50	29	60	50	70	21	11	56	55	81	47	84	48	87	50	104	60	70	93	34	34	55	82	48	159
chr1_66328872_hg38	chr1	66327806	66329937	32	60	49	39	68	82	110	80	73	36	89	85	53	109	86	40	48	50	1	6	4	36	23	52	27	38	25	13	39	39	57	43	45	34	43	35	75	43	30	60	40	31	96	80	53	164
chr1_66334764_hg38	chr1	66331083	66338444	129	555	644	129	319	465	598	476	549	272	681	593	277	524	632	290	351	532	94	55	44	462	162	554	193	223	88	48	252	245	239	205	246	188	236	169	302	221	202	209	420	346	443	464	258	713
chr1_66372714_hg38	chr1	66370501	66374927	93	319	288	94	204	225	484	315	286	110	358	268	161	256	301	190	203	193	53	17	20	235	108	249	94	116	42	26	112	110	159	111	164	82	116	94	179	107	132	153	140	110	175	188	91	299
chr1_66402495_hg38	chr1	66401014	66403976	34	103	97	42	129	108	180	108	155	51	123	107	100	127	144	50	62	81	19	4	5	58	42	88	57	77	22	14	77	63	86	53	75	64	76	73	131	56	84	96	112	49	125	178	36	253
chr1_66445470_hg38	chr1	66443641	66447298	31	156	146	48	146	194	295	162	191	84	206	213	108	136	213	108	122	156	46	7	45	127	71	172	61	81	28	37	76	75	91	58	85	60	52	39	104	52	71	92	62	100	102	114	57	200
chr1_66450227_hg38	chr1	66449225	66451229	4	27	30	10	35	18	42	32	27	8	22	30	10	8	25	15	33	27	12	0	4	30	19	26	16	14	9	9	30	21	30	8	23	12	12	10	17	28	15	8	14	20	16	18	8	20
chr1_66464862_hg38	chr1	66463687	66466037	8	15	16	11	27	19	46	23	24	10	16	17	12	12	14	12	22	25	11	4	7	15	9	9	23	24	10	11	23	21	51	11	37	17	25	25	57	25	31	52	4	7	8	16	8	12
chr1_66534655_hg38	chr1	66531706	66537604	135	479	827	157	241	553	469	319	758	224	603	632	283	355	749	299	220	612	381	250	144	376	135	555	131	181	215	114	254	240	256	177	227	146	210	150	229	143	170	184	321	253	218	207	158	291
chr1_66542540_hg38	chr1	66538750	66546329	66	353	360	108	294	395	528	310	543	153	368	470	184	257	485	175	187	374	73	49	45	215	127	353	52	85	47	47	96	83	103	52	71	80	57	63	165	80	64	105	61	71	73	64	48	88
chr1_66556393_hg38	chr1	66555289	66557497	21	74	90	39	62	75	103	61	115	53	75	95	34	45	94	36	54	88	45	11	23	49	27	76	23	30	24	19	32	28	36	23	18	32	18	26	55	21	20	48	37	42	40	27	12	63
chr1_66576998_hg38	chr1	66575915	66578080	9	60	66	33	66	66	110	86	77	23	86	59	60	79	95	42	29	71	22	9	14	42	23	57	22	27	8	15	31	27	34	26	18	25	35	18	47	19	24	56	32	43	46	41	38	53
chr1_66600302_hg38	chr1	66598862	66601742	21	83	80	29	81	96	146	137	101	40	88	85	64	73	141	39	63	78	8	20	10	69	24	81	20	22	14	13	21	18	20	15	16	16	20	19	31	17	23	19	19	37	23	18	27	17
chr1_66643745_hg38	chr1	66641168	66646322	44	124	69	59	155	162	263	129	107	55	102	93	82	127	133	73	52	104	22	21	32	93	37	93	47	40	16	27	55	41	55	25	53	39	27	29	72	34	56	61	66	94	41	62	34	42
chr1_66669451_hg38	chr1	66667832	66671070	10	59	45	34	80	49	213	81	49	66	64	51	78	85	72	42	52	52	19	12	16	48	24	45	12	32	10	15	31	36	32	21	16	22	26	29	55	33	15	43	33	32	17	29	22	23
chr1_66711827_hg38	chr1	66710813	66712841	18	30	37	10	22	28	72	24	31	11	19	11	35	29	50	17	4	43	20	4	5	29	14	48	7	11	10	9	21	6	12	12	7	11	8	13	19	14	6	19	12	22	11	10	8	12
chr1_66725248_hg38	chr1	66723433	66727064	39	97	128	57	89	180	253	102	170	54	97	150	87	73	165	81	98	120	26	8	9	101	40	102	25	63	37	39	53	48	67	47	46	46	48	48	69	39	35	47	77	56	55	55	45	54
chr1_66752427_hg38	chr1	66750836	66754018	135	82	219	118	33	93	152	64	140	145	120	124	121	68	135	109	37	131	40	19	4	106	26	141	19	47	29	12	54	68	56	21	31	39	39	23	41	33	23	32	59	46	52	24	20	53
chr1_66925266_hg38	chr1	66923428	66927105	151	155	557	131	76	390	327	118	473	212	446	367	275	160	458	251	104	402	522	148	68	245	37	394	124	118	133	91	190	177	207	96	204	89	159	98	132	83	160	138	245	152	195	225	111	356
chr1_66930588_hg38	chr1	66928508	66932668	96	146	346	159	108	394	380	147	332	229	344	303	210	148	335	226	79	285	326	123	55	222	54	299	86	131	106	42	146	140	173	101	197	83	138	87	157	100	157	118	157	96	128	219	85	274
chr1_66981748_hg38	chr1	66980300	66983195	13	83	43	45	99	87	185	93	59	39	65	46	54	41	53	33	42	49	34	33	7	50	22	74	14	31	6	11	21	20	28	16	38	12	25	17	48	26	23	37	39	19	17	47	23	36
chr1_67002260_hg38	chr1	67001048	67003473	14	49	48	24	63	65	110	63	46	28	71	67	37	25	54	41	25	49	19	4	9	42	17	41	15	38	15	29	34	30	42	26	40	42	25	19	42	34	25	56	38	34	46	31	20	64
chr1_67005480_hg38	chr1	67004157	67006802	29	42	39	56	98	106	137	73	84	54	98	60	67	80	60	70	81	49	25	13	11	41	34	55	15	30	19	19	23	20	36	14	21	20	24	15	36	21	34	30	26	25	33	27	12	36
chr1_67019732_hg38	chr1	67018732	67020732	17	29	25	7	45	54	89	43	44	21	62	49	15	9	28	16	38	27	21	9	6	37	16	41	23	33	21	16	28	26	39	19	36	26	18	25	47	21	33	56	57	54	62	74	30	111
chr1_67031167_hg38	chr1	67030165	67032169	7	16	14	11	38	44	58	25	17	10	32	25	12	11	26	13	32	14	12	1	2	20	10	15	29	27	11	12	25	16	38	14	22	16	19	15	21	23	38	28	13	11	12	15	8	18
chr1_67053906_hg38	chr1	67052035	67055776	148	145	485	248	86	407	392	141	476	387	557	436	368	130	486	321	104	378	432	142	34	213	30	375	131	177	160	97	195	237	246	177	308	133	194	142	190	151	219	155	178	148	188	195	88	319
chr1_67134838_hg38	chr1	67133701	67135974	38	28	29	32	18	31	69	25	26	41	27	41	42	23	37	35	30	29	15	4	7	29	8	31	13	31	13	11	35	37	24	20	27	26	24	18	30	19	18	28	14	24	16	15	21	31
chr1_67149079_hg38	chr1	67148078	67150080	10	20	22	21	25	57	40	21	34	13	30	21	23	12	36	17	25	26	9	3	2	9	10	18	4	30	11	13	15	22	23	8	13	13	21	5	16	8	16	29	3	5	10	10	5	10
chr1_67307861_hg38	chr1	67306508	67309214	51	24	55	27	12	22	32	20	22	47	33	22	33	21	23	54	27	48	10	3	2	48	11	69	12	22	16	7	36	35	26	20	43	26	28	13	19	16	16	14	12	14	13	8	8	8
chr1_67340266_hg38	chr1	67338737	67341795	33	113	137	5	7	28	74	52	36	6	23	24	32	21	38	39	60	75	9	5	2	85	44	81	14	26	13	16	47	59	38	26	31	43	21	15	18	17	8	8	65	39	57	17	18	14
chr1_67348178_hg38	chr1	67347118	67349237	21	45	66	10	11	15	29	12	10	6	11	11	16	9	13	25	6	41	12	2	2	44	10	38	7	12	7	12	32	29	15	20	21	20	14	9	16	11	8	14	45	37	36	27	6	19
chr1_67393944_hg38	chr1	67392944	67394944	17	6	30	15	6	25	35	12	17	18	14	22	18	12	21	17	5	22	7	4	3	19	15	27	23	23	8	9	32	36	25	16	36	27	19	18	26	14	21	24	25	22	32	24	12	32
chr1_67464527_hg38	chr1	67463073	67465981	24	76	98	15	13	22	49	25	33	20	39	35	17	26	37	27	38	38	19	2	3	45	22	50	6	27	18	19	64	36	24	22	34	44	18	5	18	15	5	13	47	42	44	21	6	19
chr1_67468578_hg38	chr1	67467334	67469823	24	80	100	8	4	10	20	15	10	12	10	18	8	17	10	29	26	29	15	7	3	36	15	38	6	14	15	11	43	29	18	14	16	25	6	5	13	7	6	8	72	33	38	20	6	17
chr1_67559520_hg38	chr1	67558400	67560639	35	45	72	26	15	41	87	42	33	47	34	37	42	26	36	48	19	59	11	5	7	42	13	64	11	15	9	17	21	30	12	10	17	27	9	5	19	6	11	16	16	24	26	18	8	25
chr1_67583418_hg38	chr1	67582420	67584417	30	14	45	21	11	25	52	25	27	26	23	24	40	21	32	52	9	36	14	1	6	19	8	34	14	29	9	10	21	13	13	20	15	39	8	17	33	15	13	10	12	23	13	20	11	25
chr1_67613158_hg38	chr1	67612100	67614215	15	10	37	12	6	29	26	19	18	25	16	23	16	13	17	30	5	48	5	1	4	26	9	43	6	8	7	7	9	7	13	9	21	18	12	8	14	9	2	12	9	16	17	13	7	17
chr1_67675211_hg38	chr1	67674106	67676316	19	30	49	19	16	29	60	40	46	31	50	42	42	27	43	47	35	61	4	7	1	64	20	72	5	28	14	9	19	29	29	13	16	20	20	8	20	24	15	23	37	39	50	43	28	36
chr1_67685252_hg38	chr1	67682576	67687928	137	156	902	218	62	371	362	125	456	335	427	402	283	130	545	307	59	501	161	34	16	293	47	490	106	152	65	43	239	267	162	200	234	181	194	140	199	132	127	117	229	177	192	181	83	255
chr1_67736444_hg38	chr1	67735268	67737619	44	72	106	35	20	41	105	50	80	58	76	74	56	75	95	68	23	115	19	7	5	84	35	95	26	32	19	17	56	58	37	30	23	38	24	16	50	24	19	23	49	72	64	53	57	92
chr1_67749480_hg38	chr1	67747548	67751413	23	87	129	28	42	57	117	88	86	49	92	88	52	52	101	55	63	80	19	11	19	110	43	110	32	66	16	20	63	55	71	40	47	56	37	41	62	57	34	53	48	52	70	51	44	104
chr1_67766604_hg38	chr1	67765342	67767865	29	41	68	41	24	67	86	46	52	36	54	64	46	21	56	28	40	60	12	0	9	49	18	72	23	40	16	14	37	32	36	39	23	33	35	15	26	25	30	51	24	39	54	42	32	55
chr1_67791941_hg38	chr1	67790904	67792978	15	21	40	22	8	49	85	52	49	33	64	65	18	17	62	40	39	48	24	1	6	56	23	57	9	28	11	10	14	20	18	17	13	17	11	10	32	13	11	12	37	37	45	46	39	95
chr1_67832728_hg38	chr1	67831141	67834316	66	38	227	92	23	202	205	68	181	232	190	213	171	72	234	149	55	168	31	9	7	125	19	191	41	79	22	20	50	71	65	69	74	83	68	37	75	54	54	59	71	76	92	74	58	124
chr1_67850294_hg38	chr1	67848827	67851762	7	32	41	13	35	73	55	68	47	19	19	39	23	37	59	17	29	36	11	0	5	20	13	27	10	19	13	13	13	17	7	15	14	24	5	10	23	7	12	22	5	14	11	9	10	19
chr1_67854706_hg38	chr1	67851886	67857525	21	56	68	21	46	95	135	115	119	43	74	80	60	69	192	36	32	78	38	1	14	40	38	68	17	39	17	22	26	32	36	38	30	43	42	19	22	29	24	26	26	42	61	43	32	86
chr1_68011746_hg38	chr1	68010685	68012806	3	6	9	7	7	17	71	51	61	7	22	13	23	25	96	4	30	17	7	4	2	5	5	10	7	19	8	17	10	14	10	5	9	19	39	11	15	10	8	5	12	10	8	16	15	20
chr1_68105676_hg38	chr1	68101939	68109412	69	186	192	142	180	381	318	180	245	116	183	208	191	157	327	152	103	195	39	8	11	119	66	189	46	81	35	40	65	80	79	64	61	106	50	55	107	75	33	110	46	59	57	51	38	100
chr1_68112729_hg38	chr1	68110541	68114917	88	122	173	62	110	211	171	92	164	40	97	124	119	94	204	89	48	129	58	4	32	108	44	140	32	63	65	56	58	60	57	63	38	64	38	34	65	40	29	66	28	31	43	31	17	60
chr1_68116892_hg38	chr1	68115167	68118618	70	101	145	45	36	119	114	87	83	64	111	92	62	70	110	66	57	80	23	6	21	70	34	96	17	45	33	16	47	56	33	32	27	49	22	17	45	21	27	48	34	36	45	43	18	83
chr1_68120654_hg38	chr1	68118729	68122580	85	227	211	25	25	87	73	60	34	26	67	88	33	40	63	63	34	84	21	10	6	83	26	110	23	40	17	22	111	56	39	41	34	44	22	18	37	35	20	31	85	57	63	42	33	71
chr1_68149632_hg38	chr1	68148633	68150632	36	67	68	12	8	17	39	29	9	27	37	49	19	24	16	32	14	39	42	27	50	37	10	47	7	24	47	31	39	29	14	14	18	31	10	9	18	17	8	10	14	19	16	17	10	24
chr1_68175117_hg38	chr1	68172789	68177445	92	157	212	32	29	84	212	126	101	65	183	171	72	61	121	140	84	184	40	4	17	164	49	205	29	69	34	25	101	82	42	58	68	80	34	19	71	52	24	29	185	136	139	87	56	154
chr1_68231346_hg38	chr1	68228672	68234020	131	220	502	151	67	269	257	141	345	269	349	387	241	136	349	214	143	327	50	19	15	259	72	370	27	53	19	17	62	58	51	51	39	45	23	24	63	42	29	35	223	197	182	129	91	242
chr1_68313824_hg38	chr1	68312827	68314820	10	21	35	13	11	22	49	31	20	11	37	31	22	11	34	15	37	25	9	3	0	36	13	26	6	25	6	9	21	15	24	17	14	23	14	6	31	22	16	18	17	32	28	8	4	18
chr1_68323024_hg38	chr1	68321732	68324317	45	80	53	22	8	28	57	32	27	26	41	50	20	16	22	43	18	38	16	7	7	62	14	52	9	20	9	19	20	29	14	11	14	33	5	11	21	11	7	12	23	34	38	14	11	22
chr1_68342808_hg38	chr1	68341752	68343864	36	47	49	22	13	23	36	14	15	24	31	26	20	25	20	29	20	29	7	6	3	24	9	48	9	12	7	10	20	17	17	8	7	9	7	8	10	8	4	6	13	14	14	15	6	9
chr1_68358268_hg38	chr1	68356918	68359618	19	125	83	14	27	33	88	42	23	30	30	36	20	9	21	34	12	64	12	3	8	78	26	75	3	23	9	19	31	28	15	17	18	29	7	12	27	15	8	12	44	35	41	32	33	51
chr1_68497018_hg38	chr1	68495551	68498484	41	50	78	53	26	71	125	55	54	77	77	56	59	35	63	57	35	86	15	8	6	80	17	87	34	51	23	17	44	72	52	33	40	51	47	25	40	28	36	37	30	25	33	30	17	48
chr1_68571794_hg38	chr1	68570362	68573227	8	99	112	11	12	2	51	53	33	12	8	9	14	9	41	24	54	49	3	0	5	49	21	81	1	4	9	12	19	22	13	17	18	22	3	9	9	8	4	7	99	68	60	19	9	14
chr1_68576430_hg38	chr1	68575253	68577608	24	23	12	4	11	5	10	17	10	3	6	7	15	8	13	18	48	17	3	20	2	20	80	10	2	7	9	7	13	16	7	6	12	15	4	2	4	0	2	5	8	14	6	6	10	6
chr1_68619211_hg38	chr1	68617013	68621409	40	137	144	7	5	13	46	22	16	5	10	10	13	8	24	43	45	116	22	4	0	82	32	118	8	12	25	20	73	55	27	26	36	29	11	8	11	7	8	10	57	41	37	11	4	17
chr1_68633620_hg38	chr1	68632551	68634688	9	48	29	11	25	9	66	18	18	7	11	11	16	5	37	10	13	17	2	3	3	27	10	28	7	10	0	7	9	13	5	5	8	11	6	8	8	8	3	7	26	24	11	4	3	7
chr1_68745446_hg38	chr1	68743817	68747075	12	82	77	3	8	4	12	21	7	4	9	15	5	6	13	22	4	65	38	3	1	47	19	70	2	10	98	56	49	41	14	14	23	26	7	6	7	14	5	6	36	29	27	6	7	9
chr1_68813096_hg38	chr1	68811148	68815043	14	190	107	7	9	23	85	78	72	10	19	29	19	35	101	28	18	49	19	3	6	61	34	72	5	27	21	31	55	36	23	17	18	26	20	8	6	14	7	18	79	55	83	27	20	31
chr1_68916084_hg38	chr1	68914848	68917321	24	82	84	6	5	11	61	53	22	6	22	16	16	4	40	32	14	64	4	1	2	56	40	53	3	17	15	9	28	30	15	8	16	27	14	5	13	8	8	10	30	27	25	12	11	14
chr1_68938496_hg38	chr1	68937452	68939539	4	26	12	1	0	5	51	39	50	0	8	15	17	20	66	11	9	13	8	1	0	9	11	12	5	11	12	6	8	5	4	2	15	13	14	3	9	4	3	4	13	9	6	6	6	18
chr1_68975446_hg38	chr1	68973431	68977462	36	204	177	8	15	12	73	87	62	15	30	50	29	24	68	33	81	95	24	5	7	83	34	124	10	32	10	18	53	47	23	24	20	32	33	12	17	8	8	10	70	42	51	17	13	41
chr1_69123017_hg38	chr1	69122013	69124021	18	52	28	14	21	28	50	51	41	11	19	22	23	23	42	13	52	26	8	2	3	29	25	38	14	22	8	7	24	17	23	14	22	16	7	10	18	12	18	36	33	27	19	10	9	5
chr1_69230869_hg38	chr1	69228977	69232761	26	138	123	3	11	13	48	31	21	6	15	35	29	17	25	34	17	41	6	1	1	42	45	67	5	11	10	15	56	42	24	21	21	31	8	5	14	8	2	5	60	46	49	14	4	16
chr1_69568382_hg38	chr1	69565720	69571044	205	302	1015	197	100	526	377	186	845	194	399	282	371	375	821	369	188	572	30	9	5	348	109	617	128	158	35	27	336	358	229	156	298	142	280	113	81	84	214	151	371	222	241	76	43	111
chr1_69588626_hg38	chr1	69586544	69590708	26	92	57	24	55	33	146	88	77	50	29	13	48	87	71	44	20	58	22	5	7	42	25	48	57	29	9	12	51	51	45	16	61	25	68	32	27	16	66	75	32	38	25	14	7	13
chr1_69647706_hg38	chr1	69645773	69649640	14	67	54	26	69	47	149	91	106	20	25	37	63	71	87	18	40	42	14	4	1	35	18	54	10	20	7	13	20	18	16	9	18	12	15	9	7	9	14	24	41	38	27	17	6	16
chr1_69707218_hg38	chr1	69706168	69708267	8	69	37	22	60	36	142	66	71	22	30	30	39	27	59	24	62	55	13	1	4	28	13	41	6	22	10	5	12	17	12	5	13	12	9	11	7	9	11	25	9	12	11	8	7	5
chr1_69711797_hg38	chr1	69710130	69713464	29	76	43	63	76	60	158	52	80	26	35	28	63	92	73	35	78	46	13	6	8	57	22	50	13	22	7	14	22	20	13	18	24	15	13	10	12	5	24	23	17	17	17	12	4	19
chr1_69738688_hg38	chr1	69737209	69740166	20	71	57	36	98	90	181	84	97	25	50	52	55	55	83	31	25	61	9	2	2	71	39	76	19	13	8	12	18	20	17	8	20	23	17	13	15	4	15	23	25	21	24	9	6	12
chr1_70042091_hg38	chr1	70040647	70043535	22	85	78	8	7	19	105	42	37	24	31	30	28	17	45	25	41	61	27	12	5	54	17	69	4	13	9	13	23	27	15	7	10	13	10	8	13	6	5	4	34	11	9	10	4	12
chr1_70140414_hg38	chr1	70138929	70141898	17	116	95	16	28	31	103	61	63	24	53	31	35	5	86	33	35	98	15	7	6	119	42	109	11	20	7	20	45	31	30	21	36	32	21	10	17	12	12	14	67	42	51	39	17	48
chr1_70205576_hg38	chr1	70203940	70207212	120	98	287	186	82	222	287	118	226	185	238	201	230	125	228	178	119	224	340	108	56	170	53	218	76	117	69	69	105	121	123	96	108	87	94	65	107	76	105	125	112	87	106	192	83	226
chr1_70221457_hg38	chr1	70219853	70223061	109	93	307	159	52	206	235	70	204	198	217	206	176	116	254	164	69	195	332	145	61	176	36	172	47	118	76	52	103	123	124	98	136	87	98	75	106	79	88	78	176	139	164	223	109	284
chr1_70411140_hg38	chr1	70409381	70412899	124	168	286	205	79	179	353	145	243	242	240	252	220	153	278	208	46	229	490	229	86	195	34	242	66	112	69	64	108	116	136	73	124	55	117	71	111	59	115	86	163	93	128	177	98	245
chr1_70458278_hg38	chr1	70457279	70459276	10	12	24	13	40	31	37	23	16	14	23	31	8	6	13	18	50	17	11	3	3	29	22	18	9	22	15	13	15	22	44	11	26	24	23	8	31	27	32	27	21	27	22	24	12	44
chr1_70487281_hg38	chr1	70486121	70488441	16	16	25	21	15	37	24	14	13	4	25	28	21	14	20	19	13	29	52	10	14	15	7	18	28	19	79	36	24	20	39	17	27	26	11	21	41	23	37	40	7	8	15	5	1	8
chr1_71047742_hg38	chr1	71046612	71048873	23	4	27	41	13	52	41	5	21	47	36	27	36	3	27	28	1	34	17	8	4	17	3	35	14	36	22	16	24	25	24	35	23	22	21	17	29	24	13	29	16	17	27	22	7	25
chr1_71082080_hg38	chr1	71079707	71084454	109	131	196	140	166	232	290	132	185	139	178	183	222	161	192	164	68	123	222	88	43	178	54	158	87	91	55	52	94	107	115	76	108	57	102	78	115	93	116	117	114	81	109	135	50	175
chr1_71193724_hg38	chr1	71190744	71196705	26	260	193	11	33	26	47	24	13	5	22	17	11	10	12	41	41	55	48	52	42	74	34	72	8	15	71	55	60	51	25	21	28	30	12	11	20	17	12	17	76	55	44	19	11	20
chr1_71225920_hg38	chr1	71221784	71230055	32	269	203	10	35	24	115	67	32	12	32	20	22	19	65	58	53	122	41	14	24	98	52	151	10	27	345	344	106	63	42	31	53	49	23	16	24	22	16	17	55	20	44	19	21	28
chr1_71235114_hg38	chr1	71234109	71236119	3	11	13	3	3	5	8	8	5	3	11	5	2	2	12	5	5	6	3	2	5	9	1	17	8	8	54	55	14	6	6	4	2	7	7	6	3	3	4	5	2	4	4	4	1	6
chr1_71428188_hg38	chr1	71424947	71431429	38	101	88	50	118	82	170	76	48	48	74	66	65	57	32	41	44	68	312	163	81	88	32	70	29	43	141	151	83	43	50	18	36	38	24	25	45	39	23	43	38	69	59	18	20	43
chr1_71548588_hg38	chr1	71547443	71549732	16	61	55	6	9	4	9	5	6	2	9	6	4	1	3	17	20	37	19	2	2	54	22	46	7	5	8	11	28	38	14	11	18	10	6	3	7	7	10	4	58	37	58	11	10	16
chr1_71565703_hg38	chr1	71562182	71569224	28	153	131	9	16	11	59	33	10	5	9	9	16	9	19	30	41	31	445	250	116	66	23	63	6	16	169	155	57	38	18	17	32	31	10	7	14	11	15	18	148	93	79	24	25	37
chr1_71634418_hg38	chr1	71633022	71635813	7	18	25	4	10	9	21	11	5	1	10	6	7	9	7	12	3	14	202	69	47	24	6	14	3	10	61	44	27	9	8	7	14	10	7	2	6	5	3	7	16	16	24	11	4	16
chr1_71641660_hg38	chr1	71640612	71642707	7	36	34	4	11	8	28	16	13	5	13	8	5	5	7	6	3	10	86	34	20	22	4	19	3	20	59	29	22	27	6	7	12	16	6	4	6	4	4	9	12	12	18	12	2	14
chr1_71738472_hg38	chr1	71737326	71739618	24	22	29	11	13	17	28	4	6	6	8	8	6	6	8	12	20	21	277	73	66	22	13	21	4	9	38	28	14	10	16	2	6	14	9	5	8	8	3	7	14	16	19	8	8	11
chr1_71785324_hg38	chr1	71782375	71788273	28	236	192	7	23	15	52	41	20	19	18	12	16	15	15	33	22	67	117	95	85	80	22	85	8	15	75	45	89	47	30	14	40	26	11	6	18	10	19	15	64	46	45	29	21	27
chr1_71828986_hg38	chr1	71827586	71830386	17	86	78	22	76	58	108	58	40	30	58	46	38	32	29	24	38	36	31	27	16	39	13	41	19	26	24	21	46	19	32	9	13	9	15	20	27	27	27	42	53	42	40	47	36	60
chr1_71850348_hg38	chr1	71849344	71851353	3	12	11	3	4	8	13	19	4	4	3	4	6	4	3	8	2	10	8	17	9	7	2	5	1	6	46	17	11	4	9	1	4	10	3	3	2	6	3	9	10	12	11	5	4	6
chr1_71859409_hg38	chr1	71858407	71860411	6	71	71	9	8	18	66	26	25	8	10	6	8	7	30	11	14	40	82	11	12	33	19	33	2	19	71	22	19	16	15	7	16	9	4	8	5	8	1	5	22	22	19	20	5	11
chr1_72064546_hg38	chr1	72063412	72065680	5	38	33	14	54	28	78	35	22	20	22	19	14	16	20	8	28	18	7	4	4	27	8	13	9	25	21	20	33	7	21	8	17	9	17	17	24	13	23	29	5	9	8	15	9	14
chr1_72636930_hg38	chr1	72634941	72638918	10	41	25	14	30	12	52	16	11	9	20	11	16	9	13	7	23	19	157	199	103	30	23	21	2	13	79	21	25	16	14	14	13	16	5	4	10	10	5	5	26	31	28	23	15	41
[truncated: 49,285 more rows]
[truncated: 18 more columns]
