# Supplementary material for: Human-specific features of spatial gene expression and regulation in eight brain regions
Source: HighWire-hosted journal article supplement (doi:10.1101/gr.231357.117), 2018-06-13
Supplement: Supplemental_Table_S5.xlsx [file Supplemental_Table_S5.xlsx]

## Sheet: Supplemental Table S5
Supplemental Table S5. Relationship between genes and CREs showing significant differences between humans and chimpanzees
Brain regions	Enrichment of CREs located near human-chimp. differentially expressed genes in human-chimp. differential coverage CREs
	No direction			human-higher			human-lower
	#CRE (annotated)	#CRE (significant)	P	#CRE (annotated)	#CRE (significant)	P	#CRE (annotated)	#CRE (significant)	P
DPFC_PFC	1281	235	0	443	55	4.87752e-08	838	126	0
VPFC_PFC	1280	199	4.40388e-15	443	44	4.87752e-08	837	121	0
PMC_PcGm	1259	199	0	544	58	1.14939e-08	715	97	0
V1C_OP	810	146	1.94289e-16	388	37	2.43913e-05	422	73	0
STR_CN	2187	353	9.32587e-16	1110	128	7.09025e-13	1077	137	0
STR_Put	2309	393	0	1237	161	0	1072	143	0
CB_CB	6846	1341	7.06033e-11	5065	679	1.24345e-14	1781	260	0
Brain regions: brain regions shared between transcriptome and epigenome datasets.
No direction: do not consider direction of gene expression/CRE coverage differences.
human-higher, human-lower: direction of gene expression/CRE coverage differences.
#CRE: number of CREs.
annotated: CREs showing differential coverage between humans and chimpanzees and coupled to all expressed genes in each shared brain region.
significant: CREs showing differential coverage between humans and chimpanzees and coupled to human-chimp. differentially expressed genes in each shared brain region.
P: hypergeometric test p-value after BH correction.
