# Supplementary material for: Human-specific features of spatial gene expression and regulation in eight brain regions
Source: HighWire-hosted journal article supplement (doi:10.1101/gr.231357.117), 2018-06-13
Supplement: Supplemental_Table_S6.xlsx [file Supplemental_Table_S6.xlsx]

## Sheet: Supplemental Table S6
Supplemental Table S6. Relationship between genes and CREs showing species-specific changes
Brain regions	Enrichment of CREs located near genes with human-specific expression differences in CREs with human-specific coverage differences									Enrichment of CREs located near genes with chimp.-specific expression differences in CREs with chimp.-specific coverage differences
	No direction			human-higher			human-lower			No direction			chimp.-higher			chimp.-lower
	#CRE (annotated)	#CRE (significant)	P	#CRE (annotated)	#CRE (significant)	P	#CRE (annotated)	#CRE (significant)	P	#CRE (annotated)	#CRE (significant)	P	#CRE (annotated)	#CRE (significant)	P	#CRE (annotated)	#CRE (significant)	P
DPFC_PFC	68	29	0.0122859	20	13	0.000167404	48	8	0.00302158	97	57	0.0070242	84	50	7.59664e-07	13	3	0.255083
VPFC_PFC	55	22	0.050214	13	6	0.0395248	42	10	0.00105929	82	40	0.076978	69	36	0.000423002	13	1	0.663842
PMC_PcGm	67	30	0.169737	33	15	0.0395248	34	8	0.00823069	85	39	0.00164612	64	33	2.44232e-07	21	4	0.136252
V1C_OP	61	31	0.00090568	18	11	0.00118189	43	10	0.000439208	45	19	0.386951	31	15	0.0130231	14	3	0.255083
STR_CN	128	58	8.88541e-05	85	39	6.73566e-07	43	11	0.000439208	118	61	0.00402722	86	38	3.72166e-05	32	8	0.136252
STR_Put	155	74	1.00497e-06	104	55	5.07638e-12	51	9	0.00823069	124	67	0.00141479	87	42	1.30285e-06	37	12	0.025708
CB_CB	589	291	0.000322017	520	243	3.54364e-07	69	14	0.000439208	351	114	0.0253902	189	63	3.40822e-06	162	22	0.0460832
Brain regions: brain regions shared between transcriptome and epigenome datasets.
No direction: do not consider direction of gene expression/CRE coverage differences.
human-higher, human-lower, chimp.-higher, chimp.-lower: direction of gene expression/CRE coverage differences.
#CRE: number of CREs.
annotated: CREs showing species-specific coverage differences and coupled to human-chimp. differentially expressed genes in each shared brain region.
significant: CREs showing species-specific coverage differences and coupled to genes showing species-specific expression differences in each shared brain region.
P: hypergeometric test p-value after BH correction.
