# Supplementary material for: Human-specific features of spatial gene expression and regulation in eight brain regions
Source: HighWire-hosted journal article supplement (doi:10.1101/gr.231357.117), 2018-06-13
Supplement: Supplemental_Table_S7.xlsx [file Supplemental_Table_S7.xlsx]

## Sheet: Supplemental Table S7
Supplemental Table S7. CRE coverage differences among species
Brain regions	CREs located near genes differentially expressed between human and chimp.				CREs located near genes with human-specific expression changes						CREs located near genes with chimp.-specific expression changes
	human-higher		human-lower		human-higher			human-lower			chimp.-lower			chimp.-higher
	#CREs	human-chimp. P	#CREs	human-chimp. P	#CREs	human-chimp. P	human-macaque P	#CREs	human-chimp. P	human-macaque P	#CREs	chimp.-human P	chimp.-macaque P	#CREs	chimp.-human P	chimp.-macaque P
DPFC_PFC	1796	7.30155e-16	1605	5.44512e-79	805	3.36449e-05	1.2597e-21	169	1.48599e-09	7.57316e-06	428	3.33581e-06	4.91171e-13	1103	6.34119e-60	1.05863e-88
VPFC_PFC	1277	3.21842e-12	1551	2.22426e-53	602	0.0422528	0.000450099	205	1.99657e-09	0.000165121	227	1.82984e-05	2.11292e-09	907	6.37383e-38	5.79488e-68
PMC_PcGM	1494	4.88686e-34	1181	1.14886e-41	792	1.06375e-10	7.39145e-41	236	0.0109266	0.000887411	211	4.6263e-08	3.3394e-08	557	2.0516e-33	4.4393e-21
V1C_OP	1455	7.82168e-12	1368	7.25028e-25	679	0.000126427	7.09789e-09	173	6.12766e-09	0.00588449	308	0.0332329	0.980819	796	2.44657e-09	4.77053e-17
STR_CN	1879	2.38582e-13	1525	3.912e-45	728	4.61737e-05	2.12657e-11	240	4.74288e-11	1.18847e-07	483	0.00237619	1.21656e-14	819	6.57876e-10	8.68992e-18
STR_Put	1879	1.44068e-61	1525	1.32904e-53	728	6.50285e-21	1.13605e-31	240	6.3872e-14	3.25452e-08	483	2.26632e-17	5.60791e-07	819	5.76663e-15	6.74167e-08
CB_CB	3236	0.000288197	2118	1.25995e-11	1932	1	1.09197e-25	333	0.00239062	1.38242e-30	442	6.6646e-33	2.98622e-06	1028	4.63132e-06	0.000548334
Brain regions: brain regions shared between transcriptome and epigenome datasets.
human-higher, human-lower, chimp.-higher, chimp.-lower: direction of gene expression differences
#CREs: number of CREs
P: one-sided Wilcoxon rank-sum test p-value
