# Supplementary material for: Human-specific features of spatial gene expression and regulation in eight brain regions
Source: HighWire-hosted journal article supplement (doi:10.1101/gr.231357.117), 2018-06-13
Supplement: Supplemental_Table_S8.xlsx [file Supplemental_Table_S8.xlsx]

## Sheet: 工作表1
Supplemental Table S8. Genes within each module from the co-expression network
Ensembl ID	Gene symbol	Module label
ENSG00000025039	RRAGD	1
ENSG00000079257	LXN	1
ENSG00000087111	PIGS	1
ENSG00000102174	PHEX	1
ENSG00000102218	RP2	1
ENSG00000102312	PORCN	1
ENSG00000106799	TGFBR1	1
ENSG00000107623		1
ENSG00000109501	WFS1	1
ENSG00000113621	TXNDC15	1
ENSG00000115107	STEAP3	1
ENSG00000119227	PIGZ	1
ENSG00000124508	BTN2A2	1
ENSG00000125378	BMP4	1
ENSG00000125409	TEKT3	1
ENSG00000126259	KIRREL2	1
ENSG00000135048	TMEM2	1
ENSG00000137193	PIM1	1
ENSG00000143036	SLC44A3	1
ENSG00000144647	POMGNT2	1
ENSG00000150403	TMCO3	1
ENSG00000151164	RAD9B	1
ENSG00000151846	PABPC3	1
ENSG00000152467	ZSCAN1	1
ENSG00000154316	TDH	1
ENSG00000157350	ST3GAL2	1
ENSG00000159409	CELF3	1
ENSG00000160613	PCSK7	1
ENSG00000162849	KIF26B	1
ENSG00000165188	RNF183	1
ENSG00000165948	IFI27L1	1
ENSG00000168070	C11orf85	1
ENSG00000168263	KCNV2	1
ENSG00000168418	KCNG4	1
ENSG00000171812	COL8A2	1
ENSG00000175711	B3GNTL1	1
ENSG00000180245	RRH	1
ENSG00000186230	ZNF749	1
ENSG00000188529	SRSF10	1
ENSG00000189143	CLDN4	1
ENSG00000189350	FAM179A	1
ENSG00000196859	KRT39	1
ENSG00000203908	KHDC3L	1
ENSG00000206053	HN1L	1
ENSG00000206069	TMEM211	1
ENSG00000207707	MIR639	1
ENSG00000221923	ZNF880	1
ENSG00000223474		1
ENSG00000226744	AC079781.5	1
ENSG00000230162	CT45A11P	1
ENSG00000237594	AP000251.3	1
ENSG00000244485	RPL18P13	1
ENSG00000250218	ALDH1L1-AS1	1
ENSG00000250305	KIAA1456	1
ENSG00000255020	AF131216.5	1
ENSG00000258128	MKRN9P	1
ENSG00000259539	CTD-2651B20.1	1
ENSG00000260023		1
ENSG00000264207	RP11-196G18.23	1
ENSG00000264589	MAPT-AS1	1
ENSG00000266479	CTD-2515C13.1	1
ENSG00000267470	ZNF571-AS1	1
ENSG00000269289	CTB-92J24.3	1
ENSG00000270706	PRMT1P1	1
ENSG00000271320	RP11-1152H14.1	1
ENSG00000272750	RP11-378J18.8	1
ENSG00000067829	IDH3G	1
ENSG00000070423	RNF126	1
ENSG00000073910	FRY	1
ENSG00000102043	MTMR8	1
ENSG00000104901	DKKL1	1
ENSG00000105467	SYNGR4	1
ENSG00000113441	LNPEP	1
ENSG00000114204	SERPINI2	1
ENSG00000114654	EFCC1	1
ENSG00000119900	OGFRL1	1
ENSG00000124302	CHST8	1
ENSG00000125503	PPP1R12C	1
ENSG00000128536	CDHR3	1
ENSG00000130204	TOMM40	1
ENSG00000130522	JUND	1
ENSG00000146352	CLVS2	1
ENSG00000147234	FRMPD3	1
ENSG00000148734	NPFFR1	1
ENSG00000154319	FAM167A	1
ENSG00000157240	FZD1	1
ENSG00000159788	RGS12	1
ENSG00000160352	ZNF714	1
ENSG00000162688	AGL	1
ENSG00000165084	C8orf34	1
ENSG00000165215	CLDN3	1
ENSG00000166136	NDUFB8	1
ENSG00000167508	MVD	1
ENSG00000167749	KLK4	1
ENSG00000168491	CCDC110	1
ENSG00000168672	FAM84B	1
ENSG00000169169	CPT1C	1
ENSG00000170153	RNF150	1
ENSG00000170417	TMEM182	1
ENSG00000170743	SYT9	1
ENSG00000173641	HSPB7	1
ENSG00000174749	C4orf32	1
ENSG00000175920	DOK7	1
ENSG00000176761	ZNF285B	1
ENSG00000180287	PLD5	1
ENSG00000181619	GPR135	1
ENSG00000182327	GLTPD2	1
ENSG00000187905	LRRC74B	1
ENSG00000188452	CERKL	1
ENSG00000188761	BCL2L15	1
ENSG00000197128	ZNF772	1
ENSG00000197208	SLC22A4	1
ENSG00000197647	ZNF433	1
ENSG00000205086	C2orf91	1
ENSG00000212189	RNU6-328P	1
ENSG00000225830	ERCC6	1
ENSG00000227591	RP1-28O10.1	1
ENSG00000227741	RP11-536C5.7	1
ENSG00000229091	HSPA8P8	1
ENSG00000230725	RP4-738P15.1	1
ENSG00000235319	AC012360.4	1
ENSG00000242268	RP11-368I23.2	1
ENSG00000242276	RPL5P3	1
ENSG00000245694	CRNDE	1
ENSG00000251348	HSPD1P11	1
ENSG00000254656	RTL1	1
ENSG00000258285	TESC-AS1	1
ENSG00000259362	RP11-307C19.1	1
ENSG00000261013	CTD-2050B12.1	1
ENSG00000261842	RP11-143I21.1	1
ENSG00000261872	RP5-867C24.5	1
ENSG00000261886	RP11-63A1.1	1
ENSG00000265408	RP11-361L15.4	1
ENSG00000265665	AC008391.1	1
ENSG00000266909	SLC25A6P4	1
ENSG00000269894	RP11-1020A11.1	1
ENSG00000271734	RP1-111B22.3	1
ENSG00000272020	RNU1-30P	1
ENSG00000272103	CTD-2653M23.3	1
ENSG00000272761		1
ENSG00000010539	ZNF200	1
ENSG00000100558	PLEK2	1
ENSG00000103152	MPG	1
ENSG00000143387	CTSK	1
ENSG00000144488	ESPNL	1
ENSG00000146233	CYP39A1	1
ENSG00000183166	CALN1	1
ENSG00000224448	GS1-259H13.7	1
ENSG00000228847	ATP5G2P4	1
ENSG00000228961	AP000282.3	1
ENSG00000233822	HIST1H2BN	1
ENSG00000238033	AC002480.2	1
ENSG00000246250	RP11-613D13.5	1
ENSG00000254726	MEX3A	1
ENSG00000272137	RP11-177G23.2	1
ENSG00000023171	GRAMD1B	1
ENSG00000038295	TLL1	1
ENSG00000058600	POLR3E	1
ENSG00000063015	SEZ6	1
ENSG00000076356	PLXNA2	1
ENSG00000080854	IGSF9B	1
ENSG00000082293	COL19A1	1
ENSG00000089199	CHGB	1
ENSG00000091831	ESR1	1
ENSG00000115339	GALNT3	1
ENSG00000126705	AHDC1	1
ENSG00000131018	SYNE1	1
ENSG00000135333	EPHA7	1
ENSG00000136295	TTYH3	1
ENSG00000139146	FAM60A	1
ENSG00000143363	PRUNE	1
ENSG00000143669	LYST	1
ENSG00000145536	ADAMTS16	1
ENSG00000153820	SPHKAP	1
ENSG00000157570	TSPAN18	1
ENSG00000157890	MEGF11	1
ENSG00000162434	JAK1	1
ENSG00000162437	RAVER2	1
ENSG00000166250	CLMP	1
ENSG00000167695	FAM57A	1
ENSG00000168124	OR1F1	1
ENSG00000168778	TCTN2	1
ENSG00000173166	RAPH1	1
ENSG00000174326	SLC16A11	1
ENSG00000175198	PCCA	1
ENSG00000177427	MIEF2	1
ENSG00000186472	PCLO	1
ENSG00000197826	C4orf22	1
ENSG00000198018	ENTPD7	1
ENSG00000198879	SFMBT2	1
ENSG00000221845	C7orf65	1
ENSG00000224647	AC026954.6	1
ENSG00000235526	RP5-1028L10.2	1
ENSG00000238105	GOLGA2P5	1
ENSG00000254192	CTC-558O2.2	1
ENSG00000254667	AP000783.1	1
ENSG00000111057	KRT18	1
ENSG00000176597	B3GNT5	1
ENSG00000177200	CHD9	1
ENSG00000202566	MIR421	1
ENSG00000212125	TAS2R15P	1
ENSG00000254102	RP11-21C4.1	1
ENSG00000264359	NEK4P2	1
ENSG00000074370	ATP2A3	1
ENSG00000148795	CYP17A1	1
ENSG00000151575	TEX9	1
ENSG00000173805	HAP1	1
ENSG00000188523	CFAP77	1
ENSG00000188817	SNTN	1
ENSG00000226081	USP12PX	1
ENSG00000247498	RP11-392P7.6	1
ENSG00000255202	RP4-541C22.5	1
ENSG00000259707	RP11-752G15.4	1
ENSG00000262668	AJ003147.9	1
ENSG00000101460	MAP1LC3A	1
ENSG00000104833	TUBB4A	1
ENSG00000075275	CELSR1	1
ENSG00000128923	FAM63B	1
ENSG00000011478	QPCTL	2
ENSG00000067798	NAV3	2
ENSG00000067840	PDZD4	2
ENSG00000073009		2
ENSG00000074803	SLC12A1	2
ENSG00000075073	TACR2	2
ENSG00000088836	SLC4A11	2
ENSG00000090534	THPO	2
ENSG00000099365	STX1B	2
ENSG00000100219	XBP1	2
ENSG00000104731	KLHDC4	2
ENSG00000105993	DNAJB6	2
ENSG00000107282	APBA1	2
ENSG00000107954	NEURL1	2
ENSG00000108509	CAMTA2	2
ENSG00000108819	PPP1R9B	2
ENSG00000110697	PITPNM1	2
ENSG00000112031	MTRF1L	2
ENSG00000112149	CD83	2
ENSG00000116183	PAPPA2	2
ENSG00000122674	CCZ1	2
ENSG00000124313	IQSEC2	2
ENSG00000124588	NQO2	2
ENSG00000125459	MSTO1	2
ENSG00000127589	TUBBP1	2
ENSG00000132359	RAP1GAP2	2
ENSG00000132640	BTBD3	2
ENSG00000134871	COL4A2	2
ENSG00000136425	CIB2	2
ENSG00000141543	EIF4A3	2
ENSG00000141622	RNF165	2
ENSG00000142453	CARM1	2
ENSG00000147604	RPL7	2
ENSG00000148090	AUH	2
ENSG00000151502	VPS26B	2
ENSG00000153395	LPCAT1	2
ENSG00000156011	PSD3	2
ENSG00000161681	SHANK1	2
ENSG00000162490	DRAXIN	2
ENSG00000165637	VDAC2	2
ENSG00000171858	RPS21	2
ENSG00000173465	SSSCA1	2
ENSG00000173898	SPTBN2	2
ENSG00000175193	PARL	2
ENSG00000175206	NPPA	2
ENSG00000176046	NUPR1	2
ENSG00000177030	DEAF1	2
ENSG00000177788	RP5-1061H20.4	2
ENSG00000181163	NPM1	2
ENSG00000181819	KCTD9P2	2
ENSG00000182552	RWDD4	2
ENSG00000182853	VMO1	2
ENSG00000183396	TMEM89	2
ENSG00000186298	PPP1CC	2
ENSG00000186868	MAPT	2
ENSG00000197372	ZNF675	2
ENSG00000198911	SREBF2	2
ENSG00000198915	RASGEF1A	2
ENSG00000204623	ZNRD1-AS1	2
ENSG00000213023	SYT3	2
ENSG00000213714	FAM209B	2
ENSG00000214784	AC010468.1	2
ENSG00000225746	SNHG23	2
ENSG00000234176	HSPA8P1	2
ENSG00000235552	RPL6P27	2
ENSG00000237991	RPL35P1	2
ENSG00000240036	RP11-587D21.1	2
ENSG00000240225	ZNF542P	2
ENSG00000240509	RPL34P18	2
ENSG00000241360	PDXP	2
ENSG00000243491	RP11-521D12.5	2
ENSG00000248175		2
ENSG00000257681	RP11-341G23.4	2
ENSG00000259581	TYRO3P	2
ENSG00000260917	RP11-57H14.4	2
ENSG00000261604	CTD-2636A23.2	2
ENSG00000266050	RP11-822E23.6	2
ENSG00000267168	RP11-318A15.7	2
ENSG00000270009		2
ENSG00000270457	RP11-467C18.1	2
ENSG00000272365		2
ENSG00000065989	PDE4A	2
ENSG00000072657	TRHDE	2
ENSG00000072858	SIDT1	2
ENSG00000101084	C20orf24	2
ENSG00000103489	XYLT1	2
ENSG00000104290	FZD3	2
ENSG00000105245	NUMBL	2
ENSG00000107242	PIP5K1B	2
ENSG00000111728	ST8SIA1	2
ENSG00000113763	UNC5A	2
ENSG00000115252	PDE1A	2
ENSG00000120137	PANK3	2
ENSG00000132932	ATP8A2	2
ENSG00000135451	TROAP	2
ENSG00000136531	SCN2A	2
ENSG00000138095	LRPPRC	2
ENSG00000139445	FOXN4	2
ENSG00000140284	SLC27A2	2
ENSG00000149260	CAPN5	2
ENSG00000152061	RABGAP1L	2
ENSG00000155511	GRIA1	2
ENSG00000155966	AFF2	2
ENSG00000157168	NRG1	2
ENSG00000157764	BRAF	2
ENSG00000162409	PRKAA2	2
ENSG00000162636	FAM102B	2
ENSG00000164506	STXBP5	2
ENSG00000165338	HECTD2	2
ENSG00000165572	KBTBD6	2
ENSG00000169018	FEM1B	2
ENSG00000171385	KCND3	2
ENSG00000171798	KNDC1	2
ENSG00000172568	FNDC9	2
ENSG00000172915	NBEA	2
ENSG00000172954	LCLAT1	2
ENSG00000173221	GLRX	2
ENSG00000175893	ZDHHC21	2
ENSG00000183715	OPCML	2
ENSG00000185567	AHNAK2	2
ENSG00000203760	CENPW	2
ENSG00000211514	MIR454	2
ENSG00000214514	KRT42P	2
ENSG00000224531	SMIM13	2
ENSG00000224903	AC005534.8	2
ENSG00000229325	ACAP2-IT1	2
ENSG00000229867	STEAP3-AS1	2
ENSG00000234332	BCAS2P2	2
ENSG00000234502	FYTTD1P1	2
ENSG00000234629	WDR82P1	2
ENSG00000235065	RPL24P2	2
ENSG00000240771	ARHGEF25	2
ENSG00000247775	SNCA-AS1	2
ENSG00000253721	SUMO2P20	2
ENSG00000254842	RP11-890B15.2	2
ENSG00000256189	RP11-167N4.5	2
ENSG00000258084	RP11-754N21.1	2
ENSG00000261212	RP3-507I15.2	2
ENSG00000261654	RP11-96K19.4	2
ENSG00000267191	RP11-15A1.2	2
ENSG00000272327		2
ENSG00000070669	ASNS	2
ENSG00000137731	FXYD2	2
ENSG00000138495	COX17	2
ENSG00000144868	TMEM108	2
ENSG00000172006	ZNF554	2
ENSG00000183258	DDX41	2
ENSG00000214190	RNF152P1	2
ENSG00000215464	AP000354.2	2
ENSG00000233847	AC104113.3	2
ENSG00000254087	LYN	2
ENSG00000259096	FAM35CP	2
ENSG00000259235	RP11-605F22.2	2
ENSG00000005810	MYCBP2	2
ENSG00000054356	PTPRN	2
ENSG00000059588	TARBP1	2
ENSG00000075340	ADD2	2
ENSG00000086289	EPDR1	2
ENSG00000099960	SLC7A4	2
ENSG00000100592	DAAM1	2
ENSG00000102096	PIM2	2
ENSG00000103723	AP3B2	2
ENSG00000106976	DNM1	2
ENSG00000107295	SH3GL2	2
ENSG00000118402	ELOVL4	2
ENSG00000119714	GPR68	2
ENSG00000121671	CRY2	2
ENSG00000124140	SLC12A5	2
ENSG00000126950	TMEM35	2
ENSG00000129084	PSMA1	2
ENSG00000131759	RARA	2
ENSG00000135298	ADGRB3	2
ENSG00000136021	SCYL2	2
ENSG00000136854	STXBP1	2
ENSG00000137509	PRCP	2
ENSG00000139354	GAS2L3	2
ENSG00000140093	SERPINA10	2
ENSG00000145864	GABRB2	2
ENSG00000145882	PCYOX1L	2
ENSG00000146374	RSPO3	2
ENSG00000147687	TATDN1	2
ENSG00000147724	FAM135B	2
ENSG00000148606	POLR3A	2
ENSG00000149970	CNKSR2	2
ENSG00000150594	ADRA2A	2
ENSG00000154359	LONRF1	2
ENSG00000155256	ZFYVE27	2
ENSG00000156515	HK1	2
ENSG00000158470	B4GALT5	2
ENSG00000158560	DYNC1I1	2
ENSG00000161682	FAM171A2	2
ENSG00000163399	ATP1A1	2
ENSG00000163947	ARHGEF3	2
ENSG00000165152	TMEM246	2
ENSG00000166685	COG1	2
ENSG00000167642	SPINT2	2
ENSG00000170396	ZNF804A	2
ENSG00000171246	NPTX1	2
ENSG00000171603	CLSTN1	2
ENSG00000172795	DCP2	2
ENSG00000174938	SEZ6L2	2
ENSG00000176383	B3GNT4	2
ENSG00000183780	SLC35F3	2
ENSG00000183783	KCTD8	2
ENSG00000185274	WBSCR17	2
ENSG00000197969	VPS13A	2
ENSG00000198929	NOS1AP	2
ENSG00000204022	LIPJ	2
ENSG00000234369	TATDN1P1	2
ENSG00000254037	RP11-775B15.3	2
ENSG00000091128	LAMB4	2
ENSG00000104219	ZDHHC2	2
ENSG00000101670	LIPG	2
ENSG00000138092	CENPO	2
ENSG00000145734	BDP1	2
ENSG00000150773	PIH1D2	2
ENSG00000152785	BMP3	2
ENSG00000176927	EFCAB5	2
ENSG00000207280	SNORD20	2
ENSG00000268458	CTC-471J1.9	2
ENSG00000271727	RP11-532F6.4	2
ENSG00000272866	RP11-12D24.10	2
ENSG00000122481	RWDD3	2
ENSG00000124785	NRN1	2
ENSG00000177380	PPFIA3	2
ENSG00000186111	PIP5K1C	2
ENSG00000187461		2
ENSG00000215218	UBE2QL1	2
ENSG00000084764	MAPRE3	2
ENSG00000232430	RPL31P15	2
ENSG00000047346	FAM214A	3
ENSG00000091073	DTX2	3
ENSG00000100147	CCDC134	3
ENSG00000123999	INHA	3
ENSG00000134716	CYP2J2	3
ENSG00000156313	RPGR	3
ENSG00000168411	RFWD3	3
ENSG00000168477	TNXB	3
ENSG00000176387	HSD11B2	3
ENSG00000177932	ZNF354C	3
ENSG00000178691	SUZ12	3
ENSG00000179362	HMGN2P46	3
ENSG00000179363	TMEM31	3
ENSG00000183486	MX2	3
ENSG00000185607	ACTBP7	3
ENSG00000186676	EEF1GP1	3
ENSG00000187008		3
ENSG00000187796	CARD9	3
ENSG00000196152	ZNF79	3
ENSG00000203401		3
ENSG00000203734	ECT2L	3
ENSG00000204072	ARMCX7P	3
ENSG00000204301	NOTCH4	3
ENSG00000204466		3
ENSG00000207357	RNU6-2	3
ENSG00000213700	RPL17P50	3
ENSG00000213772	EIF1P7	3
ENSG00000215165	TCEA1P3	3
ENSG00000224975	INE1	3
ENSG00000225051	HMGB3P22	3
ENSG00000226243	RPL37AP1	3
ENSG00000226557	TRAF6P1	3
ENSG00000227192	RP1-45I4.3	3
ENSG00000227973	PIN4P1	3
ENSG00000228252	COL6A4P2	3
ENSG00000228929	RPS13P2	3
ENSG00000229670	PKP4P1	3
ENSG00000230154	AC018463.4	3
ENSG00000231252	RP11-436K8.1	3
ENSG00000233006	AC034220.3	3
ENSG00000239519	CADM2-AS1	3
ENSG00000239587	AC018730.4	3
ENSG00000243696	RP5-966M1.6	3
ENSG00000244165	P2RY11	3
ENSG00000246339	EXTL3-AS1	3
ENSG00000247199	RP11-373N22.3	3
ENSG00000247556	OIP5-AS1	3
ENSG00000248925	CTD-2083E4.6	3
ENSG00000254122	PCDHGB7	3
ENSG00000258521	RP11-638I2.9	3
ENSG00000259051	HNRNPUP1	3
ENSG00000261534	RP11-244O19.1	3
ENSG00000261996	CTC-281F24.1	3
ENSG00000262097	CTD-2135D7.5	3
ENSG00000262663	RP11-497H17.1	3
ENSG00000264740	AL354923.1	3
ENSG00000266852	MIR4482	3
ENSG00000267390	RP11-635N19.1	3
ENSG00000269176	RP11-727F15.12	3
ENSG00000269514	RP11-370I10.12	3
ENSG00000269549	RP3-461P17.10	3
ENSG00000270020	RP11-463O9.9	3
ENSG00000272444	RP11-1017G21.6	3
ENSG00000273107	RP11-165A20.3	3
ENSG00000273367	RP5-827C21.6	3
ENSG00000018869	ZNF582	3
ENSG00000068831	RASGRP2	3
ENSG00000068976	PYGM	3
ENSG00000072195	SPEG	3
ENSG00000082497	SERTAD4	3
ENSG00000103044	HAS3	3
ENSG00000103253	HAGHL	3
ENSG00000106258	CYP3A5	3
ENSG00000116981	NT5C1A	3
ENSG00000117594	HSD11B1	3
ENSG00000125898	FAM110A	3
ENSG00000125999	BPIFB1	3
ENSG00000130544	ZNF557	3
ENSG00000134551	PRH2	3
ENSG00000141449	GREB1L	3
ENSG00000146648	EGFR	3
ENSG00000149506	ZP1	3
ENSG00000153933	DGKE	3
ENSG00000163029	SMC6	3
ENSG00000164344	KLKB1	3
ENSG00000166317	SYNPO2L	3
ENSG00000170989	S1PR1	3
ENSG00000171357	LURAP1	3
ENSG00000175463	TBC1D10C	3
ENSG00000177398	UMODL1	3
ENSG00000177853	ZNF518A	3
ENSG00000178021	TSPYL6	3
ENSG00000179361	ARID3B	3
ENSG00000180626	ZNF594	3
ENSG00000180884	ZNF792	3
ENSG00000186777	ZNF732	3
ENSG00000187987	ZSCAN23	3
ENSG00000188487	INSC	3
ENSG00000188856	RPSAP47	3
ENSG00000189134	NKAPL	3
ENSG00000189377	CXCL17	3
ENSG00000196296	ATP2A1	3
ENSG00000196476	C20orf96	3
ENSG00000198496	NBR2	3
ENSG00000198870	STKLD1	3
ENSG00000199963	RNU6-605P	3
ENSG00000200579	Y_RNA	3
ENSG00000201080		3
ENSG00000206582	Y_RNA	3
ENSG00000220695	RP1-121G13.3	3
ENSG00000222051	RNU6-1165P	3
ENSG00000223882	ABCC5-AS1	3
ENSG00000224574	COL18A1-AS2	3
ENSG00000228290	TBX18-AS1	3
ENSG00000228679	RP4-676J13.2	3
ENSG00000229007	EXOSC3P1	3
ENSG00000229241	PNPT1P1	3
ENSG00000230224	PHBP9	3
ENSG00000231485	RP4-535B20.1	3
ENSG00000232978	RP11-146N23.4	3
ENSG00000233642	GPR158-AS1	3
ENSG00000235121	RP11-90L20.2	3
ENSG00000235399	RP11-204P2.3	3
ENSG00000236526	RP4-742J24.2	3
ENSG00000236605	AC023115.4	3
ENSG00000236734		3
ENSG00000237017	AC012314.8	3
ENSG00000237212	RP11-569G13.2	3
ENSG00000238713	Y_RNA	3
ENSG00000239282	GATSL3	3
ENSG00000239494	RN7SL333P	3
ENSG00000240050	RP1-93H18.1	3
ENSG00000242853	RN7SL749P	3
ENSG00000249717	RP11-44F21.3	3
ENSG00000250332	CTD-2272G21.2	3
ENSG00000250343	CTC-255N20.1	3
ENSG00000250492	INTS6P1	3
ENSG00000251164	HULC	3
ENSG00000252755	RNU6-703P	3
ENSG00000254004	ZNF260	3
ENSG00000255629	RP11-196H14.3	3
ENSG00000255856	RP11-87C12.5	3
ENSG00000256399	RP11-274J7.3	3
ENSG00000257624	RP1-128M12.3	3
ENSG00000258604	AL161668.5	3
ENSG00000259818	RP5-1024G6.7	3
ENSG00000261056	RP11-454F8.2	3
ENSG00000262686	GLIS2-AS1	3
ENSG00000266146	MIR5190	3
ENSG00000266730		3
ENSG00000266993	RP4-657D16.3	3
ENSG00000267011	CTB-50L17.16	3
ENSG00000267092	CTB-25B13.9	3
ENSG00000267479		3
ENSG00000268543	CTD-2619J13.16	3
ENSG00000271555	CTD-3214K23.1	3
ENSG00000272402	RP1-30M3.6	3
ENSG00000272958	CMP21-97G8.2	3
ENSG00000145476	CYP4V2	3
ENSG00000145879	SPINK7	3
ENSG00000146094	DOK3	3
ENSG00000163499	CRYBA2	3
ENSG00000164241	C5orf63	3
ENSG00000168260		3
ENSG00000177873	ZNF619	3
ENSG00000188883	KLRG2	3
ENSG00000197816	CCDC180	3
ENSG00000214022	REPIN1	3
ENSG00000224997		3
ENSG00000225369	AC009506.2	3
ENSG00000229352	AC007563.3	3
ENSG00000229833	PET100	3
ENSG00000229989	MIR181A1HG	3
ENSG00000231249	ITPR1-AS1	3
ENSG00000232640	RP1-266L20.2	3
ENSG00000233040	FAM204BP	3
ENSG00000233747	RPL36AP13	3
ENSG00000235151	AC114730.2	3
ENSG00000235695	RP11-395P16.1	3
ENSG00000236229	VEZF1P1	3
ENSG00000239002	SCARNA10	3
ENSG00000239701	RP3-461F17.1	3
ENSG00000240002	YBX1P3	3
ENSG00000254791	FAR1-IT1	3
ENSG00000257043	RP11-137N23.1	3
ENSG00000258561	RP11-72M17.1	3
ENSG00000263511	MIR5699	3
ENSG00000263753	LINC00667	3
ENSG00000076513	ANKRD13A	3
ENSG00000125122	LRRC29	3
ENSG00000137872	SEMA6D	3
ENSG00000151693	ASAP2	3
ENSG00000160191	PDE9A	3
ENSG00000184465	WDR27	3
ENSG00000198547	C20orf203	3
ENSG00000213057	C1orf220	3
ENSG00000214546	AC087491.2	3
ENSG00000232684	ATP11A-AS1	3
ENSG00000232713	AC010733.5	3
ENSG00000233266	HMGB1P31	3
ENSG00000236358	RP5-827C21.2	3
ENSG00000236905	RP11-348H3.2	3
ENSG00000237548	TTLL11-IT1	3
ENSG00000239445	ST3GAL6-AS1	3
ENSG00000254370	RP11-181B11.1	3
ENSG00000255186	RP11-514F3.5	3
ENSG00000256654	RP11-429A20.4	3
ENSG00000257194	RP11-567C2.1	3
ENSG00000261567	RP11-680G10.1	3
ENSG00000261970	RP11-342L8.2	3
ENSG00000264058	RP5-1028K7.3	3
ENSG00000267419	CTC-559E9.6	3
ENSG00000271868	RP11-1293J14.1	3
ENSG00000188732	FAM221A	3
ENSG00000213828		3
ENSG00000214772	RP11-174G6.1	3
ENSG00000215284	RP11-198M15.1	3
ENSG00000223152	RNU4-88P	3
ENSG00000224055	GAPDHP55	3
ENSG00000230069	LRRC37A15P	3
ENSG00000234050	LL0XNC01-237H1.3	3
ENSG00000236027	PATE3	3
ENSG00000238259	AC067940.1	3
ENSG00000260198	RP11-441F2.2	3
ENSG00000267529	RP11-53B2.1	3
ENSG00000267702	RP11-53B2.2	3
ENSG00000100376	FAM118A	3
ENSG00000101447	FAM83D	3
ENSG00000118557	PMFBP1	3
ENSG00000127483	HP1BP3	3
ENSG00000161640	SIGLEC11	3
ENSG00000162641	AKNAD1	3
ENSG00000169885	CALML6	3
ENSG00000182921	CCDC75P1	3
ENSG00000185792	NLRP9	3
ENSG00000200351	Y_RNA	3
ENSG00000203392	CTD-2026K11.6	3
ENSG00000204347	BTBD17	3
ENSG00000207361	RNU6-178P	3
ENSG00000224883	CTA-250D10.19	3
ENSG00000236758	MTUS2-AS2	3
ENSG00000237076	RP5-836J3.1	3
ENSG00000238947		3
ENSG00000239480	RP11-514P8.2	3
ENSG00000251414	RP11-843P14.1	3
ENSG00000261320	RP11-297D21.2	3
ENSG00000262209	PCDHGB3	3
ENSG00000262488	RP11-876N24.1	3
ENSG00000265500		3
ENSG00000101442	ACTR5	3
ENSG00000103995	CEP152	3
ENSG00000135315	CEP162	3
ENSG00000168283	BMI1	3
ENSG00000182985	CADM1	3
ENSG00000221944	TIGD1	3
ENSG00000225125	RANP4	3
ENSG00000226648	PLCG1-AS1	3
ENSG00000229780	UBE2Q1-AS1	3
ENSG00000246273	SBF2-AS1	3
ENSG00000256087	ZNF432	3
ENSG00000262484	CCER2	3
ENSG00000100393	EP300	3
ENSG00000124253	PCK1	3
ENSG00000170734	POLH	3
ENSG00000201343	Y_RNA	3
ENSG00000223436	AC011625.1	3
ENSG00000241220	RP11-292E2.1	3
ENSG00000250120	PCDHA10	3
ENSG00000266240	MIR5091	3
ENSG00000272002	RP11-557L19.1	3
ENSG00000080608	PUM3	4
ENSG00000164989	CCDC171	4
ENSG00000173124	ACSM6	4
ENSG00000178896	EXOSC4	4
ENSG00000227455	RP11-300M24.1	4
ENSG00000228828	RP11-162G10.1	4
ENSG00000243915	PRKRIRP2	4
ENSG00000246308	RP11-685M7.3	4
ENSG00000248429	RP11-597D13.9	4
ENSG00000260492	CISTR	4
ENSG00000261520	DLGAP1-AS5	4
ENSG00000272361	GS1-166A23.2	4
ENSG00000129173	E2F8	4
ENSG00000137285	TUBB2B	4
ENSG00000161040	FBXL13	4
ENSG00000165841	CYP2C19	4
ENSG00000173258	ZNF483	4
ENSG00000185324	CDK10	4
ENSG00000188542	DUSP28	4
ENSG00000223770	AC006145.4	4
ENSG00000231201	AF127577.11	4
ENSG00000231866	RP4-631H13.4	4
ENSG00000231952	DPY19L1P2	4
ENSG00000238975		4
ENSG00000248343	RP11-556G22.2	4
ENSG00000250148	KRT8P31	4
ENSG00000252277	SNORD116-30	4
ENSG00000254198	RP11-598P20.3	4
ENSG00000260070	RP11-182J23.1	4
ENSG00000261487	AC135048.13	4
ENSG00000267456	RP11-49I11.3	4
ENSG00000270139	AP001172.3	4
ENSG00000188958	UTS2B	4
ENSG00000197061	HIST1H4C	4
ENSG00000202198	RN7SK	4
ENSG00000202429	RNU4-48P	4
ENSG00000222024	AC004945.1	4
ENSG00000226465	RP13-401N8.1	4
ENSG00000226472	RP11-551L14.4	4
ENSG00000229695	AC011242.5	4
ENSG00000229956	ZRANB2-AS2	4
ENSG00000237135	DDX10P1	4
ENSG00000238922		4
ENSG00000260778	RP11-304L19.13	4
ENSG00000261476	RP11-77K12.3	4
ENSG00000267370	CTD-2623N2.3	4
ENSG00000269387	RP11-298J23.8	4
ENSG00000270141	TERC	4
ENSG00000168298	HIST1H1E	4
ENSG00000197977	ELOVL2	4
ENSG00000225885	AC023590.1	4
ENSG00000269846	RP4-621N11.2	4
ENSG00000005102	MEOX1	4
ENSG00000199005	MIR370	4
ENSG00000212428	SNORD115	4
ENSG00000213305	HNRNPCP6	4
ENSG00000231691	RP11-203F10.5	4
ENSG00000232916	HMGN2P27	4
ENSG00000252569	RNU6-1153P	4
ENSG00000253976	RP11-386G21.1	4
ENSG00000254787	CTD-2537O9.1	4
ENSG00000255396	AP000857.2	4
ENSG00000259055	RP11-1140I5.1	4
ENSG00000265142	MIR133A1HG	4
ENSG00000270066	SCARNA2	4
ENSG00000270814	TMEM261P1	4
ENSG00000235091	WI2-85898F10.1	4
ENSG00000107890	ANKRD26	4
ENSG00000147119	CHST7	4
ENSG00000084734	GCKR	5
ENSG00000108001	EBF3	5
ENSG00000127124	HIVEP3	5
ENSG00000134215	VAV3	5
ENSG00000137338	PGBD1	5
ENSG00000137860	SLC28A2	5
ENSG00000138399	FASTKD1	5
ENSG00000139180	NDUFA9	5
ENSG00000139508	SLC46A3	5
ENSG00000140876	NUDT7	5
ENSG00000143028	SYPL2	5
ENSG00000150893	FREM2	5
ENSG00000159714	ZDHHC1	5
ENSG00000162063	CCNF	5
ENSG00000164414	SLC35A1	5
ENSG00000168939	SPRY3	5
ENSG00000171129		5
ENSG00000181101	SDCCAG3P2	5
ENSG00000181315	ZNF322	5
ENSG00000182687	GALR2	5
ENSG00000184261	KCNK12	5
ENSG00000184313	MROH7	5
ENSG00000201969	SNORD115-20	5
ENSG00000206728	Y_RNA	5
ENSG00000215301	DDX3X	5
ENSG00000215397	SCRT2	5
ENSG00000218422		5
ENSG00000223878	AC005517.3	5
ENSG00000224613	RP11-153F1.1	5
ENSG00000231977	RP5-963E22.4	5
ENSG00000234492	RPL34-AS1	5
ENSG00000234773	CTD-2666L21.1	5
ENSG00000242082	RP1-90G24.10	5
ENSG00000246526	RP11-539L10.2	5
ENSG00000249286	AMD1P3	5
ENSG00000254281	KB-1507C5.4	5
ENSG00000267002	RP11-242D8.1	5
ENSG00000269483	AC006272.1	5
ENSG00000269883	RP11-463C8.7	5
ENSG00000270028	RP11-380L11.4	5
ENSG00000042781	USH2A	5
ENSG00000064835	POU1F1	5
ENSG00000104938	CLEC4M	5
ENSG00000105675	ATP4A	5
ENSG00000106077	ABHD11	5
ENSG00000118922	KLF12	5
ENSG00000119231	SENP5	5
ENSG00000139648	KRT71	5
ENSG00000146409	SLC18B1	5
ENSG00000165813	CCDC186	5
ENSG00000167103	PIP5KL1	5
ENSG00000167880	EVPL	5
ENSG00000169856	ONECUT1	5
ENSG00000175161	CADM2	5
ENSG00000177034	MTX3	5
ENSG00000179588	ZFPM1	5
ENSG00000180189	HMGB1P14	5
ENSG00000180537	RNF182	5
ENSG00000187166	H1FNT	5
ENSG00000196865	NHLRC2	5
ENSG00000196970	NXF4	5
ENSG00000198125	MB	5
ENSG00000207352	RNU6-540P	5
ENSG00000226314	ZNF192P1	5
ENSG00000226406	RBMX2P1	5
ENSG00000230188	RP11-405L18.4	5
ENSG00000231948	HS1BP3-IT1	5
ENSG00000232500	AP005273.1	5
ENSG00000236617	RP11-46H11.12	5
ENSG00000236942	RP11-6B6.3	5
ENSG00000237126	AC073254.1	5
ENSG00000239453	SIDT1-AS1	5
ENSG00000241223	RN7SL39P	5
ENSG00000241511	RPS15AP24	5
ENSG00000254441	RP11-718B12.5	5
ENSG00000255965	RP11-408I18.9	5
ENSG00000256001	RP11-575F12.2	5
ENSG00000256717	AP000797.3	5
ENSG00000257647	RP11-701H24.3	5
ENSG00000257837	RP11-263K4.4	5
ENSG00000259258	RP11-325L12.3	5
ENSG00000259296	RP11-313P18.1	5
ENSG00000260787		5
ENSG00000261096	RP11-690I21.2	5
ENSG00000261286	RP11-517C16.2	5
ENSG00000261425		5
ENSG00000261709	SNORA11	5
ENSG00000267532	MIR497HG	5
ENSG00000272699	RP11-145M9.5	5
ENSG00000273450	RP11-76P2.4	5
ENSG00000102870	ZNF629	5
ENSG00000130810	PPAN	5
ENSG00000175832	ETV4	5
ENSG00000178297	TMPRSS9	5
ENSG00000187715	KBTBD12	5
ENSG00000199567	Y_RNA	5
ENSG00000205309	NT5M	5
ENSG00000206417	H1FX-AS1	5
ENSG00000239627	RPL12P20	5
ENSG00000245317	CTC-241N9.1	5
ENSG00000254451	RP11-560G2.1	5
ENSG00000256902	IQSEC3P1	5
ENSG00000259361	LINC00927	5
ENSG00000266288	CTD-3096M3.2	5
ENSG00000271936	RP11-443B20.1	5
ENSG00000272717	RP11-342I1.2	5
ENSG00000038382	TRIO	5
ENSG00000105948	TTC26	5
ENSG00000109819	PPARGC1A	5
ENSG00000116652	DLEU2L	5
ENSG00000155897	ADCY8	5
ENSG00000157388	CACNA1D	5
ENSG00000163482	STK36	5
ENSG00000163808	KIF15	5
ENSG00000164398	ACSL6	5
ENSG00000164675	IQUB	5
ENSG00000166833	NAV2	5
ENSG00000175054	ATR	5
ENSG00000181773	GPR3	5
ENSG00000183833	MAATS1	5
ENSG00000196220	SRGAP3	5
ENSG00000206727	SNORD116-9	5
ENSG00000213315	CTD-3035D6.1	5
ENSG00000214548	MEG3	5
ENSG00000232057	AC093390.1	5
ENSG00000233012	HDAC1P2	5
ENSG00000234084	RP3-388E23.2	5
ENSG00000255571	MIR9-3HG	5
ENSG00000258399	MEG8	5
ENSG00000260196	RP1-239B22.5	5
ENSG00000264924	RP11-799B12.2	5
ENSG00000265204	RP11-403A21.3	5
ENSG00000268743	CTD-2538G9.5	5
ENSG00000105711	SCN1B	5
ENSG00000203397	RP13-36G14.3	5
ENSG00000207279	SNORD116-24	5
ENSG00000224671	RP11-335O13.8	5
ENSG00000228153	RP11-23I7.1	5
ENSG00000229110	AC006355.3	5
ENSG00000233757	AC092835.2	5
ENSG00000236356	AC079584.2	5
ENSG00000248719	RP11-377G16.2	5
ENSG00000251276	MAGI2-AS1	5
ENSG00000253302	STAU2-AS1	5
ENSG00000259690	CTD-3118D7.1	5
ENSG00000267632	RP11-400F19.18	5
ENSG00000201263	SNORD114-6	5
ENSG00000226375	RP3-395P12.2	5
ENSG00000258230	RP11-511H9.3	5
ENSG00000012061	ERCC1	5
ENSG00000171503	ETFDH	5
ENSG00000182606	TRAK1	5
ENSG00000223754	AC008073.9	5
ENSG00000238390	SNORA81	5
ENSG00000238755	RP11-23D24.2	5
ENSG00000117020	AKT3	5
ENSG00000225302	RP11-539I5.1	5
ENSG00000227598	RP1-167A14.2	5
ENSG00000231729	ARHGEF9-IT1	5
ENSG00000250041	CTD-2003C8.2	5
ENSG00000001617	SEMA3F	6
ENSG00000005381	MPO	6
ENSG00000061455	PRDM6	6
ENSG00000064666	CNN2	6
ENSG00000064787	BCAS1	6
ENSG00000065457	ADAT1	6
ENSG00000068001	HYAL2	6
ENSG00000069399	BCL3	6
ENSG00000077238	IL4R	6
ENSG00000077984	CST7	6
ENSG00000083896	YTHDC1	6
ENSG00000085265	FCN1	6
ENSG00000088827	SIGLEC1	6
ENSG00000088882	CPXM1	6
ENSG00000089012	SIRPG	6
ENSG00000090924	PLEKHG2	6
ENSG00000100209	HSCB	6
ENSG00000100403	ZC3H7B	6
ENSG00000100410	PHF5A	6
ENSG00000100453	GZMB	6
ENSG00000100599	RIN3	6
ENSG00000101276	SLC52A3	6
ENSG00000101307	SIRPB1	6
ENSG00000102034	ELF4	6
ENSG00000102755	FLT1	6
ENSG00000103335	PIEZO1	6
ENSG00000104870	FCGRT	6
ENSG00000105131	EPHX3	6
ENSG00000105227	PRX	6
ENSG00000105372	RPS19	6
ENSG00000106034	CPED1	6
ENSG00000108950	FAM20A	6
ENSG00000109743	BST1	6
ENSG00000110852	CLEC2B	6
ENSG00000111181	SLC6A12	6
ENSG00000111859	NEDD9	6
ENSG00000112303	VNN2	6
ENSG00000115616	SLC9A2	6
ENSG00000116157	GPX7	6
ENSG00000118520	ARG1	6
ENSG00000122420	PTGFR	6
ENSG00000122679	RAMP3	6
ENSG00000124107	SLPI	6
ENSG00000124593	PRICKLE4	6
ENSG00000127084	FGD3	6
ENSG00000128165	ADM2	6
ENSG00000129009	ISLR	6
ENSG00000129465	RIPK3	6
ENSG00000130589	HELZ2	6
ENSG00000130592	LSP1	6
ENSG00000131055	COX4I2	6
ENSG00000133106	EPSTI1	6
ENSG00000135111	TBX3	6
ENSG00000136936	XPA	6
ENSG00000137273	FOXF2	6
ENSG00000137752	CASP1	6
ENSG00000138356	AOX1	6
ENSG00000139567	ACVRL1	6
ENSG00000139679	LPAR6	6
ENSG00000140853	NLRC5	6
ENSG00000141506	PIK3R5	6
ENSG00000141756	FKBP10	6
ENSG00000141858	SAMD1	6
ENSG00000142534	RPS11	6
ENSG00000142552	RCN3	6
ENSG00000142676	RPL11	6
ENSG00000142937	RPS8	6
ENSG00000143320	CRABP2	6
ENSG00000143341	HMCN1	6
ENSG00000143416	SELENBP1	6
ENSG00000145741	BTF3	6
ENSG00000146677	AC004453.8	6
ENSG00000147168	IL2RG	6
ENSG00000148346	LCN2	6
ENSG00000149131	SERPING1	6
ENSG00000149573	MPZL2	6
ENSG00000151632	AKR1C2	6
ENSG00000152093	CFC1B	6
ENSG00000158270	COLEC12	6
ENSG00000159339	PADI4	6
ENSG00000160883	HK3	6
ENSG00000162244	RPL29	6
ENSG00000162654	GBP4	6
ENSG00000162894	FCMR	6
ENSG00000163220	S100A9	6
ENSG00000163221	S100A12	6
ENSG00000163563	MNDA	6
ENSG00000163565	IFI16	6
ENSG00000163909	HEYL	6
ENSG00000164308	ERAP2	6
ENSG00000164736	SOX17	6
ENSG00000165474	GJB2	6
ENSG00000165502	RPL36AL	6
ENSG00000166426	CRABP1	6
ENSG00000166441	RPL27A	6
ENSG00000166523	CLEC4E	6
ENSG00000166869	CHP2	6
ENSG00000166928	MS4A14	6
ENSG00000167157	PRRX2	6
ENSG00000168404	MLKL	6
ENSG00000170759	KIF5B	6
ENSG00000173193	PARP14	6
ENSG00000175390	EIF3F	6
ENSG00000175899	A2M	6
ENSG00000177363	LRRN4CL	6
ENSG00000178602	OTOS	6
ENSG00000181826	RELL1	6
ENSG00000182511	FES	6
ENSG00000183888	C1orf64	6
ENSG00000185201	IFITM2	6
ENSG00000185507	IRF7	6
ENSG00000185633	NDUFA4L2	6
ENSG00000185885	IFITM1	6
ENSG00000188783	PRELP	6
ENSG00000196154	S100A4	6
ENSG00000196329	GIMAP5	6
ENSG00000196917	HCAR1	6
ENSG00000196954	CASP4	6
ENSG00000197142	ACSL5	6
ENSG00000197766	CFD	6
ENSG00000198034	RPS4X	6
ENSG00000198951	NAGA	6
ENSG00000204311	DFNB59	6
ENSG00000204540	PSORS1C1	6
ENSG00000213928	IRF9	6
ENSG00000214016	RPSAP61	6
ENSG00000218426	RP11-475C16.1	6
ENSG00000223548	AC034228.3	6
ENSG00000224100	AP001630.5	6
ENSG00000226221	RPL26P19	6
ENSG00000226680	RP11-61D3.1	6
ENSG00000227116	RP3-471C18.1	6
ENSG00000227997		6
ENSG00000232040	ZBED9	6
ENSG00000234418	RP11-560I19.1	6
ENSG00000235290	HLA-W	6
ENSG00000235565		6
ENSG00000235897	TM4SF19-AS1	6
ENSG00000237424	FOXD2-AS1	6
ENSG00000238000	RP11-274E7.2	6
ENSG00000242136	RP11-734K21.2	6
ENSG00000242325	RPS12P31	6
ENSG00000242798	RP11-506M12.1	6
ENSG00000249307	LINC01088	6
ENSG00000249740	OSMR-AS1	6
ENSG00000253395	KB-1460A1.1	6
ENSG00000253642	RP11-317N12.1	6
ENSG00000255503	RP11-113K21.4	6
ENSG00000260944	FOXC2-AS1	6
ENSG00000261612	SUB1P3	6
ENSG00000268800		6
ENSG00000272403		6
ENSG00000003400	CASP10	6
ENSG00000004777	ARHGAP33	6
ENSG00000005243	COPZ2	6
ENSG00000010030	ETV7	6
ENSG00000018625	ATP1A2	6
ENSG00000025434	NR1H3	6
ENSG00000027869	SH2D2A	6
ENSG00000054219	LY75	6
ENSG00000057294	PKP2	6
ENSG00000064490	RFXANK	6
ENSG00000072163	LIMS2	6
ENSG00000073282	TP63	6
ENSG00000076928	ARHGEF1	6
ENSG00000087589	CASS4	6
ENSG00000089327	FXYD5	6
ENSG00000090104	RGS1	6
ENSG00000091262	ABCC6	6
ENSG00000091592	NLRP1	6
ENSG00000094963	FMO2	6
ENSG00000096696	DSP	6
ENSG00000099840	IZUMO4	6
ENSG00000100979	PLTP	6
ENSG00000102349	KLF8	6
ENSG00000105894	PTN	6
ENSG00000106541	AGR2	6
ENSG00000106560	GIMAP2	6
ENSG00000108622	ICAM2	6
ENSG00000108821	COL1A1	6
ENSG00000110848	CD69	6
ENSG00000111321	LTBR	6
ENSG00000111832	RWDD1	6
ENSG00000112414	ADGRG6	6
ENSG00000113263	ITK	6
ENSG00000113504	SLC12A7	6
ENSG00000115165	CYTIP	6
ENSG00000115594	IL1R1	6
ENSG00000115648	MLPH	6
ENSG00000116701	NCF2	6
ENSG00000116711	PLA2G4A	6
ENSG00000116824	CD2	6
ENSG00000117091	CD48	6
ENSG00000121966	CXCR4	6
ENSG00000122176	FMOD	6
ENSG00000123453	SARDH	6
ENSG00000126218	F10	6
ENSG00000127083	OMD	6
ENSG00000128052	KDR	6
ENSG00000128567	PODXL	6
ENSG00000128606	LRRC17	6
ENSG00000129467	ADCY4	6
ENSG00000129474	AJUBA	6
ENSG00000130052	STARD8	6
ENSG00000130158	DOCK6	6
ENSG00000131634	TMEM204	6
ENSG00000131981	LGALS3	6
ENSG00000132530	XAF1	6
ENSG00000132622	HSPA12B	6
ENSG00000134955	SLC37A2	6
ENSG00000135917	SLC19A3	6
ENSG00000136634	IL10	6
ENSG00000137868	STRA6	6
ENSG00000138722	MMRN1	6
ENSG00000142910	TINAGL1	6
ENSG00000143867	OSR1	6
ENSG00000144891	AGTR1	6
ENSG00000148175	STOM	6
ENSG00000148935	GAS2	6
ENSG00000149564	ESAM	6
ENSG00000149716	ORAOV1	6
ENSG00000151702	FLI1	6
ENSG00000152430	BOLL	6
ENSG00000153162	BMP6	6
ENSG00000153283	CD96	6
ENSG00000153446	C16orf89	6
ENSG00000154645	CHODL	6
ENSG00000154721	JAM2	6
ENSG00000155962	CLIC2	6
ENSG00000157833	GAREM2	6
ENSG00000158296	SLC13A3	6
ENSG00000160111	CPAMD8	6
ENSG00000161653	NAGS	6
ENSG00000161940	BCL6B	6
ENSG00000162739	SLAMF6	6
ENSG00000162998	FRZB	6
ENSG00000163072	NOSTRIN	6
ENSG00000163154	TNFAIP8L2	6
ENSG00000164181	ELOVL7	6
ENSG00000164318	EGFLAM	6
ENSG00000164867	NOS3	6
ENSG00000165501	LRR1	6
ENSG00000167280	ENGASE	6
ENSG00000167994	RAB3IL1	6
ENSG00000168062	BATF2	6
ENSG00000168229	PTGDR	6
ENSG00000168685	IL7R	6
ENSG00000168913	ENHO	6
ENSG00000170577	SIX2	6
ENSG00000171989	LDHAL6B	6
ENSG00000172116	CD8B	6
ENSG00000172197	MBOAT1	6
ENSG00000172296	SPTLC3	6
ENSG00000172458	IL17D	6
ENSG00000173068	BNC2	6
ENSG00000173269	MMRN2	6
ENSG00000176435	CLEC14A	6
ENSG00000177374	HIC1	6
ENSG00000179776	CDH5	6
ENSG00000179921	GPBAR1	6
ENSG00000180447	GAS1	6
ENSG00000180785	OR51E1	6
ENSG00000181381	DDX60L	6
ENSG00000182718	ANXA2	6
ENSG00000183098	GPC6	6
ENSG00000184113	CLDN5	6
ENSG00000184371	CSF1	6
ENSG00000184925	LCN12	6
ENSG00000185187	SIGIRR	6
ENSG00000186564	FOXD2	6
ENSG00000187244	BCAM	6
ENSG00000188338	SLC38A3	6
ENSG00000196968	FUT11	6
ENSG00000197901	SLC22A6	6
ENSG00000198851	CD3E	6
ENSG00000200247	RNU6-254P	6
ENSG00000203813		6
ENSG00000206190	ATP10A	6
ENSG00000212296	SNORD72	6
ENSG00000212567	SNORA57	6
ENSG00000217702	RP11-287D1.4	6
ENSG00000224251	RP11-499O7.7	6
ENSG00000228401	RP11-251M1.1	6
ENSG00000230595	RSL24D1P2	6
ENSG00000230870	FBXW11P1	6
ENSG00000232453	RP4-794H19.1	6
ENSG00000236686	BZW1P1	6
ENSG00000241839	PLEKHO2	6
ENSG00000243663	RPS4XP14	6
ENSG00000244734	HBB	6
ENSG00000257660	RP11-579D7.4	6
ENSG00000258486		6
ENSG00000259351	RP11-111E14.1	6
ENSG00000259579	RP11-66B24.5	6
ENSG00000261040	WFDC21P	6
ENSG00000267040	RP11-35G9.3	6
ENSG00000267416	CTD-2319I12.2	6
ENSG00000268388	FENDRR	6
ENSG00000269720	CTD-2521M24.5	6
ENSG00000272144	CTD-2035E11.5	6
ENSG00000272831	RP11-792A8.4	6
ENSG00000100028	SNRPD3	6
ENSG00000133328	HRASLS2	6
ENSG00000149743	TRPT1	6
ENSG00000164334	FAM170A	6
ENSG00000173585	CCR9	6
ENSG00000176515	RP5-856G1.2	6
ENSG00000183347	GBP6	6
ENSG00000214872	SMTNL1	6
ENSG00000215644	GCGR	6
ENSG00000219755	RP1-199J3.5	6
ENSG00000225693	LAGE3P1	6
ENSG00000226925	AC007271.3	6
ENSG00000228043	AC097721.2	6
ENSG00000250432	RP11-834C11.5	6
ENSG00000251361	CTD-2091N23.1	6
ENSG00000254343	RP11-760H22.2	6
ENSG00000256351	RP1-7G5.5	6
ENSG00000259915	RP11-410E4.1	6
ENSG00000267571	AC104532.4	6
ENSG00000272729	RP11-387A1.5	6
ENSG00000013364	MVP	6
ENSG00000104918	RETN	6
ENSG00000106809	OGN	6
ENSG00000110700	RPS13	6
ENSG00000111077	TNS2	6
ENSG00000112306	RPS12	6
ENSG00000115053	NCL	6
ENSG00000123146	ADGRE5	6
ENSG00000123200	ZC3H13	6
ENSG00000126653	NSRP1	6
ENSG00000130307	USHBP1	6
ENSG00000130811	EIF3G	6
ENSG00000138326	RPS24	6
ENSG00000146477	SLC22A3	6
ENSG00000147403	RPL10	6
ENSG00000151247	EIF4E	6
ENSG00000155792	DEPTOR	6
ENSG00000161016	RPL8	6
ENSG00000163297	ANTXR2	6
ENSG00000163666	HESX1	6
ENSG00000165862		6
ENSG00000178464	CTD-2192J16.15	6
ENSG00000181638	ZFP41	6
ENSG00000183066	WBP2NL	6
ENSG00000205930	C21orf62-AS1	6
ENSG00000222020	AC062017.1	6
ENSG00000235590	GNAS-AS1	6
ENSG00000241413	RN7SL441P	6
ENSG00000247993	FOXD1-AS1	6
ENSG00000259275	RP11-522B15.3	6
ENSG00000260342	RP11-1035H13.3	6
ENSG00000260833		6
ENSG00000261827		6
ENSG00000265455	MIR4700	6
ENSG00000101425	BPI	6
ENSG00000112299	VNN1	6
ENSG00000112837	TBX18	6
ENSG00000138039	LHCGR	6
ENSG00000145777	TSLP	6
ENSG00000147443	DOK2	6
ENSG00000147606	SLC26A7	6
ENSG00000163421	PROK2	6
ENSG00000163736	PPBP	6
ENSG00000164692	COL1A2	6
ENSG00000166825	ANPEP	6
ENSG00000169583	CLIC3	6
ENSG00000171227	TMEM37	6
ENSG00000187753	C9orf153	6
ENSG00000198912	C1orf174	6
ENSG00000217027	TPT1P4	6
ENSG00000250132	RP11-359B12.2	6
ENSG00000268618	AC092316.1	6
ENSG00000269148	AC092301.3	6
ENSG00000271020	RP11-10C24.1	6
ENSG00000086548	CEACAM6	6
ENSG00000162881	OXER1	6
ENSG00000185339	TCN2	6
ENSG00000205832	C16orf96	6
ENSG00000231518	RP11-327L3.3	6
ENSG00000262903	RP11-235E17.6	6
ENSG00000267534	S1PR2	6
ENSG00000117616	RSRP1	6
ENSG00000122406	RPL5	6
ENSG00000144644	GADL1	6
ENSG00000149806	FAU	6
ENSG00000218510	LINC00339	6
ENSG00000226833	AC097724.3	6
ENSG00000017483	SLC38A5	6
ENSG00000101280	ANGPT4	6
ENSG00000112175	BMP5	6
ENSG00000123243	ITIH5	6
ENSG00000125384	PTGER2	6
ENSG00000177076	ACER2	6
ENSG00000188176	SMTNL2	6
ENSG00000227210	AC079145.4	6
ENSG00000238058	RP11-432J22.2	6
ENSG00000251692	PTX4	6
ENSG00000266934	RP11-332H18.3	6
ENSG00000001461	NIPAL3	7
ENSG00000012211	PRICKLE3	7
ENSG00000015171	ZMYND11	7
ENSG00000063046	EIF4B	7
ENSG00000078814	MYH7B	7
ENSG00000099282	TSPAN15	7
ENSG00000100316	RPL3	7
ENSG00000105373	GLTSCR2	7
ENSG00000112144	ICK	7
ENSG00000115827	DCAF17	7
ENSG00000118322	ATP10B	7
ENSG00000122432	SPATA1	7
ENSG00000124570	SERPINB6	7
ENSG00000128016	ZFP36	7
ENSG00000130669	PAK4	7
ENSG00000135547	HEY2	7
ENSG00000142627	EPHA2	7
ENSG00000144026	ZNF514	7
ENSG00000146592	CREB5	7
ENSG00000147488	ST18	7
ENSG00000147536	GINS4	7
ENSG00000148158	SNX30	7
ENSG00000152292	SH2D6	7
ENSG00000153093	ACOXL	7
ENSG00000157653	C9orf43	7
ENSG00000160298	C21orf58	7
ENSG00000160307	S100B	7
ENSG00000165476	REEP3	7
ENSG00000166428	PLD4	7
ENSG00000166508	MCM7	7
ENSG00000166796	LDHC	7
ENSG00000166845	C18orf54	7
ENSG00000169926	KLF13	7
ENSG00000170291	ELP5	7
ENSG00000170537	TMC7	7
ENSG00000172824	CES4A	7
ENSG00000172890	NADSYN1	7
ENSG00000174137	FAM53A	7
ENSG00000175309	PHYKPL	7
ENSG00000177989	ODF3B	7
ENSG00000179364	PACS2	7
ENSG00000181847	TIGIT	7
ENSG00000184678	HIST2H2BE	7
ENSG00000185753	CXorf38	7
ENSG00000187242	KRT12	7
ENSG00000205085	FAM71F2	7
ENSG00000205639	MFSD2B	7
ENSG00000213433	RPLP1P6	7
ENSG00000214013	GANC	7
ENSG00000214954	LRRC69	7
ENSG00000215210	RBMXP2	7
ENSG00000220472	RP11-69L16.5	7
ENSG00000222044	RP5-1039K5.16	7
ENSG00000223745	CCDC18-AS1	7
ENSG00000224931	AC152010.1	7
ENSG00000225093	RPL3P7	7
ENSG00000225485		7
ENSG00000226086	EIF3LP3	7
ENSG00000226427	HMGN2P7	7
ENSG00000226786	RP1-167F1.2	7
ENSG00000228205	RP11-778D9.4	7
ENSG00000228716	DHFR	7
ENSG00000230457	PA2G4P4	7
ENSG00000235703	LINC00894	7
ENSG00000239922	RP11-71N10.1	7
ENSG00000240376	RP11-36C20.1	7
ENSG00000241416	KRT8P13	7
ENSG00000242498	ARPIN	7
ENSG00000245729	RP11-480D4.1	7
ENSG00000245888	FLJ21408	7
ENSG00000250260	RP11-325L7.2	7
ENSG00000253051	SNORA31	7
ENSG00000255031	RP11-802E16.3	7
ENSG00000257877		7
ENSG00000259236	GOLGA8VP	7
ENSG00000259502	RP11-643G16.3	7
ENSG00000259648	RP11-643G16.4	7
ENSG00000261490	RP11-448G15.3	7
ENSG00000263013	RP11-876N24.5	7
ENSG00000263361	MIR378H	7
ENSG00000263843	RP11-649A18.12	7
ENSG00000264808	RP11-802D6.1	7
ENSG00000268006	PTOV1-AS1	7
ENSG00000269473	CTD-2619J13.19	7
ENSG00000271780	RP11-1017G21.5	7
ENSG00000271786		7
ENSG00000272950	RP11-307C18.1	7
ENSG00000273030	RP11-285F16.1	7
ENSG00000007384	RHBDF1	7
ENSG00000026950	BTN3A1	7
ENSG00000066923	STAG3	7
ENSG00000072310	SREBF1	7
ENSG00000075234	TTC38	7
ENSG00000087266	SH3BP2	7
ENSG00000089159	PXN	7
ENSG00000100053	CRYBB3	7
ENSG00000100312	ACR	7
ENSG00000100802	C14orf93	7
ENSG00000114315	HES1	7
ENSG00000125520	SLC2A4RG	7
ENSG00000128805	ARHGAP22	7
ENSG00000137460	FHDC1	7
ENSG00000138380	CARF	7
ENSG00000141141		7
ENSG00000149257	SERPINH1	7
ENSG00000163884	KLF15	7
ENSG00000164050	PLXNB1	7
ENSG00000164849	GPR146	7
ENSG00000167261	DPEP2	7
ENSG00000167562	ZNF701	7
ENSG00000173281	PPP1R3B	7
ENSG00000174165	ZDHHC24	7
ENSG00000175544	CABP4	7
ENSG00000177683	THAP5	7
ENSG00000178636	RP11-455G16.1	7
ENSG00000182359	KBTBD3	7
ENSG00000185736	ADARB2	7
ENSG00000186635	ARAP1	7
ENSG00000187838	TMEM256-PLSCR3	7
ENSG00000198753	PLXNB3	7
ENSG00000200528	RNU6-1331P	7
ENSG00000213903	LTB4R	7
ENSG00000223513	ATP6V0E1P2	7
ENSG00000223575	RBMX2P3	7
ENSG00000225938	RP4-575N6.4	7
ENSG00000228204	RP4-724E13.2	7
ENSG00000230454	U73166.2	7
ENSG00000230461	PROX1-AS1	7
ENSG00000231170	AC002451.3	7
ENSG00000232725	U52111.14	7
ENSG00000234690	AC073283.4	7
ENSG00000238227	C9orf69	7
ENSG00000244879	GABPB1-AS1	7
ENSG00000249476	CTD-2587M2.1	7
ENSG00000251795		7
ENSG00000253426	RP11-10A14.4	7
ENSG00000255837	TAS2R20	7
ENSG00000256469	RP11-856F16.2	7
ENSG00000259172	RP11-299G20.2	7
ENSG00000260729	RP11-106M3.2	7
ENSG00000262468	LINC01569	7
ENSG00000264937	AC100830.5	7
ENSG00000272858	CTA-292E10.8	7
ENSG00000004864	SLC25A13	7
ENSG00000010292	NCAPD2	7
ENSG00000010318	PHF7	7
ENSG00000092421	SEMA6A	7
ENSG00000102967	DHODH	7
ENSG00000109846	CRYAB	7
ENSG00000140538	NTRK3	7
ENSG00000143409	FAM63A	7
ENSG00000147874	HAUS6	7
ENSG00000164323	CFAP97	7
ENSG00000166323	C11orf65	7
ENSG00000179766	ATP8B5P	7
ENSG00000180902	D2HGDH	7
ENSG00000187037	GPR141	7
ENSG00000188878	FBF1	7
ENSG00000198740	ZNF652	7
ENSG00000213742	ZNF337-AS1	7
ENSG00000221826	PSG3	7
ENSG00000227533	SLC2A1-AS1	7
ENSG00000233237	LINC00472	7
ENSG00000236700	LINC01010	7
ENSG00000240616	RPS6P25	7
ENSG00000245975	RP11-30K9.6	7
ENSG00000262758		7
ENSG00000269302		7
ENSG00000272525	RP11-79P5.9	7
ENSG00000006062	MAP3K14	7
ENSG00000009954	BAZ1B	7
ENSG00000066855	MTFR1	7
ENSG00000075711	DLG1	7
ENSG00000100139	MICALL1	7
ENSG00000100842	EFS	7
ENSG00000107485	GATA3	7
ENSG00000108349	CASC3	7
ENSG00000112561	TFEB	7
ENSG00000116198	CEP104	7
ENSG00000122694	GLIPR2	7
ENSG00000124224	PPP4R1L	7
ENSG00000125820	NKX2-2	7
ENSG00000128346	C22orf23	7
ENSG00000135414	GDF11	7
ENSG00000141971	MVB12A	7
ENSG00000142541	RPL13A	7
ENSG00000165912	PACSIN3	7
ENSG00000167900	TK1	7
ENSG00000170190	SLC16A5	7
ENSG00000170802	FOXN2	7
ENSG00000173473	SMARCC1	7
ENSG00000173848	NET1	7
ENSG00000173894	CBX2	7
ENSG00000177721	ANXA2R	7
ENSG00000178764	ZHX2	7
ENSG00000180481	GLIPR1L2	7
ENSG00000183077	AFMID	7
ENSG00000184014	DENND5A	7
ENSG00000196535	MYO18A	7
ENSG00000197013	ZNF429	7
ENSG00000204673	AKT1S1	7
ENSG00000213073	RP11-288H12.3	7
ENSG00000213390	ARHGAP19	7
ENSG00000213463	SYNJ2BP	7
ENSG00000214846	RP11-115L11.1	7
ENSG00000229645		7
ENSG00000231327	AC016700.5	7
ENSG00000235397	EPN2-AS1	7
ENSG00000259498	RP11-244F12.3	7
ENSG00000260029	RP11-401P9.1	7
ENSG00000261357	RP11-626G11.1	7
ENSG00000261685	RP11-401P9.4	7
ENSG00000268379	CTC-360J11.4	7
ENSG00000087076	HSD17B14	7
ENSG00000147274	RBMX	7
ENSG00000213744	RPS10P14	7
ENSG00000234788	HSPA8P3	7
ENSG00000247735	CTD-2574D22.2	7
ENSG00000087274	ADD1	7
ENSG00000092036	HAUS4	7
ENSG00000108839	ALOX12	7
ENSG00000143624	INTS3	7
ENSG00000147853	AK3	7
ENSG00000173209	AHSA2	7
ENSG00000174792	C4orf26	7
ENSG00000197497	ZNF665	7
ENSG00000243404	RPL35AP32	7
ENSG00000260509	RP11-271M24.2	7
ENSG00000262227	RP5-1050D4.5	7
ENSG00000266445	RP13-991F5.2	7
ENSG00000266714	MYO15B	7
ENSG00000271631	RP11-408O19.5	7
ENSG00000089060	SLC8B1	7
ENSG00000180900	SCRIB	7
ENSG00000089041	P2RX7	7
ENSG00000156030	ELMSAN1	7
ENSG00000231509	RP11-574F11.3	7
ENSG00000242357		7
ENSG00000242689	CNTF	7
ENSG00000265264	TIMM10B	7
ENSG00000005844	ITGAL	8
ENSG00000019549	SNAI2	8
ENSG00000049247	UTS2	8
ENSG00000063177	RPL18	8
ENSG00000074047	GLI2	8
ENSG00000074621	SLC24A1	8
ENSG00000078061	ARAF	8
ENSG00000083845	RPS5	8
ENSG00000102007	PLP2	8
ENSG00000105483	CARD8	8
ENSG00000106333	PCOLCE	8
ENSG00000108387	2018-09-04	8
ENSG00000111713	GYS2	8
ENSG00000111886	GABRR2	8
ENSG00000112378	PERP	8
ENSG00000112511	PHF1	8
ENSG00000113141	IK	8
ENSG00000114391	RPL24	8
ENSG00000116251	RPL22	8
ENSG00000126456	IRF3	8
ENSG00000127951	FGL2	8
ENSG00000132970	WASF3	8
ENSG00000135486	HNRNPA1	8
ENSG00000137496	IL18BP	8
ENSG00000139613	SMARCC2	8
ENSG00000139626	ITGB7	8
ENSG00000149273	RPS3	8
ENSG00000151651	ADAM8	8
ENSG00000153790	C7orf31	8
ENSG00000155085	AK9	8
ENSG00000159173	TNNI1	8
ENSG00000161618	ALDH16A1	8
ENSG00000162997	PRORSD1P	8
ENSG00000164136	IL15	8
ENSG00000164385	LINC01600	8
ENSG00000164879	CA3	8
ENSG00000167515	TRAPPC2L	8
ENSG00000167720	SRR	8
ENSG00000168060	NAALADL1	8
ENSG00000170779	CDCA4	8
ENSG00000177042	TMEM80	8
ENSG00000177410	ZFAS1	8
ENSG00000178038	ALS2CL	8
ENSG00000178093	TSSK6	8
ENSG00000179580	RNF151	8
ENSG00000179846	NKPD1	8
ENSG00000179943	FIZ1	8
ENSG00000182899	RPL35A	8
ENSG00000185298	CCDC137	8
ENSG00000186660	ZFP91	8
ENSG00000197958	RPL12	8
ENSG00000197989	SNHG12	8
ENSG00000198821	CD247	8
ENSG00000198830	HMGN2	8
ENSG00000198837	DENND4B	8
ENSG00000203684	IBA57-AS1	8
ENSG00000204528	PSORS1C3	8
ENSG00000205464	ATP6AP1L	8
ENSG00000213088	ACKR1	8
ENSG00000213402	PTPRCAP	8
ENSG00000214293	APTR	8
ENSG00000214535	RPS15AP1	8
ENSG00000223695	RP4-633O19__A.1	8
ENSG00000224699	LAMTOR5-AS1	8
ENSG00000226158	CLCP2	8
ENSG00000226823	SUGT1P	8
ENSG00000227165	WDR11-AS1	8
ENSG00000227908	FLJ31104	8
ENSG00000233631		8
ENSG00000235734	HMGN1P36	8
ENSG00000236953	ZDHHC20-IT1	8
ENSG00000247982	LINC00926	8
ENSG00000249306	LINC01411	8
ENSG00000250325	IGBP1P4	8
ENSG00000255670	RP11-253I19.3	8
ENSG00000260077	RP11-254F7.2	8
ENSG00000263264	CTB-133G6.1	8
ENSG00000266712	AC090810.1	8
ENSG00000270599		8
ENSG00000271070	GMCL1P2	8
ENSG00000273210	AP001437.1	8
ENSG00000027644	INSRR	8
ENSG00000064989	CALCRL	8
ENSG00000087074	PPP1R15A	8
ENSG00000100299	ARSA	8
ENSG00000101342	TLDC2	8
ENSG00000103202	NME4	8
ENSG00000105538	RASIP1	8
ENSG00000105639	JAK3	8
ENSG00000109113	RAB34	8
ENSG00000111729	CLEC4A	8
ENSG00000113070	HBEGF	8
ENSG00000120129	DUSP1	8
ENSG00000121152	NCAPH	8
ENSG00000124256	ZBP1	8
ENSG00000124440	HIF3A	8
ENSG00000125734	GPR108	8
ENSG00000128917	DLL4	8
ENSG00000132357	CARD6	8
ENSG00000132688	NES	8
ENSG00000134827	TCN1	8
ENSG00000136877	FPGS	8
ENSG00000138794	CASP6	8
ENSG00000143127	ITGA10	8
ENSG00000144908	ALDH1L1	8
ENSG00000160796	NBEAL2	8
ENSG00000165795	NDRG2	8
ENSG00000165816	VWA2	8
ENSG00000166979	EVA1C	8
ENSG00000167207	NOD2	8
ENSG00000167483	FAM129C	8
ENSG00000168010	ATG16L2	8
ENSG00000168476	REEP4	8
ENSG00000170144	HNRNPA3	8
ENSG00000170545	SMAGP	8
ENSG00000171428	NAT1	8
ENSG00000173039	RELA	8
ENSG00000174680	GRIK1-AS1	8
ENSG00000177082	WDR73	8
ENSG00000178723	GLULP4	8
ENSG00000179454	KLHL28	8
ENSG00000185697	MYBL1	8
ENSG00000188086	PRSS45	8
ENSG00000188305	C19orf35	8
ENSG00000198542	ITGBL1	8
ENSG00000198723	C19orf45	8
ENSG00000217930	PAM16	8
ENSG00000225377	NRSN2-AS1	8
ENSG00000225697	SLC26A6	8
ENSG00000226308	RP4-813D12.3	8
ENSG00000226752	PSMD5-AS1	8
ENSG00000231795	ITCH-IT1	8
ENSG00000231942	HNRNPA1P36	8
ENSG00000232075	MRPL35P2	8
ENSG00000233351	RP1-69D17.3	8
ENSG00000233503	HNRNPLP1	8
ENSG00000233569	RP11-500B12.1	8
ENSG00000236810	TCEB3-AS1	8
ENSG00000241131	RP11-639B1.1	8
ENSG00000243364	EFNA4	8
ENSG00000243646	IL10RB	8
ENSG00000243795	RP11-572M11.3	8
ENSG00000249502	AC006160.5	8
ENSG00000250365	CTD-2213F21.2	8
ENSG00000252915	Y_RNA	8
ENSG00000255062	RP11-712L6.5	8
ENSG00000255462	RP11-483L5.1	8
ENSG00000267108	RP11-861E21.1	8
ENSG00000088451	TGDS	8
ENSG00000108592	FTSJ3	8
ENSG00000173875	ZNF791	8
ENSG00000183048	SLC25A10	8
ENSG00000205208	C4orf46	8
ENSG00000228439	TSTD3	8
ENSG00000230160	AC004854.5	8
ENSG00000239642	MEIKIN	8
ENSG00000240463	RPS19P3	8
ENSG00000267920	SNX6P1	8
ENSG00000070778	PTPN21	8
ENSG00000092841	MYL6	8
ENSG00000105011	ASF1B	8
ENSG00000107672	NSMCE4A	8
ENSG00000119950	MXI1	8
ENSG00000120458	MSANTD2	8
ENSG00000128951	DUT	8
ENSG00000132275	RRP8	8
ENSG00000134086	VHL	8
ENSG00000136193	SCRN1	8
ENSG00000143458	GABPB2	8
ENSG00000162191	UBXN1	8
ENSG00000167526	RPL13	8
ENSG00000167608	TMC4	8
ENSG00000167635	ZNF146	8
ENSG00000170954	ZNF415	8
ENSG00000171443	ZNF524	8
ENSG00000177954	RPS27	8
ENSG00000203943	SAMD13	8
ENSG00000228386	RP5-1125A11.4	8
ENSG00000234160	RP11-613M10.6	8
ENSG00000235162	C12orf75	8
ENSG00000271228	CTC-336P14.1	8
ENSG00000272143	FGF14-AS2	8
ENSG00000272909	CTD-2555O16.4	8
ENSG00000129696	TTI2	8
ENSG00000134242	PTPN22	8
ENSG00000153071	DAB2	8
ENSG00000166483	WEE1	8
ENSG00000172935	MRGPRF	8
ENSG00000221838	AP4M1	8
ENSG00000259182	RP11-424I19.2	8
ENSG00000002016	RAD52	8
ENSG00000006025	OSBPL7	8
ENSG00000128272	ATF4	8
ENSG00000144182	LIPT1	8
ENSG00000170581	STAT2	8
ENSG00000269094		8
ENSG00000138735	PDE5A	8
ENSG00000228323	AC008753.6	8
ENSG00000231851	UTAT33	8
ENSG00000251405	CTB-109A12.1	8
ENSG00000005421	PON1	9
ENSG00000007237	GAS7	9
ENSG00000015520	NPC1L1	9
ENSG00000017373		9
ENSG00000025423	HSD17B6	9
ENSG00000054654	SYNE2	9
ENSG00000065978	YBX1	9
ENSG00000067836	ROGDI	9
ENSG00000072778	ACADVL	9
ENSG00000074657	ZNF532	9
ENSG00000081818	PCDHB4	9
ENSG00000086730	LAT2	9
ENSG00000092929	UNC13D	9
ENSG00000099954	CECR2	9
ENSG00000100479	POLE2	9
ENSG00000100968	NFATC4	9
ENSG00000102225	CDK16	9
ENSG00000104147	OIP5	9
ENSG00000105229	PIAS4	9
ENSG00000108830	RND2	9
ENSG00000111644	ACRBP	9
ENSG00000111664	GNB3	9
ENSG00000114779	ABHD14B	9
ENSG00000115425	PECR	9
ENSG00000117707	PROX1	9
ENSG00000120471	TP53AIP1	9
ENSG00000120519	SLC10A7	9
ENSG00000120645	IQSEC3	9
ENSG00000122386	ZNF205	9
ENSG00000122756	CNTFR	9
ENSG00000123191	ATP7B	9
ENSG00000124713	GNMT	9
ENSG00000125633	CCDC93	9
ENSG00000125772	GPCPD1	9
ENSG00000126790	L3HYPDH	9
ENSG00000127863	TNFRSF19	9
ENSG00000130988	RGN	9
ENSG00000132436	FIGNL1	9
ENSG00000132819	RBM38	9
ENSG00000135824	RGS8	9
ENSG00000137766	UNC13C	9
ENSG00000139631	CSAD	9
ENSG00000140254	DUOXA1	9
ENSG00000140279	DUOX2	9
ENSG00000140968	IRF8	9
ENSG00000141294	LRRC46	9
ENSG00000141580	WDR45B	9
ENSG00000144034	TPRKB	9
ENSG00000145194	ECE2	9
ENSG00000148019	CEP78	9
ENSG00000151692	RNF144A	9
ENSG00000152527	PLEKHH2	9
ENSG00000153563	CD8A	9
ENSG00000154274	C4orf19	9
ENSG00000154358	OBSCN	9
ENSG00000154485	MMP21	9
ENSG00000156510	HKDC1	9
ENSG00000159055	MIS18A	9
ENSG00000159263	SIM2	9
ENSG00000161265	U2AF1L4	9
ENSG00000161999	JMJD8	9
ENSG00000162004	CCDC78	9
ENSG00000162650	ATXN7L2	9
ENSG00000162931	TRIM17	9
ENSG00000163082	SGPP2	9
ENSG00000164037	SLC9B1	9
ENSG00000164764	SBSPON	9
ENSG00000165124	SVEP1	9
ENSG00000165801	ARHGEF40	9
ENSG00000166341	DCHS1	9
ENSG00000167984	NLRC3	9
ENSG00000170638	TRABD	9
ENSG00000171777	RASGRP4	9
ENSG00000172936	MYD88	9
ENSG00000173531	MST1	9
ENSG00000173621	LRFN4	9
ENSG00000174038	C9orf131	9
ENSG00000174111		9
ENSG00000174231	PRPF8	9
ENSG00000174365	SNHG11	9
ENSG00000174715	RP11-79L9.2	9
ENSG00000175611	LINC00476	9
ENSG00000176054	RPL23P2	9
ENSG00000176723	ZNF843	9
ENSG00000179071	CCDC89	9
ENSG00000179342	GS1-124K5.9	9
ENSG00000179698	WDR97	9
ENSG00000179832	MROH1	9
ENSG00000182376	RP5-1142A6.8	9
ENSG00000183941		9
ENSG00000184551		9
ENSG00000185028	LRRC14B	9
ENSG00000185033	SEMA4B	9
ENSG00000185053	SGCZ	9
ENSG00000185958	FAM186A	9
ENSG00000186862	PDZD7	9
ENSG00000187105	HEATR4	9
ENSG00000187187	ZNF546	9
ENSG00000188037	CLCN1	9
ENSG00000188321	ZNF559	9
ENSG00000189195	BTBD8	9
ENSG00000197808	ZNF461	9
ENSG00000198039	ZNF273	9
ENSG00000198633	ZNF534	9
ENSG00000200127		9
ENSG00000200869	RNU6-457P	9
ENSG00000204314	PRRT1	9
ENSG00000205559	CHKB-AS1	9
ENSG00000205959	RP11-689P11.2	9
ENSG00000207650	MIR570	9
ENSG00000213221	DNLZ	9
ENSG00000213640	EEF1DP4	9
ENSG00000214019	RP6-218J18.2	9
ENSG00000214900	LINC01588	9
ENSG00000215375	MYL5	9
ENSG00000215472	RPL17-C18orf32	9
ENSG00000216937	CCDC7	9
ENSG00000218227	RP11-889L3.1	9
ENSG00000219665	CTD-2006C1.2	9
ENSG00000223820	CFL1P1	9
ENSG00000223959	AFG3L1P	9
ENSG00000224138	AC000123.4	9
ENSG00000224204	PHEX-AS1	9
ENSG00000224356	RP11-151A6.4	9
ENSG00000226849	RP4-635E18.7	9
ENSG00000228084	RP5-884G6.2	9
ENSG00000228109	MFI2-AS1	9
ENSG00000228486	LINC01125	9
ENSG00000229583		9
ENSG00000230578	RP13-228J13.5	9
ENSG00000231120	BTF3P10	9
ENSG00000231925	TAPBP	9
ENSG00000232022	FAAHP1	9
ENSG00000233230	AC079807.2	9
ENSG00000233540	DNM3-IT1	9
ENSG00000233690	EBAG9P1	9
ENSG00000234465	PINLYP	9
ENSG00000236144	TMEM147-AS1	9
ENSG00000237438	CECR7	9
ENSG00000240288	GHRLOS	9
ENSG00000240720	LRRD1	9
ENSG00000240996	RP11-80H5.7	9
ENSG00000241015	TPM3P9	9
ENSG00000241058	NSUN6	9
ENSG00000241170	RP11-147I3.1	9
ENSG00000242349	NPPA-AS1	9
ENSG00000243978	RGAG1	9
ENSG00000245105	A2M-AS1	9
ENSG00000246089	RP11-115C21.2	9
ENSG00000246877	DNM1P35	9
ENSG00000247950	SEC24B-AS1	9
ENSG00000249471	ZNF324B	9
ENSG00000250443		9
ENSG00000250933	GAPDHP66	9
ENSG00000251050	RP11-168A11.4	9
ENSG00000251666	ZNF346-IT1	9
ENSG00000253767	PCDHGA8	9
ENSG00000254682	RP11-660L16.2	9
ENSG00000254995	STX16-NPEPL1	9
ENSG00000255000	AC139103.1	9
ENSG00000255035	SDHCP4	9
ENSG00000255040	RP11-677N16.1	9
ENSG00000255408	PCDHA3	9
ENSG00000256742	RP13-941N14.1	9
ENSG00000258378	RP11-517O13.1	9
ENSG00000259332	ST20-MTHFS	9
ENSG00000259446	RP11-489D6.2	9
ENSG00000259488	RP11-154J22.1	9
ENSG00000259736	CRTC3-AS1	9
ENSG00000259943	RP1-39G22.7	9
ENSG00000260193	RP11-83N9.5	9
ENSG00000260552	RP11-49I11.1	9
ENSG00000260988	RP11-285A1.1	9
ENSG00000260992	DOCK9-AS2	9
ENSG00000261043	RP11-24M17.6	9
ENSG00000261170	RP11-252A24.5	9
ENSG00000261280		9
ENSG00000261305	RP4-584D14.7	9
ENSG00000261324	RP11-174G6.5	9
ENSG00000261434	CTD-2083E4.7	9
ENSG00000263033	RP11-396B14.2	9
ENSG00000263968	RN7SL381P	9
ENSG00000266490	CTD-2349P21.9	9
ENSG00000267077	RP11-127I20.5	9
ENSG00000267161		9
ENSG00000267219	AC010504.2	9
ENSG00000267504	RP11-845C23.2	9
ENSG00000268061	NAPA-AS1	9
ENSG00000269235	ZNF350-AS1	9
ENSG00000269352	PTOV1-AS2	9
ENSG00000269873	CTD-2587H19.3	9
ENSG00000269925	RP3-467L1.6	9
ENSG00000270008	RP11-298P3.4	9
ENSG00000270015	RP11-540B6.6	9
ENSG00000270067	CTC-487M23.5	9
ENSG00000272070	AC005618.6	9
ENSG00000272377		9
ENSG00000272609	RP11-461M2.2	9
ENSG00000272797	RP11-368I23.3	9
ENSG00000272894	RP5-1159O4.1	9
ENSG00000273492	AP000230.1	9
ENSG00000003402	CFLAR	9
ENSG00000006837	CDKL3	9
ENSG00000016391	CHDH	9
ENSG00000031081	ARHGAP31	9
ENSG00000056736	IL17RB	9
ENSG00000062822	POLD1	9
ENSG00000065057	NTHL1	9
ENSG00000066405	CLDN18	9
ENSG00000084628	NKAIN1	9
ENSG00000100197	CYP2D6	9
ENSG00000100249	C22orf31	9
[truncated: 7,728 more rows]
