# Supplementary material for: Human-specific features of spatial gene expression and regulation in eight brain regions
Source: HighWire-hosted journal article supplement (doi:10.1101/gr.231357.117), 2018-06-13
Supplement: Supplemental_Table_S9.xlsx [file Supplemental_Table_S9.xlsx]

## Sheet: Supplemental Table S8
Supplemental Table S9. Cell type enrichment in human-specific modules based on different cell type marker sets
human-specific modules	consensus cell types	mouse proteome of cell culture1 (neuron, astrocyte, microgila, oligodendrocyte)	single-cell of mouse cortex and hippocampus2 (ependymal, oligodendrocyte, microglia, astrocyte, CA1 Pyramidal, S1 Pyramidal, interneuron, endothelial, mural)	single-cell of human anterior temporal lobe3 (oligodendrocyte precursor cell, oligodendrocytes, astrocyte, microglia, neuron, endothelial)	human temporal lobe cortex4 (neuron, astrocyte, microglia, oligodendrocyte, endothelial)
module 6	microglia, endothelial	microglia	endothelial	microglia, endothelial	microglia, endothelial
module 12	microglia	microglia	microglia	microglia	microglia, neuron
module 20	microglia, endothelial	microglia, astrocyte	endothelial, mural	microglia, endothelial	microglia, endothelial
module 22	neuron, astrocyte	neuron, astrocyte	ependymal, CA1 Pyramidal	\	astrocyte, neuron
7 genes in IHC experiment	IHC results
RSPH1	neuron	astrocyte	ependymal	\	neuron
PDLIM4	neuron	astrocyte	\	\	\
FOLR1	neuron	astrocyte	\	\	\
CNN3	astrocyte	astrocyte	ependymal	astrocyte	astrocyte
F3	astrocyte	astrocyte	\	astrocyte	astrocyte
PBXIP1	astrocyte	astrocyte	\	astrocyte	astrocyte
RGMA	neuron	neuron	astrocyte	\	astrocyte
1. Sharma, K. et al. Cell type- and brain region-resolved mouse brain proteome. Nat Neurosci 18, 1819-1831, doi:10.1038/nn.4160 (2015).
2. Zeisel, A. et al. Brain structure. Cell types in the mouse cortex and hippocampus revealed by single-cell RNA-seq. Science 347, 1138-1142, doi:10.1126/science.aaa1934 (2015).
3. Darmanis, S. et al. A survey of human brain transcriptome diversity at the single cell level. Proc Natl Acad Sci U S A 112, 7285-7290, doi:10.1073/pnas.1507125112 (2015).
4. Zhang Y, et al. Purification and Characterization of Progenitor and Mature Human Astrocytes Reveals Transcriptional and Functional Differences with Mouse. Neuron 89: 37-53.
