# Supplementary material for: Human-specific features of spatial gene expression and regulation in eight brain regions
Source: HighWire-hosted journal article supplement (doi:10.1101/gr.231357.117), 2018-06-13
Supplement: Supplemental_Table_S10.xlsx [file Supplemental_Table_S10.xlsx]

## Sheet: Supplemental Table S9
Supplemental Table S10. The enrichment of genes in co-expression modules in three GO term categories and cell type markers
Module	Category	Term	Annotated	Significant	p.adj
6	BP	translational initiation	86	18	0.000242165
6	BP	SRP-dependent cotranslational protein targeting to membrane	59	14	0.000479967
6	BP	nuclear-transcribed mRNA catabolic process, nonsense-mediated decay	62	14	0.000687225
6	BP	positive regulation of endothelial cell differentiation	7	5	0.00178024
6	BP	translational termination	71	14	0.00189078
6	BP	negative regulation of innate immune response	12	6	0.00189078
6	BP	viral transcription	75	14	0.00283617
6	BP	translational elongation	76	14	0.00283617
6	BP	male genitalia development	12	5	0.019635
6	BP	immune response	628	61	0.0200713
6	BP	cell activation	401	39	0.0433606
6	BP	regulation of inflammatory response	101	14	0.0462
6	MF	structural constituent of ribosome	63	15	0.000242165
6	MF	rRNA binding	17	7	0.00189078
6	MF	poly(A) RNA binding	286	31	0.00432977
6	CC	cytosolic small ribosomal subunit	24	8	0.00189078
6	CC	extracellular space	526	48	0.00283617
6	cell type	Microglia	165	19	0.000177011
12	BP	positive regulation of cytokine biosynthetic process	20	6	0.004209
12	BP	positive regulation of interleukin-6 production	29	6	0.02196
12	cell type	Microglia	165	13	0.000143844
20	BP	adaptive immune response	131	20	0.04356
20	CC	proteinaceous extracellular matrix	195	21	0.010098
20	CC	extracellular exosome	1052	61	0.04356
20	cell type	Astrocytes	90	7	0.0418429
20	cell type	Microglia	165	14	0.00228632
22	BP	outer dynein arm assembly	9	8	0.0003201
22	BP	cilium movement	26	13	0.00071489
22	CC	axoneme	42	20	0.029876
22	CC	motile cilium	41	14	0.040546
22	cell type	Neurons	286	43	0.00544738
22	cell type	Astrocytes	90	20	0.00138956
7	MF	DNA binding	629	30	0.046557
2	cell type	Neurons	286	21	1.56865e-05
3	MF	metal ion binding	1394	36	0.04334
5	MF	DNA binding	629	18	0.0407
8	BP	SRP-dependent cotranslational protein targeting to membrane	59	9	0.0018034
8	BP	nuclear-transcribed mRNA catabolic process, nonsense-mediated decay	62	9	0.0018034
8	BP	translational initiation	86	10	0.003048
8	BP	translational termination	71	9	0.0033528
8	BP	viral transcription	75	9	0.004318
8	BP	translational elongation	76	10	0.0104775
8	MF	structural constituent of ribosome	63	9	0.0018034
8	CC	cytosolic large ribosomal subunit	33	6	0.00762
15	cell type	Neurons	286	53	1.75896e-07
19	cell type	Oligodendrocytes	44	14	0.00232641
19	cell type	Microglia	165	31	0.0222643
21	BP	complement activation, classical pathway	12	6	0.043944
21	BP	Arp2/3 complex-mediated actin nucleation	8	5	0.043944
21	BP	cytoplasmic transport	370	47	0.043944
21	CC	dendrite	200	34	0.003662
21	CC	extracellular exosome	1052	106	0.043944
21	cell type	Neurons	286	31	0.00139237
24	cell type	Astrocytes	90	12	0.000482492
24	cell type	Oligodendrocytes	44	7	0.00221319
16 + 22	BP	outer dynein arm assembly	9	8	0.00102125
16 + 22	BP	cilium movement	26	15	0.00653125
16 + 22	BP	axoneme assembly	29	18	0.0255312
16 + 22	CC	axoneme	42	21	0.0205833
16 + 22	CC	motile cilium	41	15	0.038475
16 + 22	cell type	Neurons	286	47	0.0154169
16 + 22	cell type	Astrocytes	90	22	0.0018165
BP: biological processes.
MF: molecular functions.
CC: cellular components.
Annotated: number of term-associated genes within 9,726 genes differentially expressed between humans and chimpanzees in at least one brain region.
Significant: number of term-associated genes within a certain co-expression module.
p.adj: fisher's exact test (for GO terms) or hypergeometric test (for cell type markers) p-values after BH correction.
