# Supplementary material for: Human-specific features of spatial gene expression and regulation in eight brain regions
Source: HighWire-hosted journal article supplement (doi:10.1101/gr.231357.117), 2018-06-13
Supplement: Supplemental_Table_S11.xlsx [file Supplemental_Table_S11.xlsx]

## Sheet: 工作表1
Supplemental Table S11. Proportion of variance explained by each regulatory mechanism in each module for genes with all three regulatory mechanisms
Module label	Ensembl ID	Gene symbol	Promoter CREs	Enhancer CREs	TF with binding sites located in promoter regions	Predominant mechanism
1	ENSG00000025039	RRAGD	0.326633	0.351998	0.290402	enhancer
1	ENSG00000079257	LXN	0.462785	0.262652	0.167043	promoter
1	ENSG00000126259	KIRREL2	0.299694	0.240683	0.141326	promoter
1	ENSG00000143036	SLC44A3	0.115189	0.539117	0.259397	enhancer
1	ENSG00000160613	PCSK7	0.375145	0.129629	0.177344	promoter
1	ENSG00000162849	KIF26B	0.360493	0.371468	0.249489	enhancer
1	ENSG00000188529	SRSF10	0.632641	0.16105	0.18929	promoter
1	ENSG00000067829	IDH3G	0.328472	0.434057	0.228295	enhancer
1	ENSG00000124302	CHST8	0.463247	0.455829	0.0733633	promoter
1	ENSG00000154319	FAM167A	0.219951	0.330409	0.122249	enhancer
1	ENSG00000205086	C2orf91	0.364521	0.485866	0.0874099	enhancer
1	ENSG00000227741	RP11-536C5.7	0.373353	0.322962	0.244498	promoter
1	ENSG00000230725	RP4-738P15.1	0.0951333	0.129167	0.347624	TF
1	ENSG00000261842	RP11-143I21.1	0.361351	0.266407	0.303637	promoter
1	ENSG00000146233	CYP39A1	0.917642	0.00590614	0.04456	promoter
1	ENSG00000038295	TLL1	0.356048	0.353332	0.290396	promoter
1	ENSG00000115339	GALNT3	0.0222147	0.654593	0.134384	enhancer
1	ENSG00000143669	LYST	0.32047	0.328925	0.31951	enhancer
1	ENSG00000162434	JAK1	0.294606	0.0285466	0.218237	promoter
1	ENSG00000162437	RAVER2	0.61637	0.0839625	0.198574	promoter
1	ENSG00000166250	CLMP	0.345696	0.33195	0.308726	promoter
1	ENSG00000173166	RAPH1	0.525956	0.0423368	0.382682	promoter
1	ENSG00000186472	PCLO	0.427607	0.435282	0.132663	enhancer
1	ENSG00000254192	CTC-558O2.2	0.398428	0.346484	0.21758	promoter
1	ENSG00000177200	CHD9	0.464957	0.241223	0.200469	promoter
2	ENSG00000107282	APBA1	0.157732	0.135154	0.521269	TF
2	ENSG00000112149	CD83	0.283847	0.417045	0.165819	enhancer
2	ENSG00000165637	VDAC2	0.0632869	0.131435	0.326508	TF
2	ENSG00000105245	NUMBL	0.153382	0.175132	0.235371	TF
2	ENSG00000107242	PIP5K1B	0.504783	0.344484	0.103485	promoter
2	ENSG00000120137	PANK3	0.294326	0.394133	0.214939	enhancer
2	ENSG00000138095	LRPPRC	0.267873	0.0588592	0.365719	TF
2	ENSG00000139445	FOXN4	0.100818	0.770727	0.0925577	enhancer
2	ENSG00000140284	SLC27A2	0.424854	0.174624	0.0669451	promoter
2	ENSG00000157168	NRG1	0.407995	0.152723	0.083887	promoter
2	ENSG00000162636	FAM102B	0.248596	0.168145	0.152109	promoter
2	ENSG00000172568	FNDC9	0.1947	0.201992	0.387416	TF
2	ENSG00000247775	SNCA-AS1	0.130186	0.342171	0.451336	TF
2	ENSG00000254842	RP11-890B15.2	0.0757304	0.229577	0.145712	enhancer
2	ENSG00000144868	TMEM108	0.385556	0.438935	0.152429	enhancer
2	ENSG00000254087	LYN	0.270499	0.288763	0.186322	enhancer
2	ENSG00000100592	DAAM1	0.106914	0.312075	0.350916	TF
2	ENSG00000107295	SH3GL2	0.26878	0.528318	0.183807	enhancer
2	ENSG00000121671	CRY2	0.372497	0.318842	0.195223	promoter
2	ENSG00000145882	PCYOX1L	0.314092	0.372294	0.303126	enhancer
2	ENSG00000146374	RSPO3	0.676088	0.0543759	0.236959	promoter
2	ENSG00000147724	FAM135B	0.0878637	0.249397	0.216845	enhancer
2	ENSG00000148606	POLR3A	0.140136	0.238956	0.406647	TF
2	ENSG00000158470	B4GALT5	0.069853	0.0924297	0.0396466	enhancer
2	ENSG00000172795	DCP2	0.372237	0.222257	0.320506	promoter
2	ENSG00000104219	ZDHHC2	0.532416	0.102574	0.287461	promoter
2	ENSG00000084764	MAPRE3	0.0341177	0.0333147	0.0968039	TF
3	ENSG00000134716	CYP2J2	0.263619	0.157571	0.55229	TF
3	ENSG00000196152	ZNF79	0.335109	0.448019	0.160697	enhancer
3	ENSG00000246339	EXTL3-AS1	0.105907	0.0823566	0.17826	TF
3	ENSG00000261534	RP11-244O19.1	0.104309	0.0953984	0.489043	TF
3	ENSG00000068976	PYGM	0.228505	0.17683	0.212151	promoter
3	ENSG00000072195	SPEG	0.306481	0.333196	0.0557098	enhancer
3	ENSG00000116981	NT5C1A	0.18915	0.180539	0.233515	TF
3	ENSG00000141449	GREB1L	0.196511	0.282056	0.34351	TF
3	ENSG00000146648	EGFR	0.130079	0.352879	0.0458201	enhancer
3	ENSG00000153933	DGKE	0.20457	0.110974	0.225091	TF
3	ENSG00000177398	UMODL1	0.201505	0.593922	0.109591	enhancer
3	ENSG00000179361	ARID3B	0.423141	0.239994	0.319686	promoter
3	ENSG00000189134	NKAPL	0.0509435	0.194814	0.283565	TF
3	ENSG00000223882	ABCC5-AS1	0.25499	0.568549	0.0943066	enhancer
3	ENSG00000235121	RP11-90L20.2	0.0427275	0.0425556	0.0846852	TF
3	ENSG00000250343	CTC-255N20.1	0.153442	0.226404	0.545922	TF
3	ENSG00000256399	RP11-274J7.3	0.110914	0.339509	0.197222	enhancer
3	ENSG00000261056	RP11-454F8.2	0.406172	0.166537	0.067233	promoter
3	ENSG00000266993	RP4-657D16.3	0.272723	0.254552	0.320338	TF
3	ENSG00000197816	CCDC180	0.0904798	0.312876	0.475005	TF
3	ENSG00000258561	RP11-72M17.1	0.0730637	0.376429	0.170821	enhancer
3	ENSG00000137872	SEMA6D	0.587414	0.223629	0.130245	promoter
3	ENSG00000151693	ASAP2	0.368418	0.145009	0.0743969	promoter
3	ENSG00000260198	RP11-441F2.2	0.259985	0.434326	0.0900032	enhancer
3	ENSG00000261320	RP11-297D21.2	0.289637	0.275528	0.0519234	promoter
3	ENSG00000135315	CEP162	0.195334	0.0857927	0.552666	TF
3	ENSG00000221944	TIGD1	0.117852	0.081261	0.123611	TF
4	ENSG00000080608	PUM3	0.0150346	0.0713713	0.012023	enhancer
4	ENSG00000227455	RP11-300M24.1	0.302299	0.0470082	0.0596276	promoter
4	ENSG00000248429	RP11-597D13.9	0.0848701	0.172197	0.146848	enhancer
4	ENSG00000261520	DLGAP1-AS5	0.0841686	0.288522	0.0989887	enhancer
4	ENSG00000270139	AP001172.3	0.129805	0.106056	0.507777	TF
4	ENSG00000231691	RP11-203F10.5	0.0912317	0.147509	0.0310109	enhancer
5	ENSG00000127124	HIVEP3	0.251934	0.726961	0.0170017	enhancer
5	ENSG00000234492	RPL34-AS1	0.0455039	0.0182365	0.110311	TF
5	ENSG00000269883	RP11-463C8.7	0.408266	0.286423	0.232855	promoter
5	ENSG00000118922	KLF12	0.490201	0.214789	0.205901	promoter
5	ENSG00000180537	RNF182	0.245816	0.226076	0.298217	TF
5	ENSG00000256001	RP11-575F12.2	0.318912	0.137608	0.130353	promoter
5	ENSG00000256717	AP000797.3	0.0914227	0.0880953	0.0315005	promoter
5	ENSG00000187715	KBTBD12	0.0353728	0.0285208	0.107609	TF
5	ENSG00000181773	GPR3	0.337198	0.518278	0.129301	enhancer
5	ENSG00000228153	RP11-23I7.1	0.0622067	0.316752	0.511954	TF
5	ENSG00000182606	TRAK1	0.19825	0.196495	0.236814	TF
5	ENSG00000223754	AC008073.9	0.127997	0.0149406	0.0174415	promoter
5	ENSG00000225302	RP11-539I5.1	0.360128	0.0494895	0.306052	promoter
5	ENSG00000250041	CTD-2003C8.2	0.10811	0.00507105	0.02444	promoter
6	ENSG00000100599	RIN3	0.570932	0.156308	0.0598971	promoter
6	ENSG00000102755	FLT1	0.266075	0.309458	0.200812	enhancer
6	ENSG00000127084	FGD3	0.000535787	0.340332	0.070267	enhancer
6	ENSG00000136936	XPA	0.120526	0.124139	0.0727969	enhancer
6	ENSG00000137752	CASP1	0.348827	0.213523	0.0438382	promoter
6	ENSG00000158270	COLEC12	0.0693796	0.0197793	0.0433628	promoter
6	ENSG00000163565	IFI16	0.447278	0.148665	0.215521	promoter
6	ENSG00000163909	HEYL	0.415023	0.0613702	0.229837	promoter
6	ENSG00000164308	ERAP2	0.0303796	0.0475455	0.0400589	enhancer
6	ENSG00000168404	MLKL	0.224356	0.14994	0.104751	promoter
6	ENSG00000170759	KIF5B	0.558703	0.0499585	0.205006	promoter
6	ENSG00000198034	RPS4X	0.299048	0.473588	0.143389	enhancer
6	ENSG00000204540	PSORS1C1	0.0123449	0.300467	0.0268246	enhancer
6	ENSG00000018625	ATP1A2	0.133463	0.158543	0.115408	enhancer
6	ENSG00000072163	LIMS2	0.11946	0.186457	0.163393	enhancer
6	ENSG00000087589	CASS4	0.142485	0.0698851	0.379681	TF
6	ENSG00000105894	PTN	0.0872578	0.0352908	0.23534	TF
6	ENSG00000111832	RWDD1	0.160827	0.36183	0.249416	enhancer
6	ENSG00000112414	ADGRG6	0.159646	0.0633158	0.0661586	promoter
6	ENSG00000121966	CXCR4	0.0217984	0.0578345	0.0704912	TF
6	ENSG00000128052	KDR	0.0727931	0.0526386	0.0459795	promoter
6	ENSG00000130158	DOCK6	0.230559	0.195609	0.0559078	promoter
6	ENSG00000132622	HSPA12B	0.206201	0.141275	0.176054	promoter
6	ENSG00000144891	AGTR1	0.338059	0.207546	0.0372653	promoter
6	ENSG00000148935	GAS2	0.309503	0.216887	0.100992	promoter
6	ENSG00000164318	EGFLAM	0.144006	0.398114	0.068252	enhancer
6	ENSG00000167280	ENGASE	0.136597	0.305435	0.188033	enhancer
6	ENSG00000168062	BATF2	0.307225	0.419521	0.221244	enhancer
6	ENSG00000180447	GAS1	0.227184	0.0218673	0.187183	promoter
6	ENSG00000184371	CSF1	0.214289	0.225102	0.397145	TF
6	ENSG00000188338	SLC38A3	0.130936	0.147697	0.00516012	enhancer
6	ENSG00000146477	SLC22A3	0.090252	0.38471	0.475525	TF
6	ENSG00000259275	RP11-522B15.3	0.211195	0.355677	0.21898	enhancer
6	ENSG00000112837	TBX18	0.0684887	0.0628743	0.157763	TF
7	ENSG00000012211	PRICKLE3	0.00257994	0.00173374	0.00988029	TF
7	ENSG00000115827	DCAF17	0.0155843	0.0139872	0.719231	TF
7	ENSG00000135547	HEY2	0.435949	0.332478	0.12445	promoter
7	ENSG00000146592	CREB5	0.102417	0.564384	0.0557116	enhancer
7	ENSG00000148158	SNX30	0.171643	0.419656	0.156742	enhancer
7	ENSG00000228716	DHFR	0.280095	0.0511862	0.564066	TF
7	ENSG00000253051	SNORA31	0.0408698	0.111314	0.256215	TF
7	ENSG00000255031	RP11-802E16.3	0.0934439	0.119057	0.570302	TF
7	ENSG00000271780	RP11-1017G21.5	0.183443	0.062791	0.40739	TF
7	ENSG00000149257	SERPINH1	0.205573	0.291182	0.0137376	enhancer
7	ENSG00000185736	ADARB2	0.0550593	0.147453	0.159783	TF
7	ENSG00000256469	RP11-856F16.2	0.00120526	0.0148641	0.0321331	TF
7	ENSG00000092421	SEMA6A	0.0550884	0.404407	0.111969	enhancer
7	ENSG00000164323	CFAP97	0.171773	0.152112	0.649267	TF
7	ENSG00000166323	C11orf65	0.0441436	0.286428	0.657933	TF
7	ENSG00000236700	LINC01010	0.280877	0.351054	0.114822	enhancer
7	ENSG00000124224	PPP4R1L	0.190354	0.228206	0.308242	TF
7	ENSG00000213463	SYNJ2BP	0.0880253	0.148488	0.168232	TF
7	ENSG00000259498	RP11-244F12.3	0.133963	0.0931173	0.0497341	promoter
7	ENSG00000266714	MYO15B	0.353469	0.111779	0.174751	promoter
8	ENSG00000074621	SLC24A1	0.25485	0.0533861	0.162569	promoter
8	ENSG00000132970	WASF3	0.273209	0.327164	0.249503	enhancer
8	ENSG00000178093	TSSK6	0.095607	0.0455719	0.0858895	promoter
8	ENSG00000236953	ZDHHC20-IT1	0.119098	0.148761	0.529235	TF
8	ENSG00000121152	NCAPH	0.174421	0.0261111	0.0313605	promoter
8	ENSG00000128917	DLL4	0.345798	0.0241736	0.537404	TF
8	ENSG00000160796	NBEAL2	0.110028	0.0966799	0.23765	TF
8	ENSG00000166979	EVA1C	0.16831	0.22472	0.161667	enhancer
8	ENSG00000168010	ATG16L2	0.0671025	0.029882	0.343528	TF
8	ENSG00000168476	REEP4	0.191908	0.430732	0.245397	enhancer
8	ENSG00000225377	NRSN2-AS1	0.164971	0.159164	0.120796	promoter
8	ENSG00000255462	RP11-483L5.1	0.174924	0.126056	0.648664	TF
8	ENSG00000088451	TGDS	0.200203	0.282483	0.272595	enhancer
8	ENSG00000166483	WEE1	0.433	0.105932	0.0144856	promoter
8	ENSG00000259182	RP11-424I19.2	0.153967	0.115728	0.0447124	promoter
8	ENSG00000006025	OSBPL7	0.189471	0.403866	0.189647	enhancer
8	ENSG00000128272	ATF4	0.33651	0.398722	0.0676152	enhancer
9	ENSG00000007237	GAS7	0.336156	0.284692	0.249369	promoter
9	ENSG00000074657	ZNF532	0.230537	0.372203	0.185323	enhancer
9	ENSG00000127863	TNFRSF19	0.0607584	0.508774	0.353251	enhancer
9	ENSG00000135824	RGS8	0.216591	0.148574	0.614387	TF
9	ENSG00000171777	RASGRP4	0.0716614	0.261928	0.337571	TF
9	ENSG00000241058	NSUN6	0.293817	0.225617	0.168021	promoter
9	ENSG00000256742	RP13-941N14.1	0.311389	0.307112	0.262228	promoter
9	ENSG00000031081	ARHGAP31	0.330363	0.338282	0.211175	enhancer
9	ENSG00000084628	NKAIN1	0.389465	0.400316	0.157189	enhancer
9	ENSG00000110344	UBE4A	0.354623	0.320533	0.200419	promoter
9	ENSG00000119139	TJP2	0.0837243	0.0666316	0.322462	TF
9	ENSG00000136830	FAM129B	0.113417	0.120738	0.577486	TF
9	ENSG00000141994	DUS3L	0.598064	0.140096	0.0839154	promoter
9	ENSG00000142208	AKT1	0.329695	0.295693	0.139897	promoter
9	ENSG00000152377	SPOCK1	0.389833	0.434896	0.0467654	enhancer
9	ENSG00000160271	RALGDS	0.27122	0.350845	0.347842	enhancer
9	ENSG00000162909	CAPN2	0.427304	0.277068	0.021257	promoter
9	ENSG00000172461	FUT9	0.561141	0.120074	0.228811	promoter
9	ENSG00000197165	SULT1A2	0.253672	0.445315	0.158644	enhancer
9	ENSG00000197442	MAP3K5	0.0365754	0.0287196	0.179923	TF
9	ENSG00000226763	SRRM5	0.433728	0.25936	0.192049	promoter
9	ENSG00000234545	FAM133B	0.472621	0.0410601	0.381345	promoter
9	ENSG00000236591	RP11-162J8.3	0.196397	0.205404	0.166418	enhancer
9	ENSG00000259372	CTD-2240J17.1	0.155242	0.0934192	0.677466	TF
9	ENSG00000269416	LINC01224	0.344214	0.271461	0.131536	promoter
9	ENSG00000270742	RP4-802A10.1	0.320431	0.303995	0.333068	TF
9	ENSG00000273217	CTC-432M15.3	0.311459	0.248948	0.251889	promoter
9	ENSG00000124216	SNAI1	0.188634	0.147107	0.301067	TF
9	ENSG00000138336	TET1	0.149977	0.0750977	0.663381	TF
9	ENSG00000177699	RP11-16K12.1	0.340338	0.304773	0.290417	promoter
9	ENSG00000007402	CACNA2D2	0.401274	0.319746	0.192223	promoter
9	ENSG00000111262	KCNA1	0.321839	0.309936	0.339059	TF
9	ENSG00000139890	REM2	0.0876449	0.646478	0.0801936	enhancer
9	ENSG00000157578	LCA5L	0.534983	0.239245	0.110862	promoter
9	ENSG00000162804	SNED1	0.356622	0.371855	0.211493	enhancer
9	ENSG00000186235	AC016757.3	0.267078	0.266053	0.32087	TF
9	ENSG00000220378	KRT8P42	0.402882	0.572523	0.014672	enhancer
9	ENSG00000244560	RP4-800G7.2	0.191915	0.136571	0.469213	TF
9	ENSG00000245213	RP11-10K16.1	0.302368	0.317439	0.279475	enhancer
9	ENSG00000247092	SNHG10	0.425463	0.208689	0.249712	promoter
9	ENSG00000264534	AC022384.1	0.401398	0.417301	0.140771	enhancer
9	ENSG00000170322	NFRKB	0.41729	0.0525295	0.491047	TF
9	ENSG00000261485	PAN3-AS1	0.25866	0.221769	0.141994	promoter
9	ENSG00000162738	VANGL2	0.323591	0.283148	0.347106	TF
9	ENSG00000183150	GPR19	0.225649	0.200991	0.340252	TF
9	ENSG00000189149	CRYM-AS1	0.241591	0.166751	0.313453	TF
9	ENSG00000213782	DDX47	0.190849	0.424533	0.281326	enhancer
9	ENSG00000248668	OXCT1-AS1	0.342158	0.245127	0.369127	TF
9	ENSG00000263235	RP11-461A8.4	0.419976	0.411486	0.0735562	promoter
9	ENSG00000270531	RP11-169K17.2	0.385573	0.292027	0.14655	promoter
9	ENSG00000068383	INPP5A	0.148478	0.458703	0.271645	enhancer
9	ENSG00000225792	AC004540.4	0.486093	0.223647	0.218039	promoter
10	ENSG00000149418	ST14	0.283241	0.44522	0.189507	enhancer
10	ENSG00000236501	AC079305.11	0.12972	0.0745846	0.382824	TF
10	ENSG00000113638	TTC33	0.257511	0.0230951	0.116593	promoter
10	ENSG00000164100	NDST3	0.07229	0.193417	0.167985	enhancer
10	ENSG00000170820	FSHR	0.309851	0.105474	0.097672	promoter
10	ENSG00000248980	RP11-87F15.2	0.28219	0.258726	0.205409	promoter
10	ENSG00000172292	CERS6	0.495934	0.259081	0.1836	promoter
10	ENSG00000250329	KDELC1P1	0.0809092	0.318725	0.0626409	enhancer
10	ENSG00000142661	MYOM3	0.194409	0.200197	0.215253	TF
11	ENSG00000058085	LAMC2	0.3726	0.35579	0.262813	promoter
11	ENSG00000105662	CRTC1	0.31907	0.384305	0.276302	enhancer
11	ENSG00000107147	KCNT1	0.341946	0.2457	0.221879	promoter
11	ENSG00000127325	BEST3	0.444548	0.456194	0.0877668	enhancer
11	ENSG00000130309	COLGALT1	0.392191	0.14313	0.338068	promoter
11	ENSG00000133624	ZNF767P	0.354184	0.323104	0.291977	promoter
11	ENSG00000142856	ITGB3BP	0.238584	0.221343	0.199746	promoter
11	ENSG00000148399	DPH7	0.39424	0.132252	0.336048	promoter
11	ENSG00000149591	TAGLN	0.0385692	0.132038	0.154778	TF
11	ENSG00000161638	ITGA5	0.173114	0.094292	0.247552	TF
11	ENSG00000163017	ACTG2	0.113997	0.155532	0.266698	TF
11	ENSG00000167100	SAMD14	0.359305	0.367331	0.262228	enhancer
11	ENSG00000168393	DTYMK	0.428267	0.382576	0.134075	promoter
11	ENSG00000169718	DUS1L	0.334112	0.287226	0.32366	promoter
11	ENSG00000171889	MIR31HG	0.910573	0.00720212	0.0467762	promoter
11	ENSG00000183891	TTC32	0.481789	0.0605275	0.433173	promoter
11	ENSG00000187498	COL4A1	0.0689712	0.0345292	0.0632299	promoter
11	ENSG00000223705	NSUN5P1	0.255617	0.430502	0.256749	enhancer
11	ENSG00000228484	RP11-106M7.1	0.418318	0.414211	0.12985	promoter
11	ENSG00000246100	LINC00900	0.325992	0.337166	0.226476	enhancer
11	ENSG00000256422	RP11-886D15.1	0.234317	0.547295	0.0820851	enhancer
11	ENSG00000259448	RP11-16E12.1	0.111182	0.0371596	0.802878	TF
11	ENSG00000272505	RP11-981G7.6	0.3017	0.651972	0.045348	enhancer
11	ENSG00000001497	LAS1L	0.694755	0.181199	0.0408525	promoter
11	ENSG00000050767	COL23A1	0.295334	0.347322	0.290174	enhancer
11	ENSG00000058056	USP13	0.262616	0.323618	0.278606	enhancer
11	ENSG00000088179	PTPN4	0.326647	0.493844	0.164367	enhancer
11	ENSG00000089820	ARHGAP4	0.324517	0.367448	0.179858	enhancer
11	ENSG00000103175	WFDC1	0.27449	0.120904	0.429151	TF
11	ENSG00000103196	CRISPLD2	0.526537	0.192369	0.128398	promoter
11	ENSG00000104415	WISP1	0.105763	0.0927456	0.203771	TF
11	ENSG00000109758	HGFAC	0.476144	0.231602	0.267335	promoter
11	ENSG00000110723	EXPH5	0.375519	0.370624	0.253164	promoter
11	ENSG00000110900	TSPAN11	0.618354	0.0228893	0.355203	promoter
11	ENSG00000111962	UST	0.397576	0.365846	0.189187	promoter
11	ENSG00000118689	FOXO3	0.33021	0.249731	0.200333	promoter
11	ENSG00000119457	SLC46A2	0.426031	0.429035	0.1275	enhancer
11	ENSG00000120832	MTERF2	0.336533	0.325166	0.281993	promoter
11	ENSG00000122085	MTERF4	0.742967	0.177872	0.0763956	promoter
11	ENSG00000124103	FAM209A	0.336058	0.148981	0.231352	promoter
11	ENSG00000125787	GNRH2	0.469985	0.0629496	0.457443	promoter
11	ENSG00000128159	TUBGCP6	0.430034	0.458739	0.0892289	enhancer
11	ENSG00000133067	LGR6	0.112169	0.0371203	0.814283	TF
11	ENSG00000134115	CNTN6	0.482137	0.458391	0.0247306	promoter
11	ENSG00000135903	PAX3	0.360856	0.366716	0.271827	enhancer
11	ENSG00000139269	INHBE	0.16105	0.468362	0.363709	enhancer
11	ENSG00000141013	GAS8	0.231382	0.329513	0.224511	enhancer
11	ENSG00000141052	MYOCD	0.0892981	0.117986	0.0082461	enhancer
11	ENSG00000144681	STAC	0.379835	0.37947	0.23298	promoter
11	ENSG00000151789	ZNF385D	0.382419	0.369827	0.131095	promoter
11	ENSG00000152214	RIT2	0.43655	0.348712	0.154938	promoter
11	ENSG00000153443	UBALD1	0.370936	0.378532	0.232354	enhancer
11	ENSG00000154553	PDLIM3	0.10017	0.053181	0.842228	TF
11	ENSG00000154736	ADAMTS5	0.337066	0.335498	0.31809	promoter
11	ENSG00000155158	TTC39B	0.302365	0.334942	0.201709	enhancer
11	ENSG00000160199	PKNOX1	0.336718	0.336475	0.290038	promoter
11	ENSG00000160200	CBS	0.326493	0.390483	0.26299	enhancer
11	ENSG00000168397	ATG4B	0.348066	0.337228	0.181563	promoter
11	ENSG00000168843	FSTL5	0.40733	0.399806	0.192345	promoter
11	ENSG00000178821	TMEM52	0.394233	0.40269	0.196467	enhancer
11	ENSG00000181908	AP003774.4	0.37294	0.358984	0.266509	promoter
11	ENSG00000186184	POLR1D	0.387519	0.40991	0.183168	enhancer
11	ENSG00000225808	DNAJC19P5	0.117907	0.091683	0.0760449	promoter
11	ENSG00000227373	RP11-160H22.5	0.239943	0.282364	0.273286	enhancer
11	ENSG00000233896	RP4-684O24.5	0.407638	0.260686	0.197541	promoter
11	ENSG00000234177	LINC01114	0.102117	0.120791	0.00250467	enhancer
11	ENSG00000248643	RBM14-RBM4	0.312102	0.381412	0.274093	enhancer
11	ENSG00000249923	XXbac-B444P24.8	0.406301	0.405862	0.162164	promoter
11	ENSG00000250698	RP11-392B6.1	0.347356	0.359379	0.272847	enhancer
11	ENSG00000250878	METTL21EP	0.379395	0.336299	0.0594418	promoter
11	ENSG00000257613	LINC01481	0.377035	0.359531	0.261744	promoter
11	ENSG00000258172	RP11-1105G2.4	0.0245364	0.156268	0.639721	TF
11	ENSG00000260249	RP11-401P9.5	0.104573	0.136439	0.420569	TF
11	ENSG00000260701	RP11-449J10.1	0.390847	0.37856	0.2303	promoter
11	ENSG00000261978	CTD-2529O21.2	0.359879	0.363126	0.271691	enhancer
11	ENSG00000006071	ABCC8	0.379553	0.343602	0.265571	promoter
11	ENSG00000020577	SAMD4A	0.37911	0.203174	0.349755	promoter
11	ENSG00000106341	PPP1R17	0.125227	0.836267	0.0101931	enhancer
11	ENSG00000145863	GABRA6	0.374483	0.308363	0.313807	promoter
11	ENSG00000197558	SSPO	0.557902	0.0335862	0.345904	promoter
11	ENSG00000225213	RP11-197M22.2	0.291697	0.288642	0.381933	TF
11	ENSG00000233593	RP4-665J23.1	0.417338	0.506739	0.068036	enhancer
11	ENSG00000235954	TTC28-AS1	0.39053	0.116301	0.460248	TF
11	ENSG00000258220	RP11-38F22.1	0.229566	0.214931	0.460341	TF
11	ENSG00000006432	MAP3K9	0.44692	0.410709	0.122795	promoter
11	ENSG00000064703	DDX20	0.346193	0.377076	0.215912	enhancer
11	ENSG00000141837	CACNA1A	0.200659	0.438548	0.35512	enhancer
11	ENSG00000153012	LGI2	0.0482471	0.538163	0.384618	enhancer
11	ENSG00000159733	ZFYVE28	0.468654	0.500032	0.0296212	enhancer
11	ENSG00000164122	ASB5	0.306543	0.32861	0.0205598	enhancer
11	ENSG00000169062	UPF3A	0.459616	0.326918	0.192398	promoter
11	ENSG00000169991	IFFO2	0.437891	0.243974	0.313057	promoter
11	ENSG00000173914	RBM4B	0.417142	0.447666	0.107888	enhancer
11	ENSG00000181744	C3orf58	0.461799	0.292722	0.236553	promoter
11	ENSG00000184838	PRR16	0.312245	0.304486	0.267511	promoter
11	ENSG00000187239	FNBP1	0.331232	0.28974	0.37551	TF
11	ENSG00000197847	SLC22A20	0.363947	0.401948	0.2159	enhancer
11	ENSG00000203307	RP11-375H19.2	0.109806	0.206518	0.683448	TF
11	ENSG00000246859	STARD4-AS1	0.368282	0.503237	0.119691	enhancer
11	ENSG00000146090	RASGEF1C	0.376154	0.370251	0.23342	promoter
11	ENSG00000160588	MPZL3	0.435063	0.345628	0.202629	promoter
11	ENSG00000182183	FAM159A	0.171162	0.217691	0.494348	TF
11	ENSG00000271086	NAMA	0.39773	0.22775	0.0707054	promoter
12	ENSG00000011422	PLAUR	0.212895	0.0574883	0.0994819	promoter
12	ENSG00000043462	LCP2	0.23013	0.133164	0.248593	TF
12	ENSG00000122862	SRGN	0.263554	0.336765	0.0355091	enhancer
12	ENSG00000129158	SERGEF	0.298479	0.36173	0.0728996	enhancer
12	ENSG00000133612	AGAP3	0.317265	0.217773	0.211336	promoter
12	ENSG00000135324	MRAP2	0.210629	0.0803272	0.439252	TF
12	ENSG00000152056	AP1S3	0.33767	0.0949951	0.0565803	promoter
12	ENSG00000160539	PLPP7	0.278637	0.562129	0.0650141	enhancer
12	ENSG00000162783	IER5	0.269784	0.0896576	0.572044	TF
12	ENSG00000213246	SUPT4H1	0.0786569	0.107893	0.38097	TF
12	ENSG00000272971	RP11-284F21.11	0.388492	0.191713	0.089065	promoter
12	ENSG00000013392	RWDD2A	0.271036	0.501705	0.146048	enhancer
12	ENSG00000104112	SCG3	0.176713	0.390219	0.367309	enhancer
12	ENSG00000117533	VAMP4	0.155783	0.129846	0.121319	promoter
12	ENSG00000158806	NPM2	0.433098	0.277624	0.276624	promoter
12	ENSG00000163590	PPM1L	0.271712	0.327078	0.14626	enhancer
12	ENSG00000180611	MB21D2	0.171966	0.212885	0.164538	enhancer
12	ENSG00000182901	RGS7	0.0503987	0.0778382	0.571502	TF
12	ENSG00000229666	MAST4-AS1	0.0847349	0.086296	0.750099	TF
12	ENSG00000186416	NKRF	0.284636	0.14228	0.374195	TF
12	ENSG00000236671	PRKG1-AS1	0.588604	0.147425	0.14766	promoter
12	ENSG00000259234	ANKRD34C-AS1	0.174413	0.359752	0.179005	enhancer
12	ENSG00000145819	ARHGAP26	0.100679	0.0901421	0.755739	TF
12	ENSG00000162852	CNST	0.122197	0.169486	0.675673	TF
12	ENSG00000165995	CACNB2	0.375246	0.412624	0.0904708	enhancer
13	ENSG00000128789	PSMG2	0.194892	0.0153178	0.32995	TF
13	ENSG00000131831	RAI2	0.252732	0.196202	0.415639	TF
13	ENSG00000243725	TTC4	0.0233367	0.0776107	0.186308	TF
13	ENSG00000132294	EFR3A	0.265838	0.383645	0.31913	enhancer
13	ENSG00000135596	MICAL1	0.22198	0.228458	0.244303	TF
13	ENSG00000138821	SLC39A8	0.0999085	0.313566	0.258027	enhancer
13	ENSG00000106588	PSMA2	0.0600494	0.0419296	0.0159202	promoter
13	ENSG00000214595	EML6	0.411809	0.318114	0.236957	promoter
13	ENSG00000256008	RP11-728G15.1	0.306369	0.399655	0.279993	enhancer
13	ENSG00000260910	LINC00565	0.149183	0.519157	0.145058	enhancer
14	ENSG00000225362	CT62	0.435398	0.068837	0.078928	promoter
14	ENSG00000232487	RASA3-IT1	0.255419	0.0971678	0.0790438	promoter
14	ENSG00000258240	RP1-46F2.3	0.698686	0.184675	0.103994	promoter
14	ENSG00000156427	FGF18	0.425954	0.523634	0.0318757	enhancer
14	ENSG00000235597	LINC01102	0.201893	0.307807	0.0946105	enhancer
14	ENSG00000167083	GNGT2	0.102617	0.213783	0.667257	TF
14	ENSG00000246695	RASSF8-AS1	0.342447	0.46447	0.119855	enhancer
15	ENSG00000053524	MCF2L2	0.288876	0.0499066	0.103644	promoter
15	ENSG00000087116	ADAMTS2	0.0547693	0.71733	0.159158	enhancer
15	ENSG00000104361	NIPAL2	0.0496743	0.909037	0.0224915	enhancer
15	ENSG00000110148	CCKBR	0.206773	0.251074	0.442957	TF
15	ENSG00000111799	COL12A1	0.288393	0.313722	0.339423	TF
15	ENSG00000113231	PDE8B	0.264523	0.304228	0.27852	enhancer
15	ENSG00000120333	MRPS14	0.488007	0.0262513	0.379903	promoter
15	ENSG00000135622	SEMA4F	0.158805	0.300416	0.117253	enhancer
15	ENSG00000137501	SYTL2	0.0472918	0.692369	0.165492	enhancer
15	ENSG00000152954	NRSN1	0.39991	0.318731	0.207471	promoter
15	ENSG00000154764	WNT7A	0.230235	0.386613	0.332554	enhancer
15	ENSG00000157617	C2CD2	0.244596	0.22467	0.467634	TF
15	ENSG00000162545	CAMK2N1	0.118726	0.1251	0.628973	TF
15	ENSG00000163013	FBXO41	0.0723655	0.0726214	0.0377875	enhancer
15	ENSG00000165887	ANKRD2	0.226946	0.514812	0.112154	enhancer
15	ENSG00000165966	PDZRN4	0.177264	0.199466	0.371558	TF
15	ENSG00000166407	LMO1	0.0805387	0.0554611	0.506726	TF
15	ENSG00000172020	GAP43	0.118937	0.213818	0.0801788	enhancer
15	ENSG00000172399	MYOZ2	0.0900204	0.159786	0.50514	TF
15	ENSG00000186188	FFAR4	0.601285	0.284034	0.0994788	promoter
15	ENSG00000223891	OSER1-AS1	0.140098	0.0442127	0.296959	TF
15	ENSG00000236054	LL22NC03-104C7.1	0.286977	0.450781	0.0169212	enhancer
15	ENSG00000243902	ELFN2	0.64559	0.190723	0.0281974	promoter
15	ENSG00000253210	RP11-809O17.1	0.27583	0.254851	0.327911	TF
15	ENSG00000253805	RP11-1049H7.2	0.120912	0.0702022	0.491842	TF
15	ENSG00000261616	RP11-6O2.3	0.207004	0.350662	0.266118	enhancer
15	ENSG00000272646	RP11-188P17.2	0.132019	0.126128	0.0538604	promoter
15	ENSG00000061337	LZTS1	0.237799	0.464066	0.0134867	enhancer
15	ENSG00000074603	DPP8	0.0931647	0.391831	0.454623	TF
15	ENSG00000078295	ADCY2	0.238834	0.281435	0.232595	enhancer
15	ENSG00000081923	ATP8B1	0.28184	0.363997	0.263162	enhancer
15	ENSG00000083642	PDS5B	0.0315358	0.454317	0.0496675	enhancer
15	ENSG00000089847	ANKRD24	0.339974	0.436254	0.183958	enhancer
15	ENSG00000095713	CRTAC1	0.26363	0.169183	0.546407	TF
15	ENSG00000117155	SSX2IP	0.119302	0.409841	0.254832	enhancer
15	ENSG00000119866	BCL11A	0.294738	0.319883	0.259483	enhancer
15	ENSG00000123454	DBH	0.450839	0.0356567	0.436483	promoter
15	ENSG00000128656	CHN1	0.133971	0.155855	0.672513	TF
15	ENSG00000131378	RFTN1	0.424022	0.378333	0.17557	promoter
15	ENSG00000137809	ITGA11	0.371321	0.0825139	0.0637387	promoter
15	ENSG00000143067	ZNF697	0.0894777	0.302881	0.500418	TF
15	ENSG00000145147	SLIT2	0.2891	0.0751546	0.418106	TF
15	ENSG00000151952	TMEM132D	0.444319	0.154413	0.113904	promoter
15	ENSG00000162631	NTNG1	0.303968	0.496938	0.0711187	enhancer
15	ENSG00000168734	PKIG	0.571622	0.115407	0.169923	promoter
15	ENSG00000169744	LDB2	0.29085	0.276879	0.187838	promoter
15	ENSG00000170579	DLGAP1	0.293706	0.342355	0.332738	enhancer
15	ENSG00000174145	NWD2	0.419349	0.0520424	0.267082	promoter
15	ENSG00000176769	TCERG1L	0.337926	0.0802734	0.473563	TF
15	ENSG00000185742	C11orf87	0.082323	0.450399	0.30745	enhancer
15	ENSG00000186998	EMID1	0.129762	0.186555	0.304792	TF
15	ENSG00000188419	CHM	0.186501	0.127309	0.367493	TF
15	ENSG00000204103	MAFB	0.0761275	0.274983	0.637548	TF
15	ENSG00000205269	TMEM170B	0.087406	0.00278222	0.125979	TF
15	ENSG00000225756	DBH-AS1	0.0962684	0.495085	0.305444	enhancer
15	ENSG00000230839	RP5-968J1.1	0.249592	0.0728476	0.502591	TF
15	ENSG00000231680	AP003774.6	0.329297	0.232959	0.351574	TF
15	ENSG00000249258	RP11-468H14.2	0.48157	0.102846	0.180957	promoter
15	ENSG00000254664	CTD-2560E9.3	0.223035	0.205272	0.223068	TF
15	ENSG00000137261	KIAA0319	0.277967	0.537787	0.144869	enhancer
15	ENSG00000140519	RHCG	0.384384	0.373407	0.138091	promoter
15	ENSG00000149636	DSN1	0.198451	0.153376	0.372485	TF
15	ENSG00000224805	LINC00853	0.205188	0.187247	0.0017988	promoter
15	ENSG00000230054	RP11-402G3.5	0.0584303	0.790602	0.0136517	enhancer
15	ENSG00000232406	RP11-234K24.3	0.109419	0.360538	0.168328	enhancer
15	ENSG00000256443	RP11-794G24.1	0.333155	0.346225	0.0529703	enhancer
15	ENSG00000059691	GATB	0.508065	0.24555	0.176889	promoter
15	ENSG00000078053	AMPH	0.0629057	0.0947222	0.633351	TF
15	ENSG00000079156	OSBPL6	0.028376	0.202989	0.146903	enhancer
15	ENSG00000102468	HTR2A	0.272705	0.280752	0.408736	TF
15	ENSG00000107518	ATRNL1	0.333714	0.513952	0.142624	enhancer
15	ENSG00000134490	TMEM241	0.0682156	0.631323	0.230363	enhancer
15	ENSG00000143499	SMYD2	0.187082	0.205124	0.512014	TF
15	ENSG00000144407	PTH2R	0.254475	0.0928818	0.307627	TF
15	ENSG00000146263	MMS22L	0.257052	0.300875	0.253428	enhancer
15	ENSG00000160326	SLC2A6	0.117333	0.179336	0.409262	TF
15	ENSG00000163624	CDS1	0.248588	0.103892	0.525589	TF
15	ENSG00000165355	FBXO33	0.159233	0.21652	0.548322	TF
15	ENSG00000169641	LUZP1	0.0784986	0.63474	0.0911556	enhancer
15	ENSG00000184349	EFNA5	0.473763	0.212964	0.238176	promoter
15	ENSG00000198860	TSEN15	0.333461	0.277049	0.281344	promoter
15	ENSG00000229672	RP11-184A2.3	0.107861	0.181241	0.706695	TF
15	ENSG00000237233	TMEM26-AS1	0.0375854	0.0320473	0.892313	TF
15	ENSG00000074527	NTN4	0.433723	0.091563	0.148981	promoter
15	ENSG00000135821	GLUL	0.341422	0.292883	0.159121	promoter
15	ENSG00000145675	PIK3R1	0.349287	0.242165	0.347999	promoter
15	ENSG00000149305	HTR3B	0.0485295	0.22274	0.0349899	enhancer
15	ENSG00000157766	ACAN	0.372696	0.19605	0.236992	promoter
15	ENSG00000246363	RP11-13A1.1	0.0487364	0.145957	0.117477	enhancer
15	ENSG00000123500	COL10A1	0.0107646	0.0721914	0.449342	TF
15	ENSG00000143420	ENSA	0.194673	0.0573459	0.266475	TF
15	ENSG00000143494	VASH2	0.166888	0.125016	0.191306	TF
15	ENSG00000163995	ABLIM2	0.45025	0.135998	0.363413	promoter
15	ENSG00000239911	PRKAG2-AS1	0.0456255	0.338139	0.575308	TF
15	ENSG00000259704	CTD-3094K11.1	0.435055	0.309555	0.116822	promoter
15	ENSG00000178734	LMO7DN	0.373559	0.296429	0.0705521	promoter
15	ENSG00000236296	GUSBP5	0.0356119	0.0811319	0.124413	TF
16	ENSG00000134982	APC	0.168663	0.449882	0.108289	enhancer
16	ENSG00000144749	LRIG1	0.183453	0.266811	0.272686	TF
16	ENSG00000178295	GEN1	0.15154	0.0594089	0.246347	TF
16	ENSG00000226496	LINC00323	0.0774792	0.682524	0.233617	enhancer
16	ENSG00000053770	AP5M1	0.350086	0.0060468	0.231524	promoter
16	ENSG00000072840	EVC	0.0711812	0.169121	0.123236	enhancer
16	ENSG00000132854	KANK4	0.221166	0.547108	0.0284324	enhancer
16	ENSG00000140090	SLC24A4	0.424917	0.467807	0.0964774	enhancer
16	ENSG00000154229	PRKCA	0.190834	0.226518	0.430135	TF
16	ENSG00000168813	ZNF507	0.175691	0.569553	0.122926	enhancer
16	ENSG00000175093	SPSB4	0.199163	0.509265	0.180315	enhancer
16	ENSG00000235530	AC087294.2	0.0905104	0.141044	0.0794033	enhancer
16	ENSG00000105976	MET	0.174516	0.121519	0.655721	TF
16	ENSG00000166750	SLFN5	0.113726	0.0603658	0.0844514	promoter
16	ENSG00000249494	CTB-161M19.4	0.130082	0.0176101	0.048664	promoter
16	ENSG00000155052	CNTNAP5	0.379545	0.367263	0.162495	promoter
16	ENSG00000169507	SLC38A11	0.490886	0.177718	0.188385	promoter
16	ENSG00000183853	KIRREL	0.108485	0.114646	0.191248	TF
16	ENSG00000183908	LRRC55	0.298977	0.252249	0.351471	TF
16	ENSG00000185666	SYN3	0.244767	0.157642	0.532617	TF
16	ENSG00000133477	FAM83F	0.333689	0.296932	0.0288607	promoter
16	ENSG00000150275	PCDH15	0.0668376	0.152228	0.256634	TF
16	ENSG00000255345	CTD-2337I7.1	0.125645	0.28828	0.123678	enhancer
17	ENSG00000077232	DNAJC10	0.354795	0.332742	0.11243	promoter
17	ENSG00000077585	GPR137B	0.424237	0.475905	0.0454963	enhancer
17	ENSG00000080845	DLGAP4	0.464815	0.10506	0.328992	promoter
17	ENSG00000115423	DNAH6	0.359043	0.465319	0.0916048	enhancer
17	ENSG00000133048	CHI3L1	0.269229	0.459328	0.180941	enhancer
17	ENSG00000139410	SDSL	0.304187	0.414084	0.192188	enhancer
17	ENSG00000150628	SPATA4	0.402608	0.294304	0.16042	promoter
17	ENSG00000155189	AGPAT5	0.2431	0.548058	0.193005	enhancer
17	ENSG00000156049	GNA14	0.51109	0.361486	0.0395519	promoter
17	ENSG00000168243	GNG4	0.288887	0.561609	0.0772818	enhancer
17	ENSG00000169862	CTNND2	0.616678	0.172047	0.0790073	promoter
17	ENSG00000170891	CYTL1	0.273427	0.159363	0.342817	TF
17	ENSG00000180353	HCLS1	0.485512	0.29068	0.0948278	promoter
17	ENSG00000181191	PJA1	0.289347	0.0515105	0.141313	promoter
17	ENSG00000188266	HYKK	0.412388	0.177061	0.13713	promoter
17	ENSG00000221955	SLC12A8	0.200613	0.266011	0.0191566	enhancer
17	ENSG00000238217	AC093590.1	0.330187	0.463287	0.0238801	enhancer
17	ENSG00000260328	RP11-416I2.1	0.189788	0.20241	0.394504	TF
17	ENSG00000006210	CX3CL1	0.169557	0.169165	0.652244	TF
17	ENSG00000068615	REEP1	0.133306	0.205059	0.510701	TF
17	ENSG00000072952	MRVI1	0.0694431	0.531128	0.108414	enhancer
17	ENSG00000113645	WWC1	0.0501208	0.0255175	0.0701982	TF
17	ENSG00000124406	ATP8A1	0.06164	0.835258	0.0357936	enhancer
17	ENSG00000126016	AMOT	0.423813	0.0829148	0.269118	promoter
17	ENSG00000136908	DPM2	0.0889247	0.185774	0.477842	TF
17	ENSG00000138759	FRAS1	0.619012	0.121065	0.0760096	promoter
17	ENSG00000151012	SLC7A11	0.134984	0.0235264	0.442777	TF
17	ENSG00000152932	RAB3C	0.309886	0.298917	0.154543	promoter
17	ENSG00000152953	STK32B	0.160302	0.161502	0.362425	TF
17	ENSG00000159423	ALDH4A1	0.369833	0.368233	0.0567134	promoter
17	ENSG00000166171	DPCD	0.209788	0.487676	0.199725	enhancer
17	ENSG00000166501	PRKCB	0.326655	0.183112	0.453365	TF
17	ENSG00000166974	MAPRE2	0.0307018	0.202006	0.0462928	enhancer
17	ENSG00000168077	SCARA3	0.308719	0.0362294	0.404173	TF
17	ENSG00000169188	APEX2	0.170722	0.341412	0.0945998	enhancer
17	ENSG00000226953	AC010890.1	0.325943	0.349848	0.234777	enhancer
17	ENSG00000105355	PLIN3	0.369417	0.180913	0.138859	promoter
17	ENSG00000136943	CTSV	0.290024	0.333923	0.219295	enhancer
17	ENSG00000256043	CTSO	0.469113	0.0553993	0.309908	promoter
17	ENSG00000072506	HSD17B10	0.20174	0.35701	0.313341	enhancer
17	ENSG00000106665	CLIP2	0.103079	0.467243	0.167781	enhancer
17	ENSG00000112242	E2F3	0.1619	0.274104	0.325108	TF
17	ENSG00000119938	PPP1R3C	0.653409	0.166547	0.0631308	promoter
17	ENSG00000133313	CNDP2	0.194655	0.287885	0.440248	TF
17	ENSG00000137449	CPEB2	0.125803	0.568848	0.274016	enhancer
17	ENSG00000145431	PDGFC	0.437728	0.146758	0.402581	promoter
17	ENSG00000146535	GNA12	0.192661	0.139018	0.271014	TF
17	ENSG00000148925	BTBD10	0.311054	0.263986	0.192435	promoter
17	ENSG00000151835	SACS	0.0917314	0.377824	0.339703	enhancer
17	ENSG00000157445	CACNA2D3	0.123681	0.370868	0.438945	TF
17	ENSG00000163820	FYCO1	0.272564	0.274326	0.295696	TF
17	ENSG00000164530	PI16	0.2707	0.289744	0.330595	TF
17	ENSG00000177189	RPS6KA3	0.0573999	0.0481934	0.493815	TF
17	ENSG00000203778	FAM229B	0.325843	0.403764	0.201715	enhancer
17	ENSG00000087253	LPCAT2	0.305603	0.536413	0.0874435	enhancer
17	ENSG00000130956	HABP4	0.415375	0.320388	0.0372996	promoter
17	ENSG00000145247	OCIAD2	0.304771	0.468278	0.149552	enhancer
17	ENSG00000203280	CTA-221G9.12	0.0484743	0.0862084	0.536598	TF
18	ENSG00000006116	CACNG3	0.205484	0.235967	0.481295	TF
18	ENSG00000081277	PKP1	0.150087	0.220239	0.254683	TF
18	ENSG00000112799	LY86	0.0219256	0.0382874	0.183202	TF
18	ENSG00000117419	ERI3	0.311625	0.202622	0.436959	TF
18	ENSG00000122515	ZMIZ2	0.391895	0.189628	0.232965	promoter
18	ENSG00000132164	SLC6A11	0.370523	0.39539	0.0774936	enhancer
18	ENSG00000164309	CMYA5	0.145457	0.13402	0.126826	promoter
18	ENSG00000183579	ZNRF3	0.0685707	0.0477712	0.198445	TF
18	ENSG00000196878	LAMB3	0.524943	0.242725	0.139405	promoter
18	ENSG00000213938	SEPHS1P6	0.226789	0.173141	0.57734	TF
18	ENSG00000214174	AMZ2P1	0.217484	0.259543	0.106122	enhancer
18	ENSG00000248208	RP11-153M7.1	0.20391	0.276098	0.143742	enhancer
18	ENSG00000250771	RP11-153M7.3	0.08781	0.251634	0.251667	TF
18	ENSG00000108846	ABCC3	0.352857	0.395501	0.222968	enhancer
18	ENSG00000166741	NNMT	0.175003	0.332907	0.0491227	enhancer
18	ENSG00000168748	CA7	0.0432025	0.307718	0.378122	TF
18	ENSG00000188921	HACD4	0.221724	0.22304	0.0619946	enhancer
18	ENSG00000232490	OSBPL10-AS1	0.573826	0.318625	0.0640667	promoter
18	ENSG00000233064	RP3-380B8.4	0.179954	0.374984	0.283054	enhancer
18	ENSG00000234444	ZNF736	0.369482	0.0804902	0.0305925	promoter
18	ENSG00000260634	RP11-521O16.1	0.392842	0.0449526	0.327524	promoter
18	ENSG00000118785	SPP1	0.265157	0.251206	0.16817	promoter
18	ENSG00000125895	TMEM74B	0.297112	0.258371	0.347958	TF
18	ENSG00000172803	SNX32	0.322219	0.257887	0.225079	promoter
18	ENSG00000198108	CHSY3	0.799245	0.0840728	0.080962	promoter
18	ENSG00000122696	SLC25A51	0.080858	0.637853	0.05601	enhancer
18	ENSG00000154146	NRGN	0.194225	0.134825	0.418428	TF
19	ENSG00000011426	ANLN	0.0966576	0.294064	0.322925	TF
19	ENSG00000015133	CCDC88C	0.276614	0.622325	0.0883631	enhancer
19	ENSG00000023892	DEF6	0.132927	0.102119	0.112844	promoter
19	ENSG00000057704	TMCC3	0.383694	0.324804	0.211365	promoter
19	ENSG00000070214	SLC44A1	0.0215366	0.871381	0.0364782	enhancer
19	ENSG00000075618	FSCN1	0.515656	0.0703284	0.116937	promoter
19	ENSG00000091513	TF	0.57597	0.151094	0.21486	promoter
19	ENSG00000101104	PABPC1L	0.367892	0.537456	0.0392931	enhancer
19	ENSG00000103550	KNOP1	0.0733397	0.534493	0.324043	enhancer
19	ENSG00000110315	RNF141	0.17193	0.552428	0.114762	enhancer
19	ENSG00000111335	OAS2	0.173874	0.107556	0.433594	TF
19	ENSG00000114547	ROPN1B	0.124769	0.0848328	0.436819	TF
19	ENSG00000115155	OTOF	0.229642	0.49137	0.127895	enhancer
19	ENSG00000117592	PRDX6	0.352342	0.298187	0.23097	promoter
19	ENSG00000121690	DEPDC7	0.607021	0.333636	0.0106559	promoter
19	ENSG00000122367	LDB3	0.356436	0.355261	0.0984871	promoter
19	ENSG00000122585	NPY	0.408876	0.0752587	0.0880485	promoter
19	ENSG00000127946	HIP1	0.118184	0.50392	0.0961632	enhancer
19	ENSG00000131379	C3orf20	0.285897	0.313436	0.192843	enhancer
19	ENSG00000132840	BHMT2	0.0497006	0.0728598	0.24383	TF
19	ENSG00000136273	HUS1	0.233278	0.195373	0.507296	TF
19	ENSG00000136541	ERMN	0.351406	0.290655	0.267418	promoter
19	ENSG00000137221	TJAP1	0.0285703	0.696621	0.0505106	enhancer
19	ENSG00000146453	PNLDC1	0.507798	0.219276	0.0694185	promoter
19	ENSG00000147454	SLC25A37	0.268985	0.332383	0.22574	enhancer
19	ENSG00000147533	GOLGA7	0.0979127	0.695856	0.0820555	enhancer
19	ENSG00000149243	KLHL35	0.0620784	0.129218	0.149228	TF
19	ENSG00000157985	AGAP1	0.136351	0.5302	0.27811	enhancer
19	ENSG00000164627	KIF6	0.450291	0.420856	0.0319457	promoter
19	ENSG00000165025	SYK	0.639357	0.213837	0.0951968	promoter
19	ENSG00000167676	PLIN4	0.0161849	0.0838778	0.0610909	enhancer
19	ENSG00000167995	BEST1	0.508414	0.38418	0.0099257	promoter
19	ENSG00000174607	UGT8	0.519642	0.389253	0.0198726	promoter
19	ENSG00000178722	C5orf64	0.456452	0.408872	0.0596659	promoter
19	ENSG00000180769	WDFY3-AS2	0.139741	0.58796	0.134416	enhancer
19	ENSG00000184809	B3GALT5-AS1	0.674926	0.22876	0.0758666	promoter
19	ENSG00000187554	TLR5	0.19924	0.328502	0.258951	enhancer
19	ENSG00000196104	SPOCK3	0.409336	0.45088	0.0602185	enhancer
19	ENSG00000197943	PLCG2	0.0963198	0.175014	0.317715	TF
19	ENSG00000198420	TCAF1	0.317351	0.227835	0.199318	promoter
19	ENSG00000203797	DDO	0.0067826	0.677015	0.307214	enhancer
19	ENSG00000204161	C10orf128	0.661172	0.0540374	0.108342	promoter
19	ENSG00000214290	COLCA2	0.410618	0.341339	0.0990443	promoter
19	ENSG00000226828	RP11-278H7.1	0.646419	0.071643	0.130597	promoter
19	ENSG00000228793	RP1-223B1.1	0.298747	0.407971	0.171744	enhancer
19	ENSG00000229116	RP11-20J15.3	0.591705	0.190894	0.0536166	promoter
19	ENSG00000231971	RP11-557H15.3	0.390061	0.562689	0.0190061	enhancer
19	ENSG00000235020	RP11-109I13.2	0.637669	0.123594	0.17317	promoter
19	ENSG00000235180	LINC00601	0.362083	0.536488	0.0207232	enhancer
19	ENSG00000260788	RP11-298D21.1	0.320425	0.33683	0.230265	enhancer
19	ENSG00000263327	TAPT1-AS1	0.0248883	0.497476	0.0247596	enhancer
19	ENSG00000266248	CTC-525D6.2	0.098156	0.194188	0.0945928	enhancer
19	ENSG00000065534	MYLK	0.105285	0.186645	0.701669	TF
19	ENSG00000078401	EDN1	0.137665	0.261877	0.221768	enhancer
19	ENSG00000102032	RENBP	0.587286	0.0773034	0.182983	promoter
19	ENSG00000106025	TSPAN12	0.139243	0.171227	0.568618	TF
19	ENSG00000106948	AKNA	0.493306	0.406978	0.0367442	promoter
19	ENSG00000107738	C10orf54	0.33415	0.160888	0.136653	promoter
19	ENSG00000110786	PTPN5	0.433936	0.340163	0.15535	promoter
19	ENSG00000111452	ADGRD1	0.311528	0.075666	0.0239303	promoter
19	ENSG00000112541	PDE10A	0.312309	0.321864	0.358133	TF
19	ENSG00000113749	HRH2	0.173571	0.257718	0.451823	TF
19	ENSG00000123360	PDE1B	0.00511946	0.000906885	0.0343581	TF
19	ENSG00000133466	C1QTNF6	0.0765063	0.226924	0.025199	enhancer
19	ENSG00000135929	CYP27A1	0.349976	0.327529	0.115223	promoter
19	ENSG00000138135	CH25H	0.0665942	0.234352	0.231251	enhancer
19	ENSG00000138593	SECISBP2L	0.21018	0.394177	0.35235	enhancer
19	ENSG00000141179	PCTP	0.270125	0.168995	0.124472	promoter
19	ENSG00000153208	MERTK	0.292502	0.0946064	0.168706	promoter
19	ENSG00000154856	APCDD1	0.148957	0.124557	0.0336116	promoter
19	ENSG00000158966	CACHD1	0.371123	0.144129	0.287392	promoter
19	ENSG00000162980	ARL5A	0.215349	0.334116	0.0758439	enhancer
19	ENSG00000166033	HTRA1	0.292992	0.332295	0.12974	enhancer
19	ENSG00000171208	NETO2	0.0612484	0.0971042	0.743833	TF
19	ENSG00000183580	FBXL7	0.44066	0.348545	0.0989574	promoter
19	ENSG00000186350	RXRA	0.35794	0.223659	0.244133	promoter
19	ENSG00000203727	SAMD5	0.0480307	0.478698	0.0620199	enhancer
19	ENSG00000224950	RP5-1086K13.1	0.253801	0.602157	0.105517	enhancer
19	ENSG00000226403	RP11-31F19.1	0.262023	0.354995	0.103586	enhancer
19	ENSG00000227466	RP11-397C12.1	0.212175	0.303593	0.220075	enhancer
19	ENSG00000245293	RP11-286E11.1	0.537849	0.198795	0.159005	promoter
19	ENSG00000246174	KCTD21-AS1	0.0622676	0.144593	0.162996	TF
19	ENSG00000247287	RP11-902B17.1	0.369214	0.354033	0.135046	promoter
19	ENSG00000249853	HS3ST5	0.44089	0.405817	0.0701545	promoter
19	ENSG00000255872	RP11-613M10.9	0.414377	0.403114	0.079503	promoter
19	ENSG00000262585	RP11-353N14.5	0.462127	0.35166	0.105237	promoter
19	ENSG00000035664	DAPK2	0.248453	0.182536	0.323825	TF
19	ENSG00000047365	ARAP2	0.343468	0.369791	0.210876	enhancer
19	ENSG00000049245	VAMP3	0.429678	0.0341969	0.291137	promoter
19	ENSG00000079435	LIPE	0.339236	0.394265	0.0987154	enhancer
19	ENSG00000104313	EYA1	0.296335	0.555845	0.0546523	enhancer
19	ENSG00000114200	BCHE	0.104475	0.0530626	0.560174	TF
19	ENSG00000115687	PASK	0.242886	0.116438	0.142946	promoter
19	ENSG00000128242	GAL3ST1	0.437931	0.425969	0.0657531	promoter
19	ENSG00000131725	WDR44	0.100908	0.469397	0.285793	enhancer
19	ENSG00000134146	DPH6	0.144208	0.256915	0.514804	TF
19	ENSG00000156384	SFR1	0.161746	0.505328	0.125332	enhancer
19	ENSG00000167210	LOXHD1	0.159411	0.039441	0.700843	TF
19	ENSG00000169989	TIGD4	0.0595032	0.0219489	0.716223	TF
19	ENSG00000187773	FAM69C	0.303989	0.313358	0.263079	enhancer
19	ENSG00000196814	MVB12B	0.230487	0.527539	0.0866321	enhancer
19	ENSG00000257800	FNBP1P1	0.123119	0.270079	0.551018	TF
19	ENSG00000076864	RAP1GAP	0.225333	0.387759	0.188338	enhancer
19	ENSG00000100485	SOS2	0.488977	0.130859	0.347898	promoter
19	ENSG00000115993	TRAK2	0.546247	0.112334	0.218856	promoter
19	ENSG00000125703	ATG4C	0.0910672	0.562259	0.328732	enhancer
19	ENSG00000128578	STRIP2	0.31688	0.54181	0.111925	enhancer
19	ENSG00000137269	LRRC1	0.434225	0.318149	0.142205	promoter
19	ENSG00000140600	SH3GL3	0.0500384	0.266458	0.614717	TF
19	ENSG00000150636	CCDC102B	0.233158	0.452207	0.234581	enhancer
19	ENSG00000150867	PIP4K2A	0.476098	0.391355	0.0907729	promoter
19	ENSG00000158352	SHROOM4	0.492323	0.239973	0.185623	promoter
19	ENSG00000158748	HTR6	0.180996	0.55086	0.207361	enhancer
19	ENSG00000159658	EFCAB14	0.239588	0.58791	0.135937	enhancer
19	ENSG00000165714	BORCS5	0.489126	0.186318	0.275068	promoter
19	ENSG00000169504	CLIC4	0.430798	0.43231	0.0822167	enhancer
19	ENSG00000171877	FRMD5	0.0744126	0.767504	0.131957	enhancer
19	ENSG00000172340	SUCLG2	0.369201	0.245497	0.281431	promoter
19	ENSG00000172728	FUT10	0.0246418	0.0621947	0.0187741	enhancer
19	ENSG00000173482	PTPRM	0.226901	0.424623	0.299888	enhancer
19	ENSG00000184845	DRD1	0.036628	0.391234	0.33916	enhancer
19	ENSG00000186231	KLHL32	0.151533	0.460163	0.262967	enhancer
19	ENSG00000187109	NAP1L1	0.310721	0.0244923	0.434148	TF
19	ENSG00000187801	ZFP69B	0.369226	0.347642	0.0950476	promoter
19	ENSG00000230876	LINC00486	0.352463	0.51621	0.06902	enhancer
19	ENSG00000232520	AC012507.3	0.287896	0.226768	0.228901	promoter
19	ENSG00000240687	RP11-521D12.1	0.430426	0.441107	0.088166	enhancer
19	ENSG00000253924	RP11-1023P17.2	0.280858	0.313525	0.222551	enhancer
19	ENSG00000042062	FAM65C	0.109894	0.335523	0.0732792	enhancer
19	ENSG00000129932	DOHH	0.226239	0.53933	0.139474	enhancer
19	ENSG00000166147	FBN1	0.411434	0.343496	0.233182	promoter
19	ENSG00000224177	LINC00570	0.265327	0.496704	0.179421	enhancer
19	ENSG00000225331	AP001055.6	0.535212	0.0640369	0.351958	promoter
19	ENSG00000254251	RP11-662G23.1	0.306961	0.242041	0.132979	promoter
19	ENSG00000261195	CTD-2380F24.1	0.347027	0.0783991	0.389383	TF
19	ENSG00000264529	RP11-556O9.3	0.182834	0.574379	0.019487	enhancer
19	ENSG00000068650	ATP11A	0.0752594	0.413399	0.226542	enhancer
19	ENSG00000081479	LRP2	0.312902	0.376026	0.0772048	enhancer
19	ENSG00000104067	TJP1	0.0311826	0.750005	0.0699348	enhancer
19	ENSG00000119411	BSPRY	0.271882	0.19016	0.0694181	promoter
19	ENSG00000140577	CRTC3	0.0482255	0.848748	0.0709361	enhancer
19	ENSG00000144815	NXPE3	0.0495765	0.637956	0.0371099	enhancer
19	ENSG00000164300	SERINC5	0.185414	0.594634	0.0230062	enhancer
20	ENSG00000007866	TEAD3	0.153798	0.0843867	0.0388322	promoter
20	ENSG00000049323	LTBP1	0.105428	0.0605405	0.172927	TF
20	ENSG00000112562	SMOC2	0.0603134	0.101521	0.260731	TF
20	ENSG00000125347	IRF1	0.119086	0.0828837	0.0884509	promoter
20	ENSG00000131873	CHSY1	0.112331	0.343055	0.192984	enhancer
20	ENSG00000140092	FBLN5	0.0868233	0.407759	0.037665	enhancer
20	ENSG00000160410	SHKBP1	0.116137	0.305199	0.432986	TF
20	ENSG00000162551	ALPL	0.186076	0.0649416	0.131266	promoter
20	ENSG00000162869	PPP1R21	0.58653	0.0952708	0.115744	promoter
20	ENSG00000170312	CDK1	0.242575	0.158936	0.475001	TF
20	ENSG00000172403	SYNPO2	0.306108	0.0725514	0.039809	promoter
20	ENSG00000173559	NABP1	0.252012	0.257564	0.196648	enhancer
20	ENSG00000187513	GJA4	0.161425	0.114132	0.192603	TF
20	ENSG00000225383	SFTA1P	0.0234878	0.0359502	0.727891	TF
20	ENSG00000231024	AC092431.3	0.0573428	0.0484439	0.793048	TF
20	ENSG00000120156	TEK	0.0862957	0.417355	0.271525	enhancer
20	ENSG00000123405	NFE2	0.0048978	0.00684446	0.0218285	TF
20	ENSG00000137834	SMAD6	0.23038	0.330888	0.106138	enhancer
20	ENSG00000148488	ST8SIA6	0.0663479	0.0881804	0.172004	TF
20	ENSG00000163520	FBLN2	0.0577474	0.179546	0.0577726	enhancer
20	ENSG00000220412	RP11-95M15.2	0.128367	0.0962837	0.401221	TF
20	ENSG00000229619	MBNL1-AS1	0.0686479	0.117048	0.716374	TF
20	ENSG00000109189	USP46	0.160309	0.0967836	0.0959812	promoter
20	ENSG00000148153	INIP	0.203482	0.0698736	0.404931	TF
20	ENSG00000175575	PAAF1	0.237026	0.332934	0.360263	TF
20	ENSG00000124212	PTGIS	0.0506602	0.0345841	0.0292987	promoter
20	ENSG00000197445	C16orf47	0.268043	0.635258	0.0723132	enhancer
21	ENSG00000078304	PPP2R5C	0.431155	0.0759841	0.253798	promoter
21	ENSG00000078967	UBE2D4	0.0704011	0.0969532	0.10894	TF
21	ENSG00000082684	SEMA5B	0.306963	0.0767015	0.373745	TF
21	ENSG00000099800	TIMM13	0.0621511	0.0325826	0.0890204	TF
21	ENSG00000102595	UGGT2	0.240362	0.380698	0.288765	enhancer
21	ENSG00000104671	DCTN6	0.54668	0.036961	0.143702	promoter
21	ENSG00000112981	NME5	0.434684	0.345558	0.108191	promoter
21	ENSG00000134779	TPGS2	0.702967	0.0757633	0.137778	promoter
21	ENSG00000143226	FCGR2A	0.212375	0.0727985	0.193705	promoter
21	ENSG00000147364	FBXO25	0.0710059	0.048759	0.472202	TF
21	ENSG00000147684	NDUFB9	0.698045	0.186838	0.0267971	promoter
21	ENSG00000148604	RGR	0.416943	0.229506	0.1601	promoter
21	ENSG00000152380	FAM151B	0.452718	0.0647539	0.447199	promoter
21	ENSG00000162522	KIAA1522	0.154923	0.279386	0.302767	TF
21	ENSG00000163191	S100A11	0.270532	0.213967	0.184181	promoter
21	ENSG00000163430	FSTL1	0.0541788	0.0453903	0.6442	TF
21	ENSG00000165672	PRDX3	0.304598	0.142094	0.437136	TF
21	ENSG00000167992	VWCE	0.220768	0.127273	0.592148	TF
21	ENSG00000171811	CFAP46	0.36104	0.149825	0.450643	TF
21	ENSG00000181350	LRRC75A	0.204969	0.32173	0.292737	enhancer
21	ENSG00000182481	KPNA2	0.115716	0.205208	0.100526	enhancer
21	ENSG00000184156	KCNQ3	0.261748	0.320272	0.227036	enhancer
21	ENSG00000205037	RP11-863P13.4	0.283835	0.112054	0.21267	promoter
21	ENSG00000225106	RP11-429E11.2	0.428761	0.300859	0.183467	promoter
21	ENSG00000226380	AC058791.1	0.10967	0.130559	0.00309342	enhancer
21	ENSG00000023516	AKAP11	0.24682	0.113751	0.607118	TF
21	ENSG00000092969	TGFB2	0.651599	0.247663	0.0496215	promoter
21	ENSG00000101134	DOK5	0.256477	0.2758	0.339279	TF
21	ENSG00000102385	DRP2	0.490594	0.320334	0.0130719	promoter
21	ENSG00000114757	PEX5L	0.287443	0.366405	0.124524	enhancer
21	ENSG00000118523	CTGF	0.189804	0.426131	0.00579838	enhancer
21	ENSG00000122870	BICC1	0.529162	0.202988	0.241053	promoter
21	ENSG00000131019	ULBP3	0.297491	0.154863	0.126964	promoter
21	ENSG00000134121	CHL1	0.450157	0.0654143	0.335804	promoter
21	ENSG00000134909	ARHGAP32	0.261832	0.163355	0.302443	TF
21	ENSG00000139220	PPFIA2	0.58703	0.178602	0.0463157	promoter
21	ENSG00000143742	SRP9	0.36461	0.0857043	0.0788005	promoter
21	ENSG00000144229	THSD7B	0.376627	0.162223	0.260844	promoter
21	ENSG00000145703	IQGAP2	0.0998387	0.337783	0.328903	enhancer
21	ENSG00000153130	SCOC	0.475955	0.261656	0.104538	promoter
21	ENSG00000153956	CACNA2D1	0.331847	0.13162	0.499871	TF
21	ENSG00000157613	CREB3L1	0.434175	0.0145277	0.180713	promoter
21	ENSG00000160293	VAV2	0.386583	0.218433	0.236408	promoter
21	ENSG00000163075	CFAP221	0.315722	0.35387	0.149832	enhancer
21	ENSG00000165490	DDIAS	0.354515	0.110277	0.253413	promoter
21	ENSG00000168830	HTR1E	0.354084	0.430905	0.15345	enhancer
21	ENSG00000184009	ACTG1	0.141855	0.512335	0.035968	enhancer
21	ENSG00000214944	ARHGEF28	0.052849	0.451149	0.169031	enhancer
21	ENSG00000259985	RP11-549B18.1	0.103344	0.0150064	0.0593422	promoter
21	ENSG00000272078	RP4-734G22.3	0.161731	0.0842321	0.141096	promoter
21	ENSG00000005059	CCDC109B	0.0346638	0.462938	0.231822	enhancer
21	ENSG00000015592	STMN4	0.346351	0.438682	0.11273	enhancer
21	ENSG00000054392	HHAT	0.0375879	0.632464	0.0446168	enhancer
21	ENSG00000139044	B4GALNT3	0.385477	0.140761	0.241015	promoter
21	ENSG00000198937	CCDC167	0.183183	0.186242	0.125782	enhancer
21	ENSG00000251000	AC008592.3	0.137687	0.292179	0.382869	TF
21	ENSG00000091129	NRCAM	0.179899	0.362117	0.318351	enhancer
21	ENSG00000112186	CAP2	0.124257	0.0962321	0.218949	TF
21	ENSG00000122778	KIAA1549	0.28493	0.358767	0.250497	enhancer
21	ENSG00000124831	LRRFIP1	0.38996	0.329447	0.26196	promoter
21	ENSG00000133019	CHRM3	0.302559	0.403089	0.0100857	enhancer
21	ENSG00000133083	DCLK1	0.337121	0.396276	0.0768177	enhancer
21	ENSG00000136099	PCDH8	0.0751421	0.215961	0.109143	enhancer
21	ENSG00000151079	KCNA6	0.254295	0.235263	0.426077	TF
21	ENSG00000151490	PTPRO	0.129469	0.116075	0.750132	TF
21	ENSG00000160310	PRMT2	0.244339	0.0331833	0.418869	TF
21	ENSG00000168539	CHRM1	0.299697	0.139069	0.478064	TF
21	ENSG00000168894	RNF181	0.1308	0.212848	0.327777	TF
21	ENSG00000169851	PCDH7	0.530508	0.160517	0.244888	promoter
21	ENSG00000186260	MKL2	0.257695	0.189696	0.269722	TF
21	ENSG00000198919	DZIP3	0.201649	0.111655	0.632671	TF
21	ENSG00000230989	HSBP1	0.0638723	0.139694	0.425175	TF
21	ENSG00000246375	RP11-10L7.1	0.361428	0.0857824	0.328938	promoter
21	ENSG00000249241	AC195454.1	0.181474	0.0786767	0.343848	TF
21	ENSG00000078018	MAP2	0.10128	0.224566	0.48334	TF
21	ENSG00000183155	RABIF	0.209262	0.213445	0.560808	TF
22	ENSG00000013288	MAN2B2	0.039561	0.150856	0.590343	TF
22	ENSG00000013293	SLC7A14	0.0970927	0.364492	0.106999	enhancer
22	ENSG00000034239	EFCAB1	0.203469	0.298053	0.0609539	enhancer
22	ENSG00000065882	TBC1D1	0.10906	0.0525144	0.11191	TF
22	ENSG00000101194	SLC17A9	0.163609	0.00688467	0.0892807	promoter
22	ENSG00000107130	NCS1	0.206576	0.158098	0.542138	TF
22	ENSG00000120708	TGFBI	0.0532228	0.274652	0.121822	enhancer
22	ENSG00000122490	PQLC1	0.179428	0.296717	0.350021	TF
22	ENSG00000122863	CHST3	0.219816	0.16298	0.535347	TF
22	ENSG00000134531	EMP1	0.161167	0.283225	0.035399	enhancer
22	ENSG00000136235	GPNMB	0.278808	0.271073	0.0302857	promoter
22	ENSG00000140057	AK7	0.209511	0.460204	0.185974	enhancer
22	ENSG00000144649	FAM198A	0.240477	0.285942	0.407155	TF
22	ENSG00000145491	ROPN1L	0.285221	0.0744167	0.456158	TF
22	ENSG00000145920	CPLX2	0.138562	0.140601	0.668721	TF
22	ENSG00000147065	MSN	0.230777	0.254673	0.386289	TF
22	ENSG00000152315	KCNK13	0.11815	0.0699108	0.316934	TF
22	ENSG00000152990	ADGRA3	0.0920209	0.426224	0.43617	TF
22	ENSG00000160991	ORAI2	0.218339	0.215737	0.320296	TF
22	ENSG00000163132	MSX1	0.40877	0.0497511	0.0315719	promoter
22	ENSG00000163453	IGFBP7	0.259271	0.165798	0.421342	TF
22	ENSG00000168306	ACOX2	0.165742	0.0729134	0.225836	TF
22	ENSG00000177994	C2orf73	0.266365	0.415308	0.271347	enhancer
22	ENSG00000179270	C2orf71	0.503489	0.223462	0.171041	promoter
22	ENSG00000182175	RGMA	0.276876	0.0564092	0.37651	TF
22	ENSG00000183346	C10orf107	0.18398	0.19217	0.451822	TF
22	ENSG00000183479	TREX2	0.373088	0.158067	0.0628277	promoter
22	ENSG00000183508	FAM46C	0.179991	0.092083	0.0917494	promoter
22	ENSG00000185100	ADSSL1	0.678915	0.166021	0.0568248	promoter
22	ENSG00000188596	CFAP54	0.242792	0.350017	0.194077	enhancer
22	ENSG00000223401	RP11-211G3.2	0.159643	0.205774	0.199292	enhancer
22	ENSG00000228649	AC005682.5	0.0897615	0.0887103	0.491316	TF
22	ENSG00000228983	SLC47A1P1	0.326941	0.181875	0.0987768	promoter
22	ENSG00000235665	LINC00298	0.406163	0.534262	0.0208764	enhancer
22	ENSG00000010818	HIVEP2	0.285604	0.383597	0.0706288	enhancer
22	ENSG00000070159	PTPN3	0.163425	0.235738	0.216279	enhancer
22	ENSG00000077943	ITGA8	0.276277	0.153485	0.150824	promoter
22	ENSG00000101327	PDYN	0.139292	0.100145	0.115469	promoter
22	ENSG00000110328	GALNT18	0.072558	0.192482	0.189553	enhancer
22	ENSG00000111647	UHRF1BP1L	0.226958	0.120379	0.422802	TF
22	ENSG00000113494	PRLR	0.140634	0.457109	0.285596	enhancer
22	ENSG00000114450	GNB4	0.0420561	0.0510942	0.0164295	enhancer
22	ENSG00000115159	GPD2	0.0340767	0.324234	0.0394889	enhancer
22	ENSG00000118194	TNNT2	0.44696	0.264984	0.048575	promoter
22	ENSG00000125257	ABCC4	0.496971	0.171954	0.277739	promoter
22	ENSG00000130413	STK33	0.267341	0.0163025	0.286843	TF
22	ENSG00000132561	MATN2	0.0419983	0.0650289	0.377933	TF
22	ENSG00000134247	PTGFRN	0.412408	0.29132	0.205542	promoter
22	ENSG00000134463	ECHDC3	0.380139	0.149382	0.314257	promoter
22	ENSG00000136378	ADAMTS7	0.278478	0.352354	0.11787	enhancer
22	ENSG00000137573	SULF1	0.0917309	0.0881529	0.284142	TF
22	ENSG00000141040	ZNF287	0.0530446	0.0302487	0.0382073	promoter
22	ENSG00000144893	MED12L	0.337509	0.248207	0.0395307	promoter
22	ENSG00000146376	ARHGAP18	0.166986	0.243913	0.166612	enhancer
22	ENSG00000147383	NSDHL	0.237283	0.124232	0.55588	TF
22	ENSG00000151532	VTI1A	0.287414	0.363745	0.219932	enhancer
22	ENSG00000157856	DRC1	0.063723	0.835532	0.081756	enhancer
22	ENSG00000158258	CLSTN2	0.100093	0.125985	0.734265	TF
22	ENSG00000162148	PPP1R32	0.146136	0.28024	0.397114	TF
22	ENSG00000162337	LRP5	0.300417	0.444592	0.0899946	enhancer
22	ENSG00000162512	SDC3	0.0601841	0.262074	0.463716	TF
22	ENSG00000165588	OTX2	0.360727	0.359882	0.279306	promoter
22	ENSG00000168702	LRP1B	0.0226812	0.0192614	0.207553	TF
22	ENSG00000182463	TSHZ2	0.352008	0.0945722	0.316502	promoter
22	ENSG00000186479	RGS7BP	0.380455	0.0038583	0.368182	promoter
22	ENSG00000240891	PLCXD2	0.0895908	0.141752	0.0538461	enhancer
22	ENSG00000249693	THEGL	0.0126348	0.0715014	0.0288497	enhancer
22	ENSG00000095303	PTGS1	0.121456	0.268463	0.195391	enhancer
22	ENSG00000104611	SH2D4A	0.589847	0.13814	0.0744286	promoter
22	ENSG00000131951	LRRC9	0.0932919	0.212731	0.179103	enhancer
22	ENSG00000163071	SPATA18	0.151492	0.339499	0.0586738	enhancer
22	ENSG00000040933	INPP4A	0.189418	0.201866	0.136919	enhancer
22	ENSG00000071282	LMCD1	0.160745	0.314519	0.302818	enhancer
22	ENSG00000077235	GTF3C1	0.393916	0.0425237	0.265741	promoter
22	ENSG00000078725	BRINP1	0.12123	0.153854	0.149911	enhancer
22	ENSG00000081059	TCF7	0.207236	0.0480735	0.369837	TF
22	ENSG00000081985	IL12RB2	0.277614	0.222927	0.0992574	promoter
22	ENSG00000082458	DLG3	0.120395	0.0936065	0.630618	TF
22	ENSG00000096093	EFHC1	0.502857	0.0392805	0.183315	promoter
22	ENSG00000103222	ABCC1	0.292791	0.442241	0.0287582	enhancer
22	ENSG00000116717	GADD45A	0.251931	0.471278	0.236354	enhancer
22	ENSG00000130226	DPP6	0.0145842	0.0116732	0.0608362	TF
22	ENSG00000130508	PXDN	0.104173	0.143714	0.330326	TF
22	ENSG00000131480	AOC2	0.695184	0.128769	0.147595	promoter
22	ENSG00000133116	KL	0.237175	0.598423	0.0785901	enhancer
22	ENSG00000134830	C5AR2	0.227488	0.132027	0.108645	promoter
22	ENSG00000137474	MYO7A	0.293663	0.347521	0.281086	enhancer
22	ENSG00000137513	NARS2	0.306546	0.161398	0.225543	promoter
22	ENSG00000138131	LOXL4	0.114359	0.126717	0.586381	TF
22	ENSG00000142621	FHAD1	0.264903	0.221753	0.145364	promoter
22	ENSG00000144061	NPHP1	0.423357	0.435372	0.138525	enhancer
22	ENSG00000146555	SDK1	0.00870778	0.50633	0.111956	enhancer
22	ENSG00000157404	KIT	0.132693	0.087813	0.637923	TF
22	ENSG00000158023	WDR66	0.0644873	0.229611	0.62874	TF
22	ENSG00000160563	MED27	0.232763	0.49662	0.259471	enhancer
22	ENSG00000163814	CDCP1	0.15933	0.340956	0.229259	enhancer
22	ENSG00000165309	ARMC3	0.369897	0.340693	0.202987	promoter
22	ENSG00000168234	TTC39C	0.10813	0.337073	0.550107	TF
22	ENSG00000169783	LINGO1	0.173389	0.171648	0.338074	TF
22	ENSG00000170382	LRRN2	0.2415	0.259407	0.240269	enhancer
22	ENSG00000170500	LONRF2	0.100575	0.0463766	0.495814	TF
22	ENSG00000171132	PRKCE	0.205041	0.0536999	0.28345	TF
22	ENSG00000174600	CMKLR1	0.21294	0.44073	0.107201	enhancer
22	ENSG00000181378	CFAP65	0.460431	0.157993	0.36392	promoter
22	ENSG00000183723	CMTM4	0.0437152	0.168633	0.278885	TF
22	ENSG00000185532	PRKG1	0.486985	0.0969413	0.34627	promoter
22	ENSG00000187889	C1orf168	0.399414	0.374482	0.216367	promoter
22	ENSG00000197555	SIPA1L1	0.282158	0.0461014	0.0149853	promoter
22	ENSG00000243910	TUBA4B	0.680887	0.0545371	0.19594	promoter
22	ENSG00000250362	AC008592.5	0.0592091	0.526291	0.305274	enhancer
22	ENSG00000263938	RP11-579O24.3	0.137464	0.0416059	0.595163	TF
22	ENSG00000237928	NFIA-AS2	0.0884957	0.112722	0.0723289	enhancer
22	ENSG00000260604	RP1-140K8.5	0.182722	0.132379	0.506473	TF
22	ENSG00000109944	C11orf63	0.245353	0.385942	0.226818	enhancer
22	ENSG00000110880	CORO1C	0.201339	0.47436	0.19124	enhancer
22	ENSG00000127311	HELB	0.481563	0.135167	0.15524	promoter
22	ENSG00000153993	SEMA3D	0.0430156	0.0305633	0.16759	TF
22	ENSG00000173557	C2orf70	0.184514	0.272544	0.208449	enhancer
22	ENSG00000188931	CFAP126	0.127422	0.414183	0.214164	enhancer
22	ENSG00000198774	RASSF9	0.13237	0.270025	0.534103	TF
22	ENSG00000226644	RP11-128M1.1	0.306177	0.305894	0.173449	promoter
22	ENSG00000102572	STK24	0.636129	0.266941	0.0266567	promoter
22	ENSG00000104059	FAM189A1	0.0737855	0.563746	0.183974	enhancer
22	ENSG00000175274	TP53I11	0.173385	0.161244	0.162163	promoter
22	ENSG00000182329	KIAA2012	0.175556	0.190701	0.480853	TF
22	ENSG00000151893	CACUL1	0.119102	0.344044	0.19719	enhancer
23	ENSG00000229204	PTGES3P3	0.189988	0.12894	0.543444	TF
23	ENSG00000080224	EPHA6	0.077948	0.844152	0.0625214	enhancer
23	ENSG00000116704	SLC35D1	0.49922	0.204099	0.024589	promoter
23	ENSG00000120915	EPHX2	0.116398	0.130901	0.442586	TF
23	ENSG00000129595	EPB41L4A	0.19365	0.147307	0.624376	TF
23	ENSG00000157036	EXOG	0.326911	0.267444	0.326583	promoter
23	ENSG00000164164	OTUD4	0.236769	0.162825	0.501477	TF
23	ENSG00000225376	TMEM246-AS1	0.0224968	0.513439	0.242781	enhancer
23	ENSG00000260466	RP4-536B24.2	0.232784	0.204814	0.2254	promoter
23	ENSG00000131389	SLC6A6	0.104742	0.372752	0.368999	enhancer
23	ENSG00000198626	RYR2	0.0612802	0.0654468	0.2363	TF
23	ENSG00000249412	CTC-563A5.2	0.147363	0.206632	0.237857	TF
23	ENSG00000255506	RP11-203F8.1	0.0611926	0.751914	0.0959929	enhancer
23	ENSG00000163428	LRRC58	0.116602	0.25379	0.126553	enhancer
23	ENSG00000243478	AOX2P	0.48579	0.350961	0.0468518	promoter
24	ENSG00000001167	NFYA	0.0767671	0.548063	0.0471345	enhancer
24	ENSG00000119535	CSF3R	0.116736	0.303696	0.194965	enhancer
24	ENSG00000136960	ENPP2	0.416991	0.398937	0.102254	promoter
24	ENSG00000140848	CPNE2	0.354231	0.36469	0.122414	enhancer
24	ENSG00000157851	DPYSL5	0.0505428	0.713693	0.0937768	enhancer
24	ENSG00000166326	TRIM44	0.0859054	0.100151	0.151389	TF
24	ENSG00000175318	GRAMD2	0.156848	0.55415	0.177246	enhancer
24	ENSG00000187091	PLCD1	0.0969042	0.105214	0.0453971	enhancer
24	ENSG00000197971	MBP	0.297551	0.348456	0.12379	enhancer
24	ENSG00000204655	MOG	0.239082	0.128034	0.291513	TF
24	ENSG00000023697	DERA	0.380985	0.14955	0.314002	promoter
24	ENSG00000101096	NFATC2	0.563961	0.126179	0.0607592	promoter
24	ENSG00000105137	SYDE1	0.239791	0.122306	0.405971	TF
24	ENSG00000113739	STC2	0.136405	0.0720482	0.0572207	promoter
24	ENSG00000124782	RREB1	0.0790047	0.137199	0.190147	TF
24	ENSG00000131080	EDA2R	0.194323	0.140836	0.0879071	promoter
24	ENSG00000138085	ATRAID	0.0845818	0.317732	0.401122	TF
24	ENSG00000142039	CCDC97	0.0689014	0.0364112	0.170426	TF
24	ENSG00000143845	ETNK2	0.252588	0.394418	0.0660983	enhancer
24	ENSG00000144730	IL17RD	0.049262	0.300909	0.160263	enhancer
24	ENSG00000155254	MARVELD1	0.218918	0.235902	0.481191	TF
24	ENSG00000158246	FAM46B	0.292278	0.318514	0.231802	enhancer
24	ENSG00000169756	LIMS1	0.293931	0.34549	0.116357	enhancer
24	ENSG00000135373	EHF	0.560958	0.26151	0.127814	promoter
24	ENSG00000135845	PIGC	0.141076	0.458926	0.304785	enhancer
24	ENSG00000164251	F2RL1	0.429084	0.263606	0.282935	promoter
24	ENSG00000179532	DNHD1	0.160867	0.013273	0.0748043	promoter
24	ENSG00000227723	CTA-31J9.2	0.196844	0.417172	0.297169	enhancer
24	ENSG00000112655	PTK7	0.211132	0.218657	0.041827	enhancer
24	ENSG00000140807	NKD1	0.196542	0.519792	0.182881	enhancer
24	ENSG00000149115	TNKS1BP1	0.132855	0.0980509	0.213329	TF
24	ENSG00000162396	PARS2	0.0766211	0.165632	0.652046	TF
24	ENSG00000186529	CYP4F3	0.405009	0.0706074	0.336584	promoter
24	ENSG00000188916	FAM196A	0.32371	0.472634	0.105819	enhancer
24	ENSG00000185112	FAM43A	0.271781	0.251843	0.042331	promoter
24	ENSG00000088387	DOCK9	0.165206	0.1732	0.429365	TF
24	ENSG00000144036	EXOC6B	0.0528444	0.686466	0.0934301	enhancer
24	ENSG00000163393	SLC22A15	0.0643663	0.729582	0.10852	enhancer
