# Supplementary material for: Human-specific features of spatial gene expression and regulation in eight brain regions
Source: HighWire-hosted journal article supplement (doi:10.1101/gr.231357.117), 2018-06-13
Supplement: Supplemental_Table_S12.xlsx [file Supplemental_Table_S12.xlsx]

## Sheet: Table_S6.txt
Supplemental Table S12. Primers used in RT-qPCR
RSPH1	Foward	CATGGCCAGGGGATCTACAA
RSPH1	Reverse	AAGTGCCTTGACCGTGCTTT
PDLIM4	Foward	CATCCCGAGTGCTTCATGTG
PDLIM4	Reverse	CCGCTCGTCCAGAAAGAAGT
FOLR1	Foward	CAGCGGATGACAACACAGC
FOLR1	Reverse	TGCAATCCTTGTCTGAGCCT
CNN3	Foward	ACCAGGATGACTACCCCAGA
CNN3	Reverse	CTGAGCTCCTTCTGTGTGGA
F3	Foward	TGTTCAAATAAGCACTAAGTCAGGA
F3	Reverse	TCACATCCTTCACAATCTCGTC
PBXIP1	Foward	CAGACAGGTGATGATGATGAAGT
PBXIP1	Reverse	TGTCCTTCTTCCCTGACCTC
RGMA	Foward	TCTAGTGCACGTGACAAGGT
RGMA	Reverse	CTGCTCTCCCTCTCACACAG
