# Supplementary material for: Human-specific features of spatial gene expression and regulation in eight brain regions
Source: HighWire-hosted journal article supplement (doi:10.1101/gr.231357.117), 2018-06-13
Supplement: Supplemental_Table_S13.xlsx [file Supplemental_Table_S13.xlsx]

## Sheet: 工作表1
Supplemental Table S13. Primary antibodies used in the immunohistochemistry
Antibodies	Gene	Made in	Dilution	Source
TSGA2 Antibody (H-88)	RSPH1	rabbit	1:250	Santa Cruz sc-382447
RIL Antibody (H-130)	PDLIM4	rabbit	1:250	Santa Cruz sc-98371
FOLR1 Antibody	FOLR1	rabbit	1:250	Novus Biologicals NBP1-32293
Calponin 3 Antibody (H-55)	CNN3	rabbit	1:250	Santa Cruz sc-28546
Coagulation Factor III Antibody	F3	rabbit	1:250	Novus Biologicals NBP2-15139
PBXIP1 Antibody	PBXIP1	rabbit	1:250	Novus Biologicals NBP1-83222
RGMa Antibody (H-75)	RGMA	rabbit	1:250	Santa Cruz sc-67052
