# Supplementary material for: Human-specific features of spatial gene expression and regulation in eight brain regions
Source: HighWire-hosted journal article supplement (doi:10.1101/gr.231357.117), 2018-06-13
Supplement: Supplemental_Table_S14.xlsx [file Supplemental_Table_S14.xlsx]

## Sheet: 工作表1
Supplemental Table S14. Secondary antibodies and dyes used in the immunohistochemistry
Antibodies/dyes	Made in	Dilution	Conjugate	Source
anti-mouse	donkey	1:500	Alexa Fluor488	Molecular Probes A-21202
anti-chicken	donkey	1:500	Alexa Fluor647	Jackson 703-606-155
anti-rabbit	horse	1:250	Biotinylated	Vector Labs BA-1100
streptavidin		1:500	AlexaFluor568	Molecular Probes S-11226
DAPI		1:500		Molecular Probes D1306
